# Supplementary material for: A convenient approach to β-heteroarylated (C–N bond) ketones from Cs2CO3 promoted reaction between propargyl alcohols and nitrogen-heterocycles
Source: Royal Society of Chemistry journal article supplement (doi:10.1039/c2ob25165e), 2012-01-01
Supplement: c2ob25165e.pdf [file c2ob25165e.pdf]

# FLASH EA 1112 SERIES CHN REPORT

## SCHOOL OF CHEMISTRY

## UNIVERSITY OF HYDERABAD

Method filename: E:\Program Files\Thermo Finnigan\Eager 300 for EA1112\DATA\Sys\_data\_ex  
Sample ID: K10-21 (# 9)  
Analysis type: UnkNown  
Chromatogram filename: UNK-11052011-9.dat  
Sample weight: 1.412

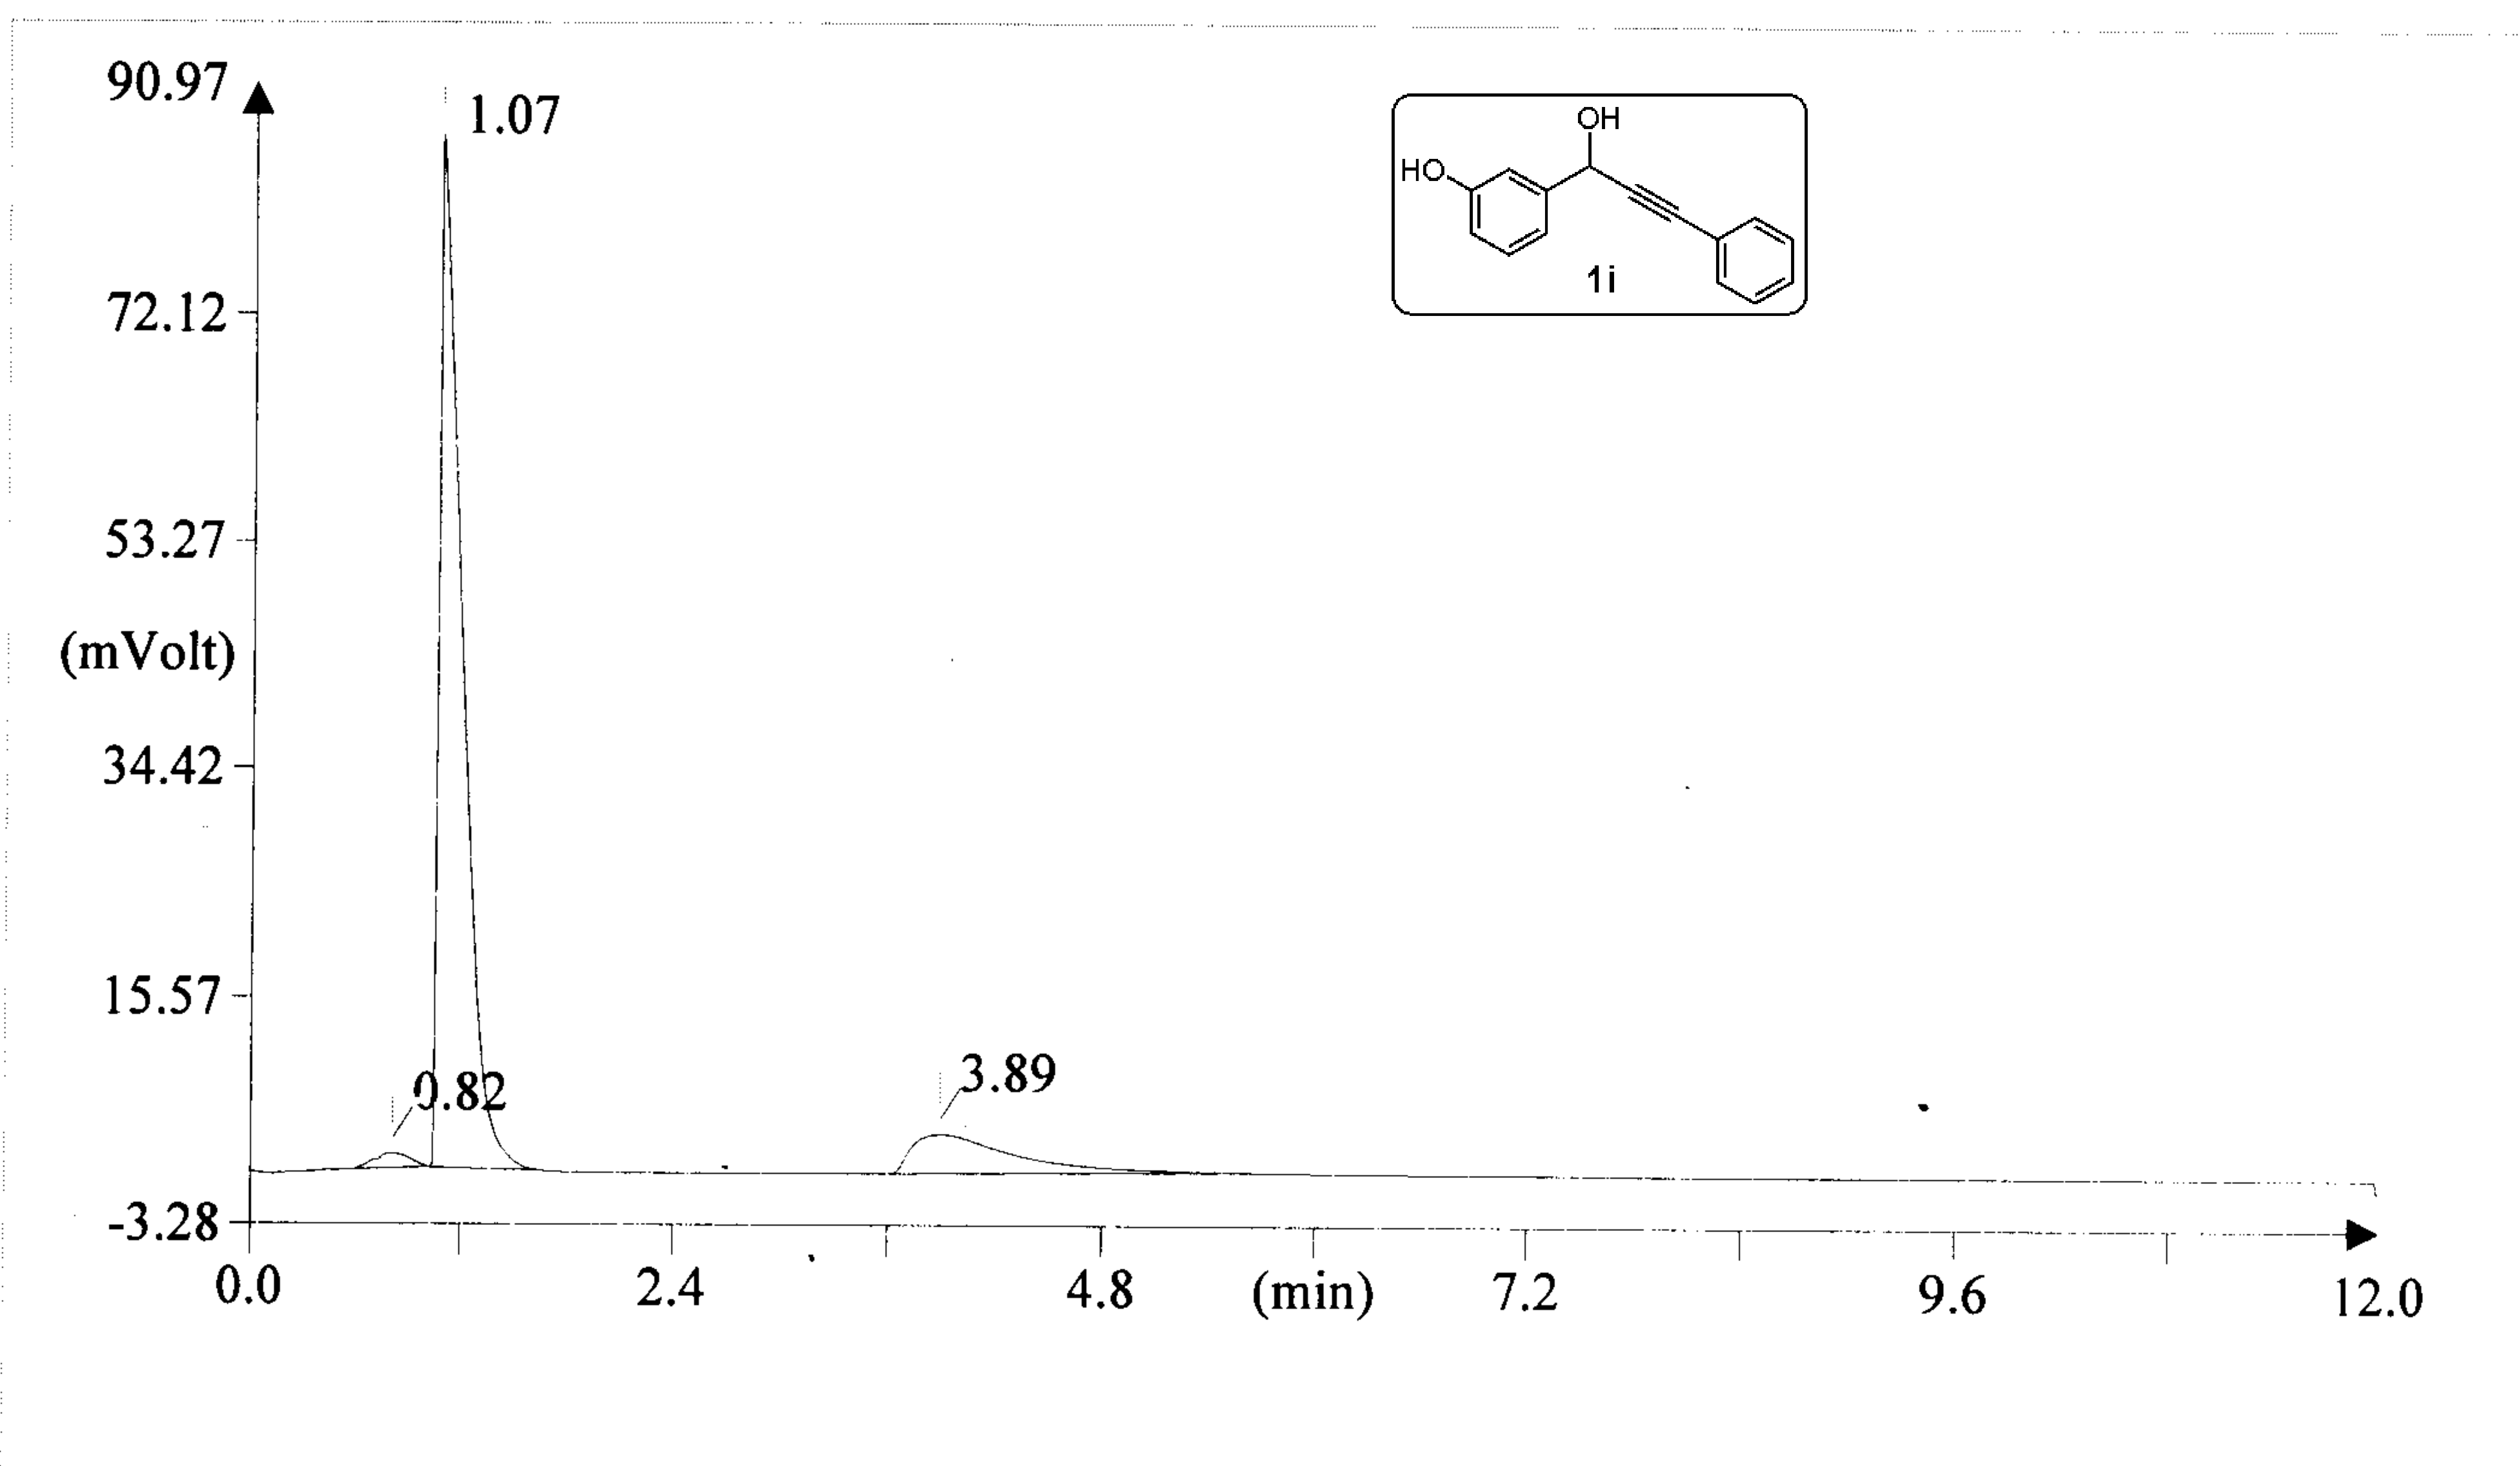

| Element Name | Element % | Ret. Time |
|--------------|-----------|-----------|
| Nitrogen     | 0. 02     | 0. 82     |
| Carbon       | 80. 15    | 1. 07     |
| Hydrogen     | 5. 31     | 3. 89     |

*BSA*

# FLASH EA 1112 SERIES CHN REPORT

## SCHOOL OF CHEMISTRY

## UNIVERSITY OF HYDERABAD

Method filename: E:\Program Files\Thermo Finnigan\Eager 300 for EA1112\DATA\Sys\_data\_ex  
 Sample ID: K10-20 (# 14)  
 Analysis type: UnkNown  
 Chromatogram filename: UNK-11052011-14.dat  
 Sample weight: 1.291

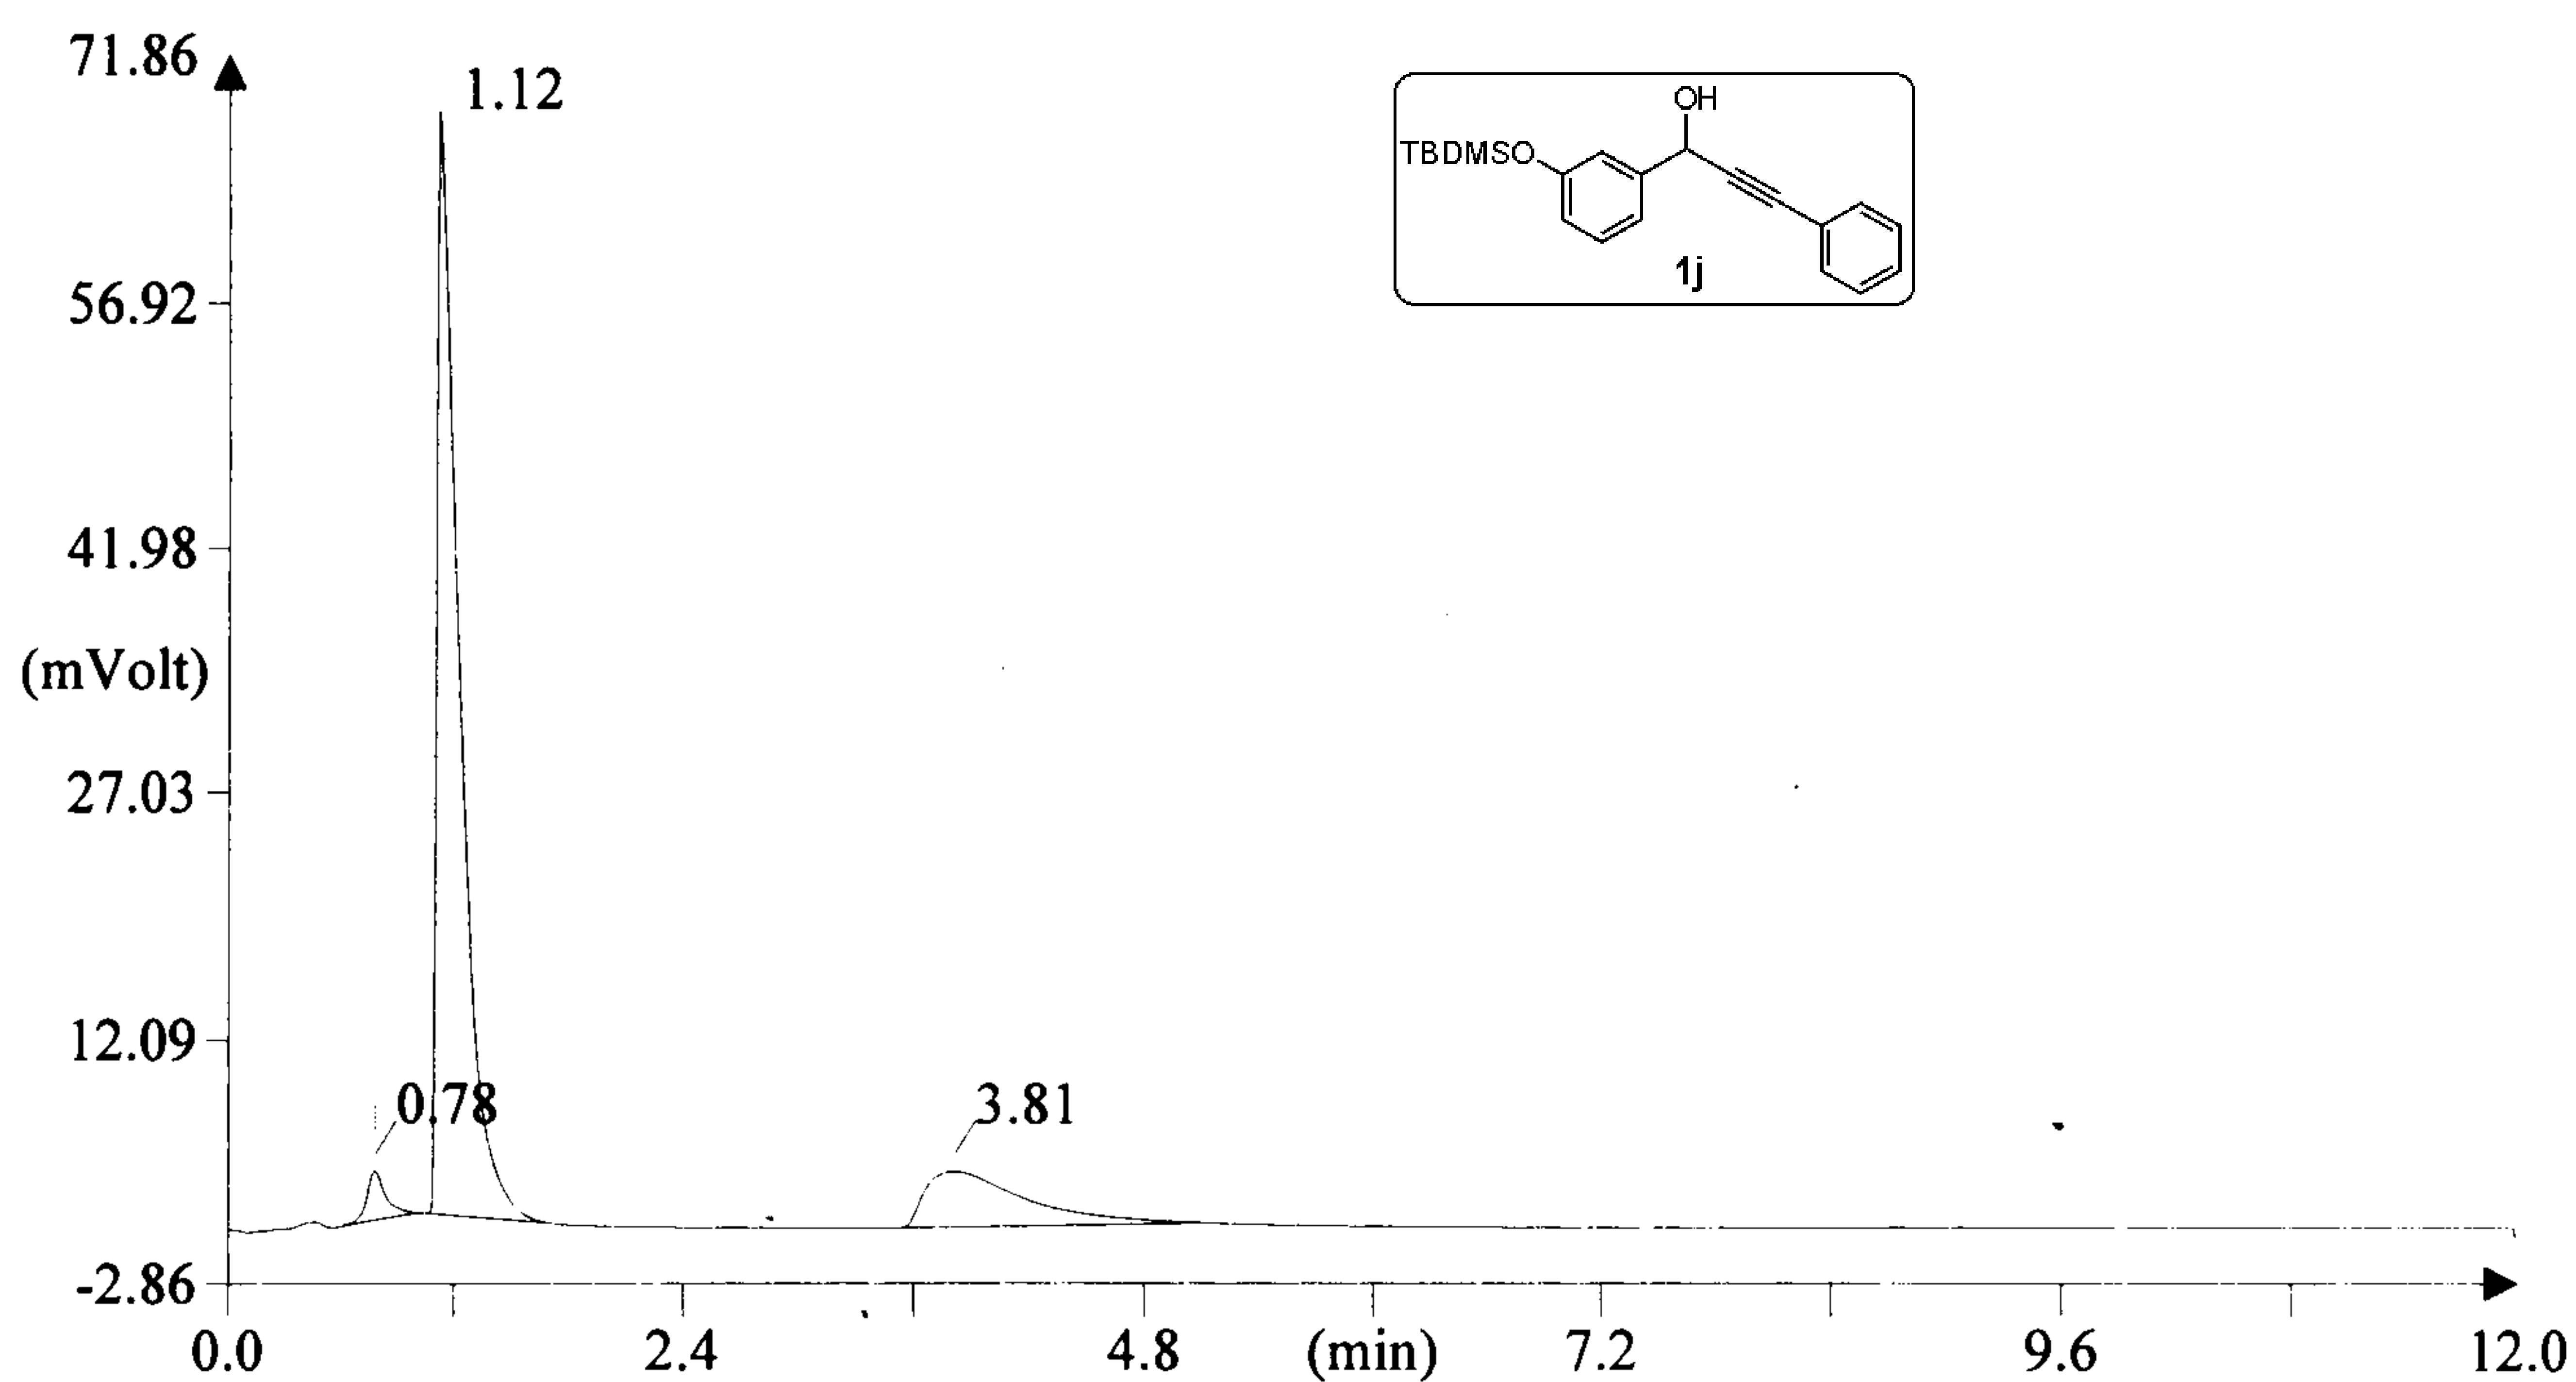

| Element Name | Element % | Ret. Time |
|--------------|-----------|-----------|
| Nitrogen     | 0. 07     | 0. 78     |
| Carbon       | 74. 45    | 1. 12     |
| Hydrogen     | 7. 71     | 3. 81     |

*Ch*

# FLASH EA 1112 SERIES CHN REPORT

## SCHOOL OF CHEMISTRY

## UNIVERSITY OF HYDERABAD

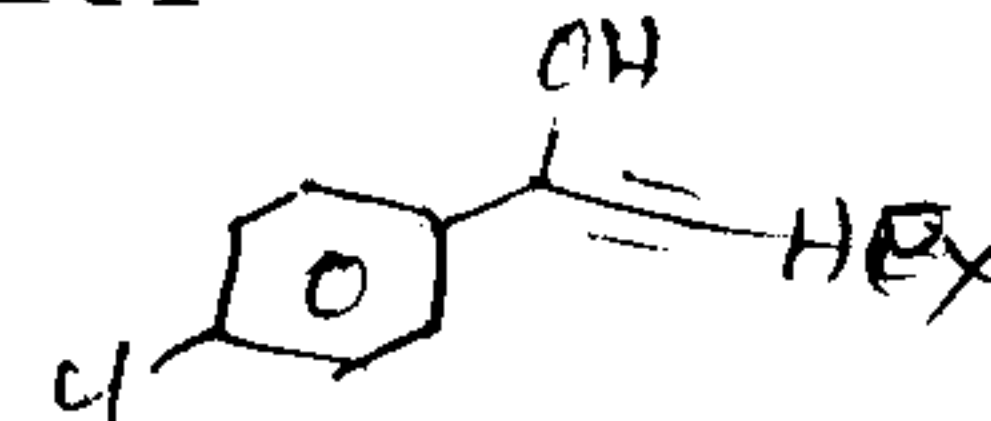

Method filename: E:\Program Files\Thermo Finnigan\Eager 300 for EA1112\DATA\Sys\_data\_ex  
 Sample ID: MBC-12-36 (# 48)  
 Analysis type: UnkNown  
 Chromatogram filename: UNK-27052011-8.dat  
 Sample weight: 1.186

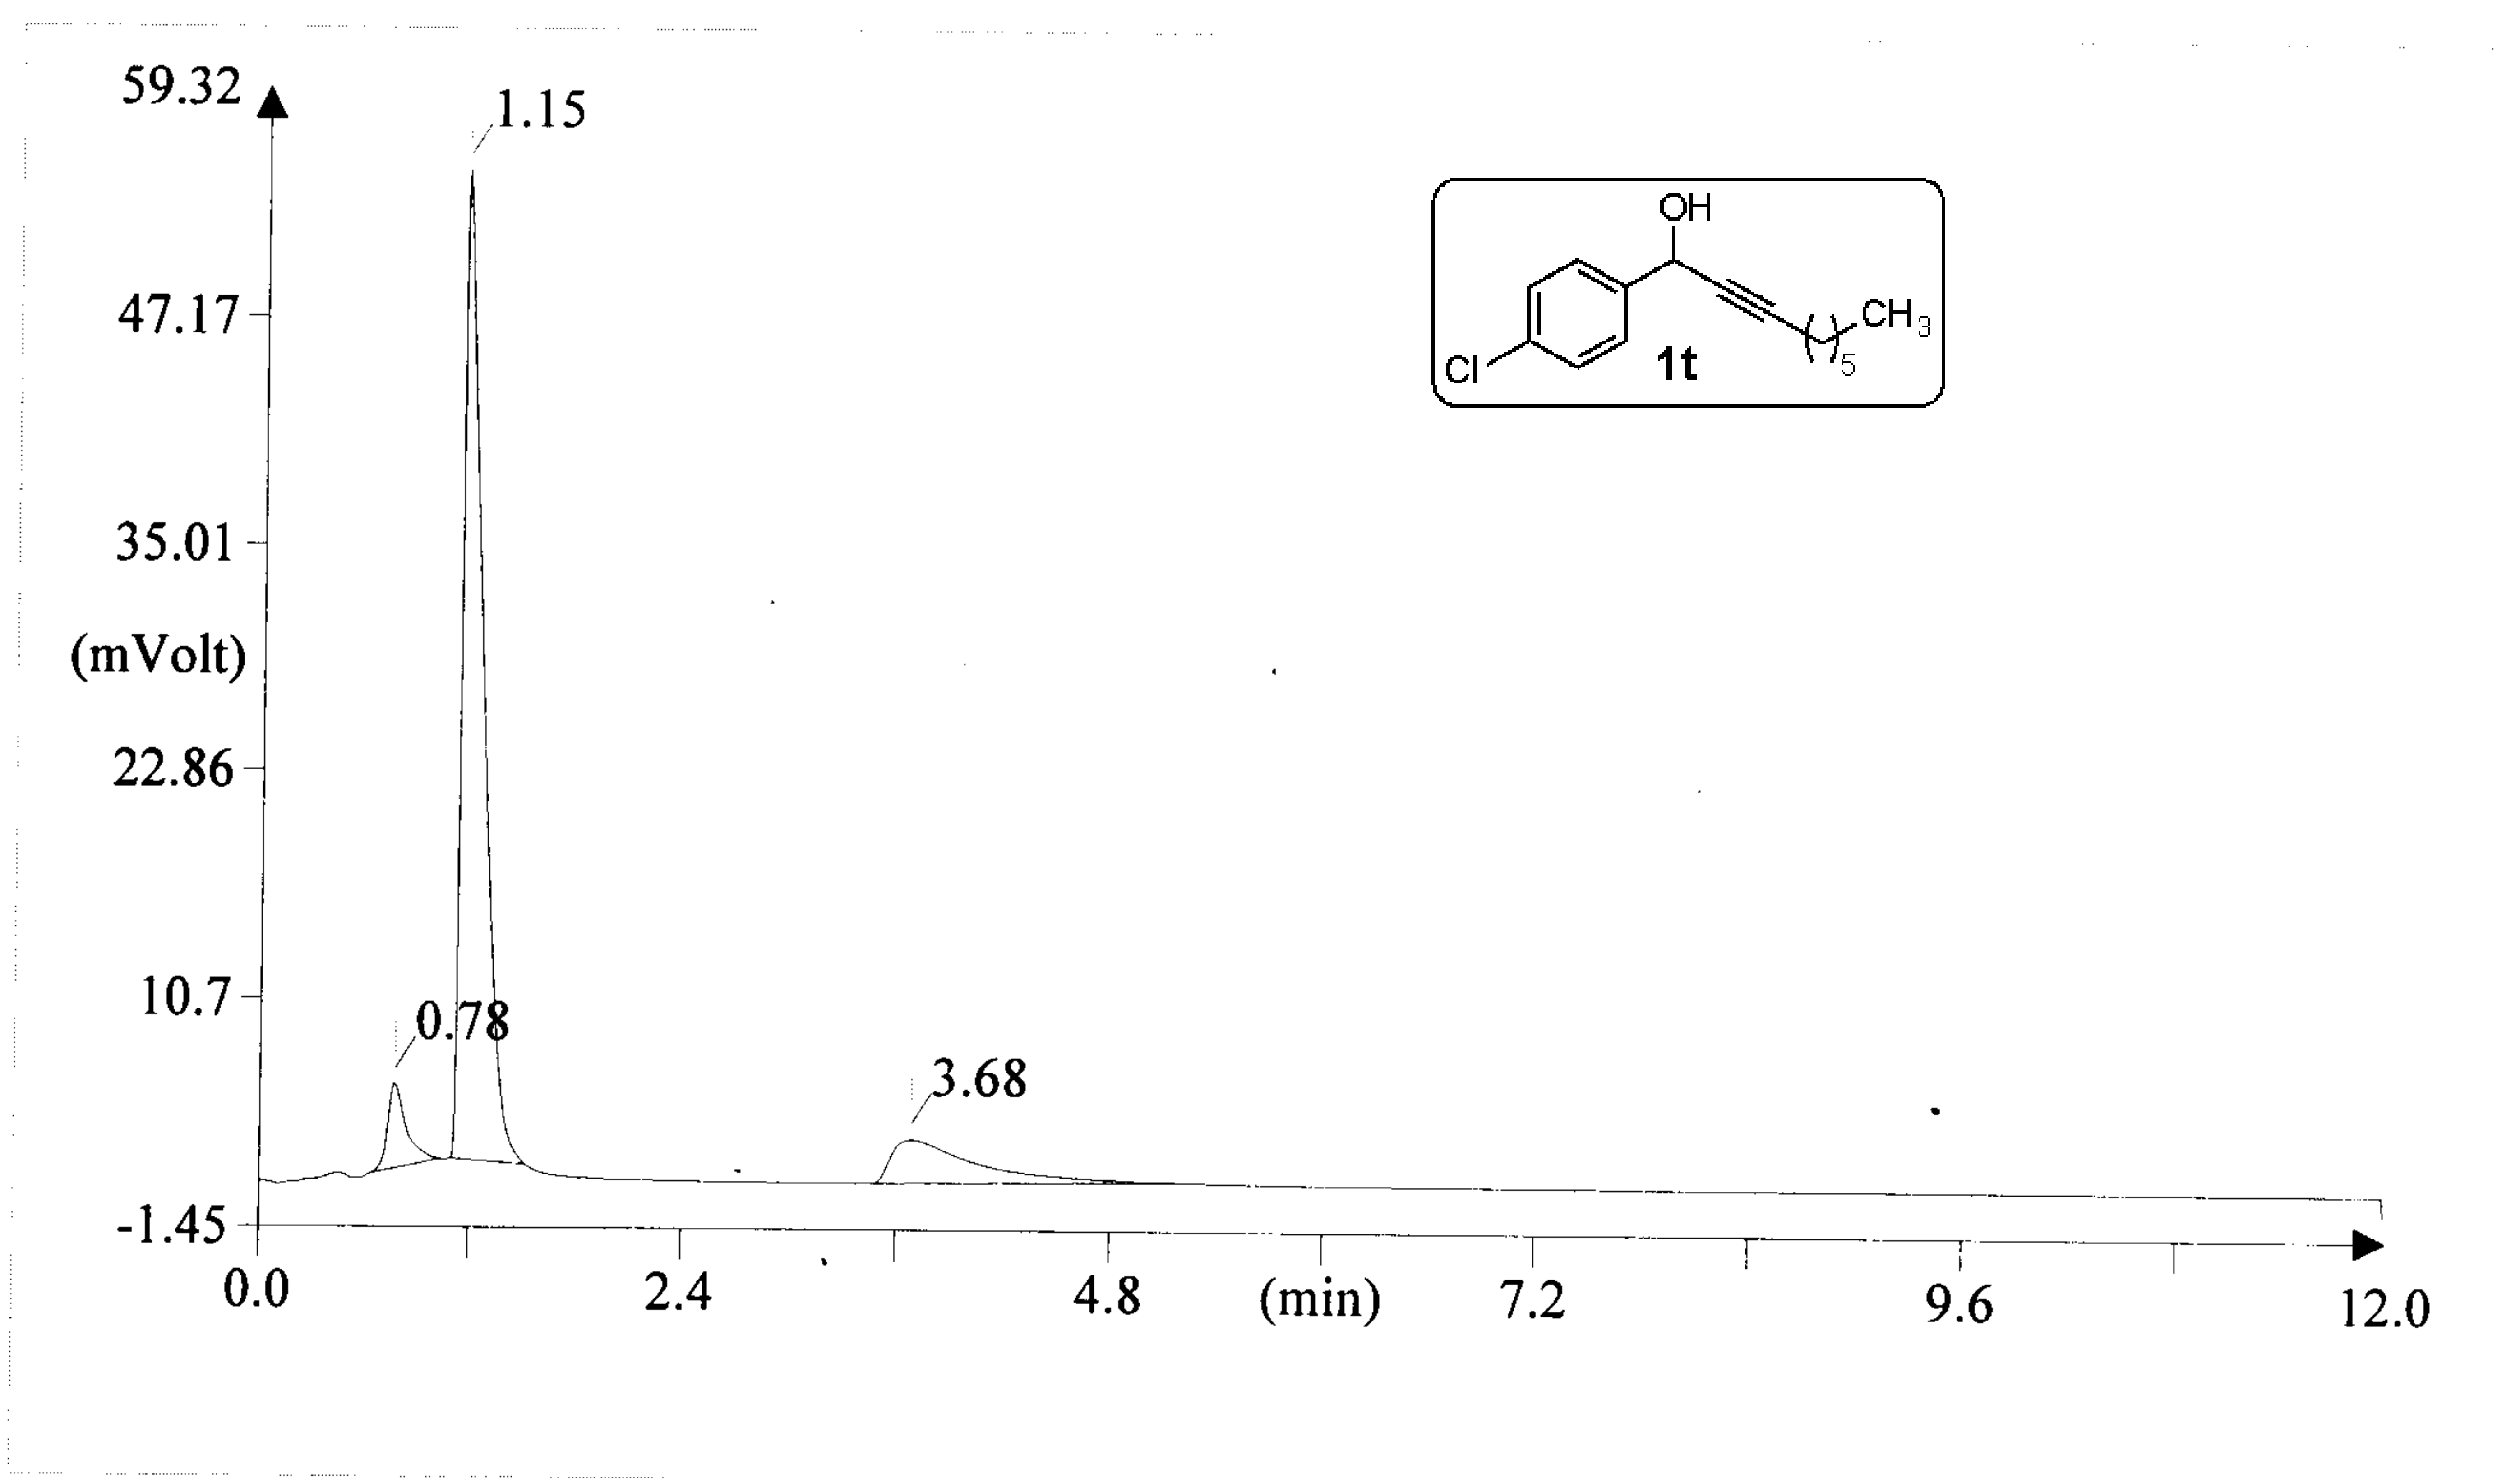

| Element Name | Element % | Ret. Time |
|--------------|-----------|-----------|
| Nitrogen     | 0. 07     | 0. 78     |
| Carbon       | 71. 94    | 1. 15     |
| Hydrogen     | 7. 69     | 3. 68     |

# FLASH EA 1112 SERIES CHN REPORT

## SCHOOL OF CHEMISTRY

## UNIVERSITY OF HYDERABAD

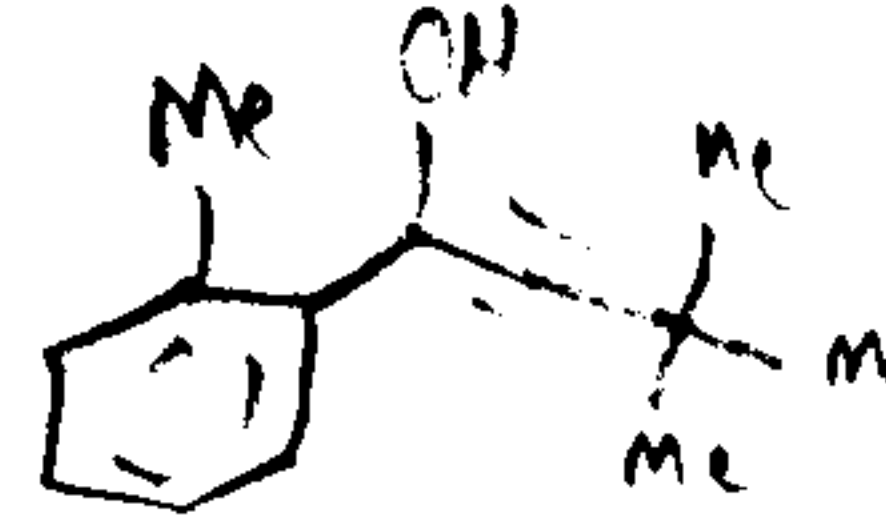

Method filename: E:\Program Files\Thermo Finnigan\Eager 300 for EA1112\DATA\Sys\_data\_ex  
 Sample ID: MBC-K10-70 (# 51)  
 Analysis type: UnkNown  
 Chromatogram filename: UNK-27052011-11.dat  
 Sample weight: 1.265

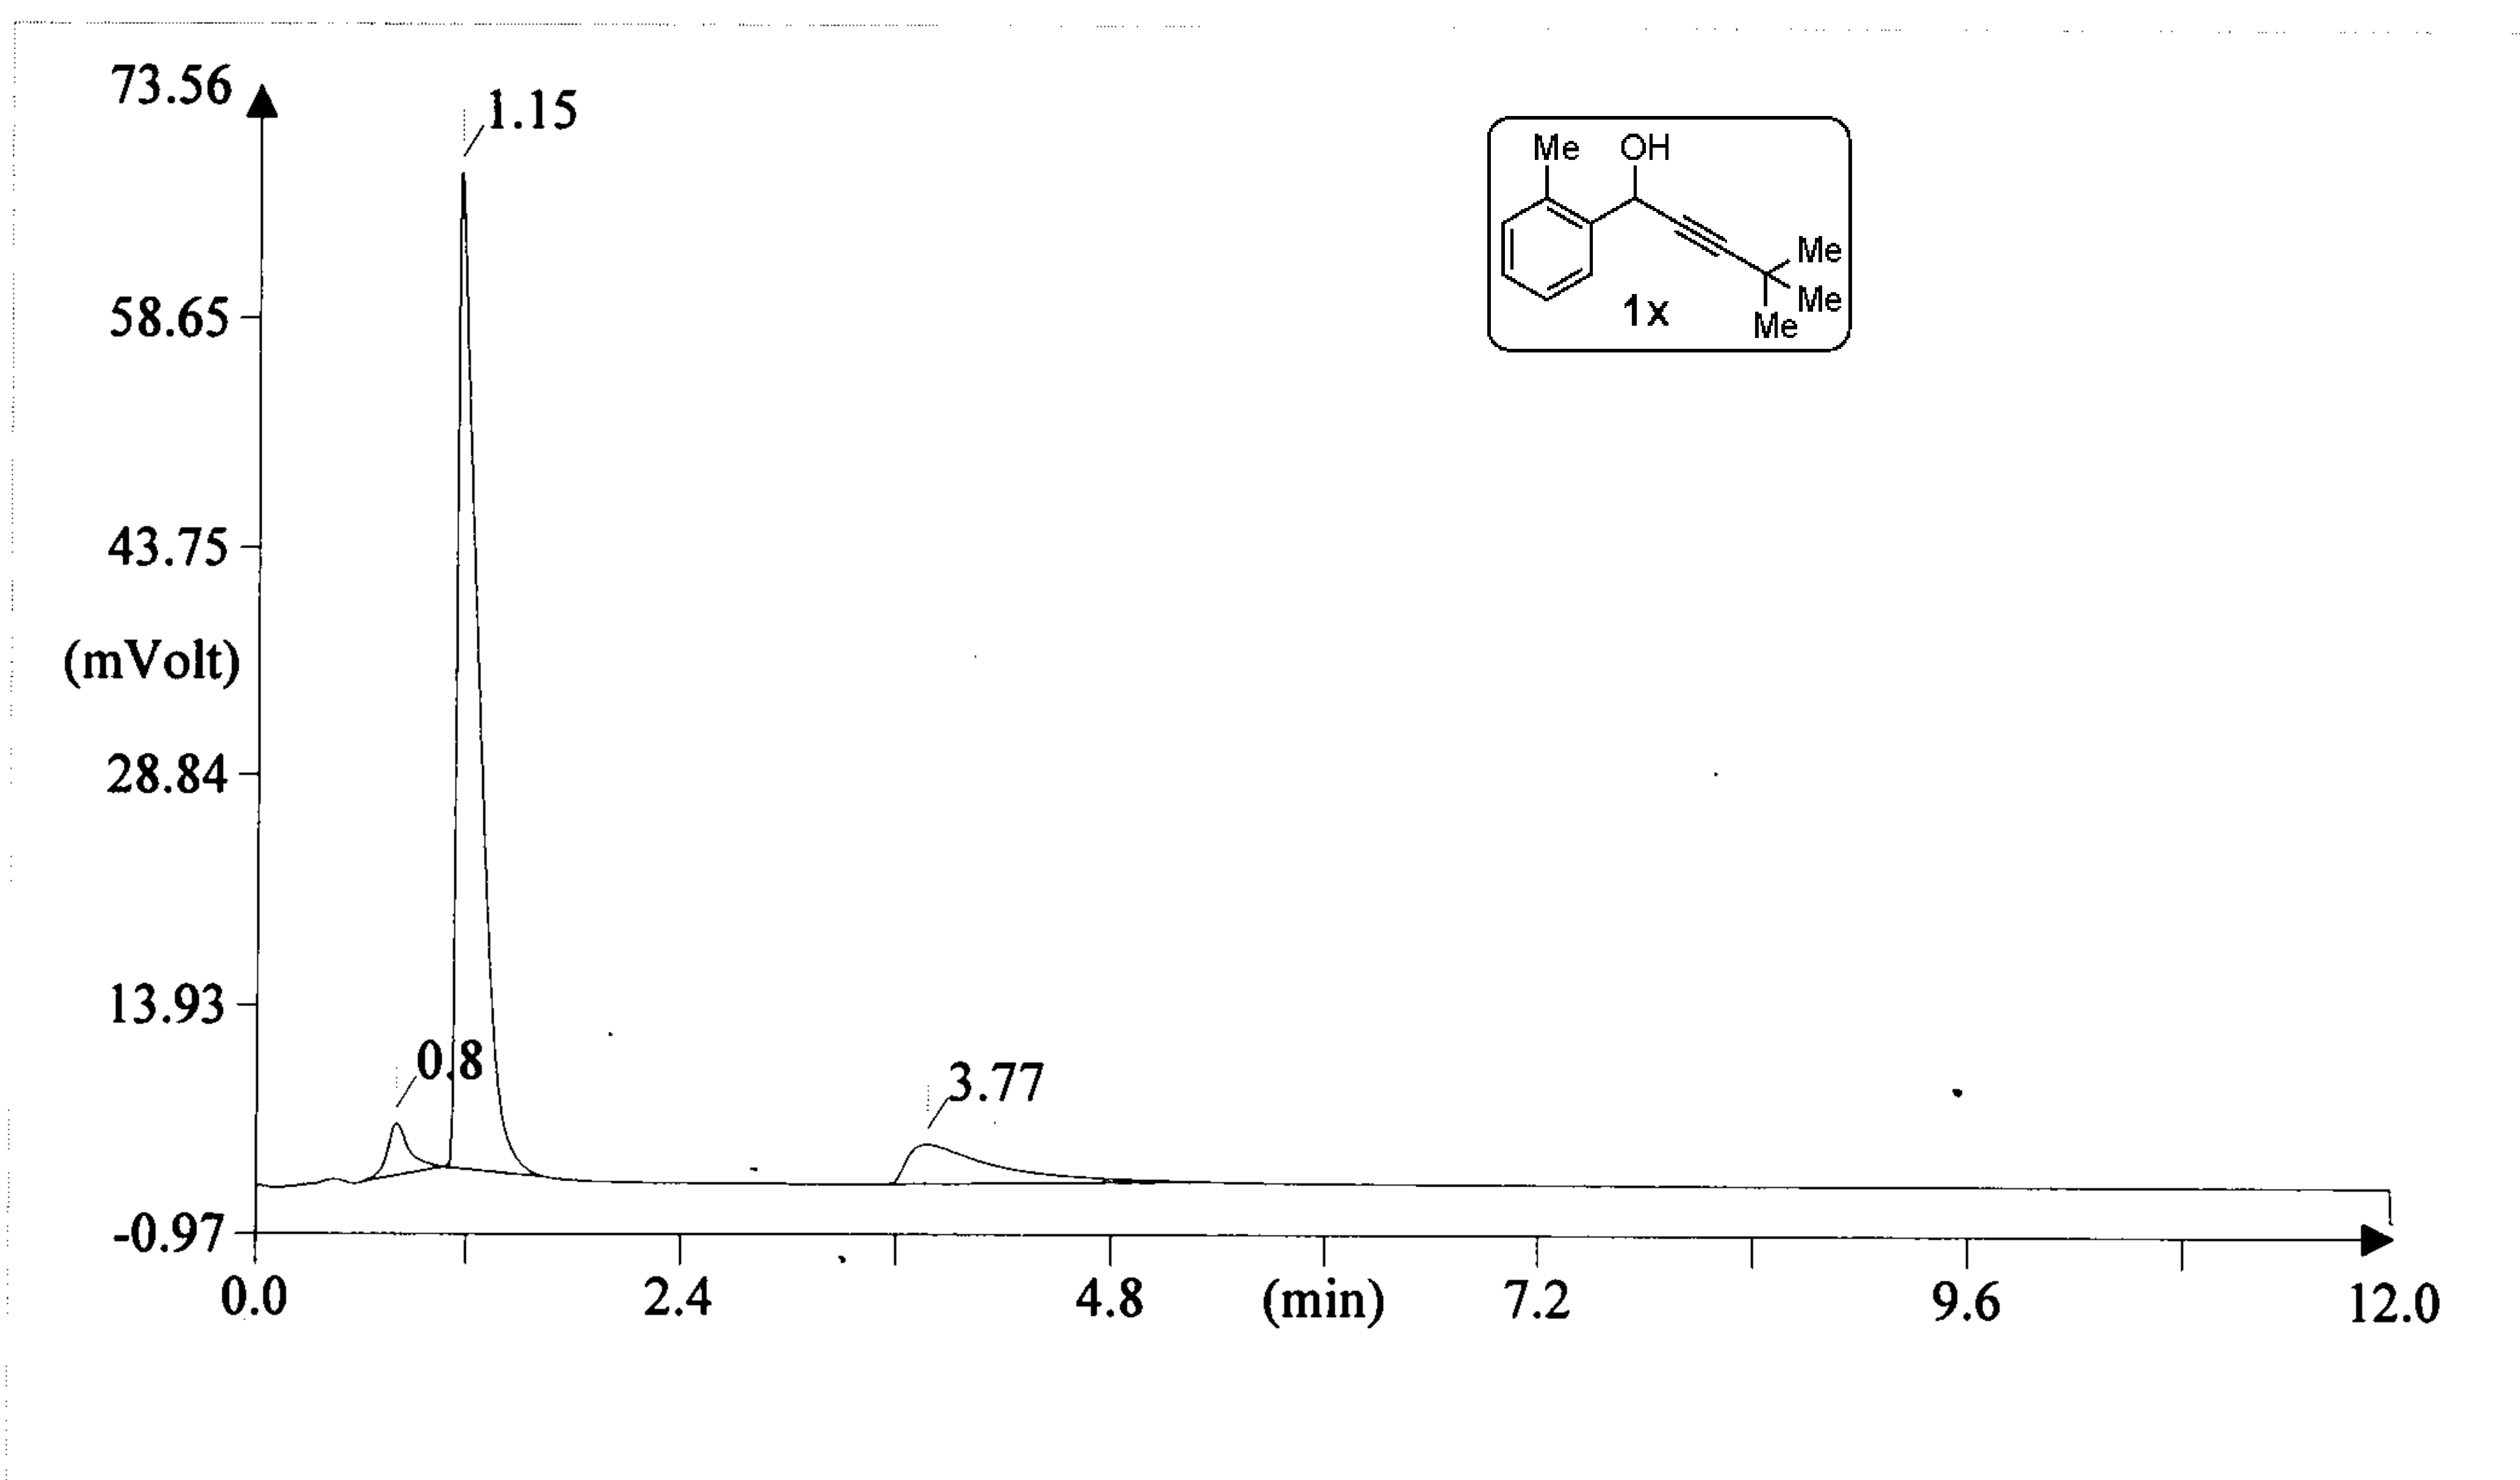

| Element Name | Element % | Ret. Time |
|--------------|-----------|-----------|
| Nitrogen     | 0. 04     | 0. 80     |
| Carbon       | 83. 21    | 1. 15     |
| Hydrogen     | 8. 92     | 3. 77     |

*[Handwritten signature]*



# FLASH EA 1112 SERIES CHN REPORT

## SCHOOL OF CHEMISTRY

## UNIVERSITY OF HYDERABAD

Method filename: E:\Program Files\Thermo Finnigan\Eager 300 for EA1112\DATA\Sys\_data\_ex  
 Sample ID: K-10-69 (# 80)  
 Analysis type: UnkNown  
 Chromatogram filename: UNK-24082011-30.dat  
 Sample weight: 1.006

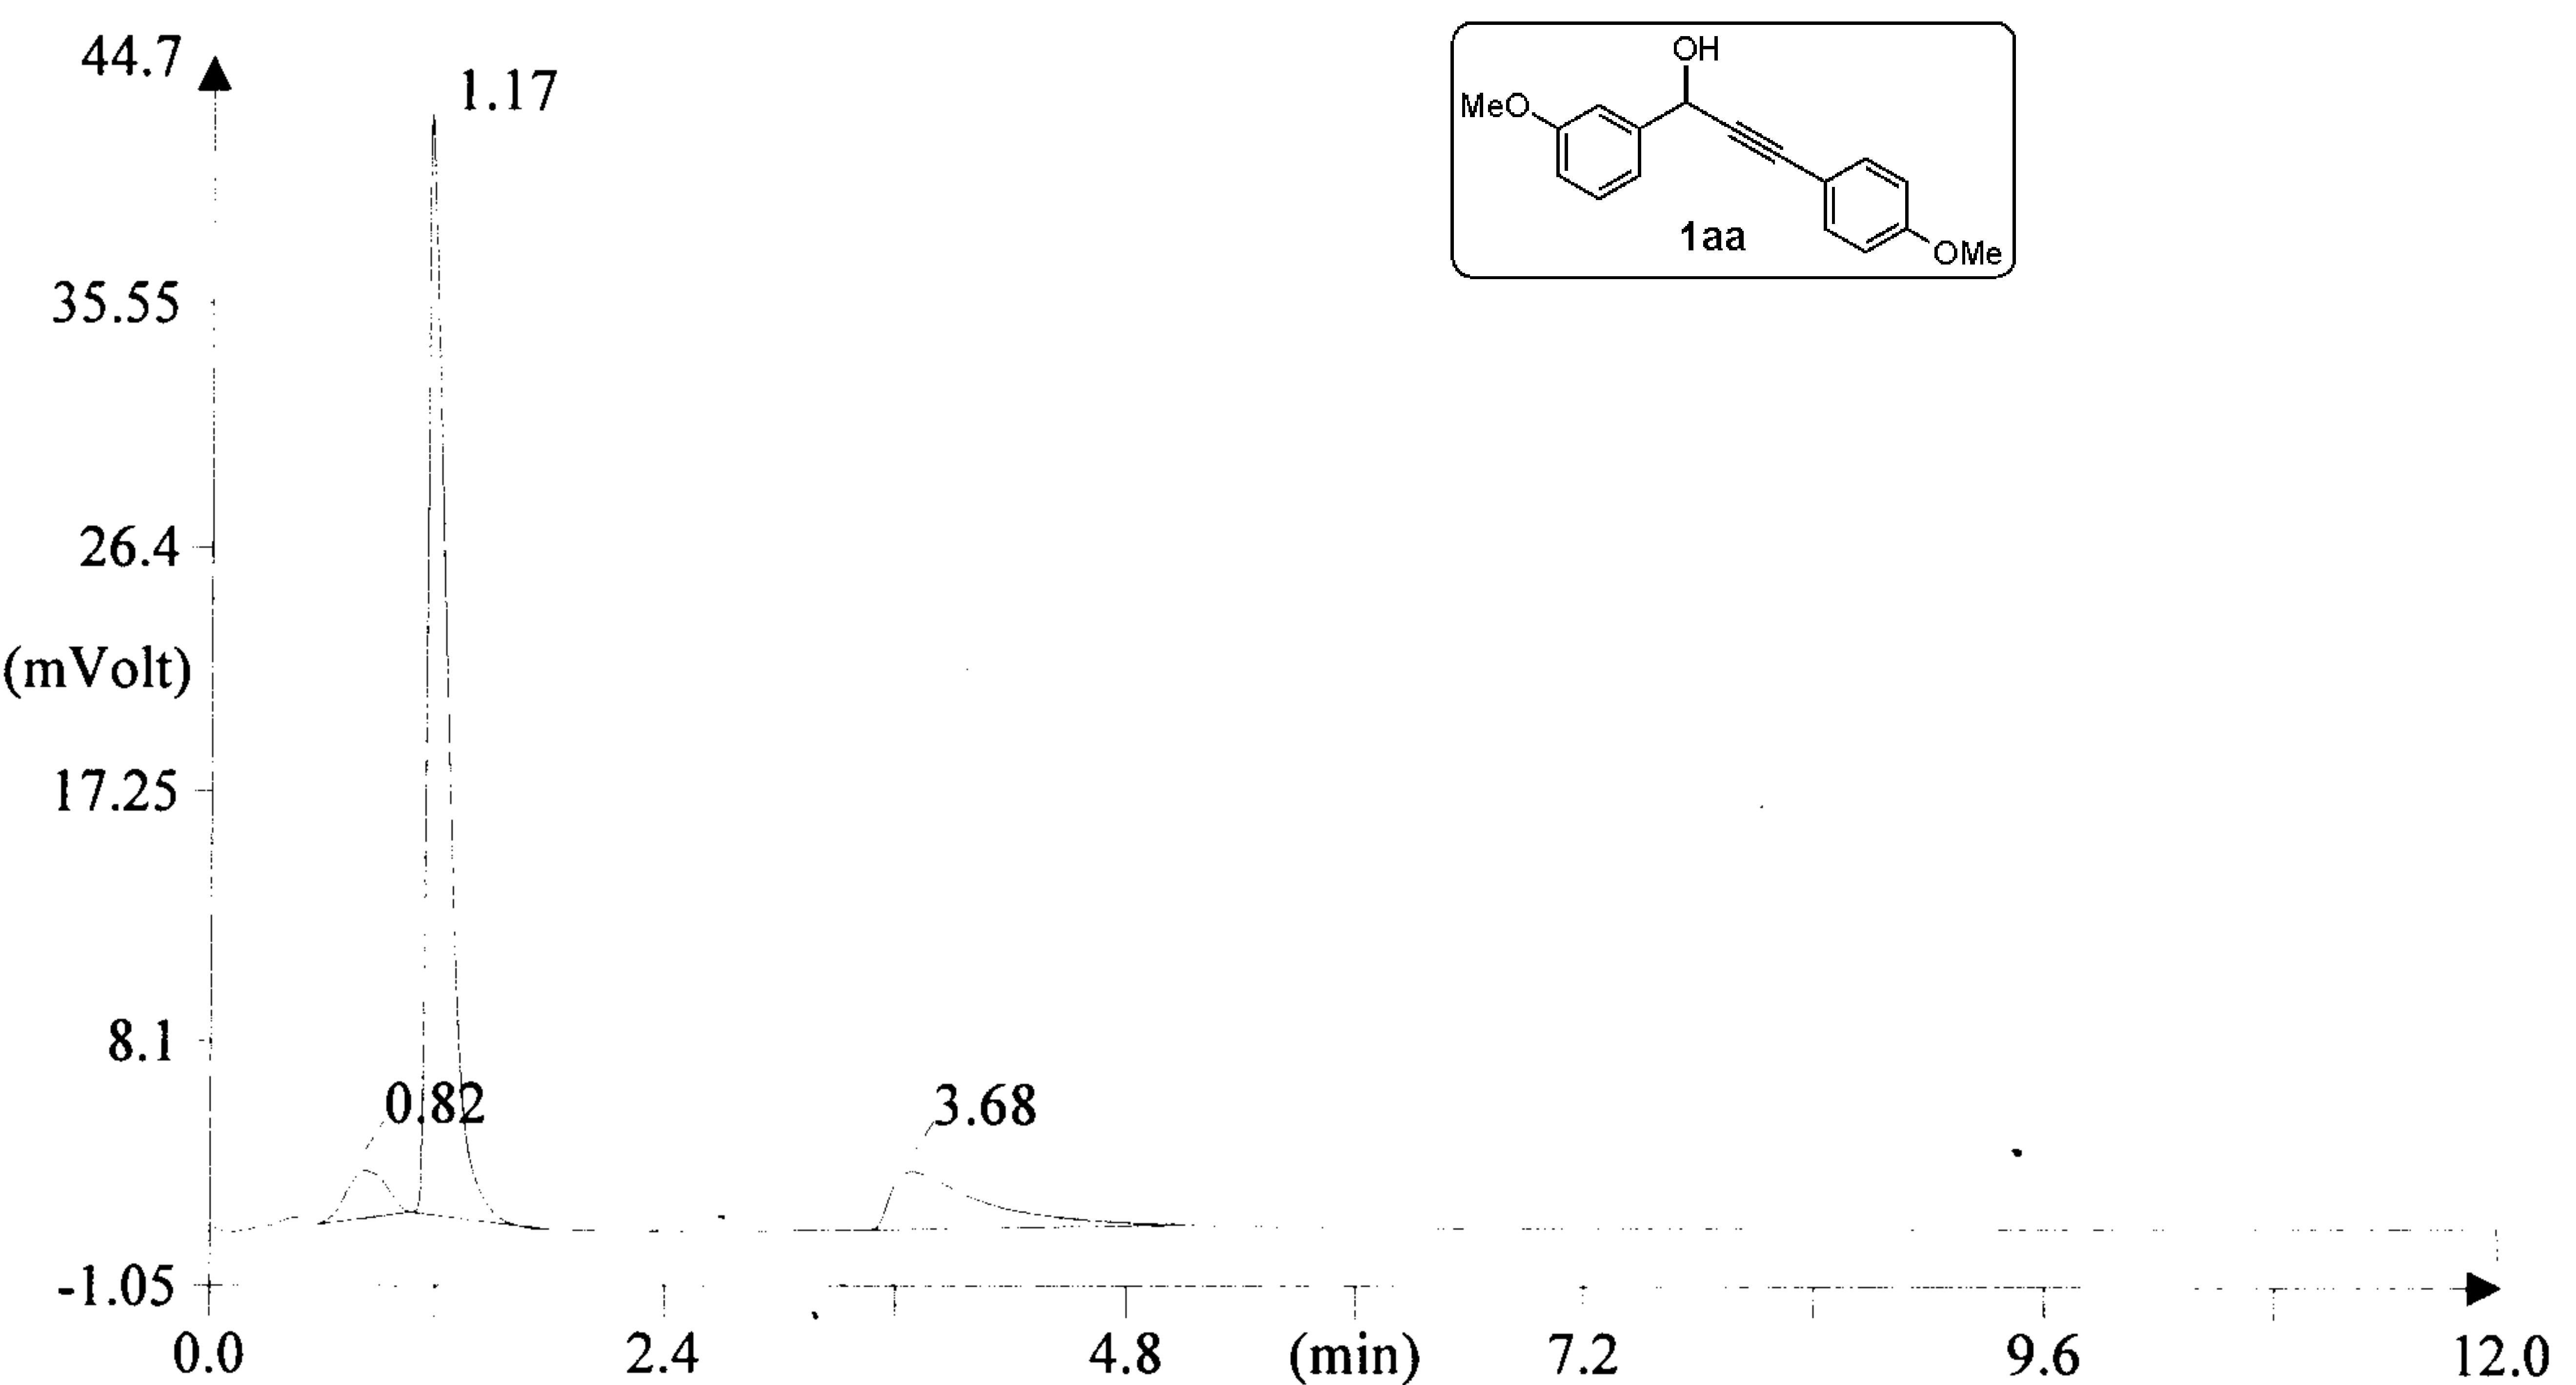

| Element Name | Element % | Ret. Time |
|--------------|-----------|-----------|
| Nitrogen     | 0. 07     | 0. 82     |
| Carbon       | 76. 23    | 1. 17     |
| Hydrogen     | 6. 10     | 3. 68     |

*Signature*

# FLASH EA 1112 SERIES CHN REPORT

## SCHOOL OF CHEMISTRY

## UNIVERSITY OF HYDERABAD

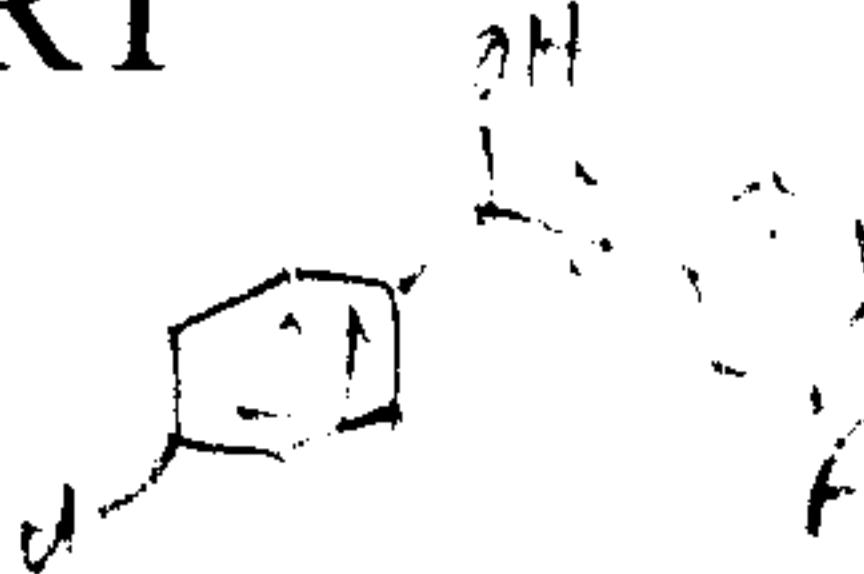

Method filename: E:\Program Files\Thermo Finnigan\Eager 300 for EA1112\DATA\Sys\_data\_ex  
 Sample ID: MBC-12-37 (# 49)  
 Analysis type: UnkNown  
 Chromatogram filename: UNK-27052011-9.dat  
 Sample weight: 1.232

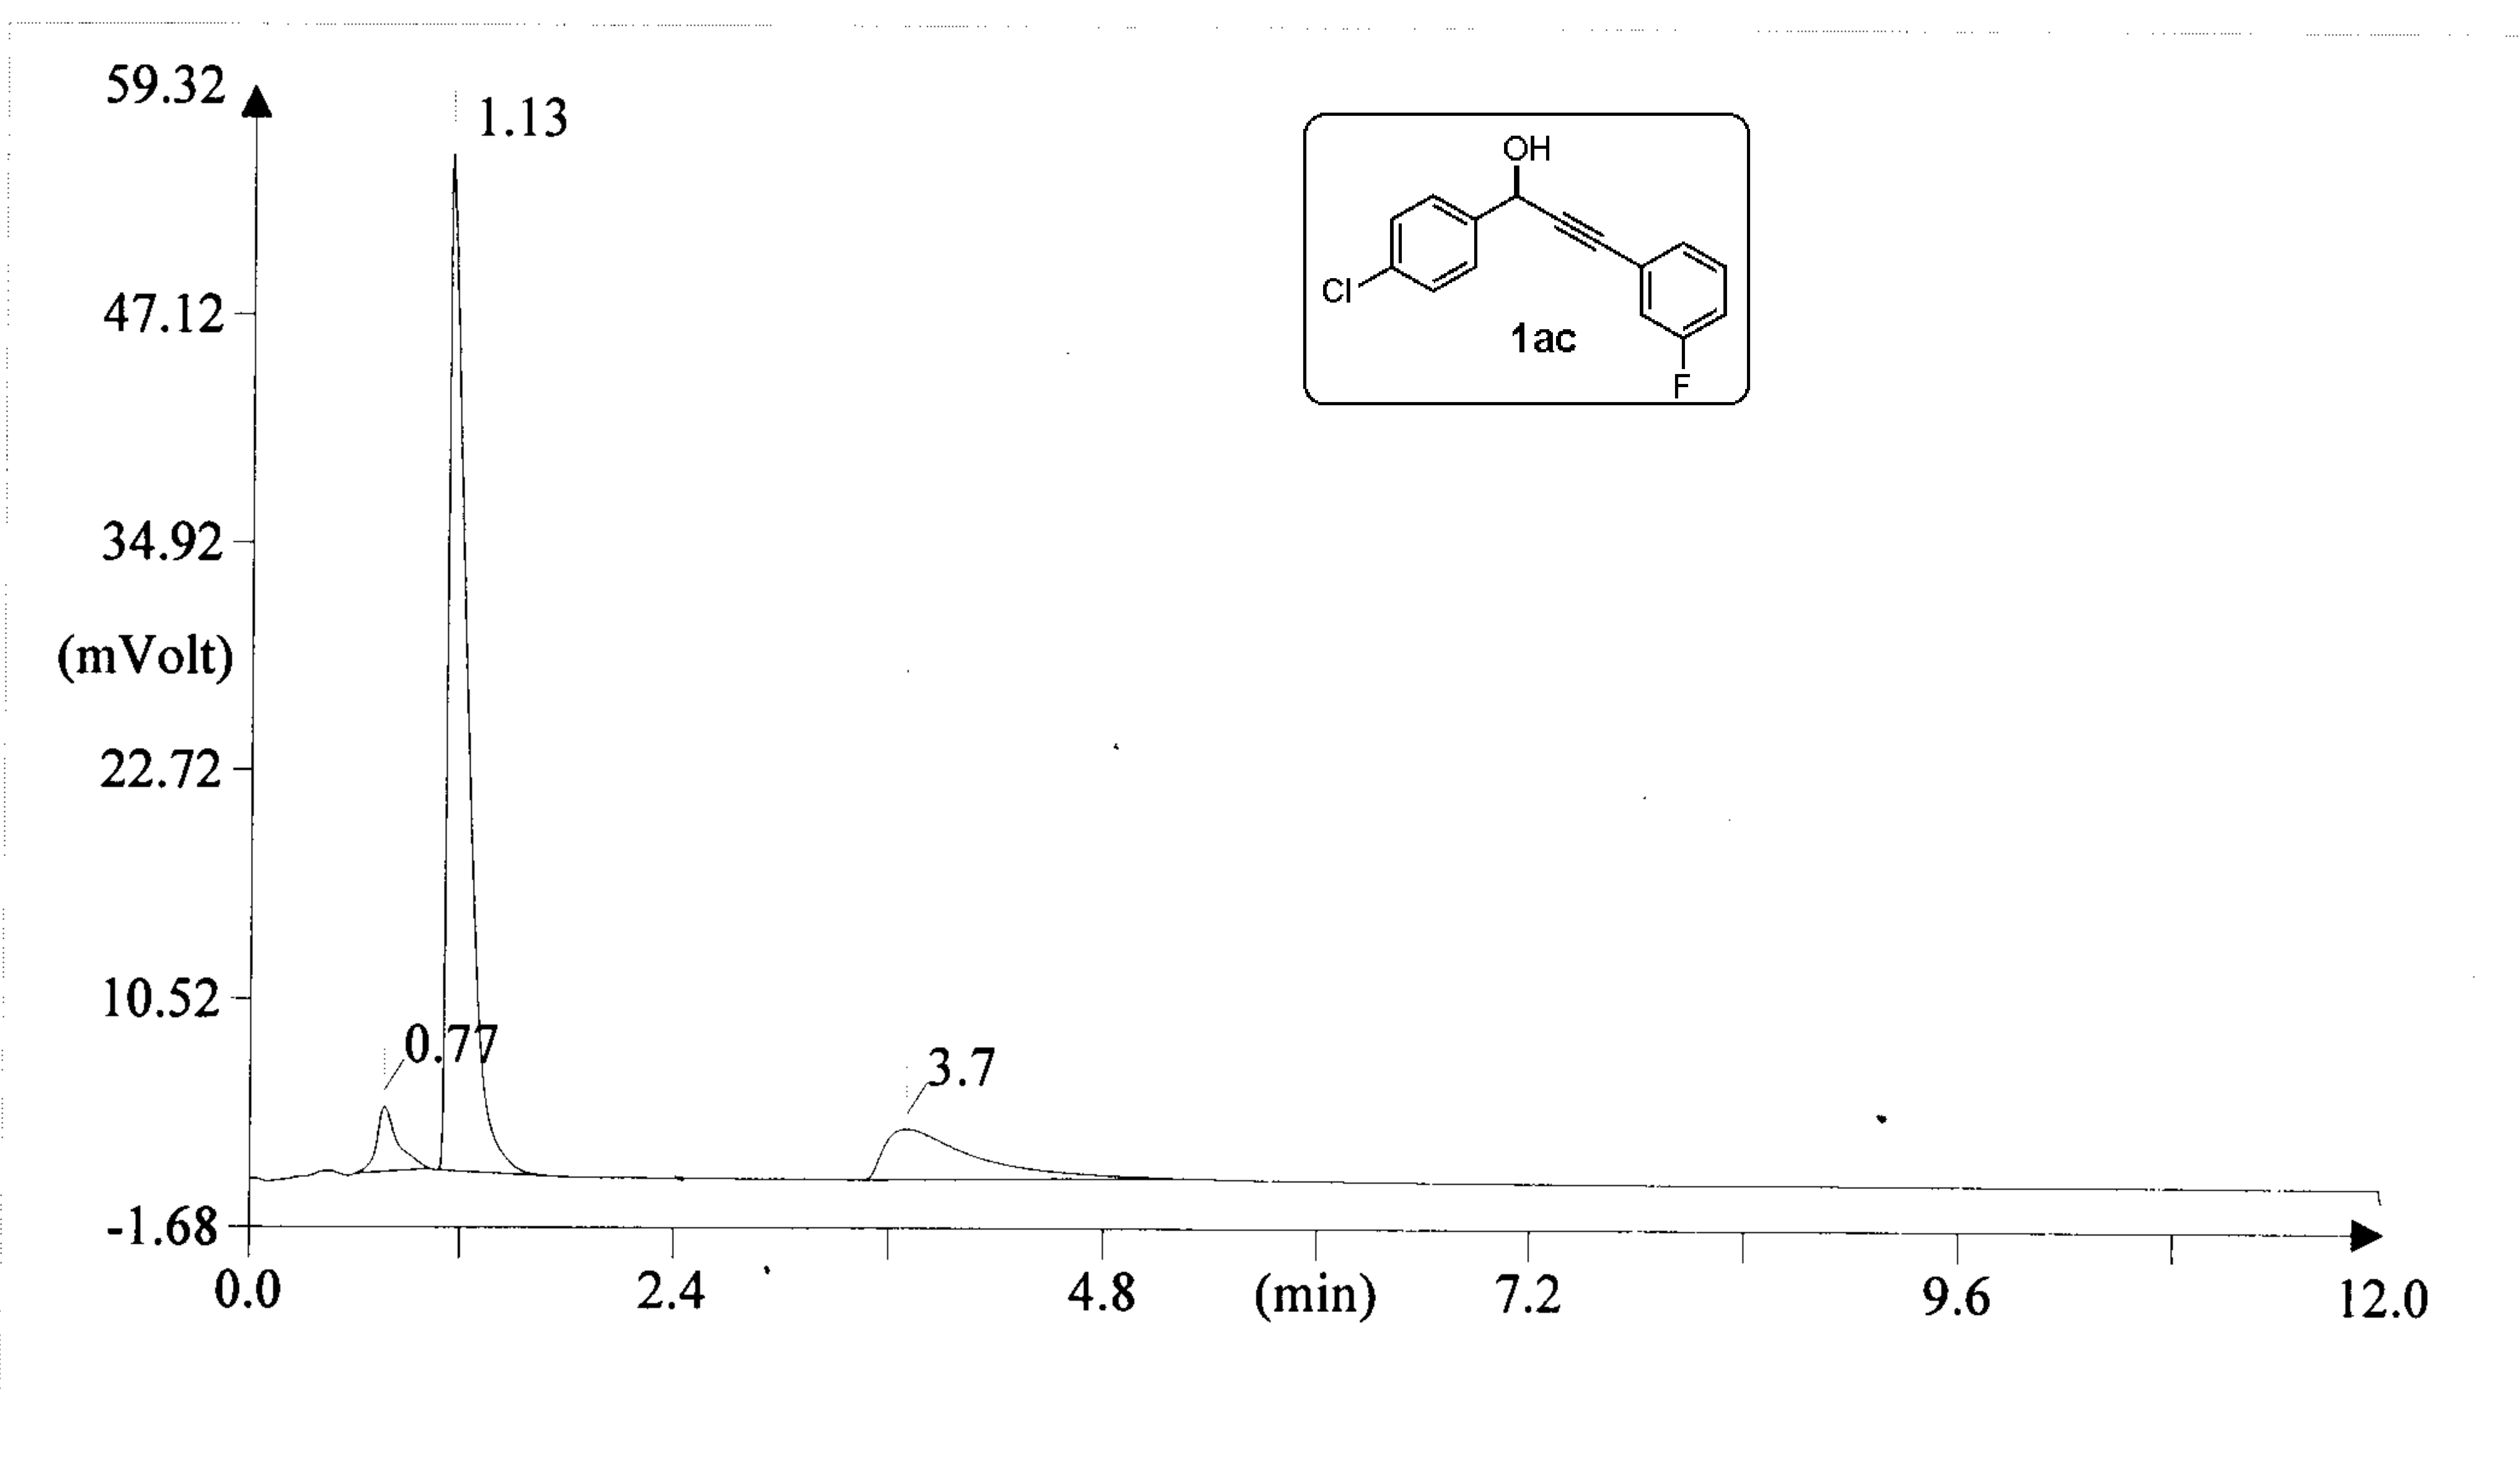

| Element Name | Element % | Ret. Time |
|--------------|-----------|-----------|
| Nitrogen     | 0. 09     | 0. 77     |
| Carbon       | 69. 25    | 1. 13     |
| Hydrogen     | 3. 83     | 3. 70     |

*Handwritten signature*

# FLASH EA 1112 SERIES CHN REPORT

## SCHOOL OF CHEMISTRY

## UNIVERSITY OF HYDERABAD

Method filename: C:\Program Files\Thermo Finnigan\Eager 300 for EA1112\DATA\Sys\_data\_ex  
 Sample ID: MBC-PH-O-PH (# 3)  
 Analysis type: UnkNown  
 Chromatogram filename: UNK-28122010-3.dat  
 Sample weight: 1.108

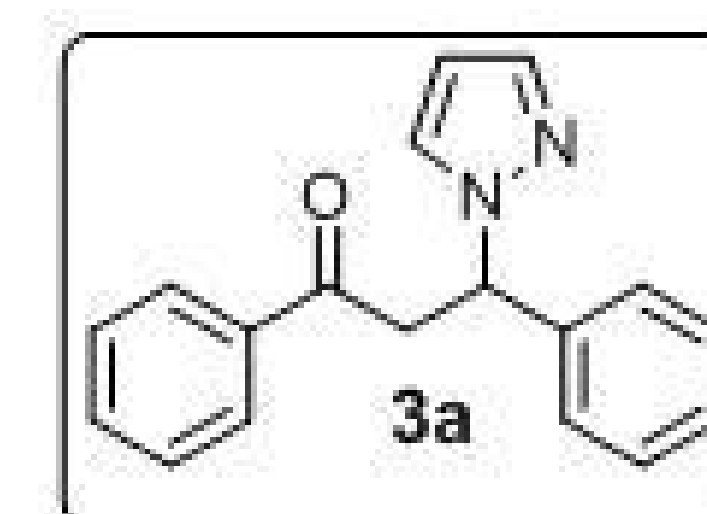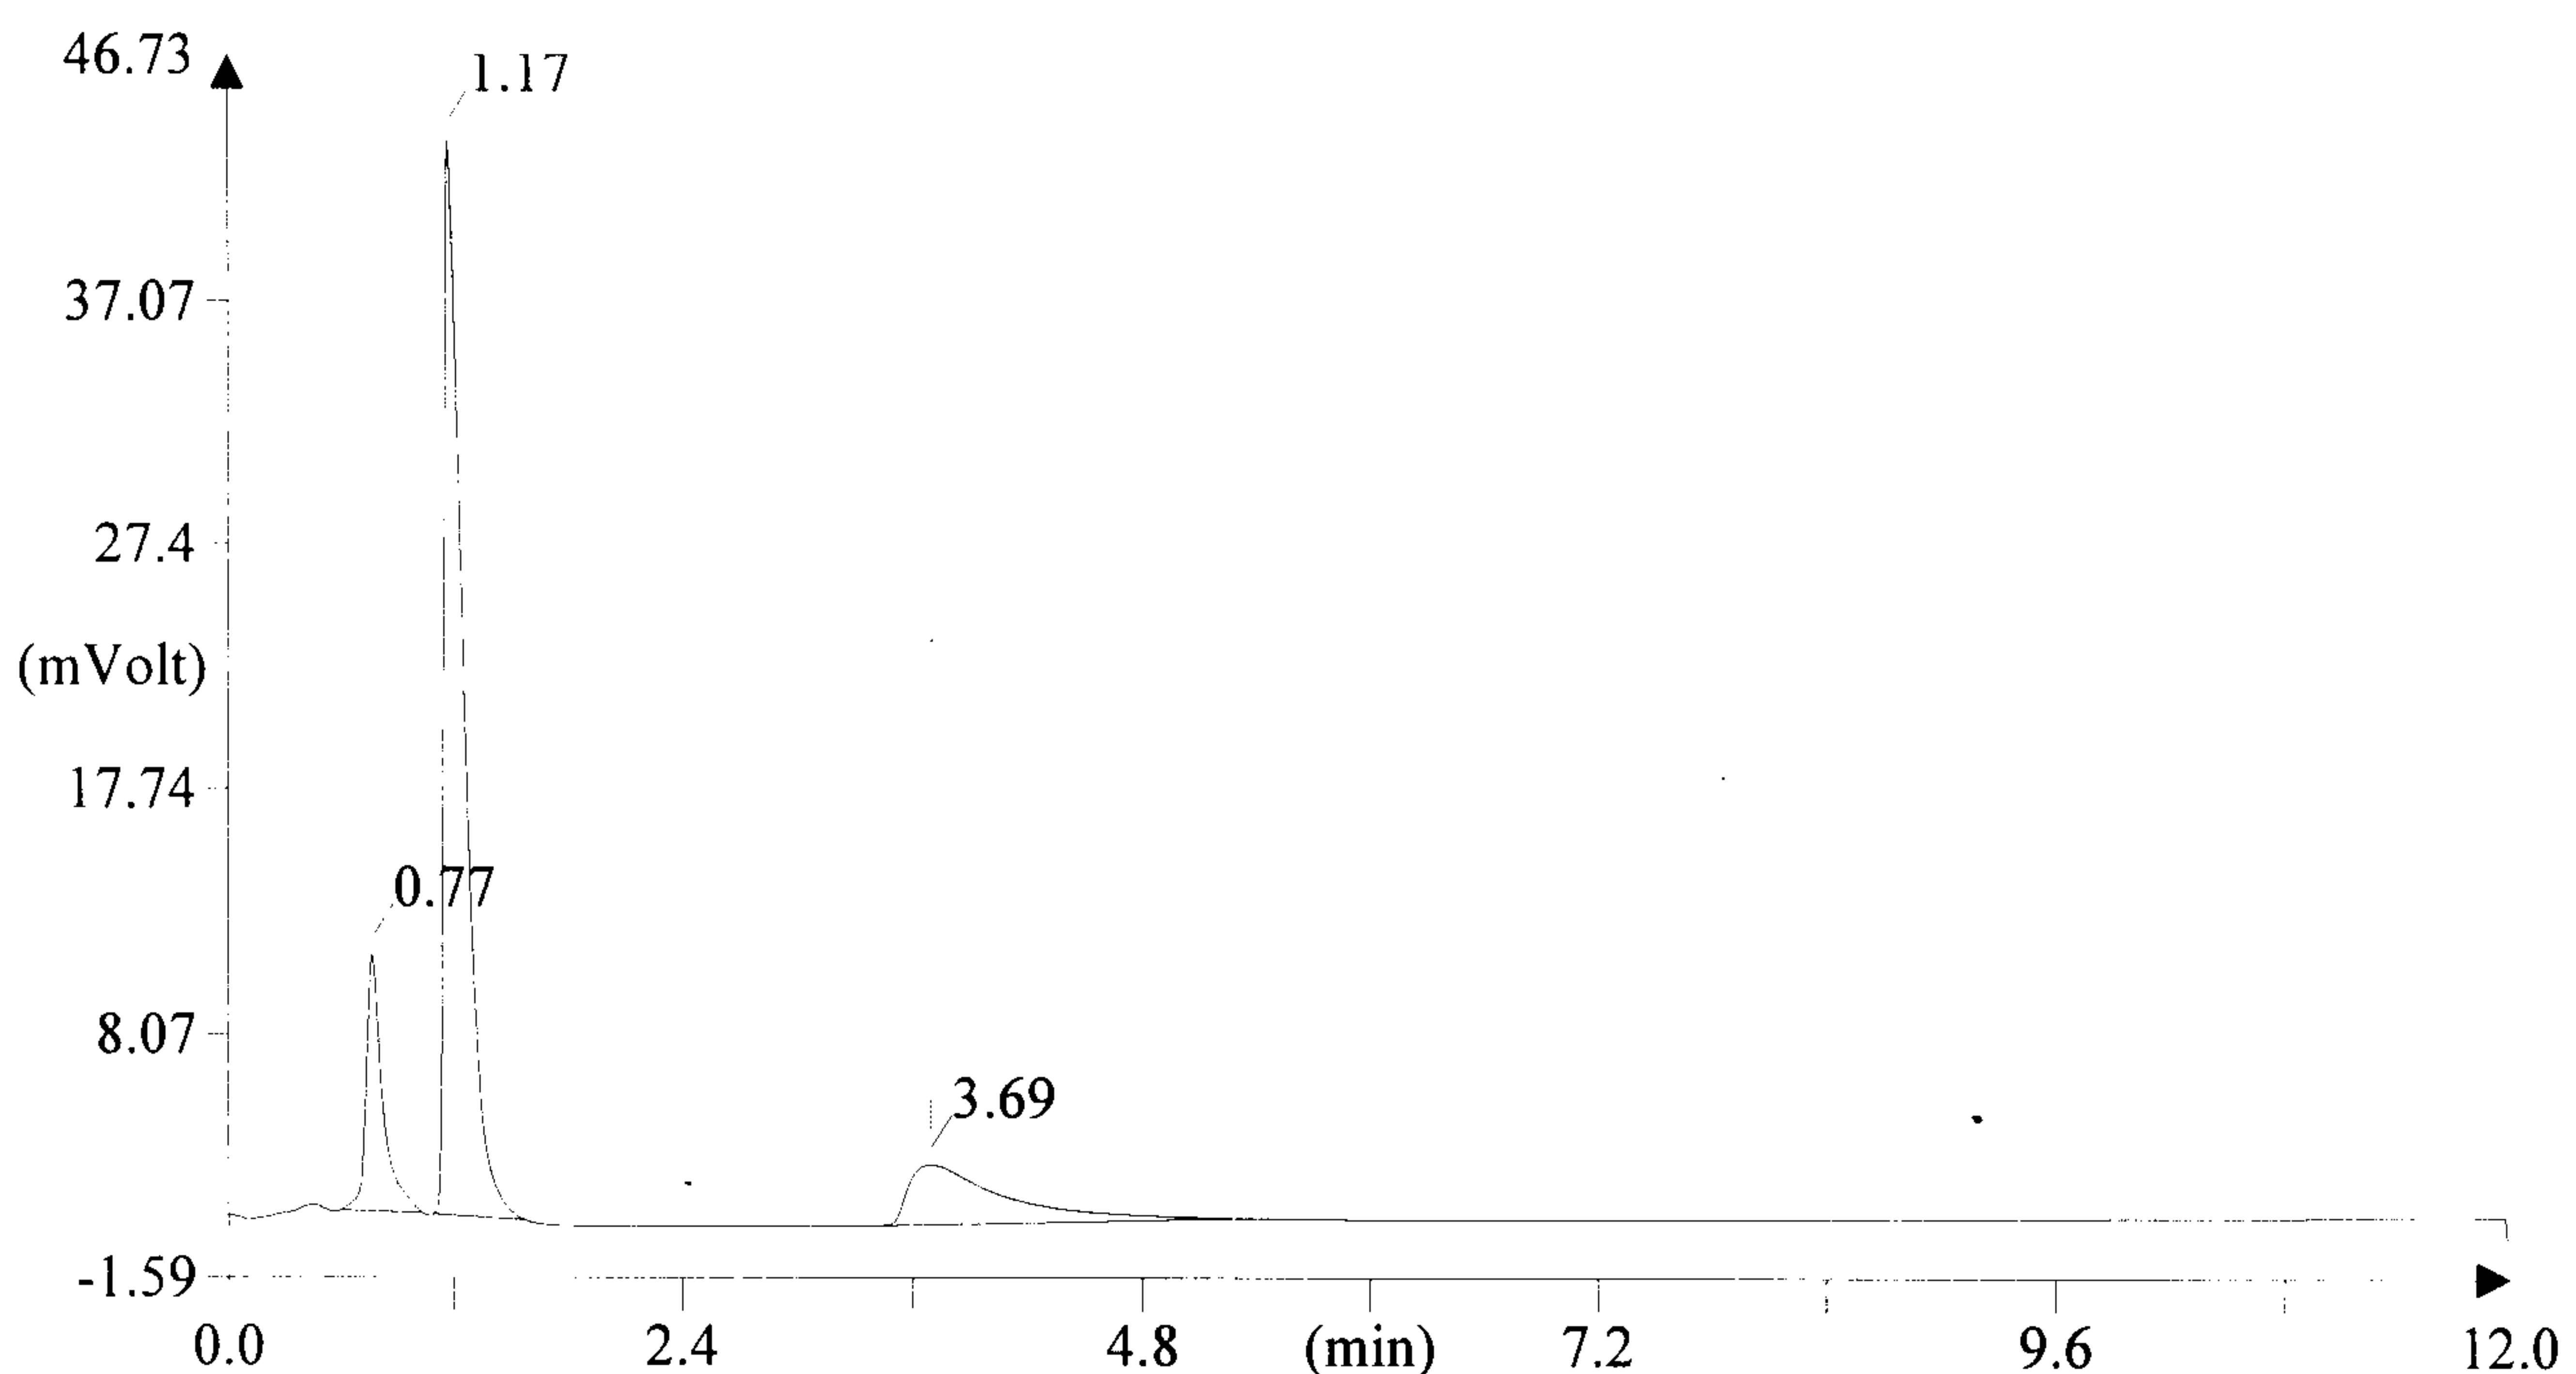

| Element Name | Element % | Ret. Time |
|--------------|-----------|-----------|
| Nitrogen     | 10. 25    | 0. 77     |
| Carbon       | 78. 09    | 1. 17     |
| Hydrogen     | 5. 76     | 3. 69     |

*(Signature)*

# FLASH EA 1112 SERIES CHN REPORT

## SCHOOL OF CHEMISTRY

## UNIVERSITY OF HYDERABAD

Method filename: I:\Program Files\Thermo Finnigan\Eager 300 for EA1112\DATA\Sys\_data\_exa  
 Sample ID: MBC-11-19 (# 97)  
 Analysis type: UnkNown  
 Chromatogram filename: UNK-21122010-7.dat  
 Sample weight: 1.007

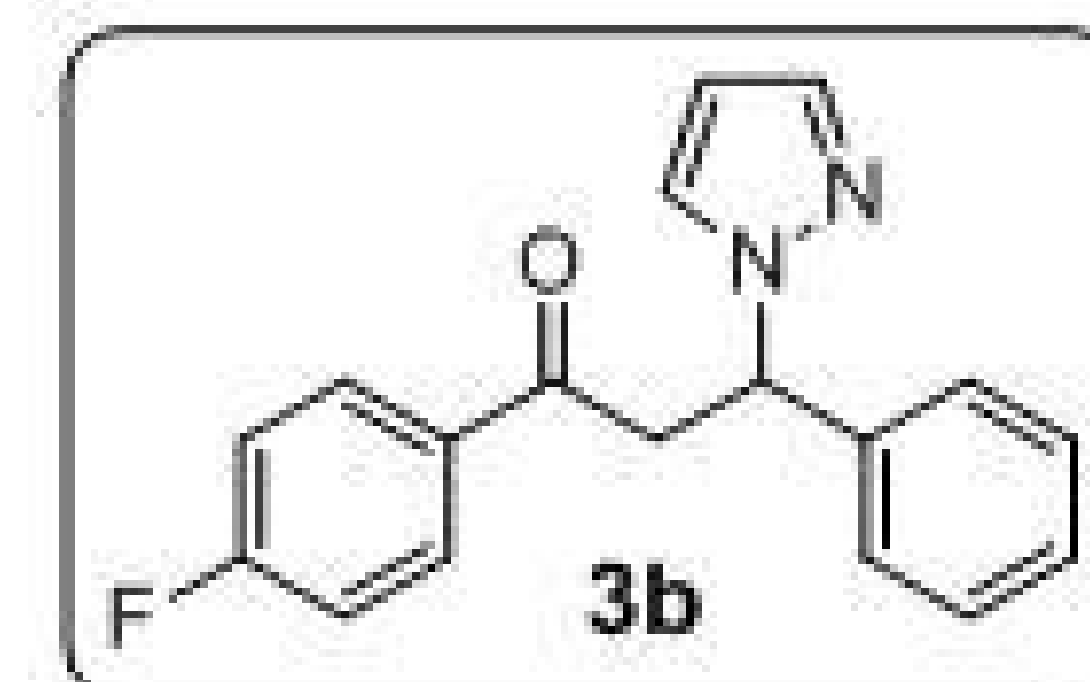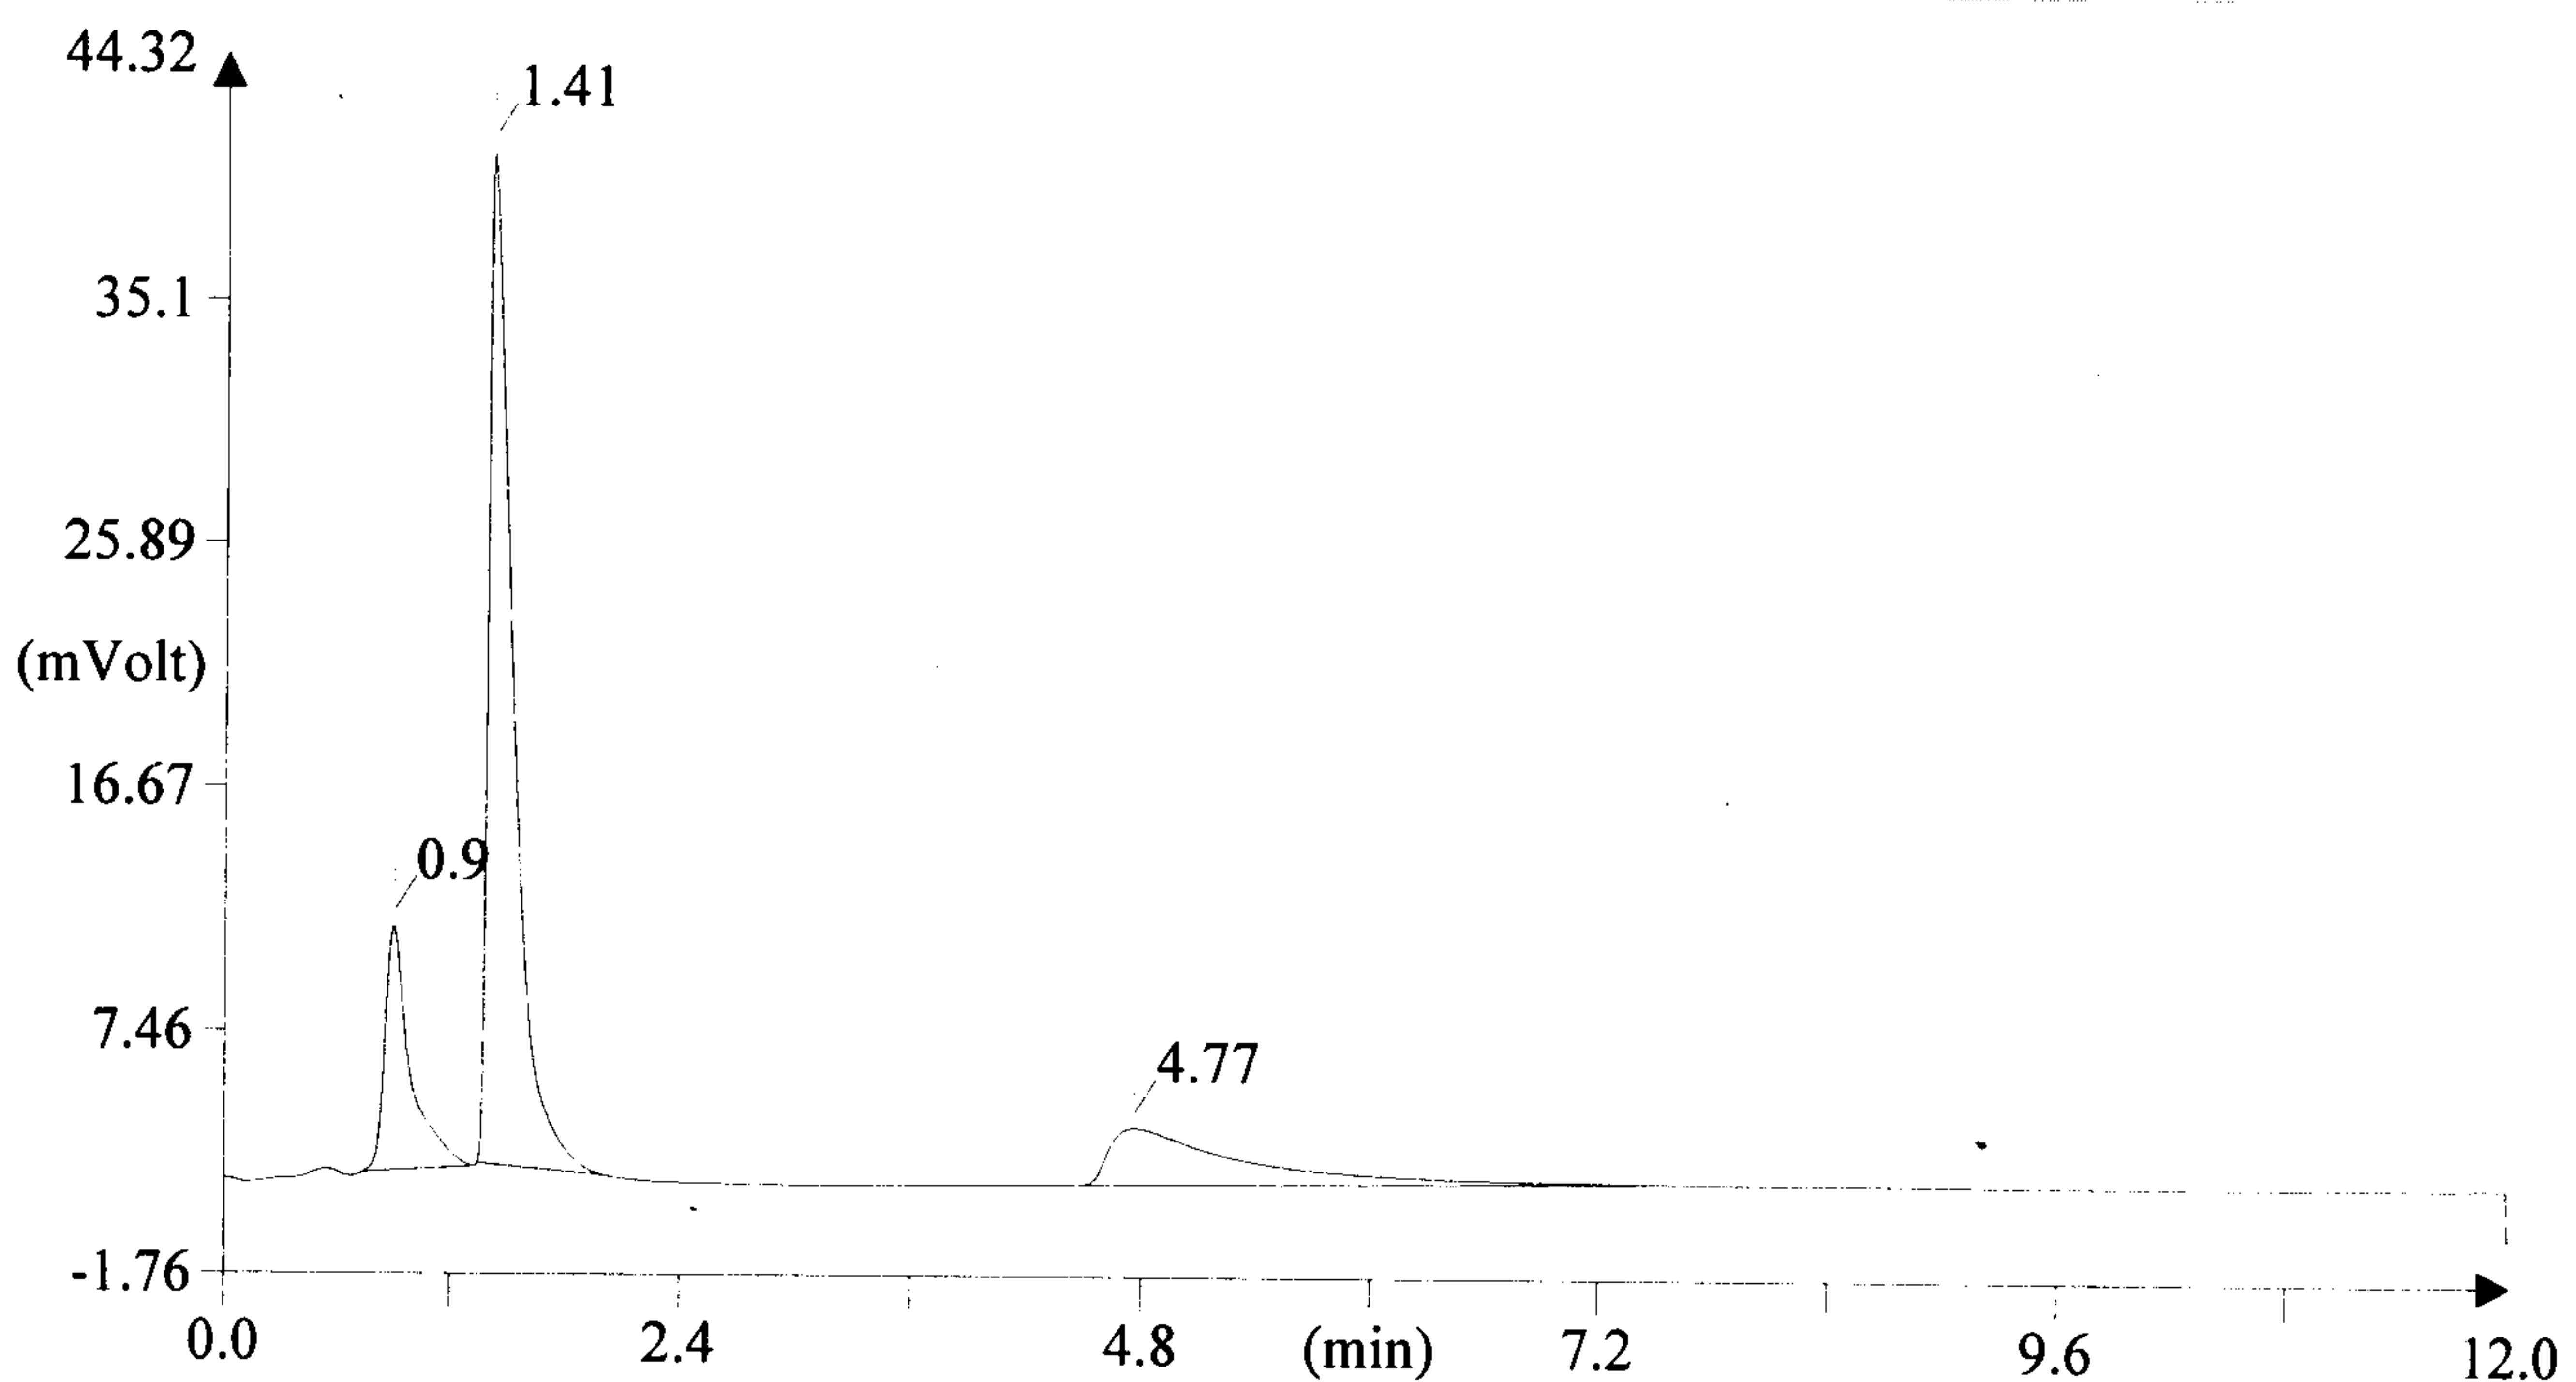

| Element Name | Element % | Ret. Time |
|--------------|-----------|-----------|
| Nitrogen     | 9.66      | 0.90      |
| Carbon       | 73.35     | 1.41      |
| Hydrogen     | 5.21      | 4.77      |

*BL*



# FLASH EA 1112 SERIES CHN REPORT

## SCHOOL OF CHEMISTRY

## UNIVERSITY OF HYDERABAD

Method filename: C:\Program Files\Thermo Finnigan\Eager 300 for EA1112\DATA\Sys\_data\_ex  
 Sample ID: MBC-11-5 (# 1)  
 Analysis type: UnkNown  
 Chromatogram filename: UNK-28122010-1.dat  
 Sample weight: 1.113

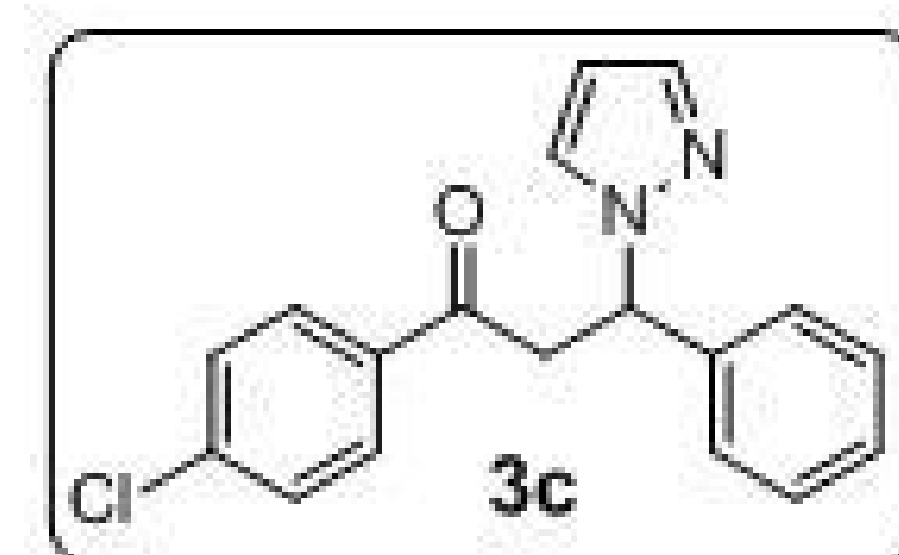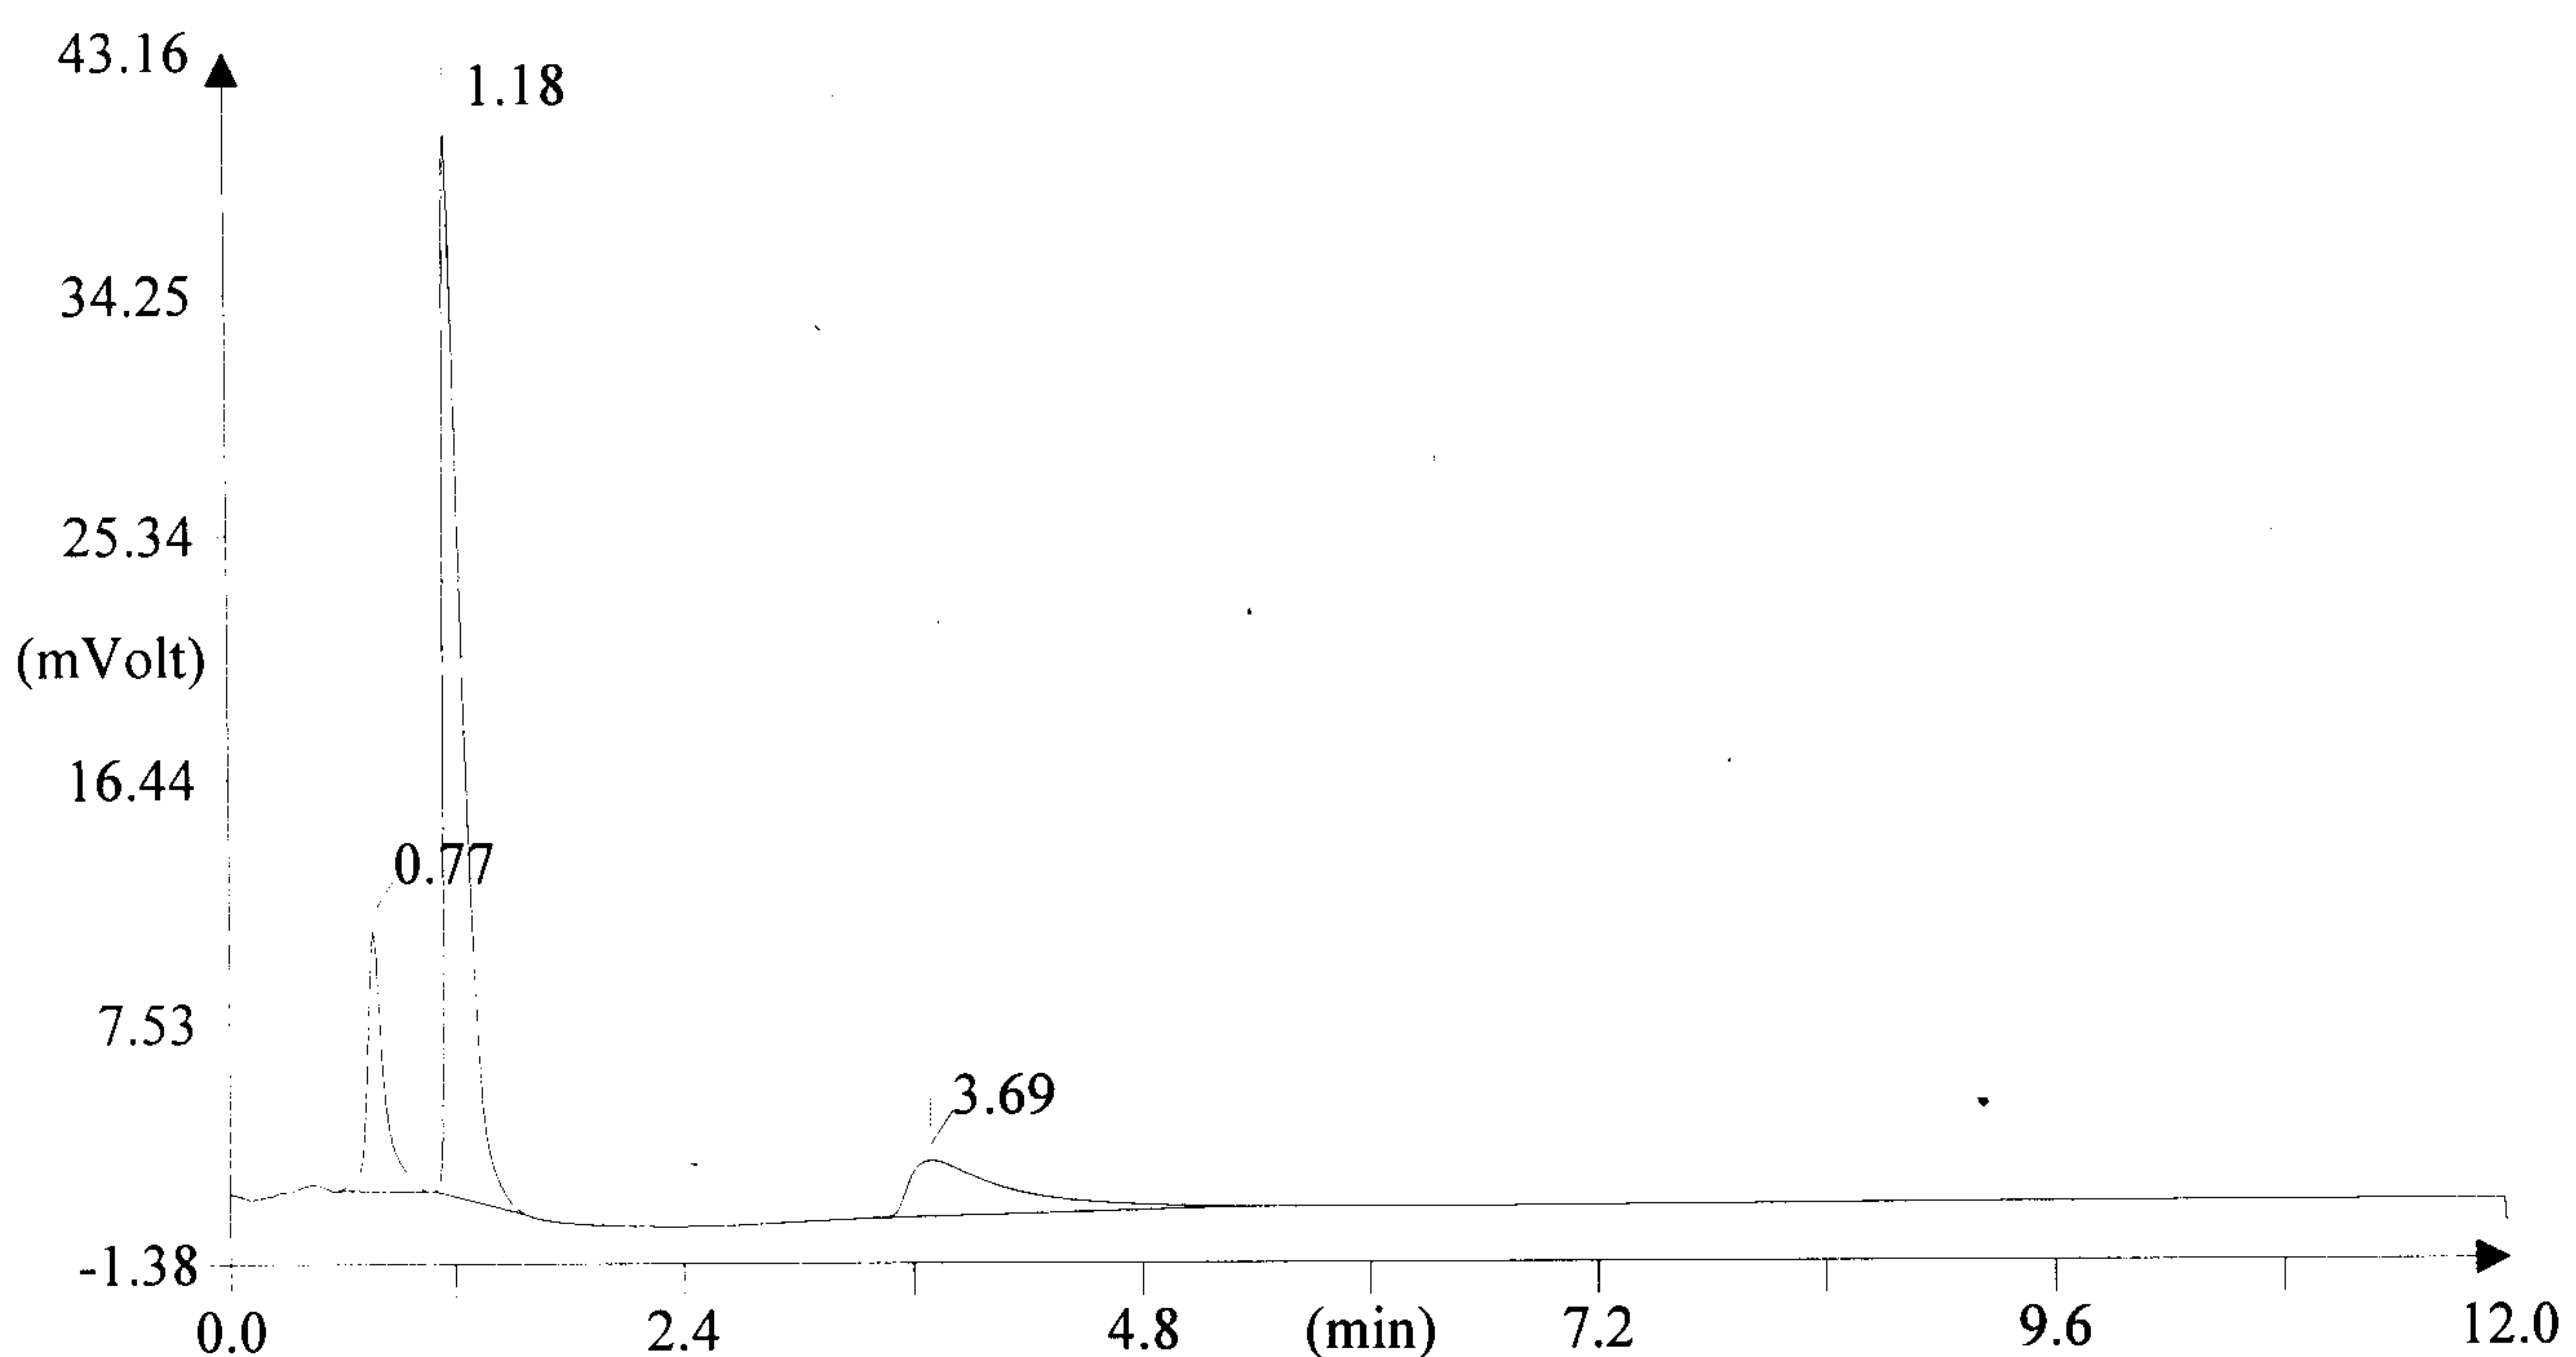

| Element Name | Element % | Ret. Time |
|--------------|-----------|-----------|
| Nitrogen     | 9.12      | 0.77      |
| Carbon       | 69.37     | 1.18      |
| Hydrogen     | 4.81      | 3.69      |

*Signature*

# FLASH EA 1112 SERIES CHN REPORT

## SCHOOL OF CHEMISTRY

## UNIVERSITY OF HYDERABAD

Method filename: I:\Program Files\Thermo Finnigan\Eager 300 for EA1112\DATA\Sys\_data\_exa  
Sample ID: MBC-11-8-T2 (# 26)  
Analysis type: UnkNown  
Chromatogram filename: UNK-11032011-26.dat  
Sample weight: 1.132

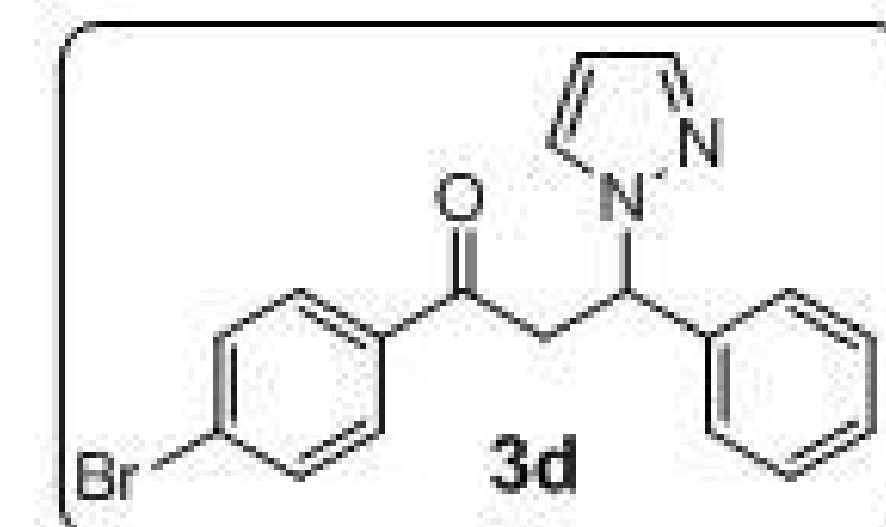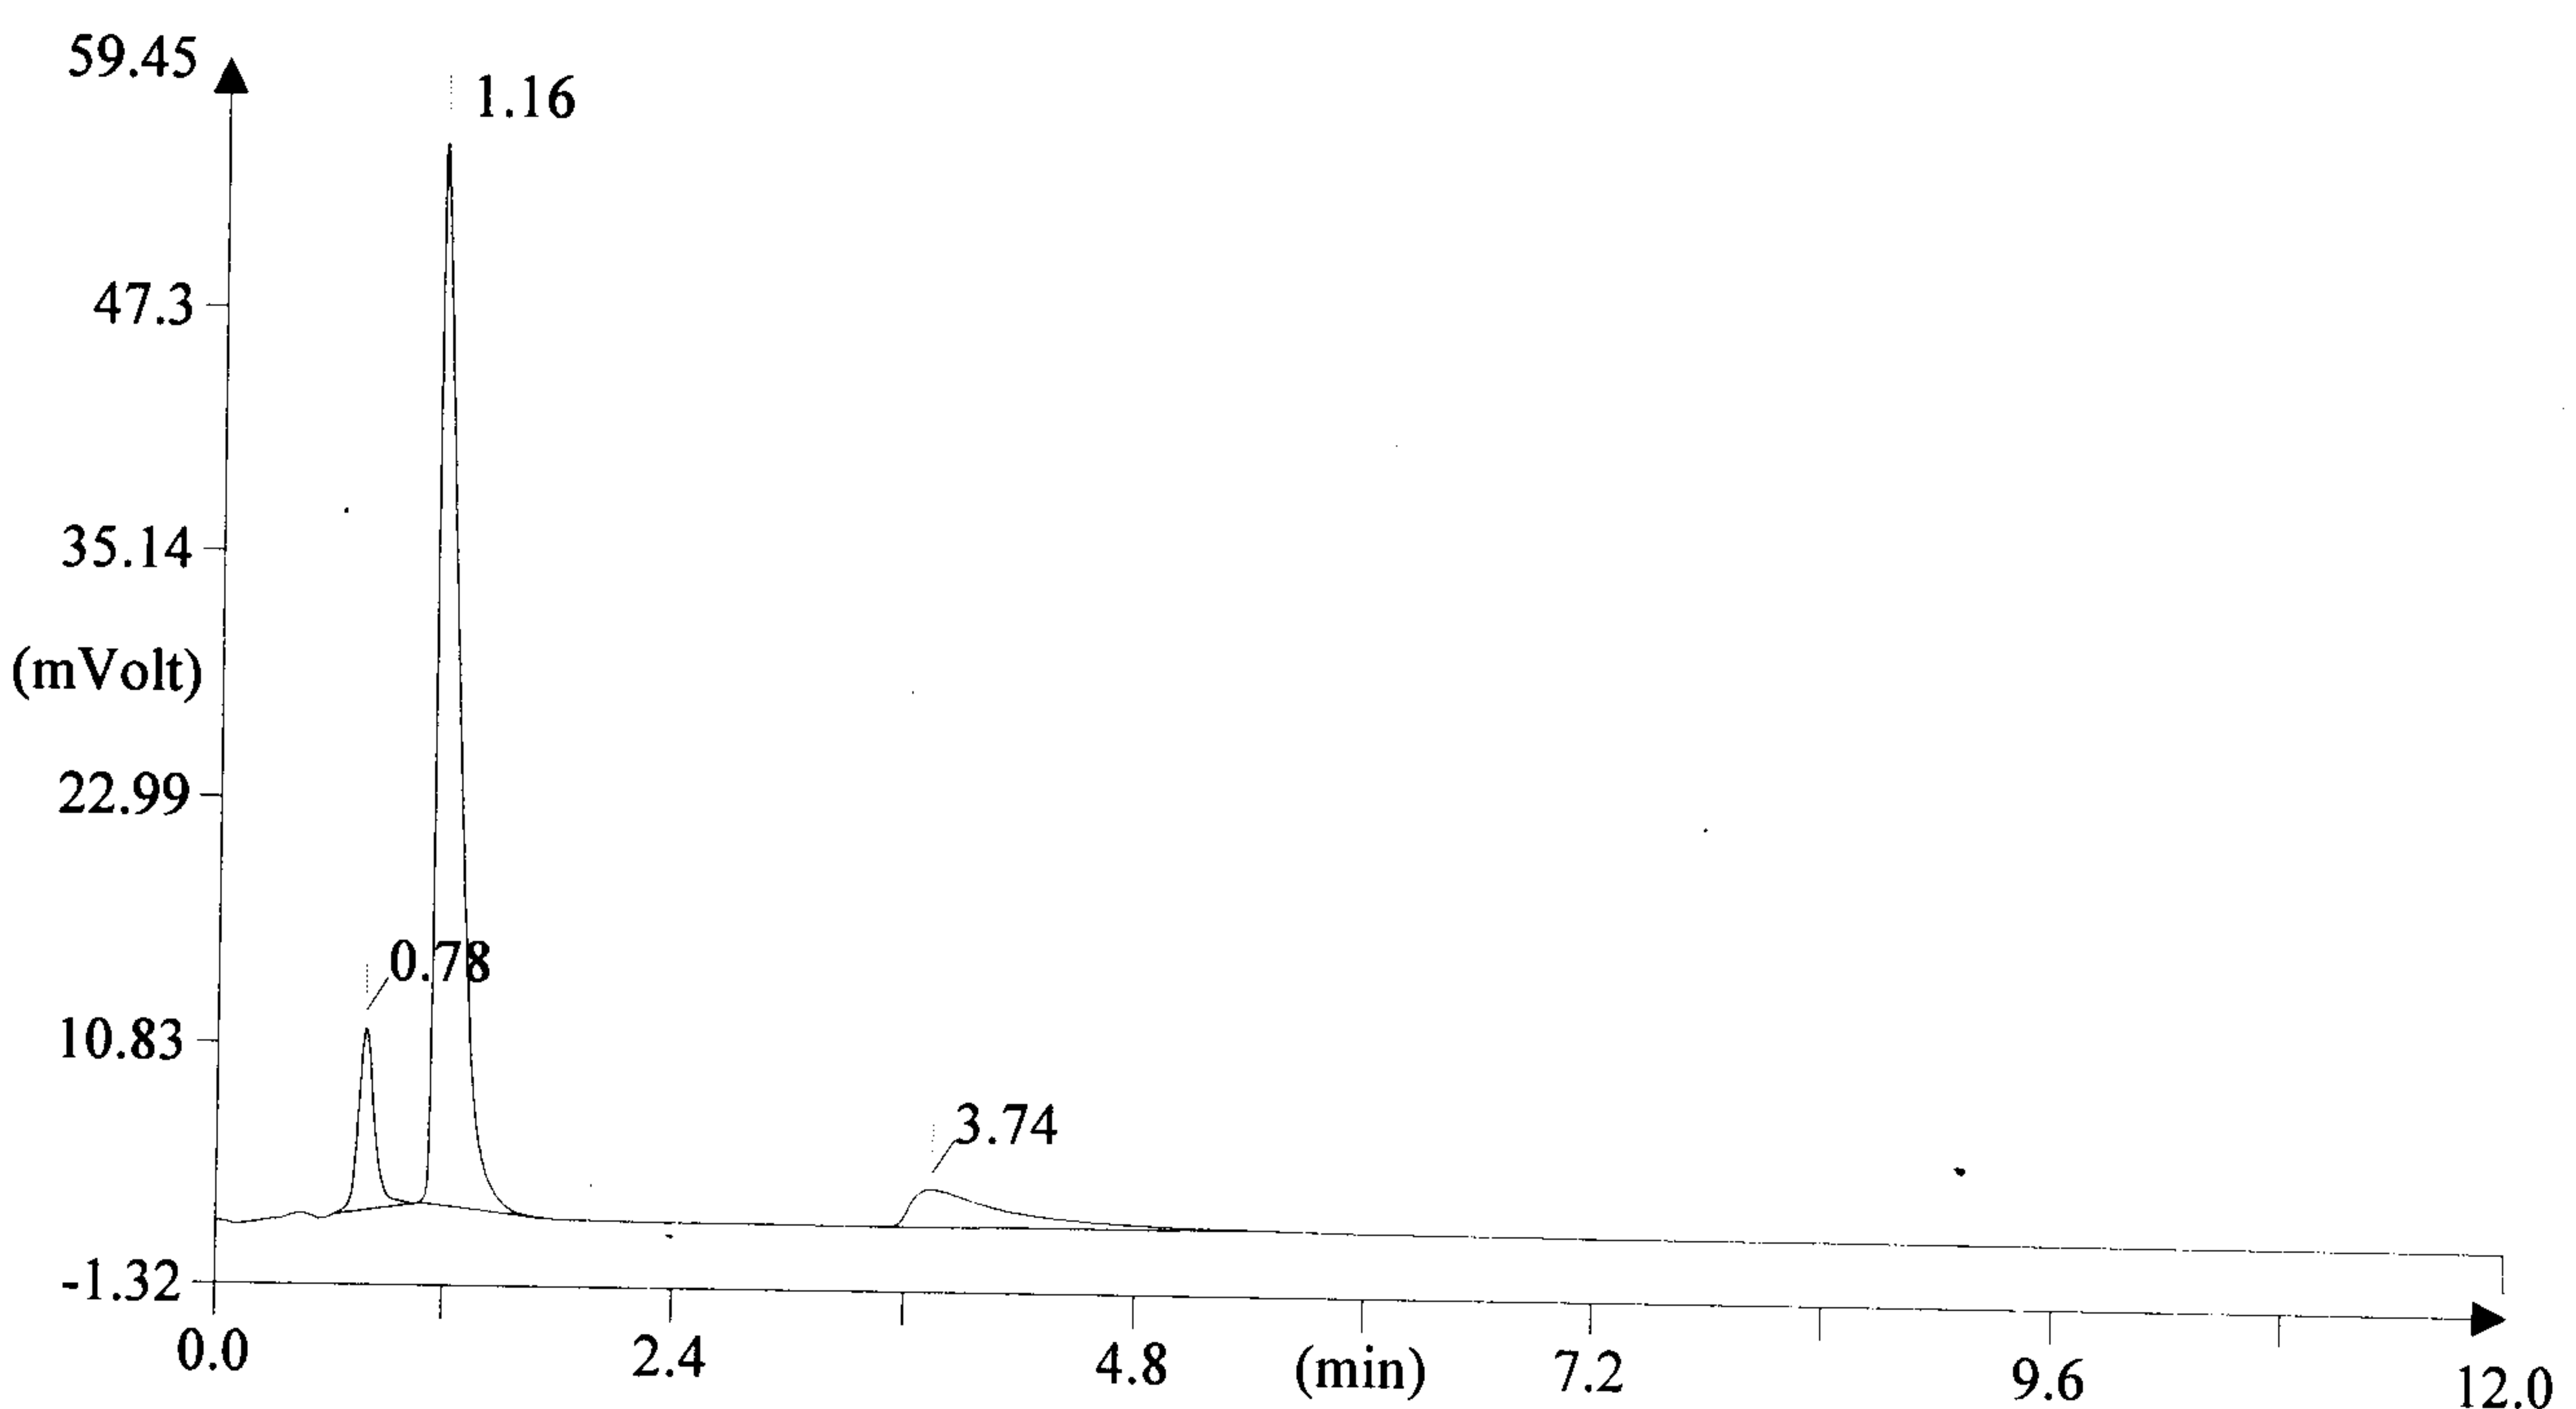

| Element Name | Element % | Ret. Time |
|--------------|-----------|-----------|
| Nitrogen     | 7.79      | 0.78      |
| Carbon       | 60.75     | 1.16      |
| Hydrogen     | 4.31      | 3.74      |

OB

# FLASH EA 1112 SERIES CHN REPORT

## SCHOOL OF CHEMISTRY

## UNIVERSITY OF HYDERABAD

Method filename: I:\Program Files\Thermo Finnigan\Eager 300 for EA1112\DATA\Sys\_data\_exa  
 Sample ID: MBC-11-61 (# 2)  
 Analysis type: UnkNown  
 Chromatogram filename: UNK-06042011-2.dat  
 Sample weight: 1.121

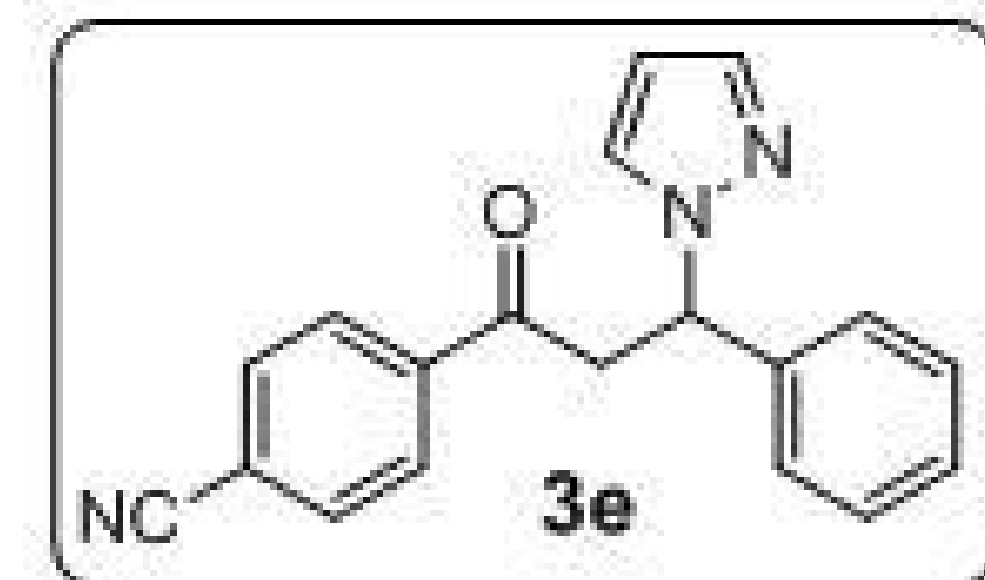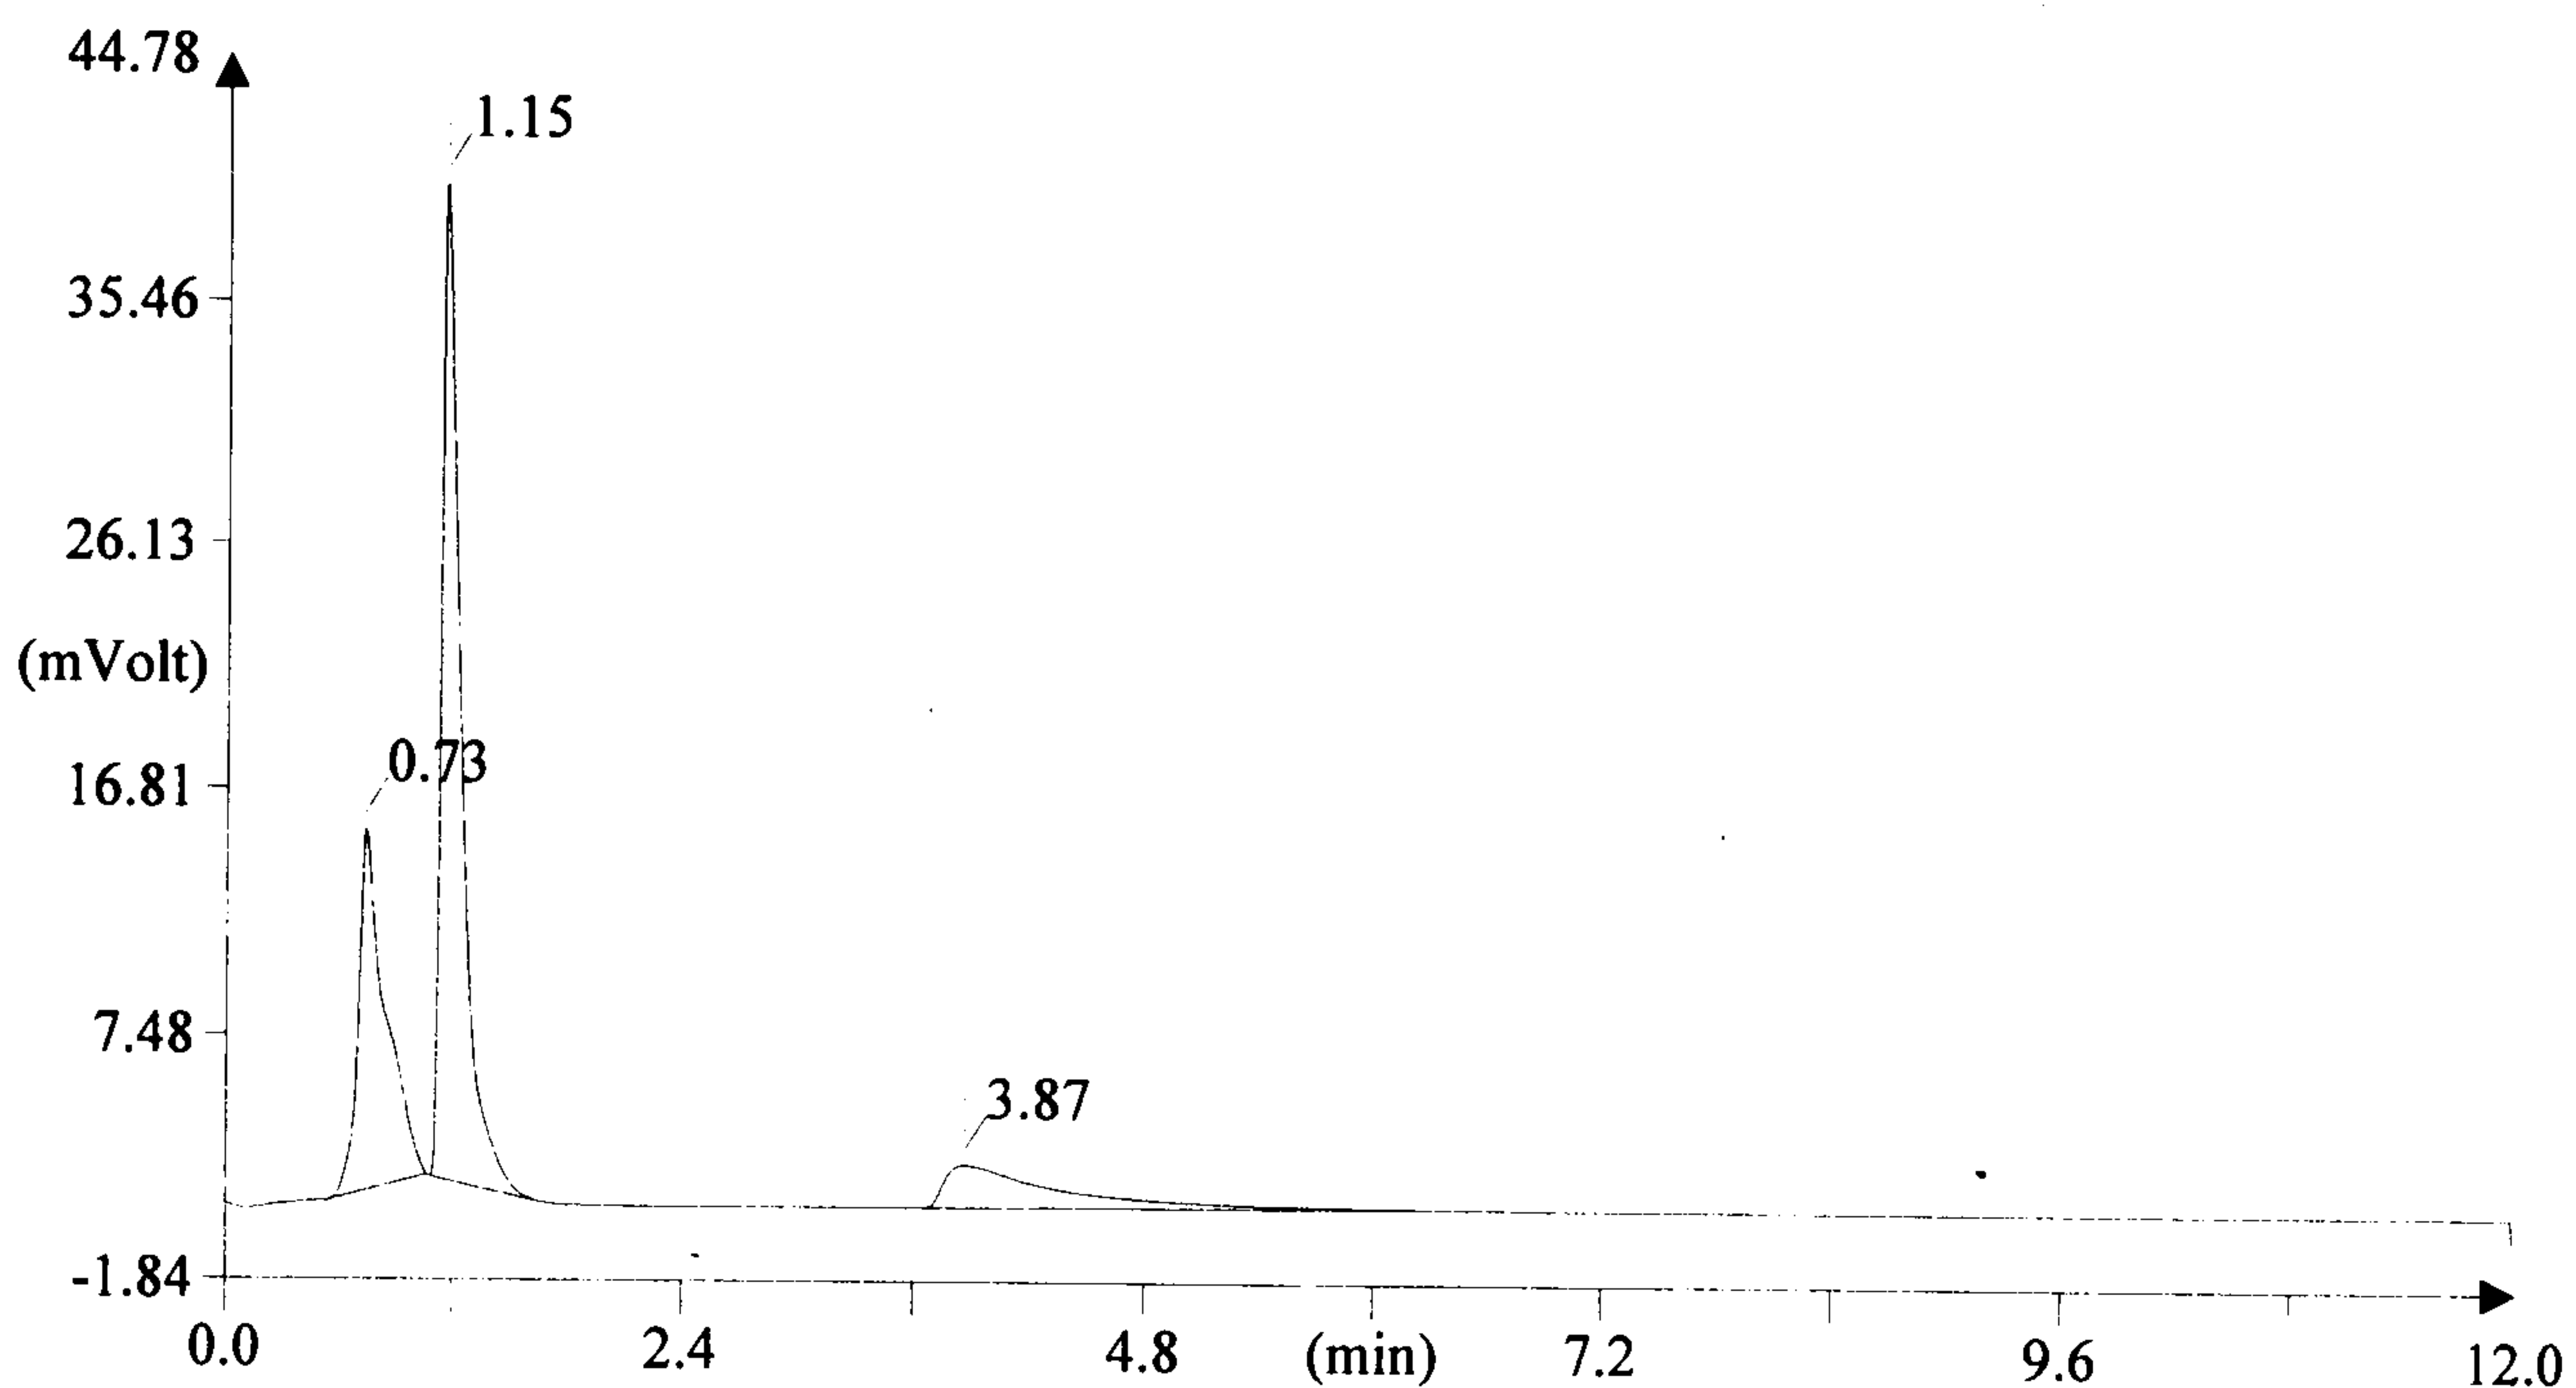

| Element Name | Element % | Ret. Time |
|--------------|-----------|-----------|
| Nitrogen     | 13. 86    | 0. 73     |
| Carbon       | 75. 61    | 1. 15     |
| Hydrogen     | 5. 10     | 3. 87     |

*Handwritten signature*



# FLASH EA 1112 SERIES CHN REPORT

## SCHOOL OF CHEMISTRY

## UNIVERSITY OF HYDERABAD

Method filename: I:\Program Files\Thermo Finnigan\Eager 300 for EA1112\DATA\Sys\_data\_exa  
Sample ID: MBC-11-13-T2 (# 12)  
Analysis type: UnkNown  
Chromatogram filename: UNK-28022011-12.dat  
Sample weight: .986

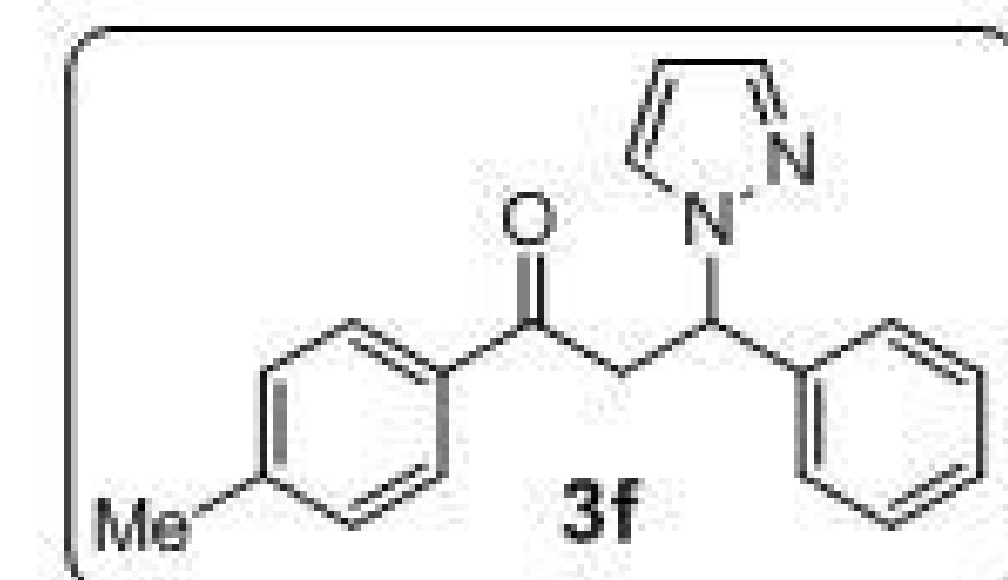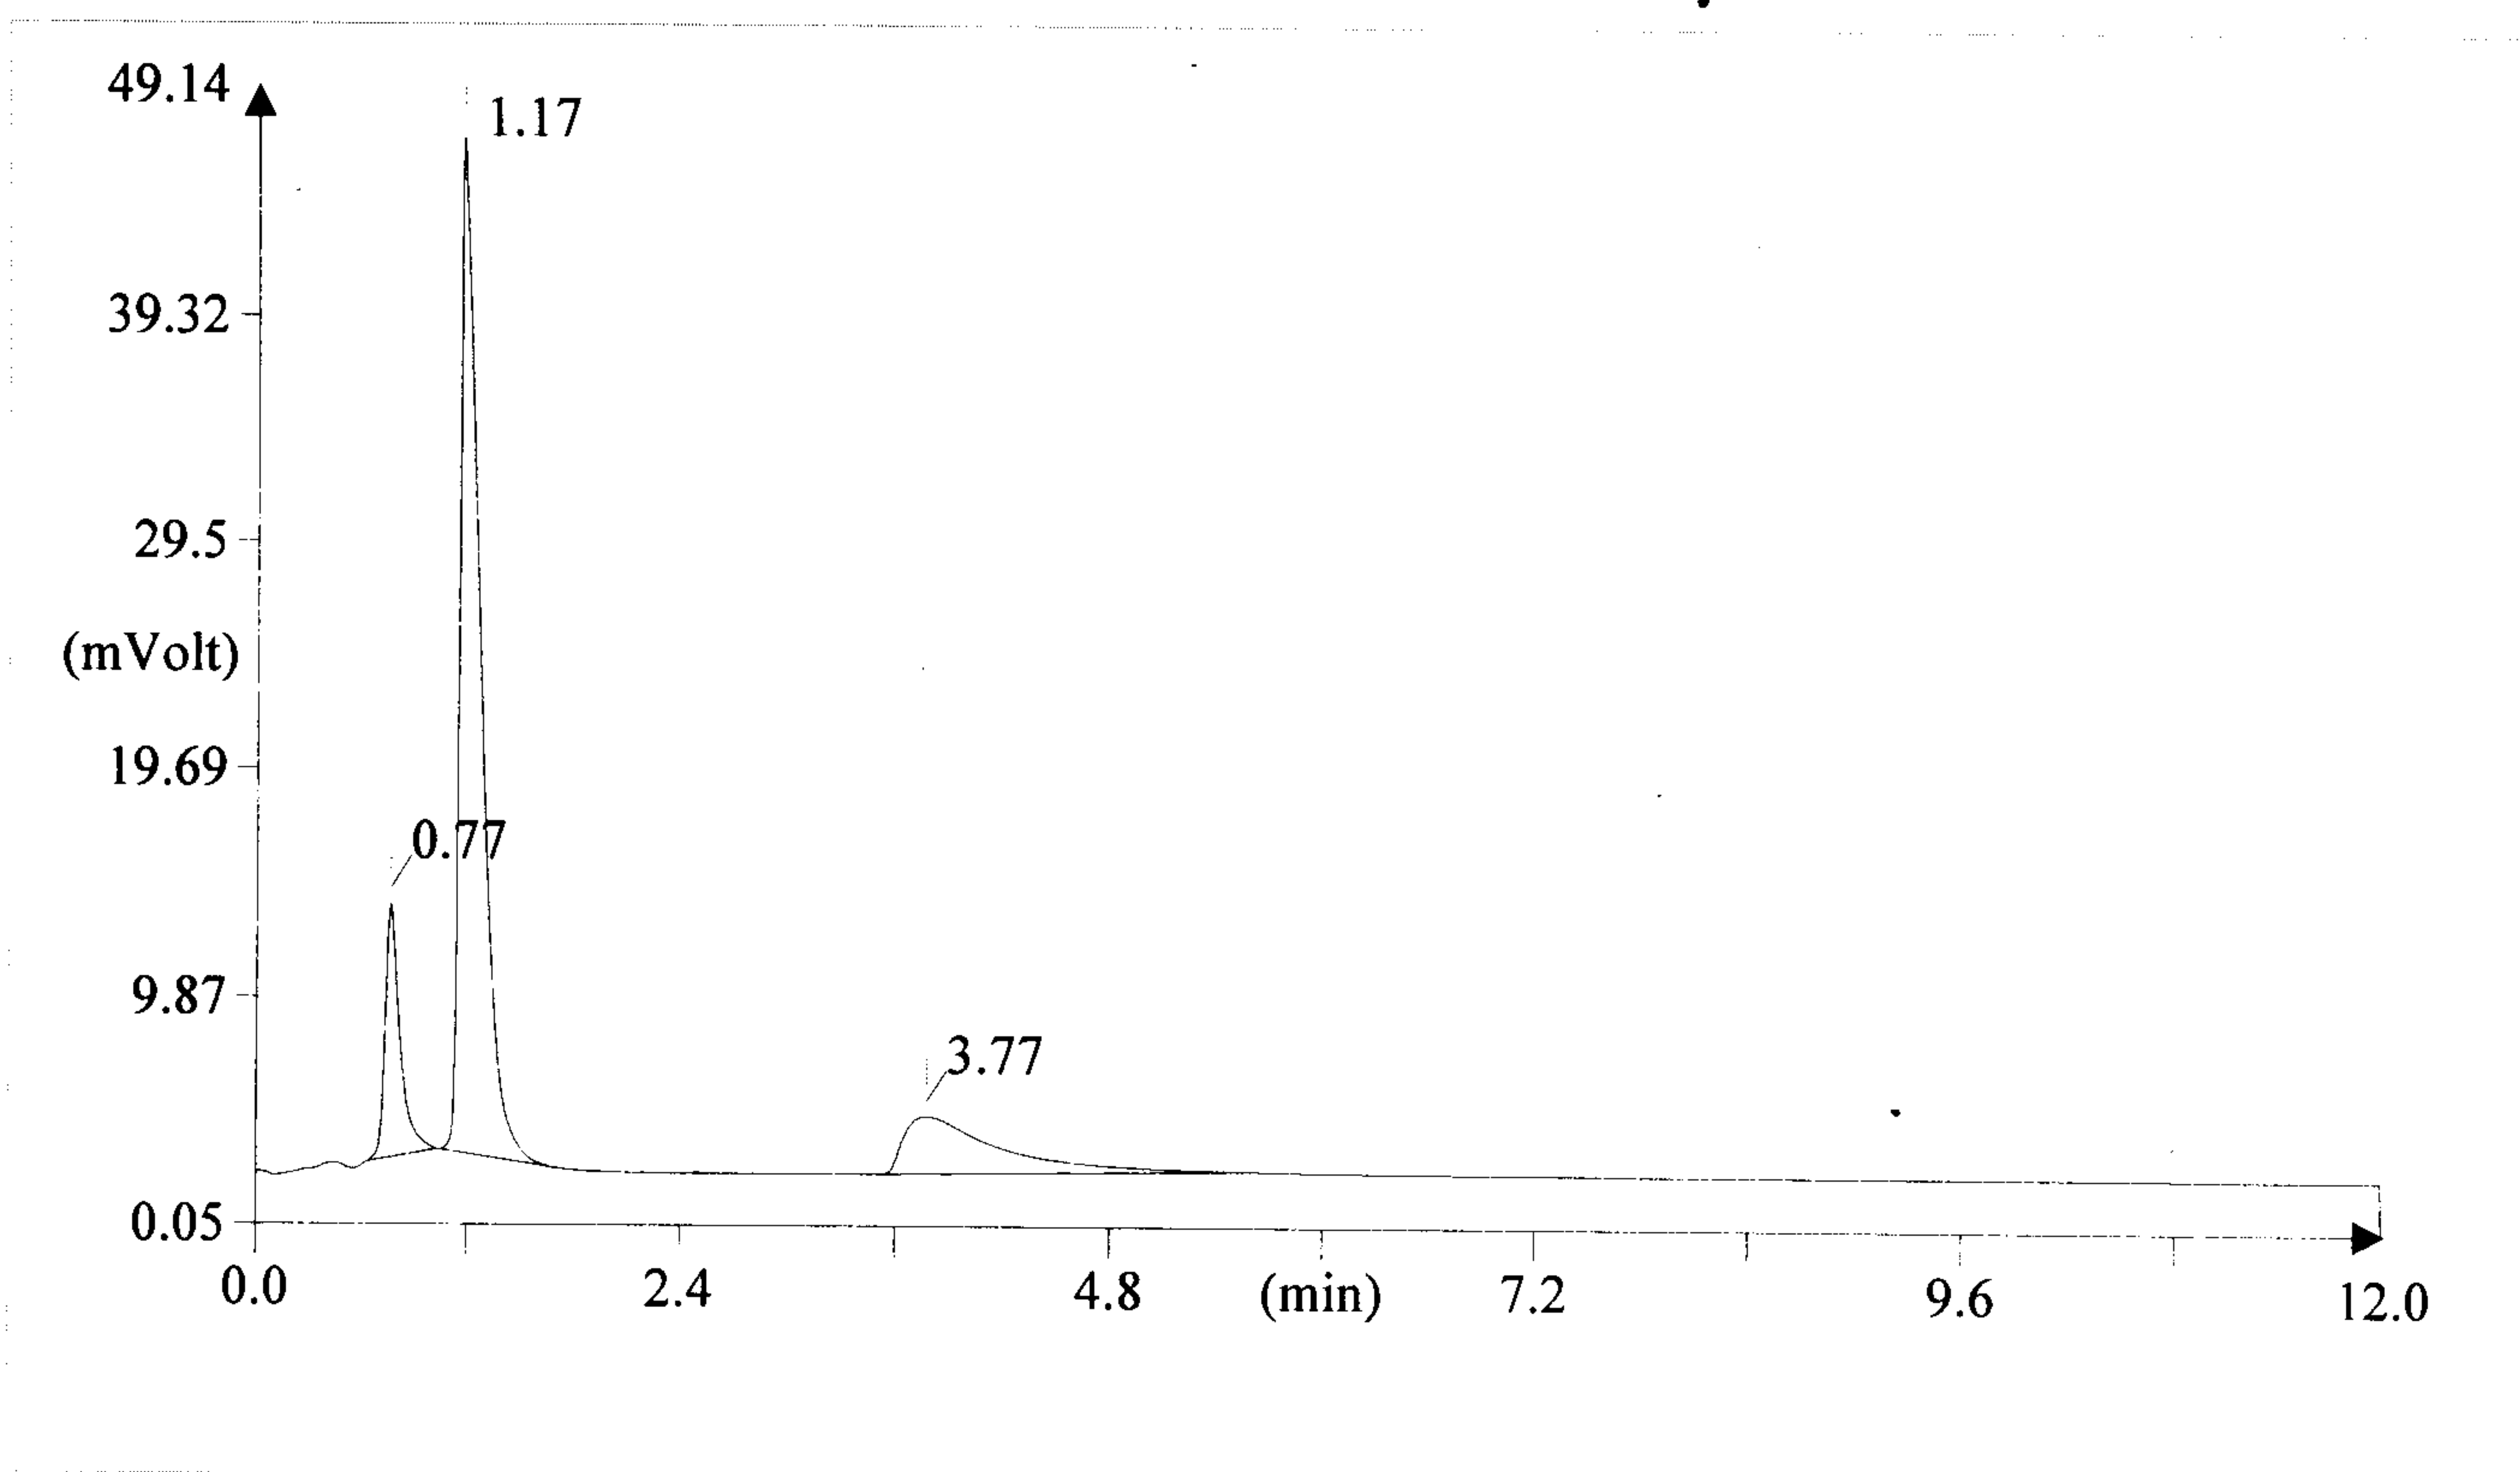

| Element Name | Element % | Ret. Time |
|--------------|-----------|-----------|
| Nitrogen     | 9.55      | 0.77      |
| Carbon       | 78.47     | 1.17      |
| Hydrogen     | 6.32      | 3.77      |

*086*



# FLASH EA 1112 SERIES CHN REPORT

## SCHOOL OF CHEMISTRY

## UNIVERSITY OF HYDERABAD

Method filename: I:\Program Files\Thermo Finnigan\Eager 300 for EA1112\DATA\Sys\_data\_exa  
 Sample ID: MBC-11-9-T1 (# 25)  
 Analysis type: UnkNown  
 Chromatogram filename: UNK-11032011-25.dat  
 Sample weight: .978

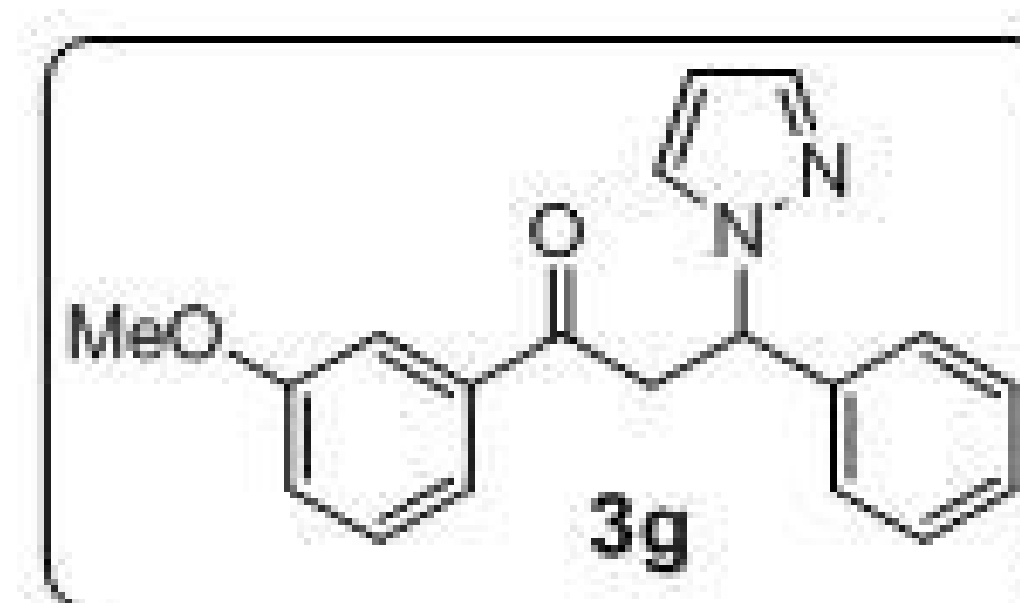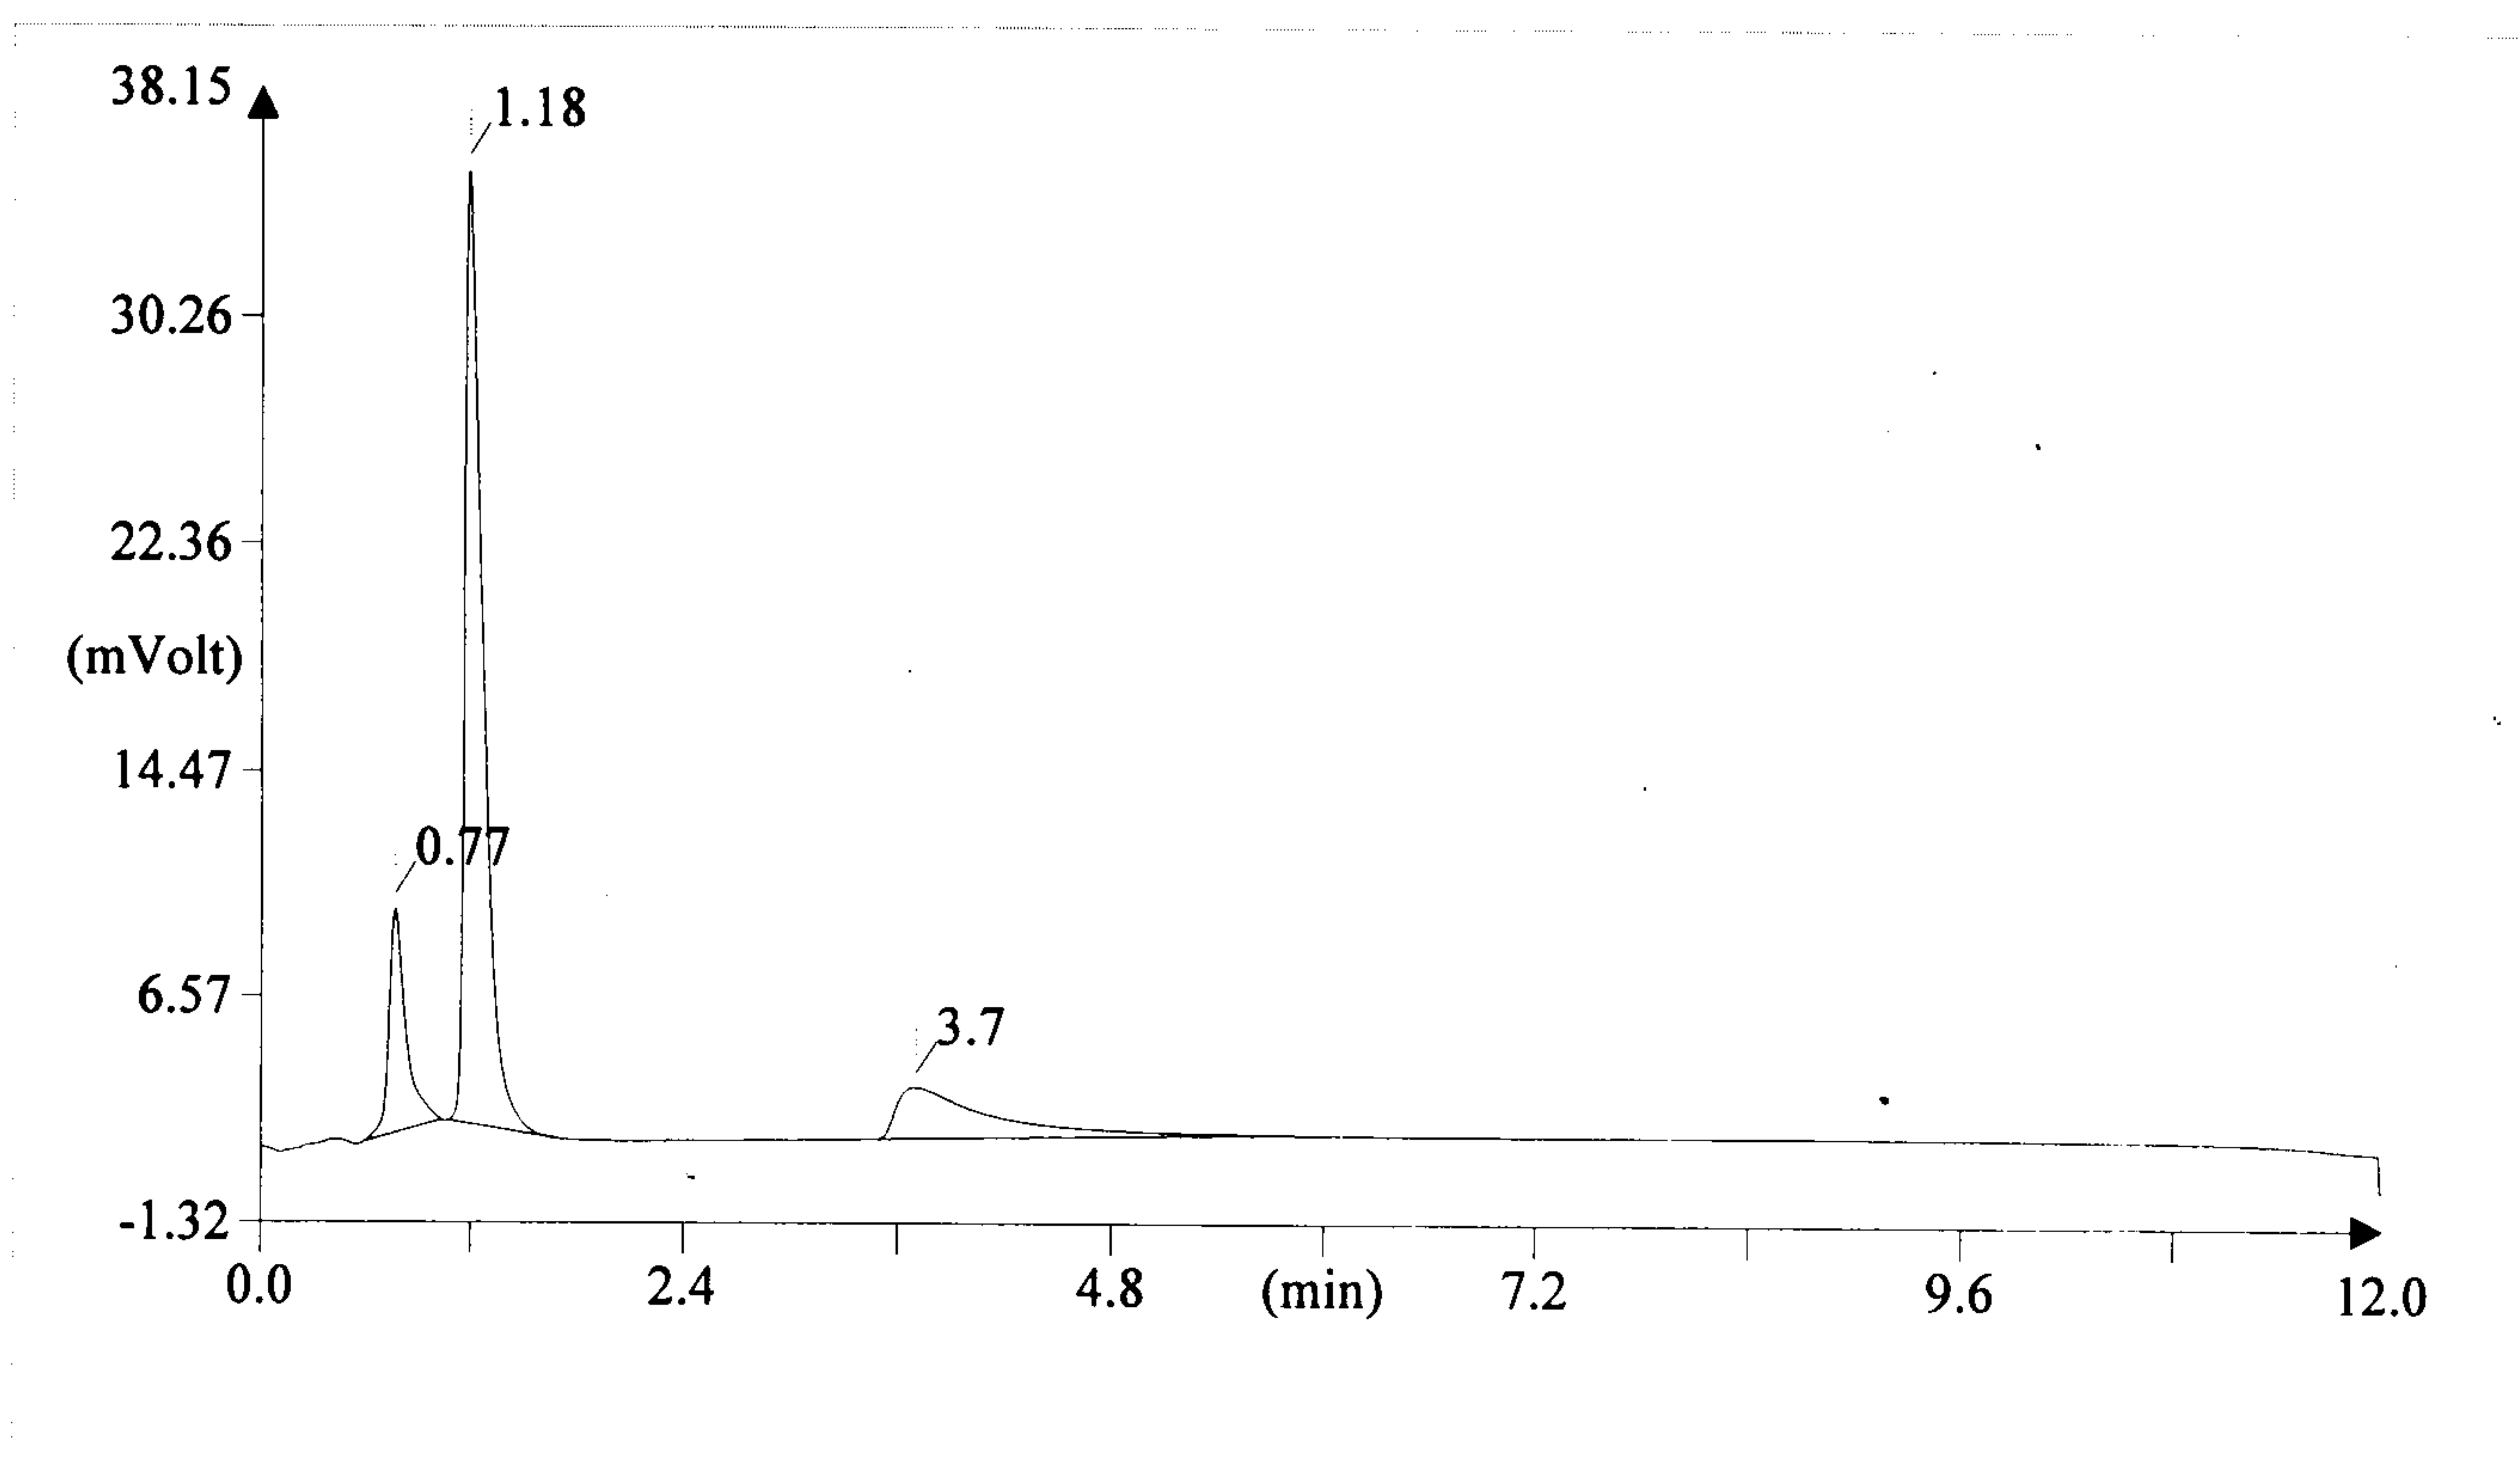

| Element Name | Element % | Ret. Time |
|--------------|-----------|-----------|
| Nitrogen     | 9.25      | 0.77      |
| Carbon       | 74.36     | 1.18      |
| Hydrogen     | 5.98      | 3.70      |

*OB*

# FLASH EA 1112 SERIES CHN REPORT

## SCHOOL OF CHEMISTRY

## UNIVERSITY OF HYDERABAD

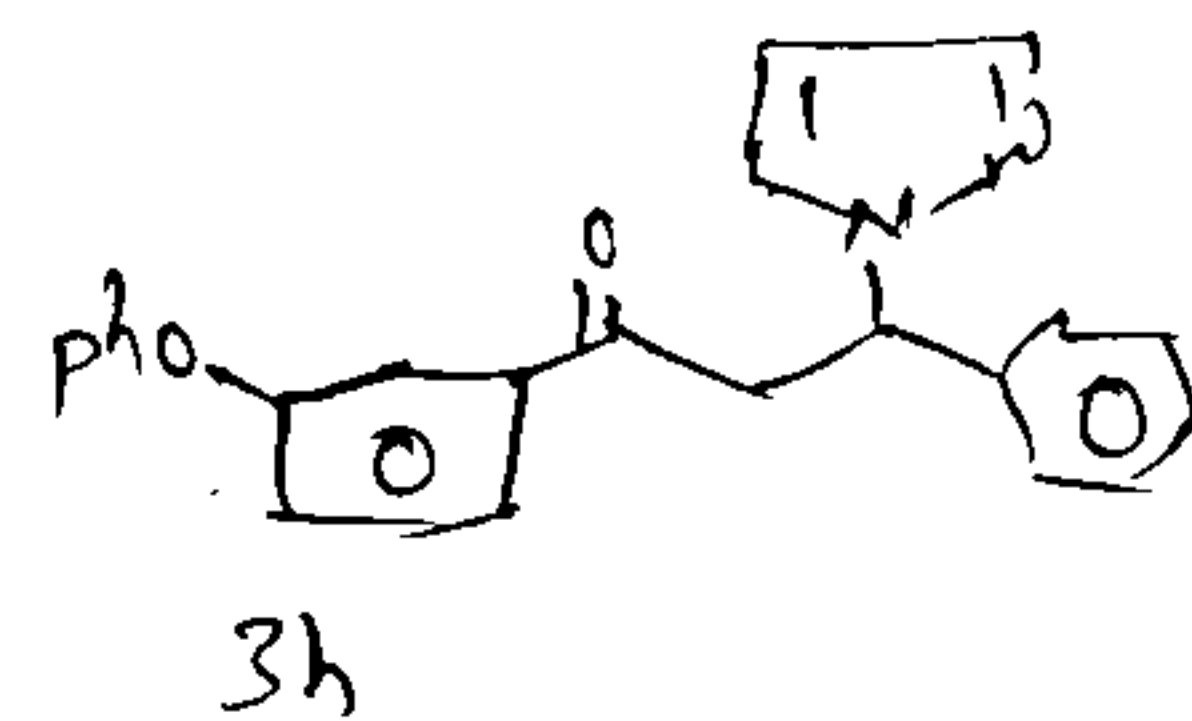

Method filename: E:\Program Files\Thermo Finnigan\Eager 300 for EA1112\DATA\Sys\_data\_ex  
 Sample ID: MBC-11-10-T2 (# 175)  
 Analysis type: UnkNown  
 Chromatogram filename: UNK-15072011-15.dat  
 Sample weight: 1.113

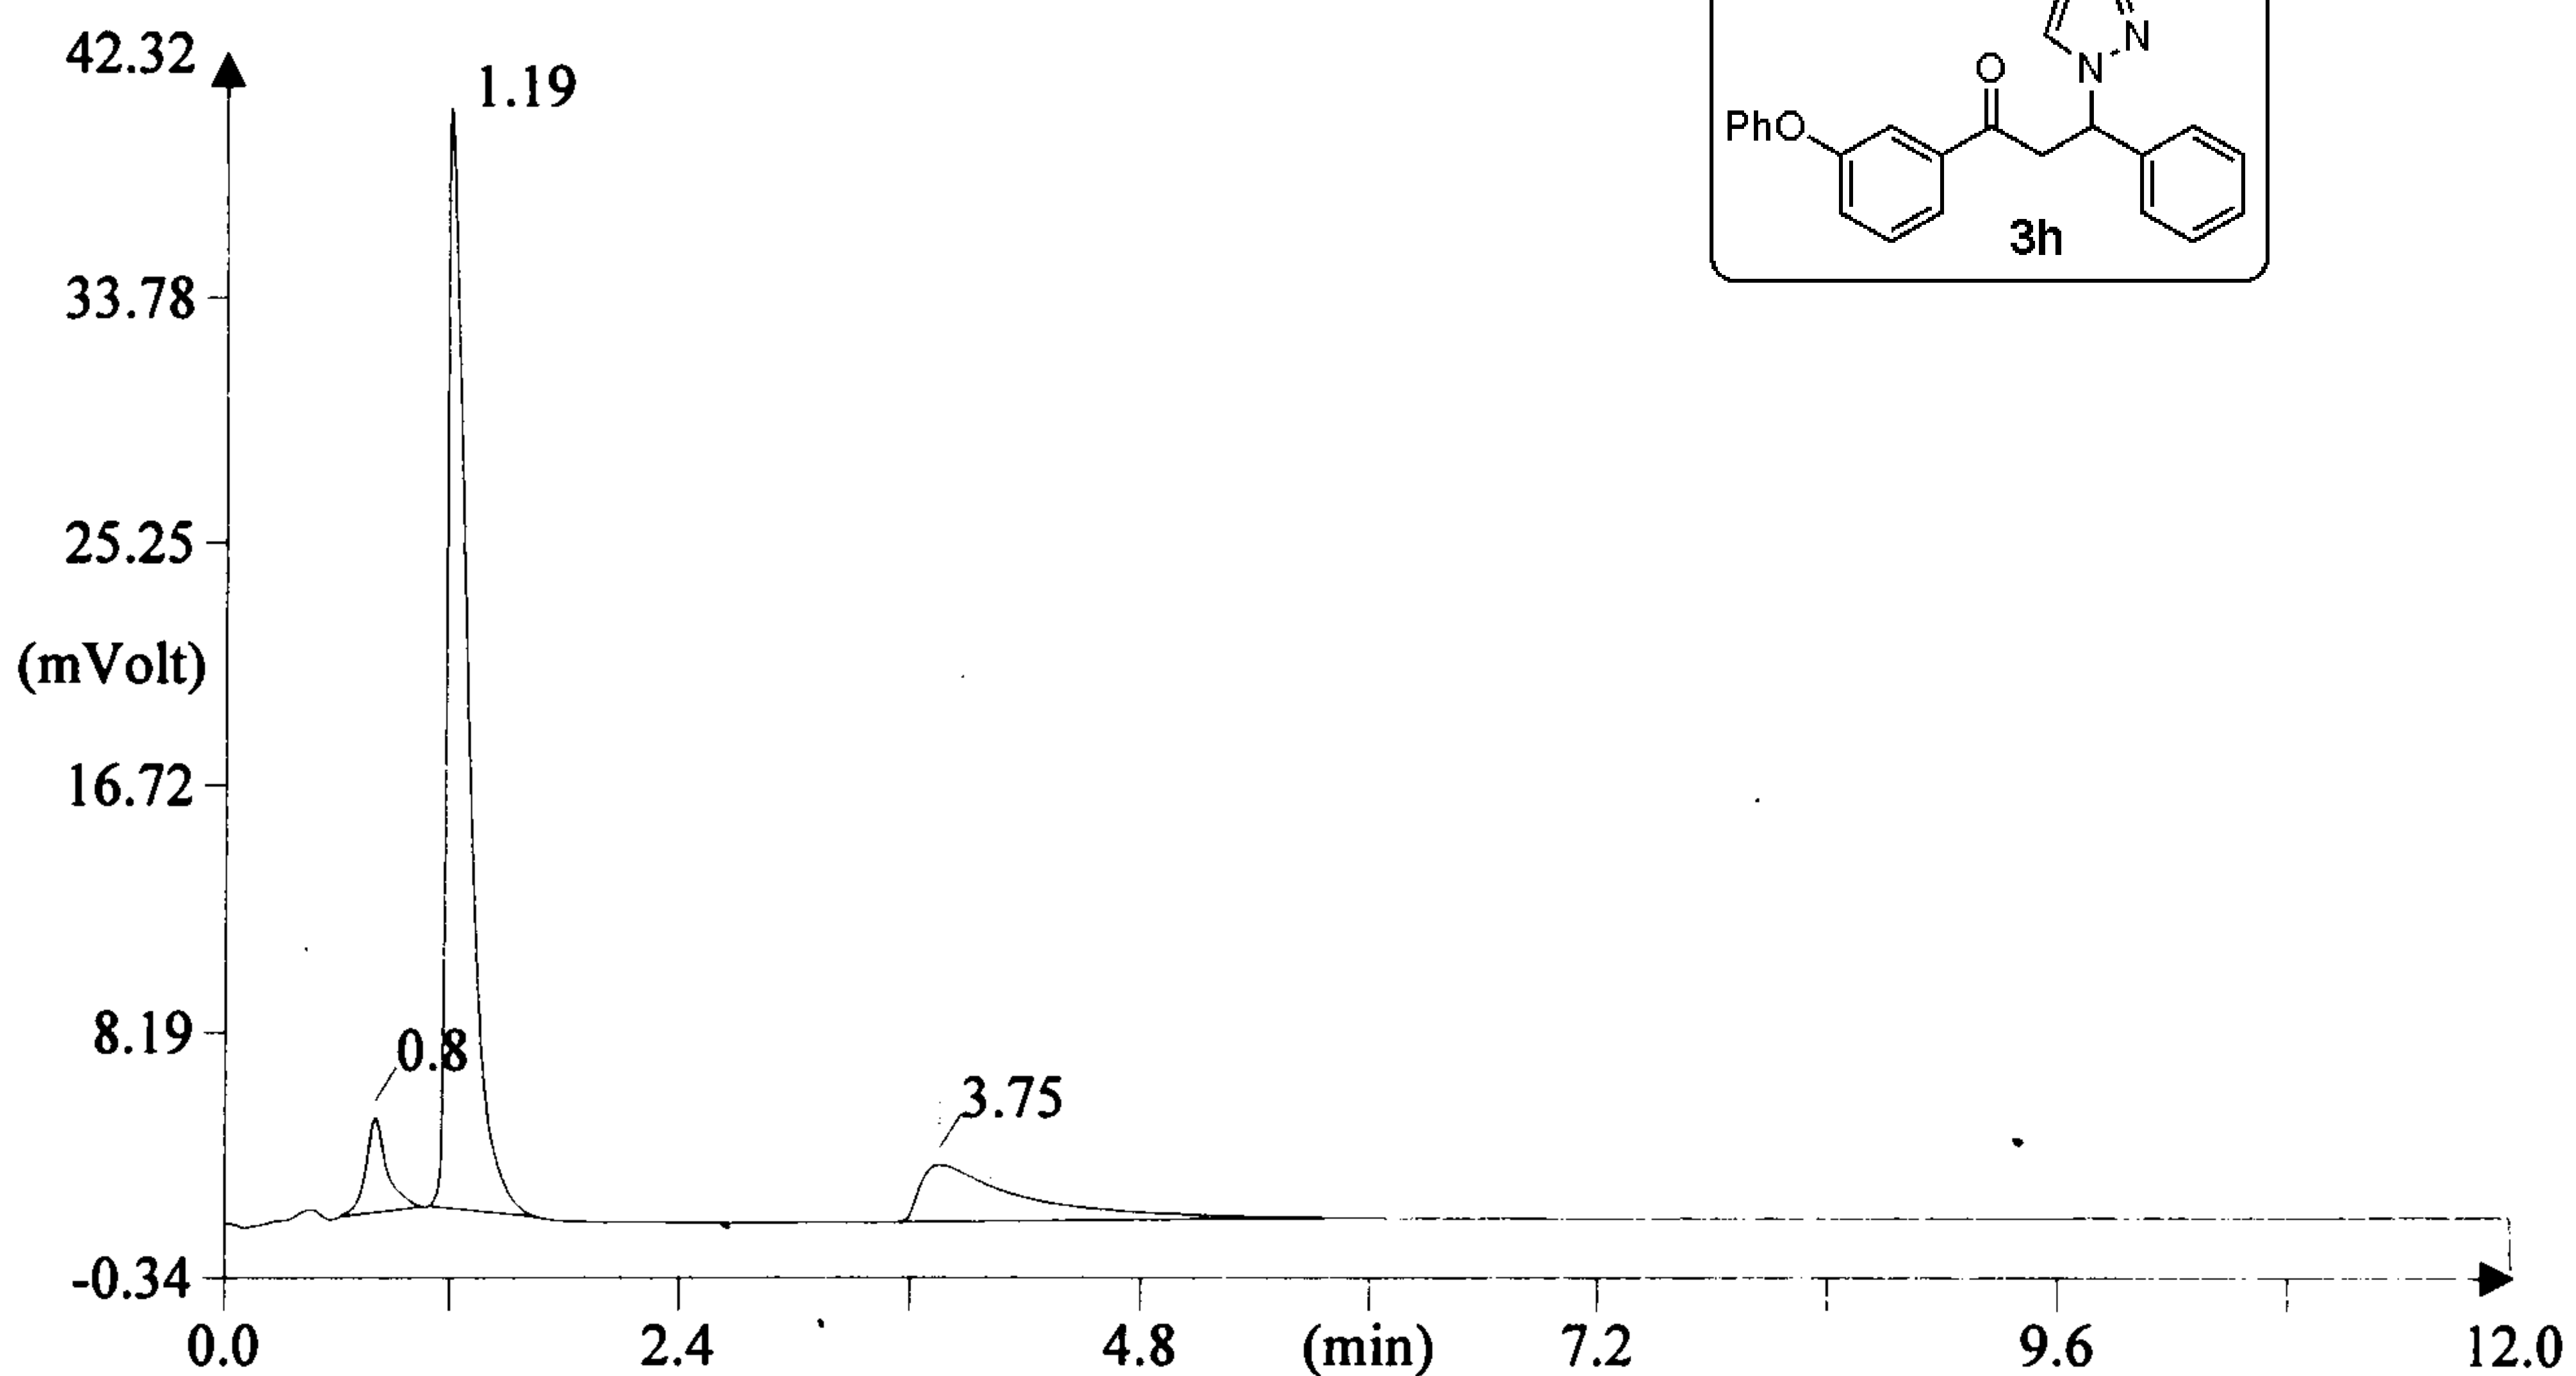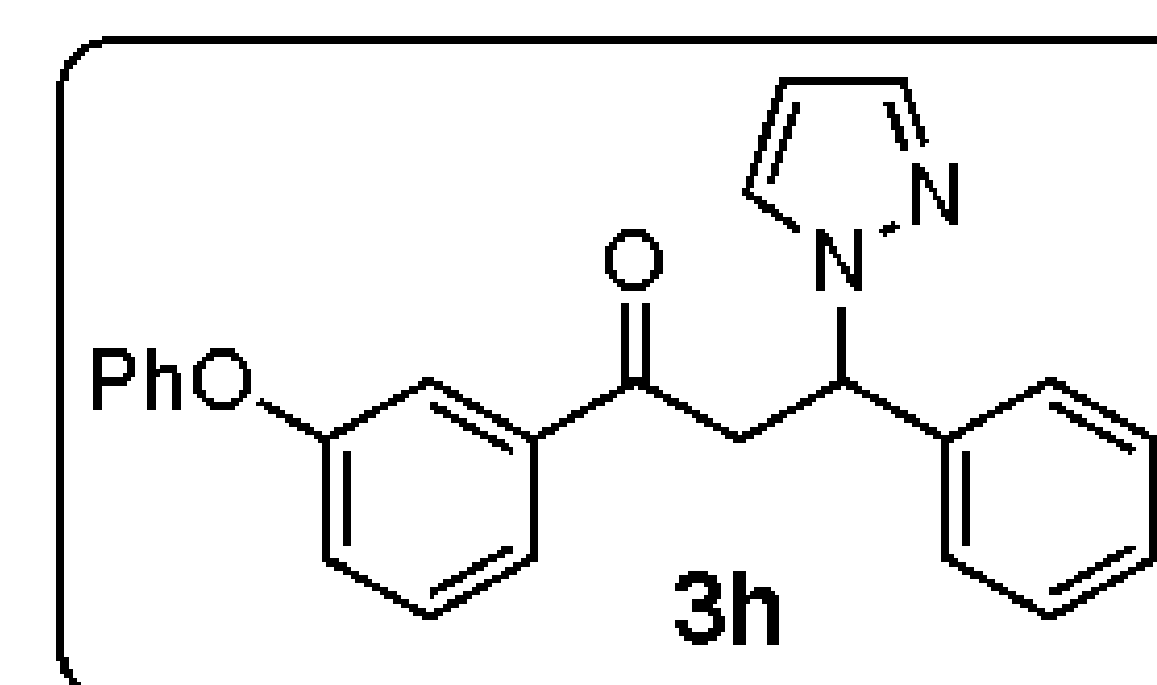

| Element Name | Element % | Ret. Time |
|--------------|-----------|-----------|
| Nitrogen     | 7.52      | 0.80      |
| Carbon       | 78.32     | 1.19      |
| Hydrogen     | 5.43      | 3.75      |

*Signature*

# FLASH EA 1112 SERIES CHN REPORT

## SCHOOL OF CHEMISTRY

## UNIVERSITY OF HYDERABAD

Method filename: I:\Program Files\Thermo Finnigan\Eager 300 for EA1112\DATA\Sys\_data\_exa  
 Sample ID: MBC-11-24-T2 (# 96)  
 Analysis type: UnkNown  
 Chromatogram filename: UNK-21122010-6.dat  
 Sample weight: 1.113

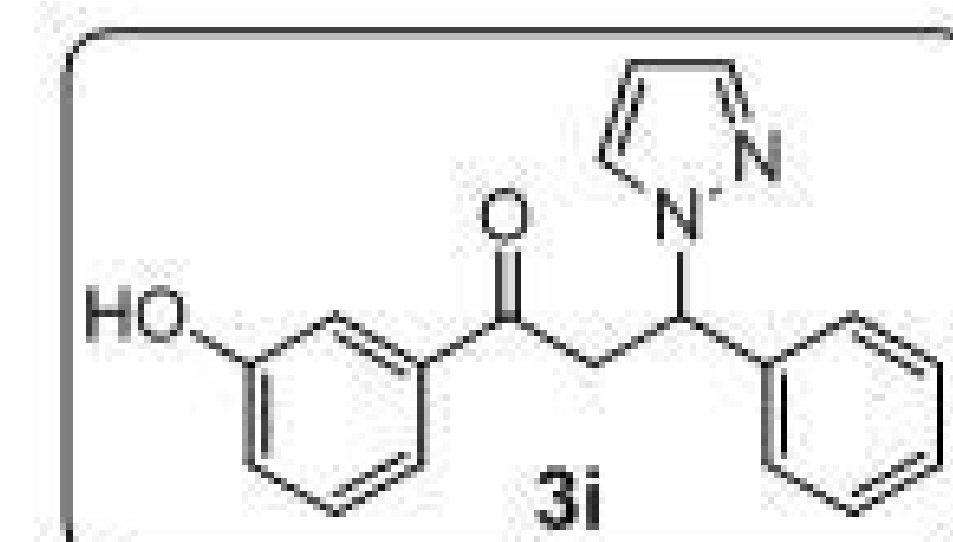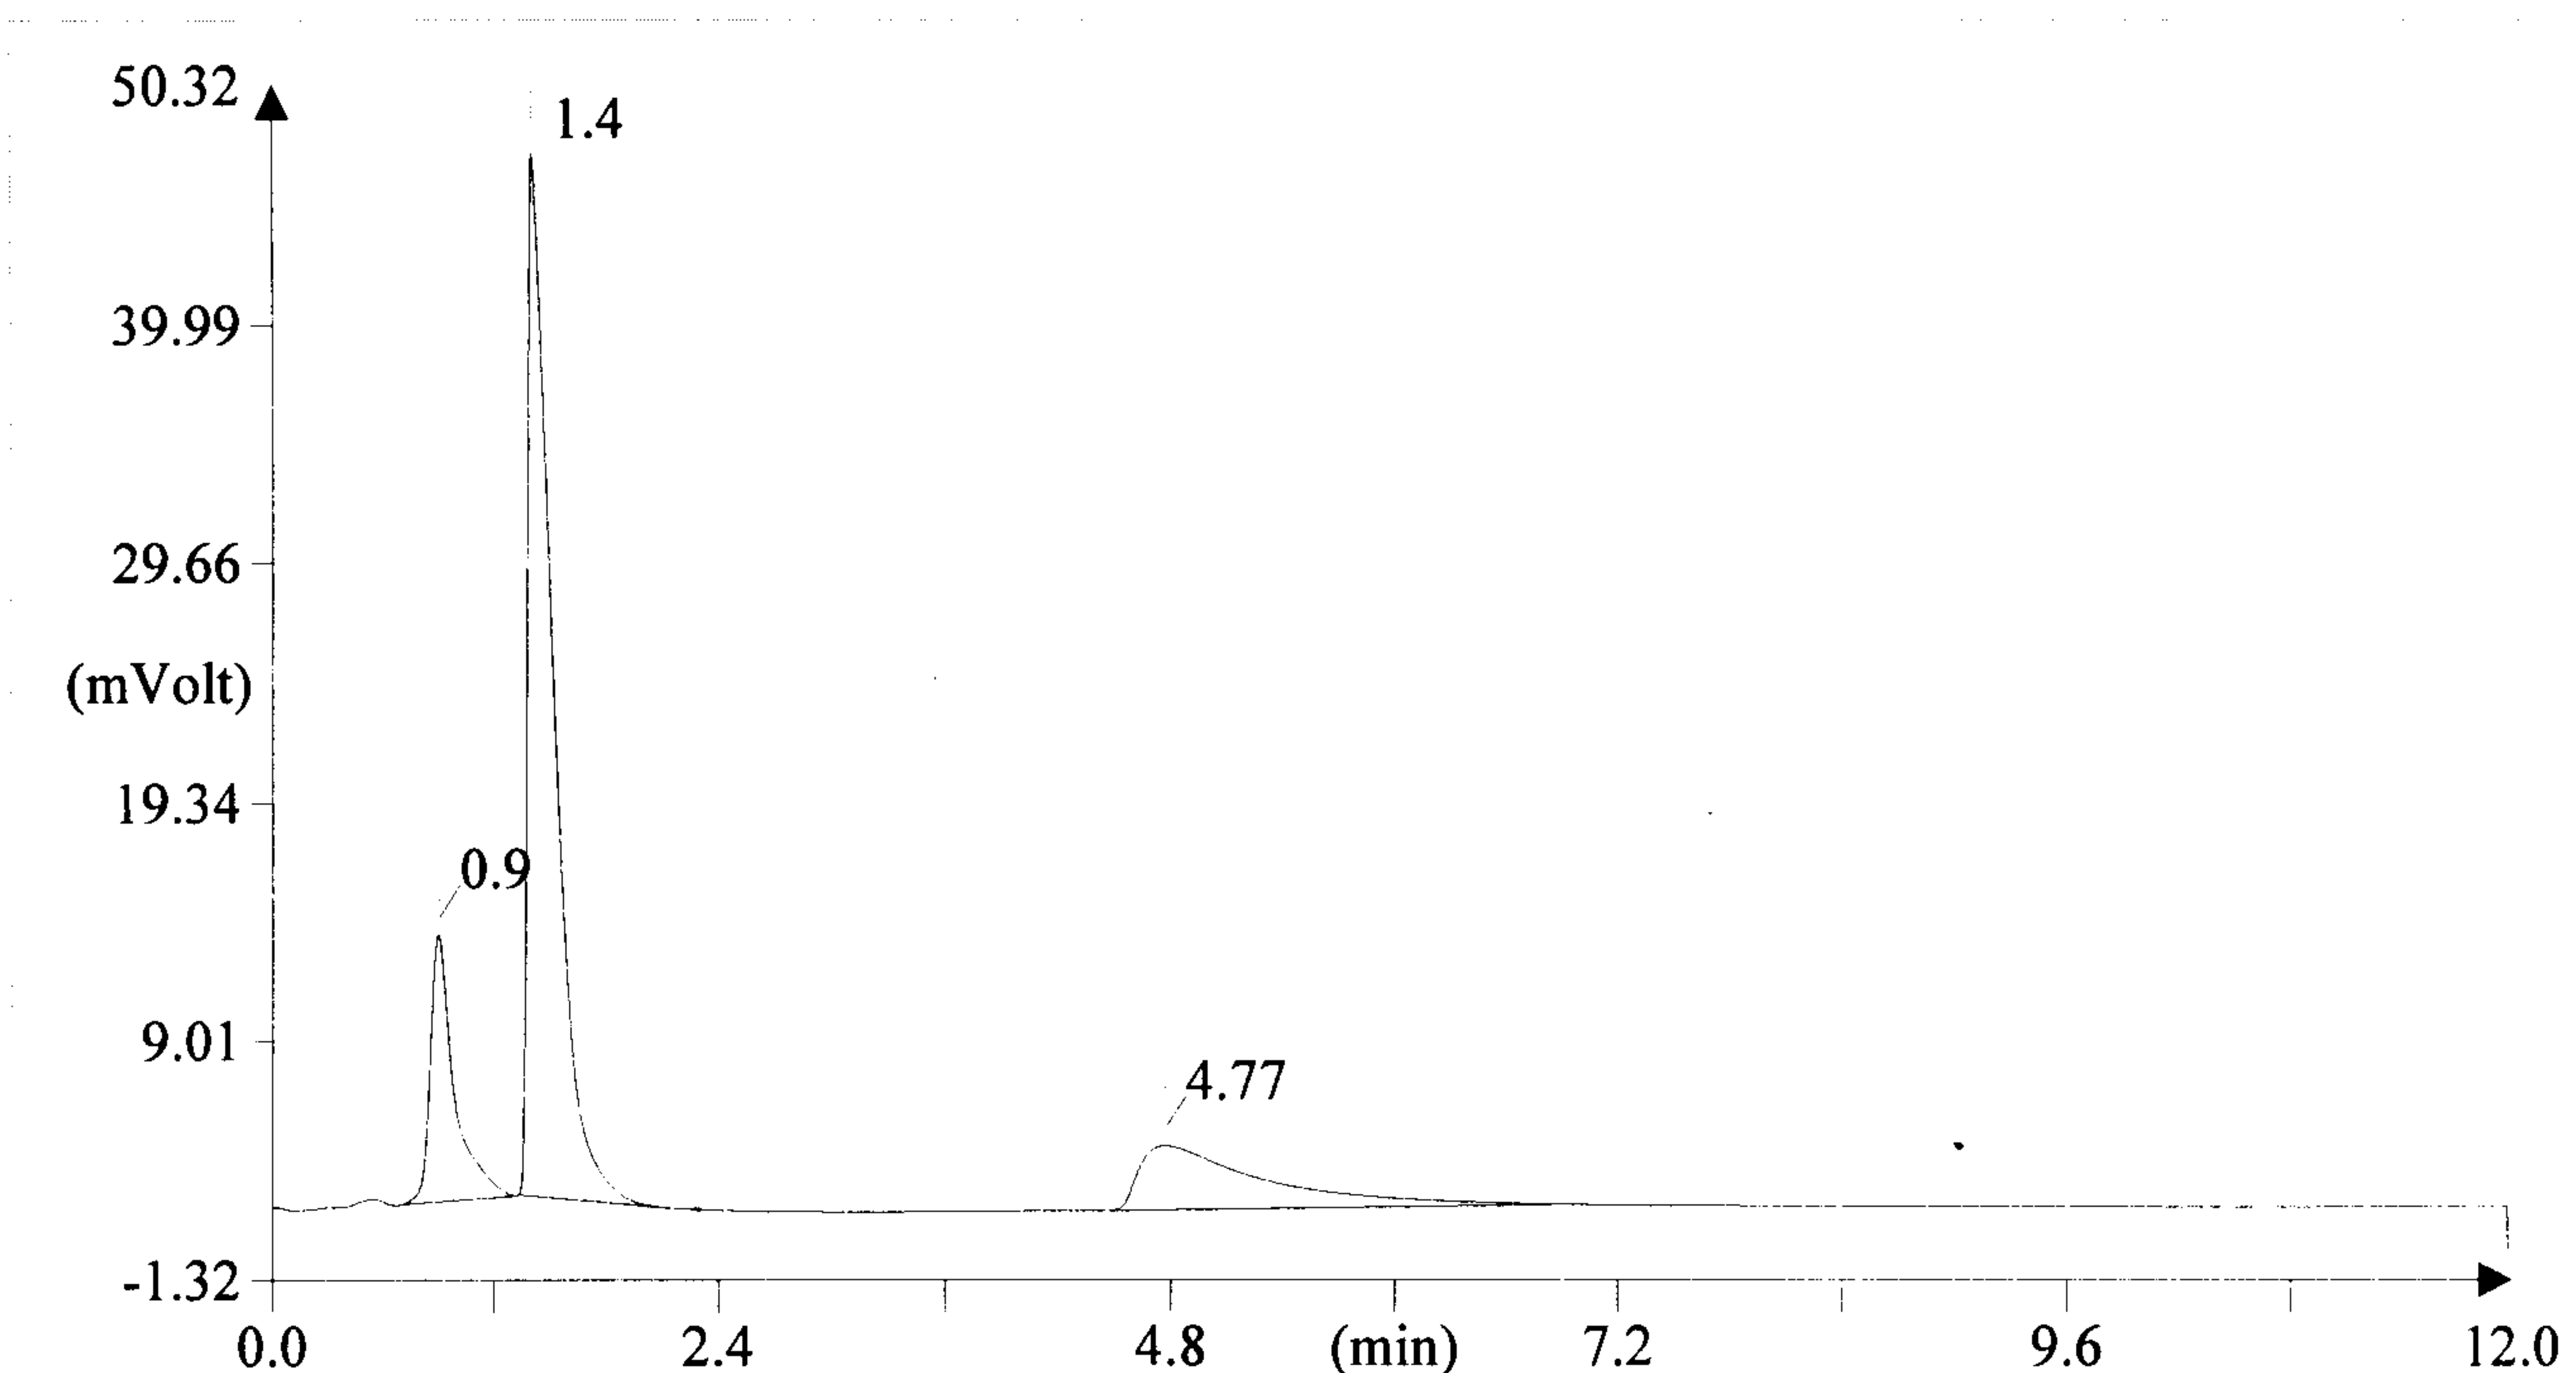

| Element Name | Element % | Ret. Time |
|--------------|-----------|-----------|
| Nitrogen     | 9. 68     | 0. 90     |
| Carbon       | 73. 85    | 1. 40     |
| Hydrogen     | 5. 48     | 4. 77     |

*Signature*



# FLASH EA 1112 SERIES CHN REPORT

## SCHOOL OF CHEMISTRY

## UNIVERSITY OF HYDERABAD

Method filename: I:\Program Files\Thermo Finnigan\Eager 300 for EA1112\DATA\Sys\_data\_exa  
Sample ID: MBC-11-23-T1 (# 98)  
Analysis type: UnkNown  
Chromatogram filename: UNK-21122010-8.dat  
Sample weight: 1.121

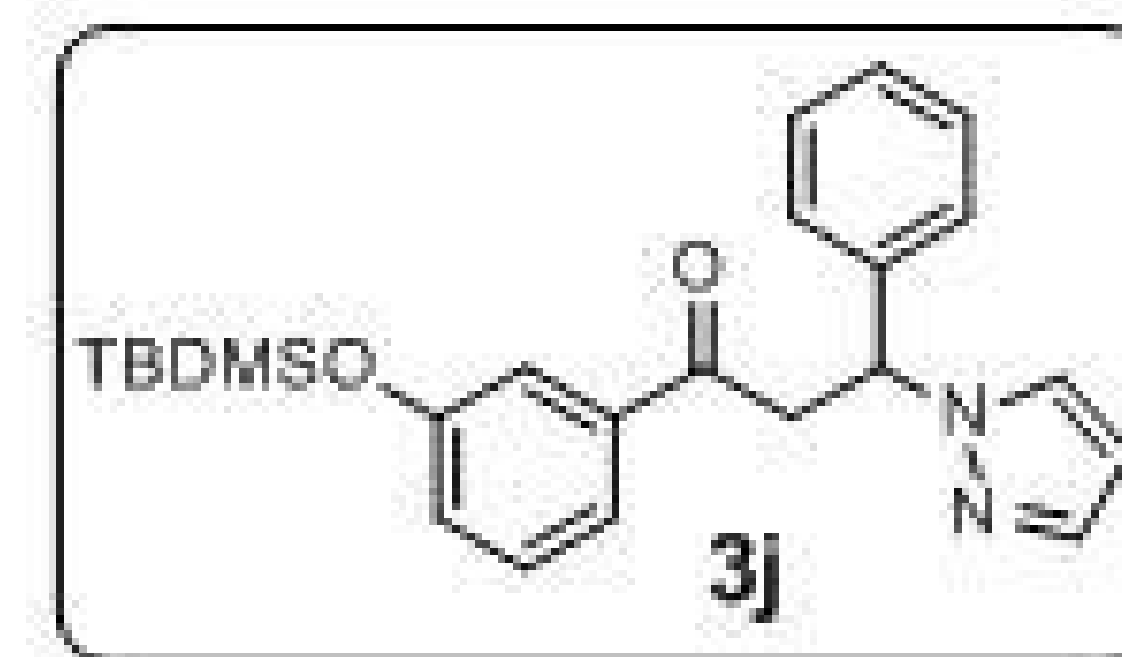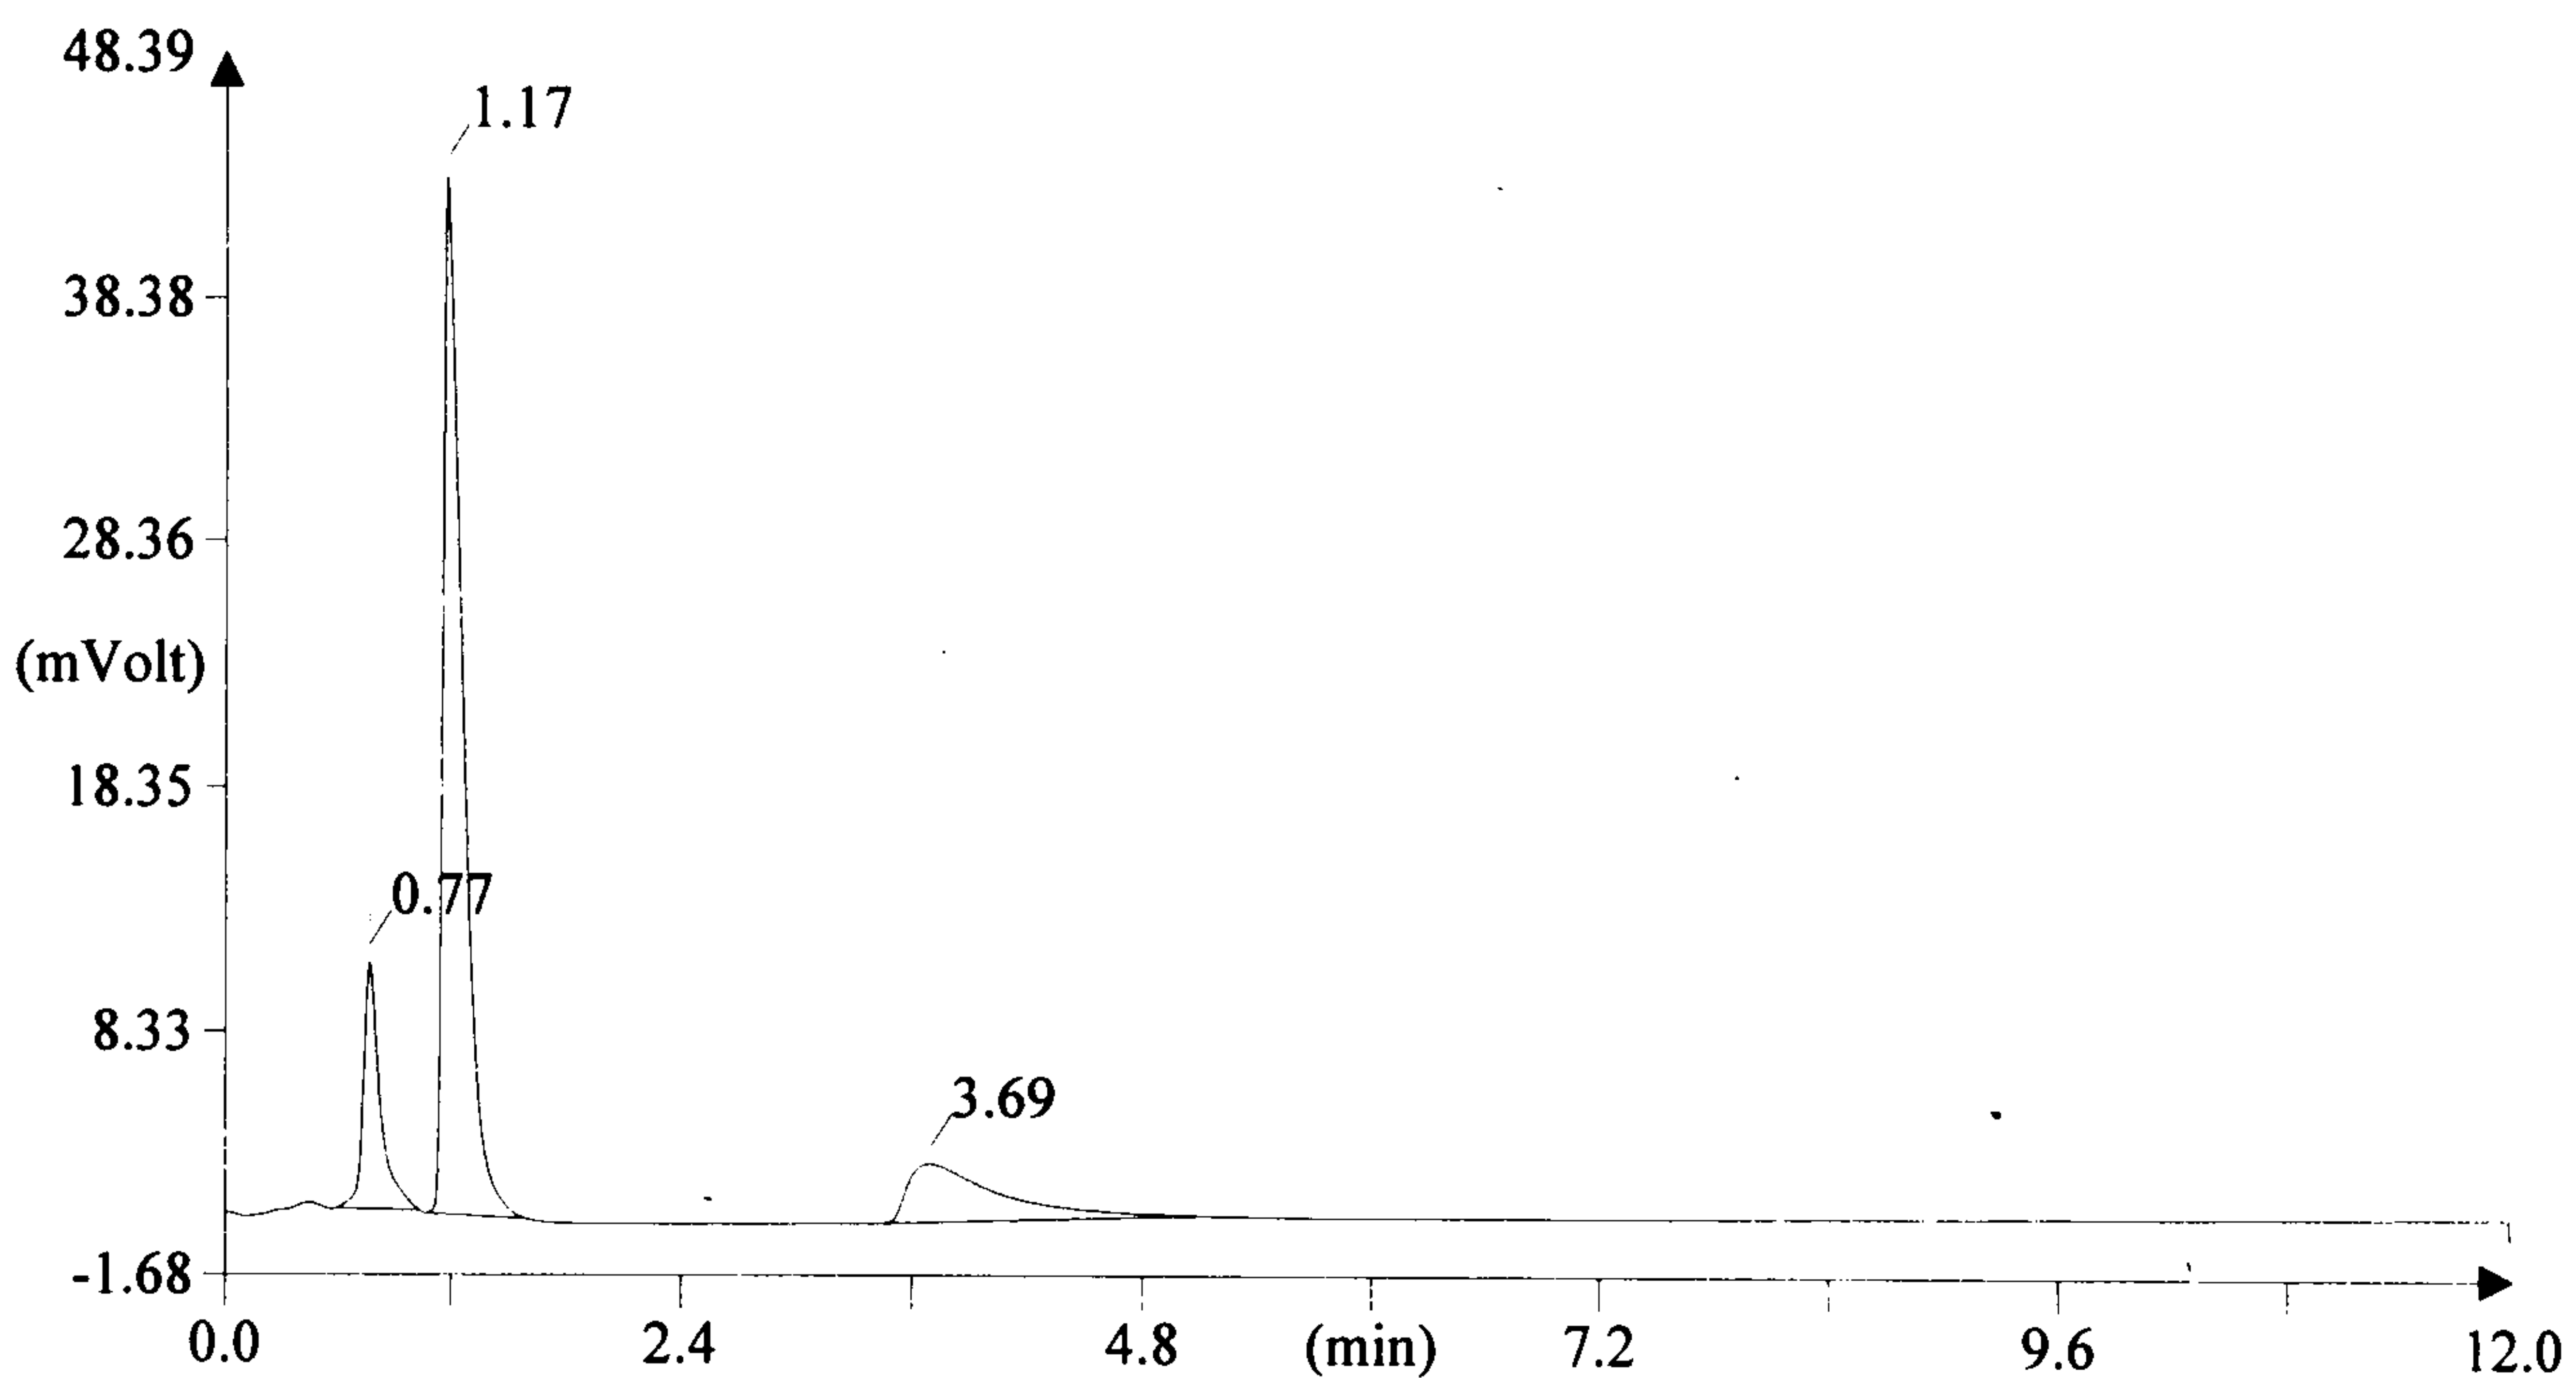

| Element Name | Element % | Ret. Time |
|--------------|-----------|-----------|
| Nitrogen     | 6.75      | 0.77      |
| Carbon       | 71.21     | 1.17      |
| Hydrogen     | 7.48      | 3.69      |

03/12



# FLASH EA 1112 SERIES CHN REPORT

## SCHOOL OF CHEMISTRY

## UNIVERSITY OF HYDERABAD

Method filename: I:\Program Files\Thermo Finnigan\Eager 300 for EA1112\DATA\Sys\_data\_exa  
 Sample ID: MBC-11-90-T3 (# 6)  
 Analysis type: UnkNown  
 Chromatogram filename: UNK-28022011-6.dat  
 Sample weight: 1.142

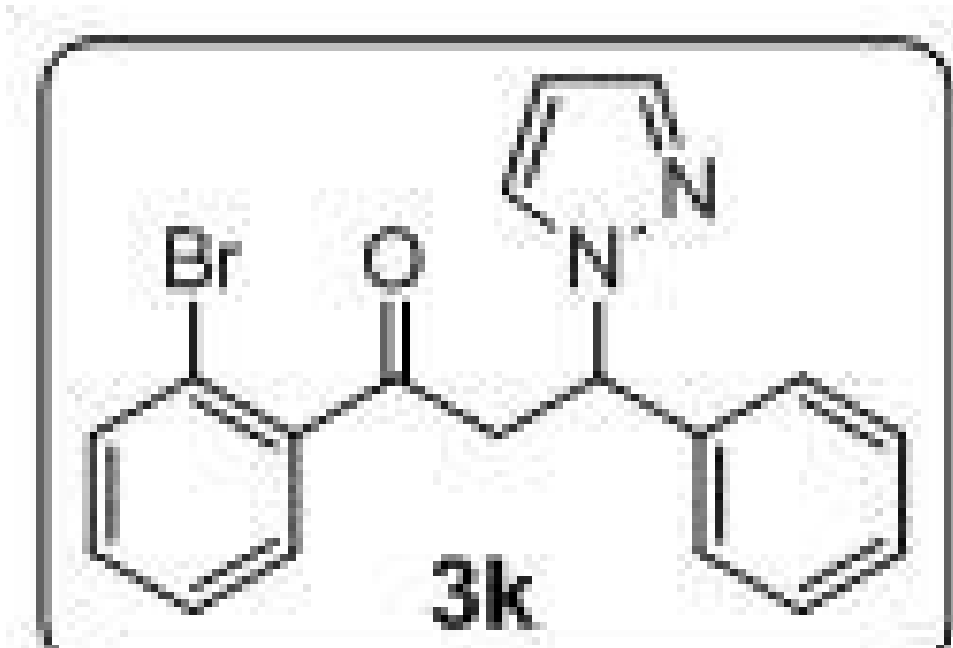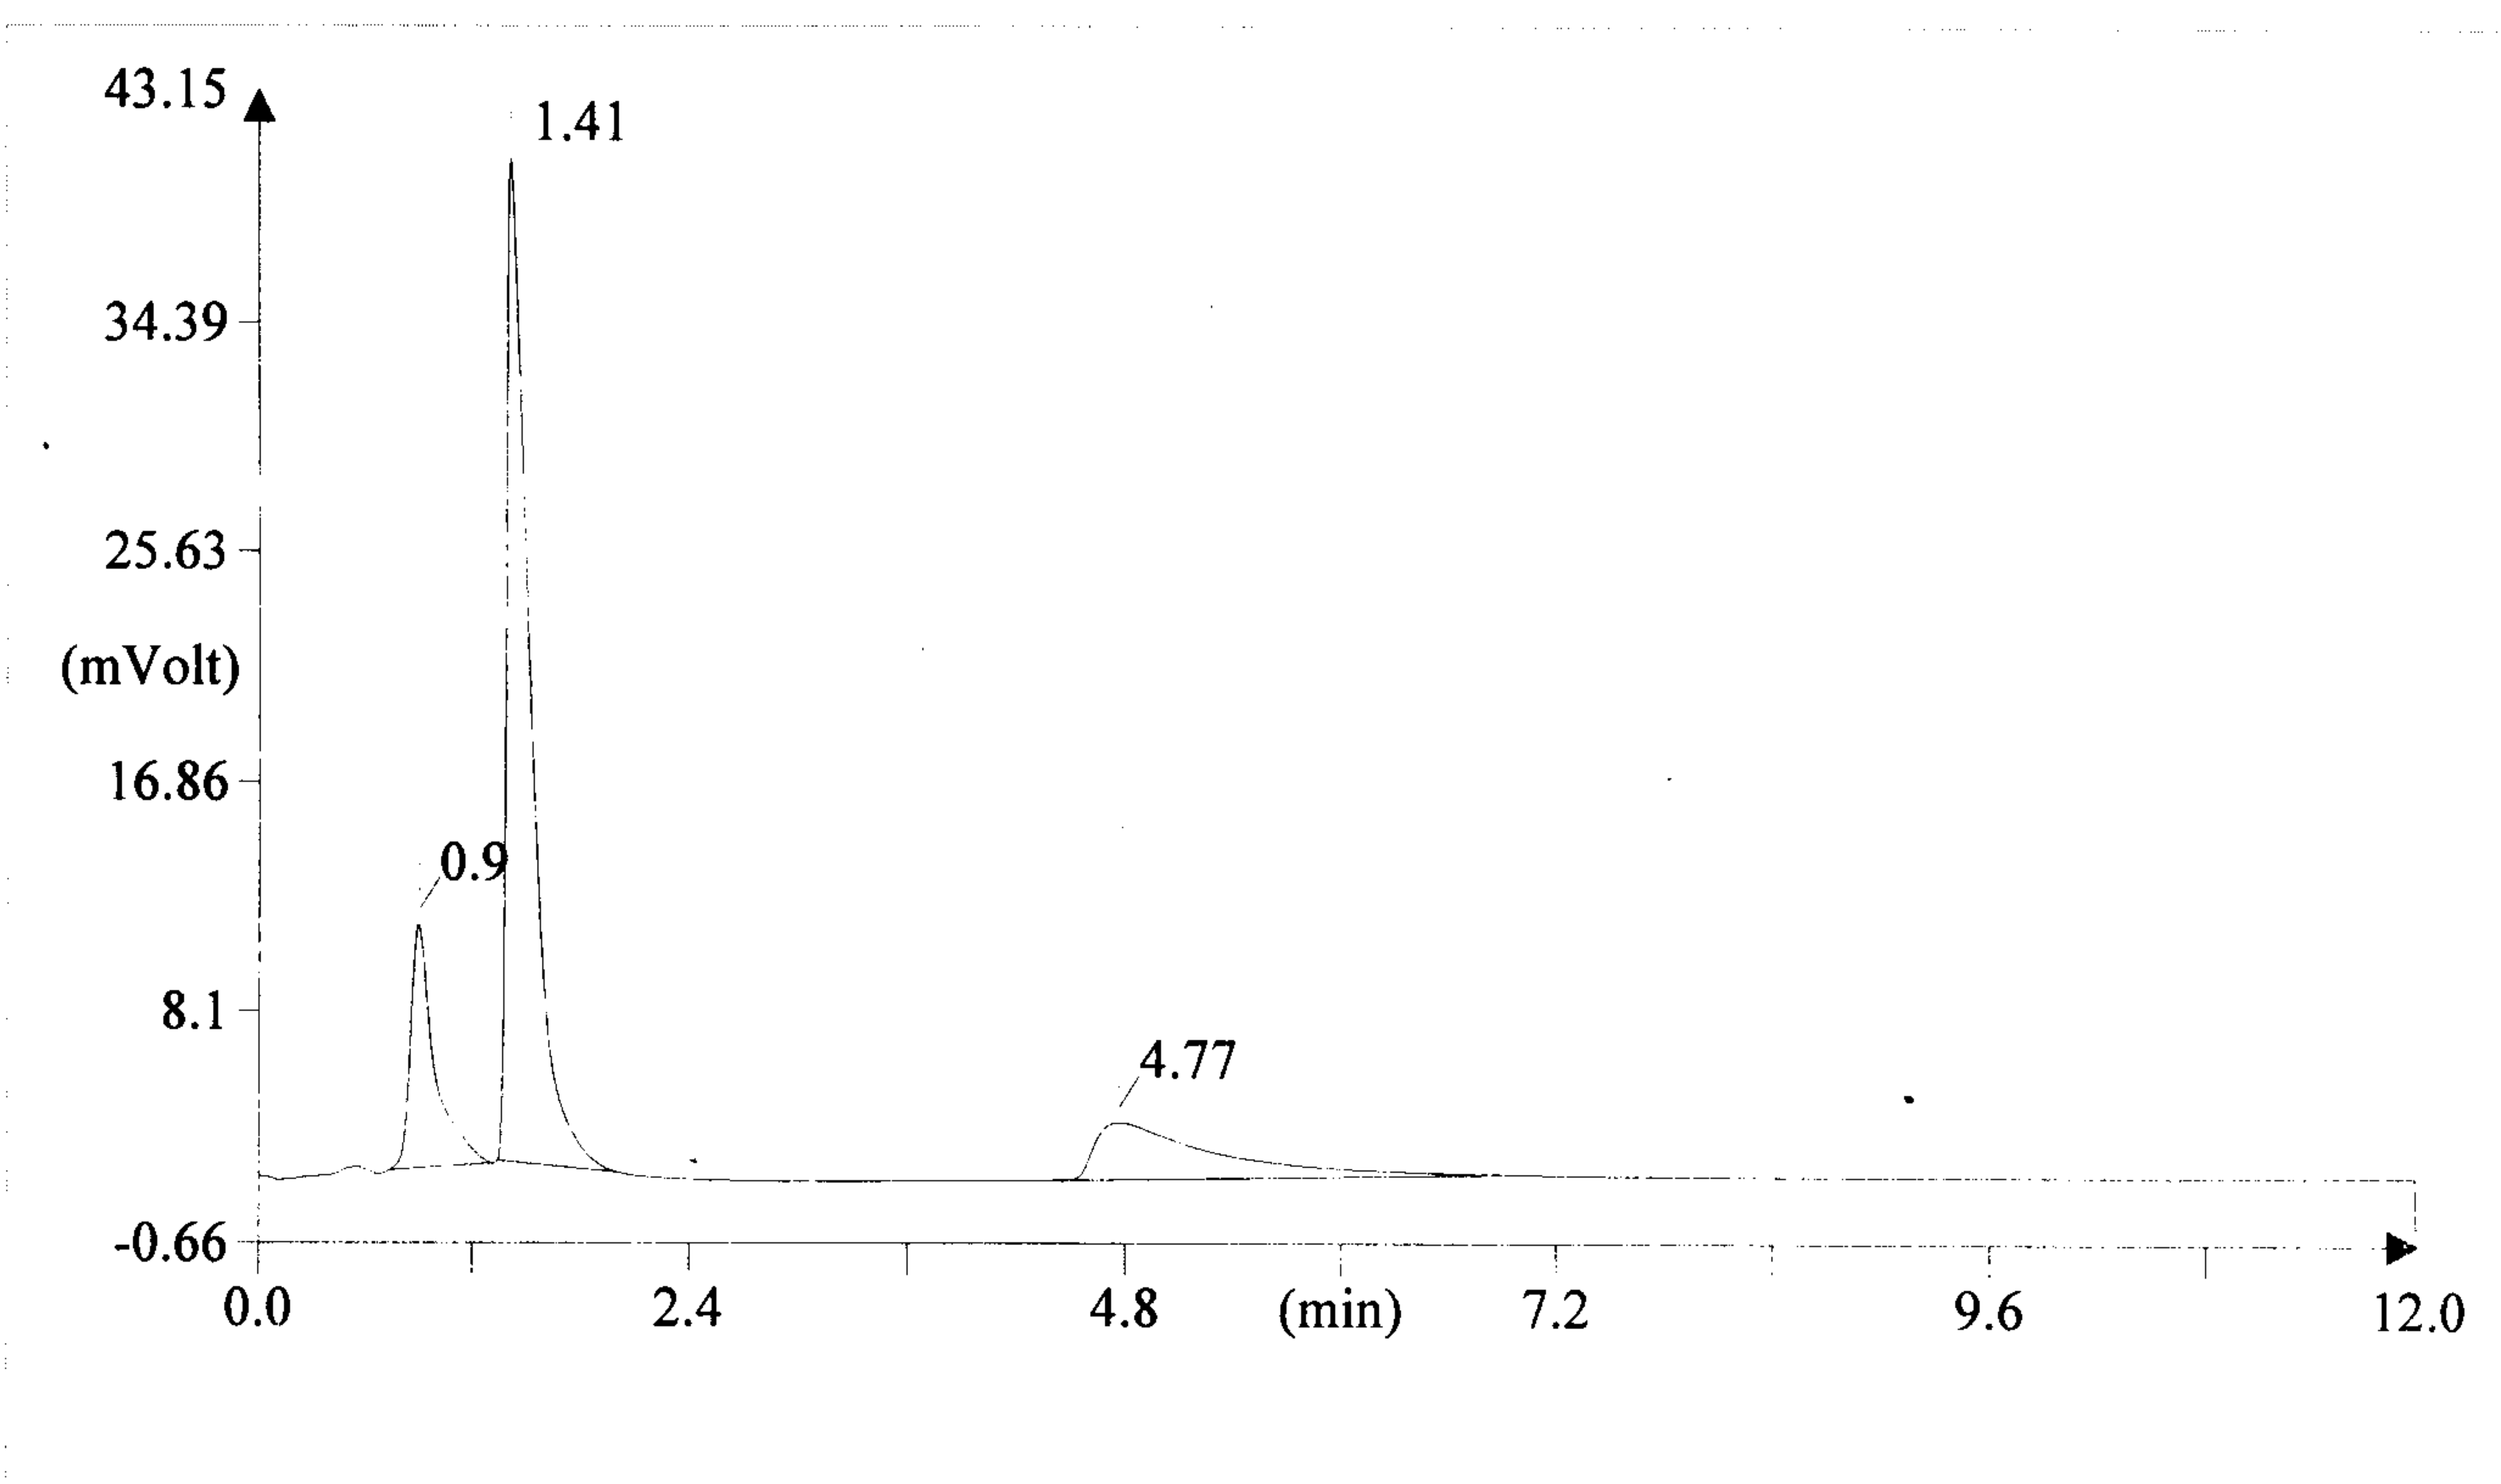

| Element Name | Element % | Ret. Time |
|--------------|-----------|-----------|
| Nitrogen     | 7.68      | 0.90      |
| Carbon       | 60.75     | 1.41      |
| Hydrogen     | 4.32      | 4.77      |

*OSL*

# FLASH EA 1112 SERIES CHN REPORT

## SCHOOL OF CHEMISTRY

## UNIVERSITY OF HYDERABAD

Method filename: C:\Program Files\Thermo Finnigan\Eager 300 for EA1112\DATA\Sys\_data\_ex  
Sample ID: MBC-11-2 (# 4)  
Analysis type: UnkNown  
Chromatogram filename: UNK-28122010-4.dat  
Sample weight: .975

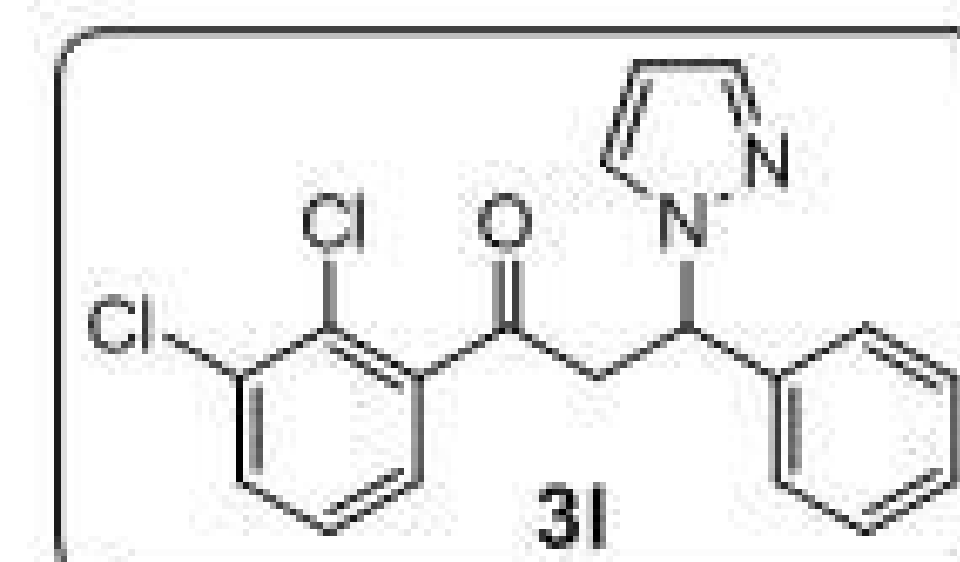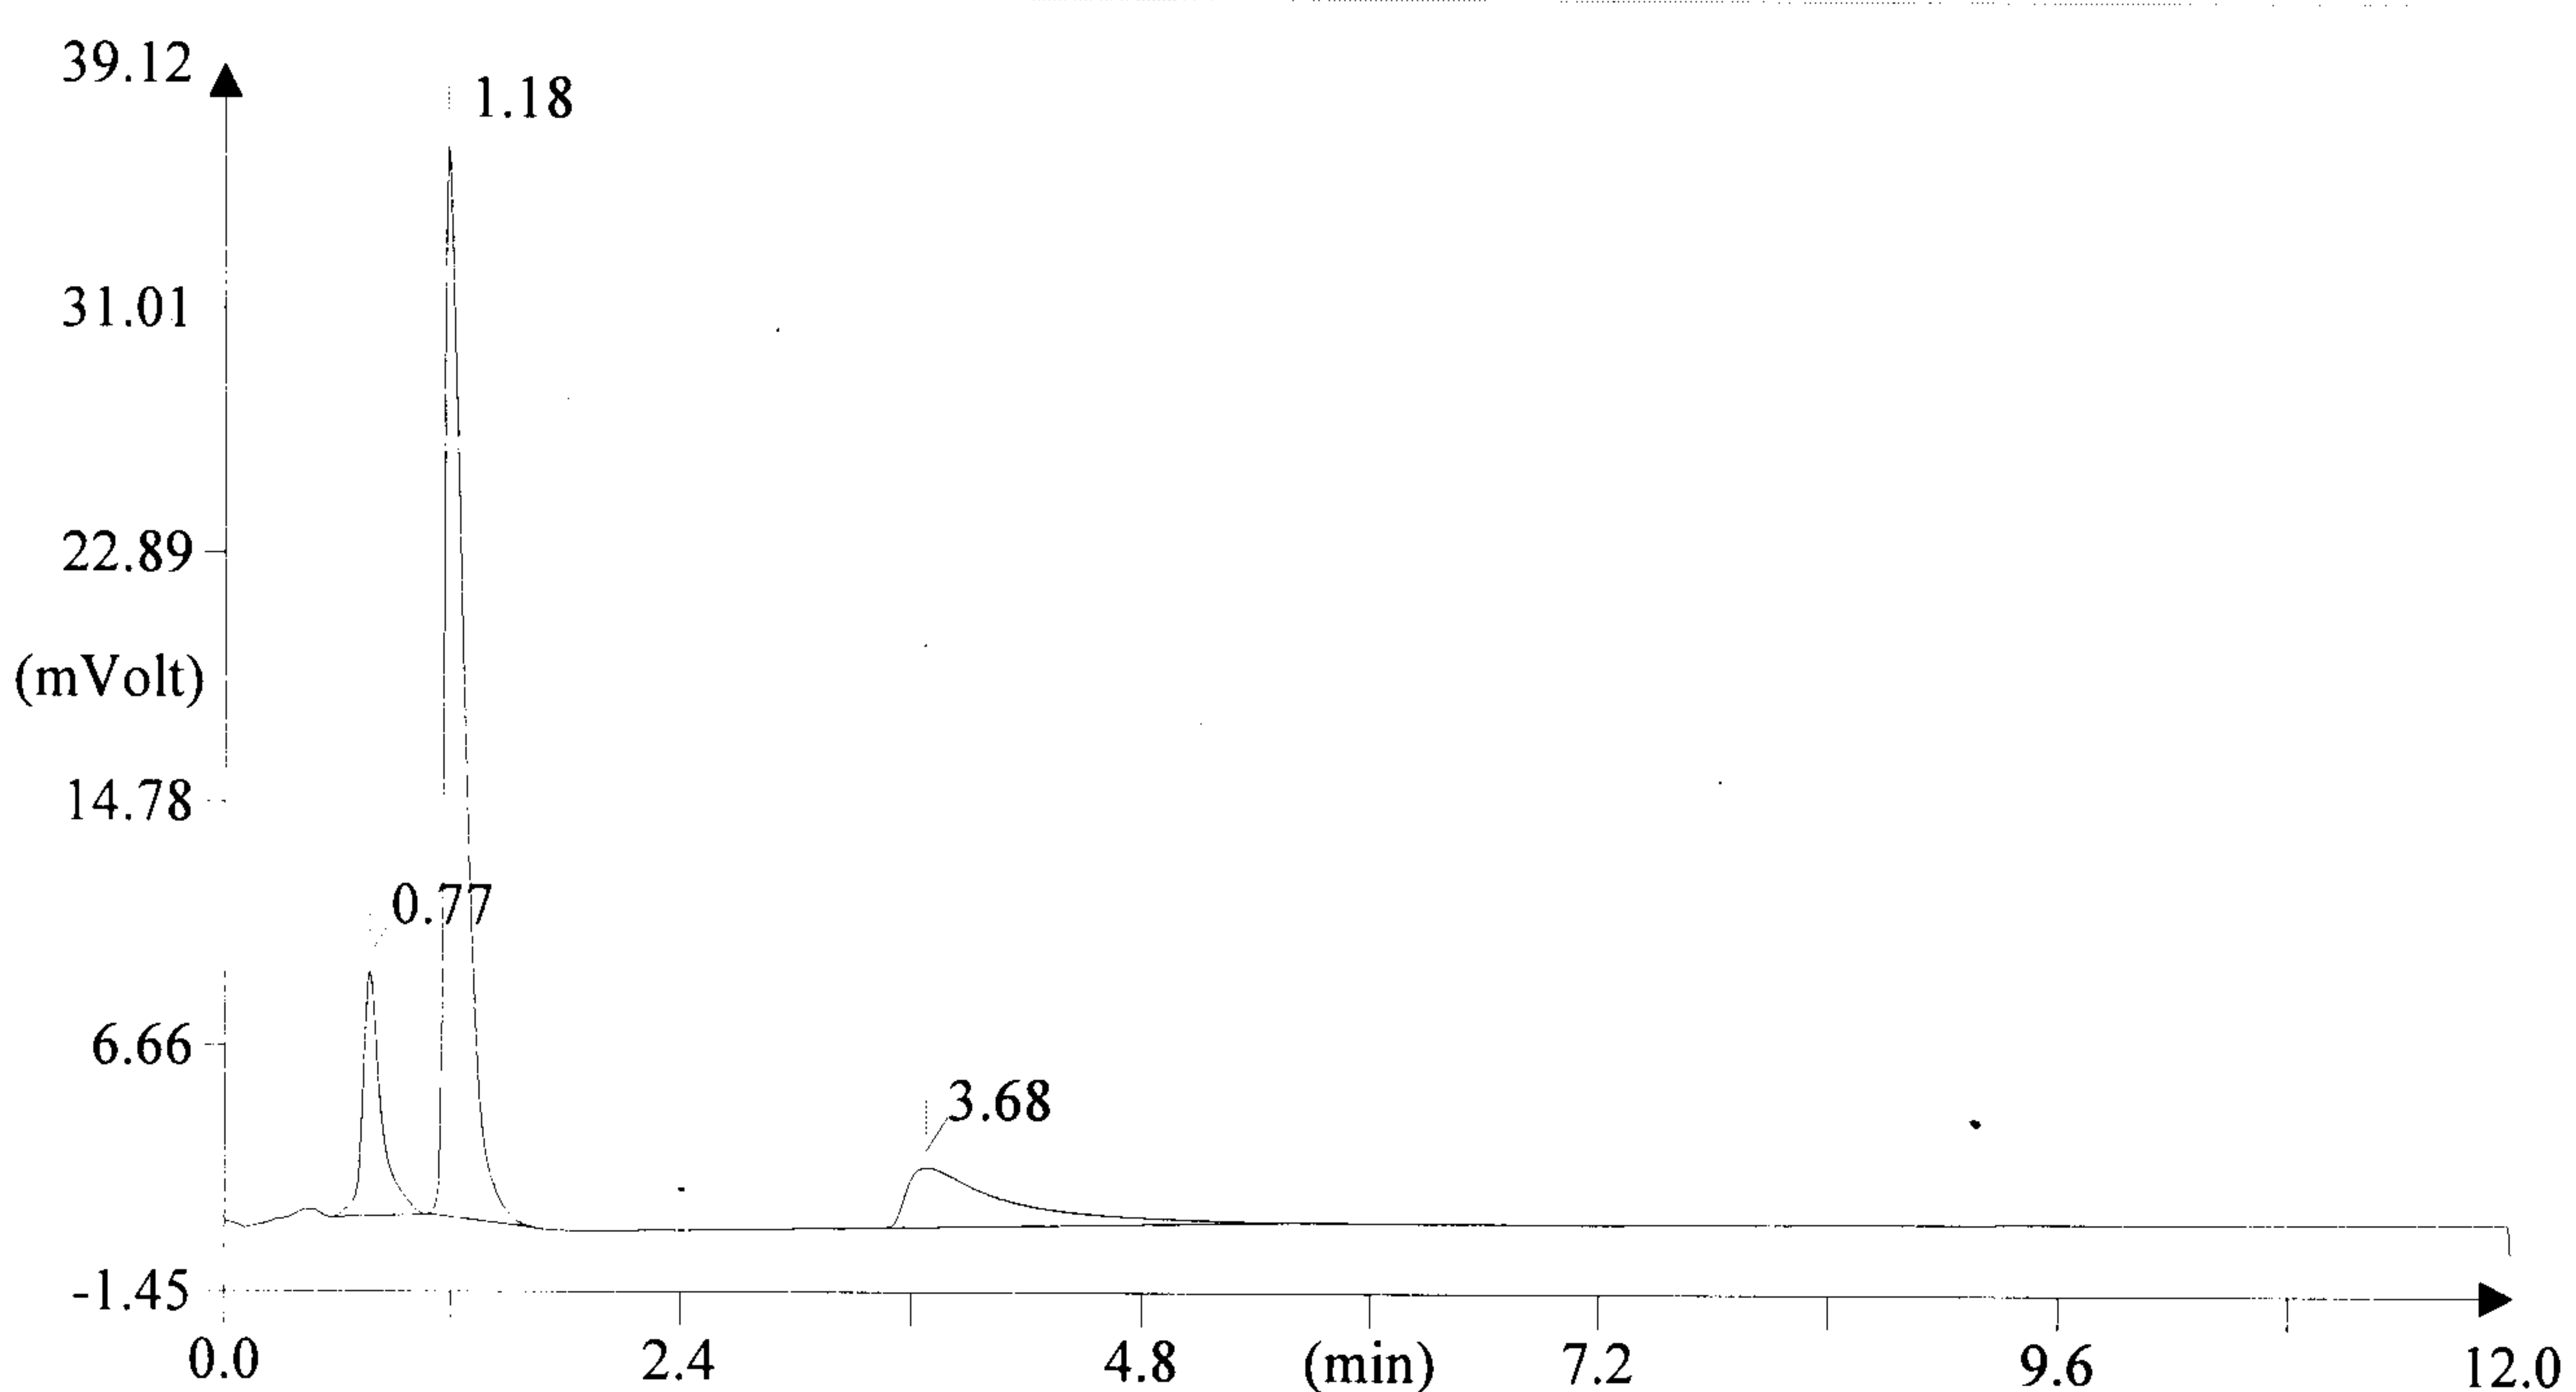

| Element Name | Element % | Ret. Time |
|--------------|-----------|-----------|
| Nitrogen     | 8.25      | 0.77      |
| Carbon       | 62.48     | 1.18      |
| Hydrogen     | 4.15      | 3.68      |

*BSR*

# FLASH EA 1112 SERIES CHN REPORT

## SCHOOL OF CHEMISTRY

## UNIVERSITY OF HYDERABAD

Method filename: C:\Program Files\Thermo Finnigan\Eager 300 for EA1112\DATA\Sys\_data\_ex  
Sample ID: MBC-11-3 (# 5)  
Analysis type: UnkNown  
Chromatogram filename: UNK-28122010-5.dat  
Sample weight: .973

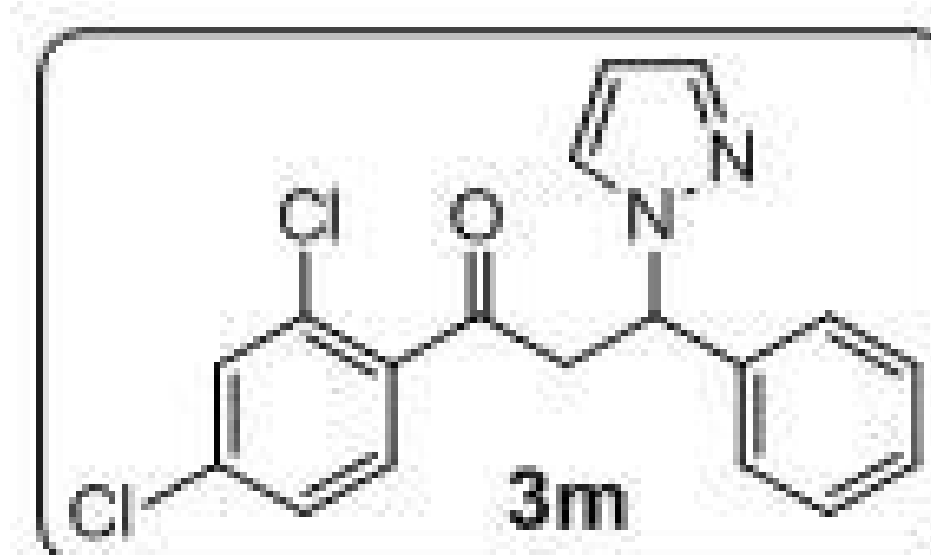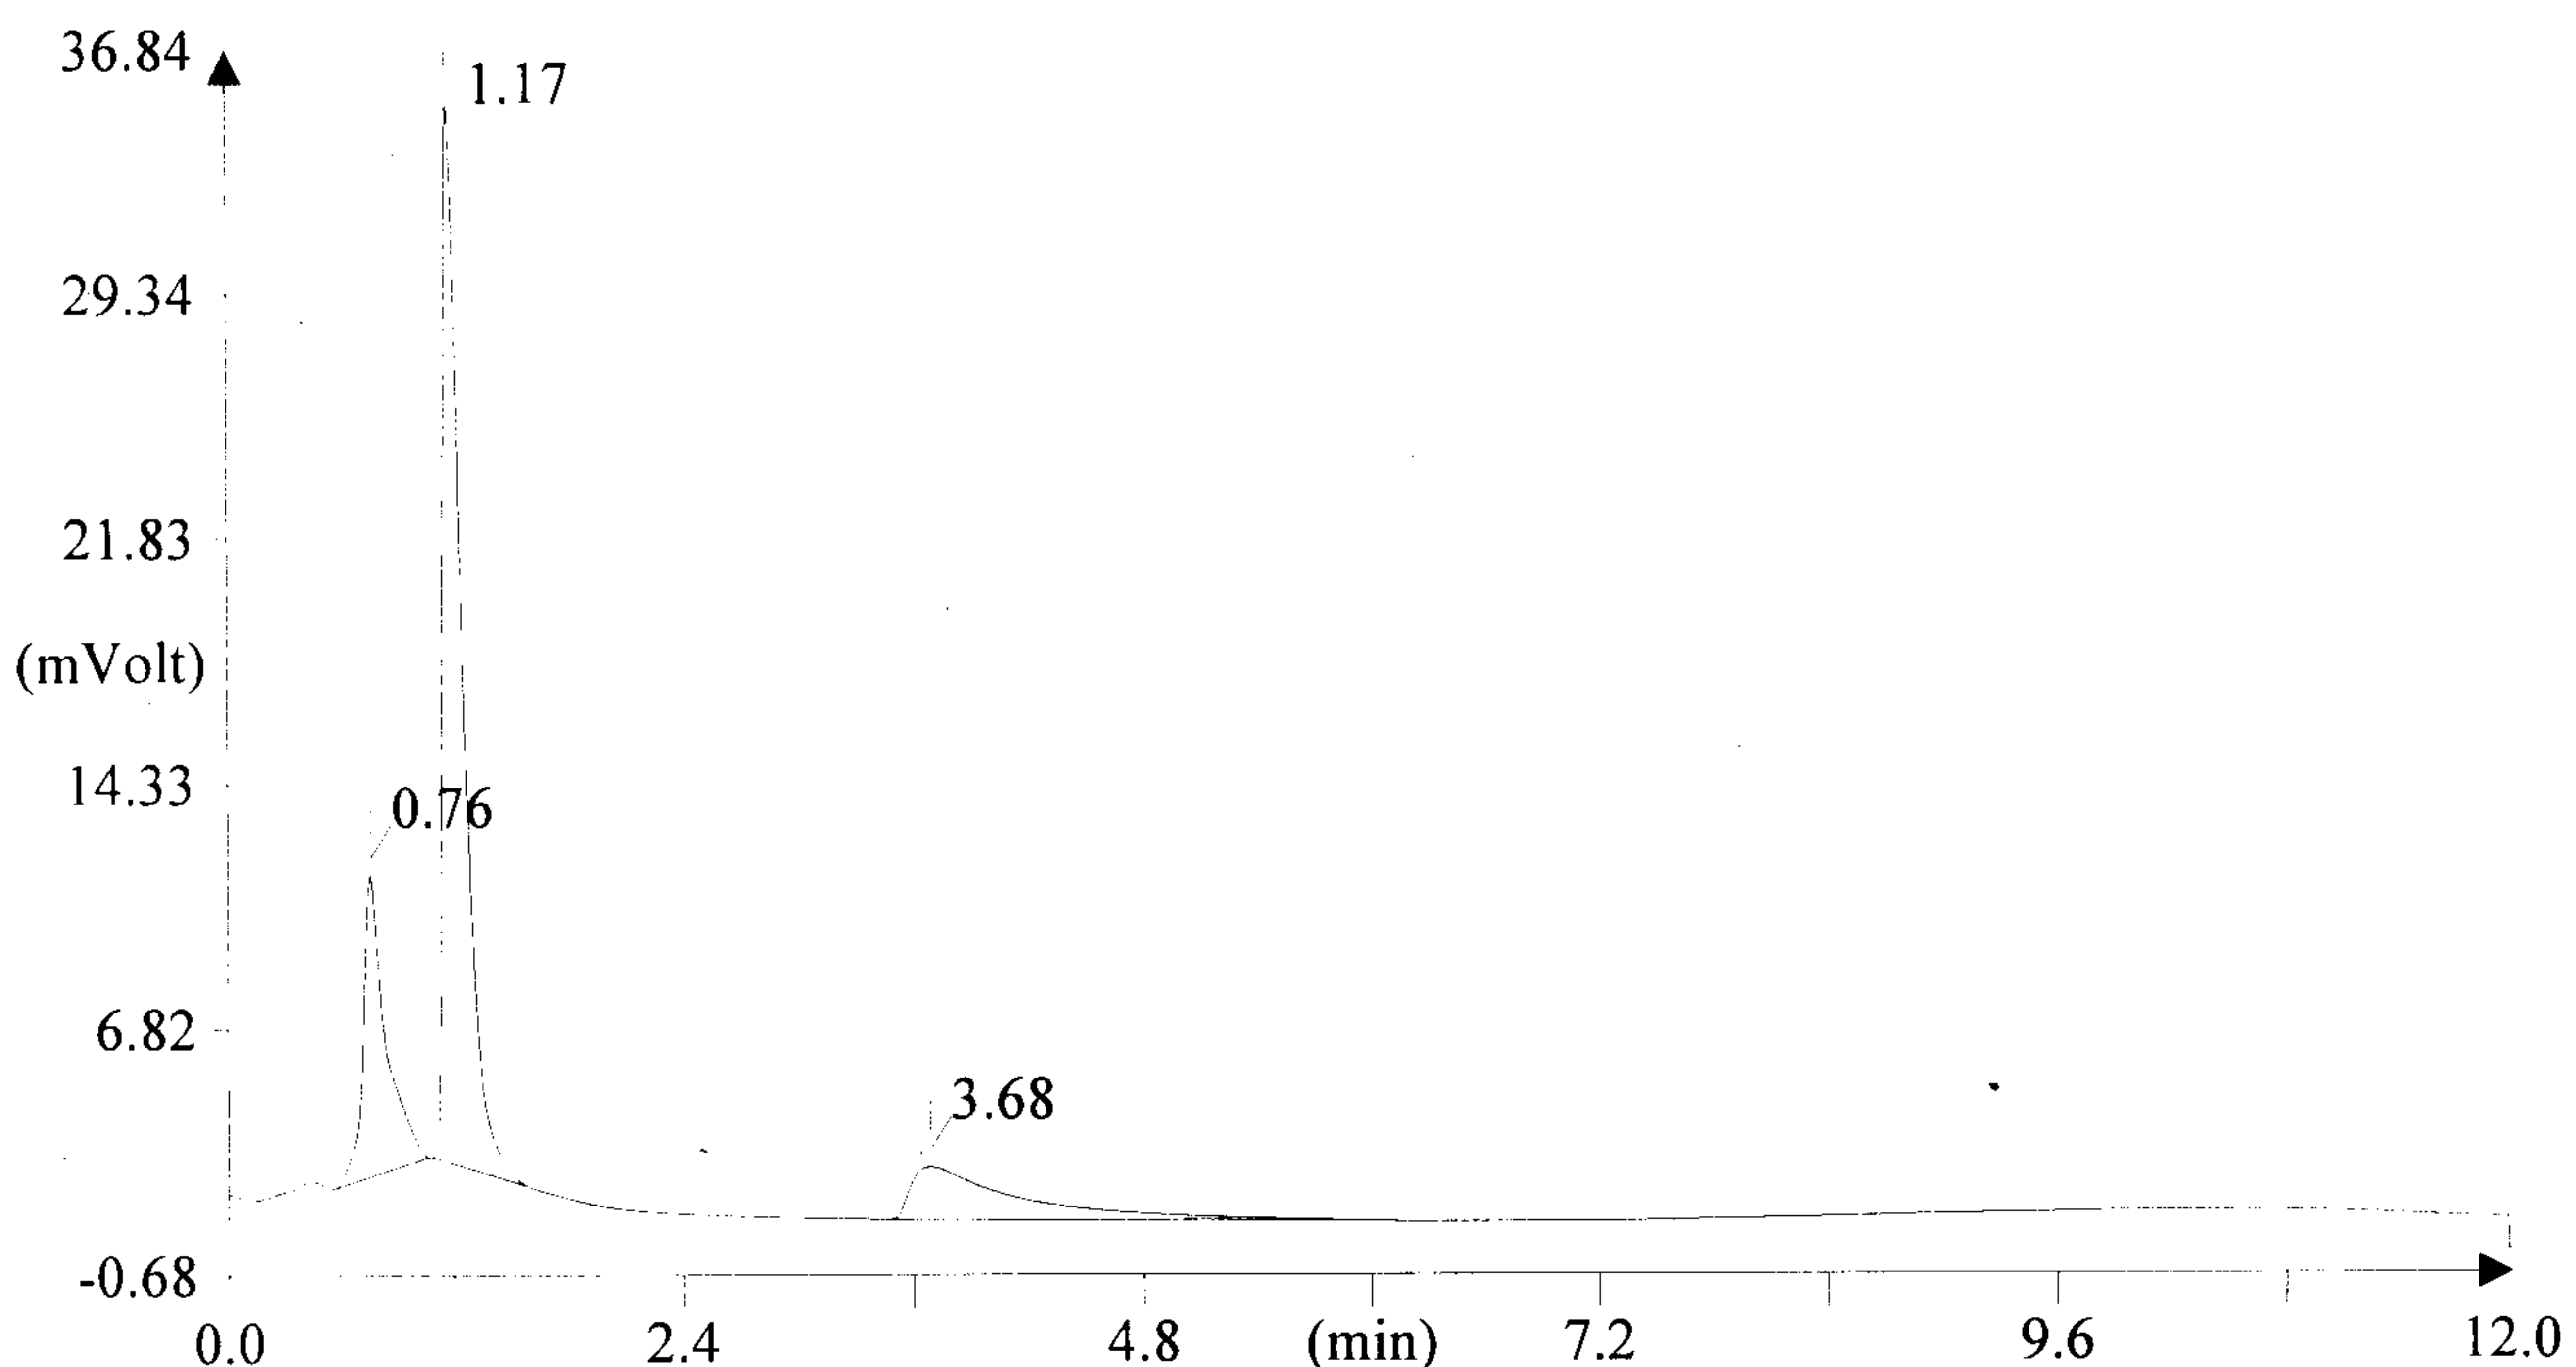

| Element Name | Element % | Ret. Time |
|--------------|-----------|-----------|
| Nitrogen     | 8.07      | 0.76      |
| Carbon       | 62.71     | 1.17      |
| Hydrogen     | 4.03      | 3.68      |

86

# FLASH EA 1112 SERIES CHN REPORT

## SCHOOL OF CHEMISTRY

## UNIVERSITY OF HYDERABAD

Method filename: I:\Program Files\Thermo Finnigan\Eager 300 for EA1112\DATA\Sys\_data\_exa  
Sample ID: MBC-11-7-T2 (# 24)  
Analysis type: UnkNown  
Chromatogram filename: UNK-11032011-24.dat  
Sample weight: .982

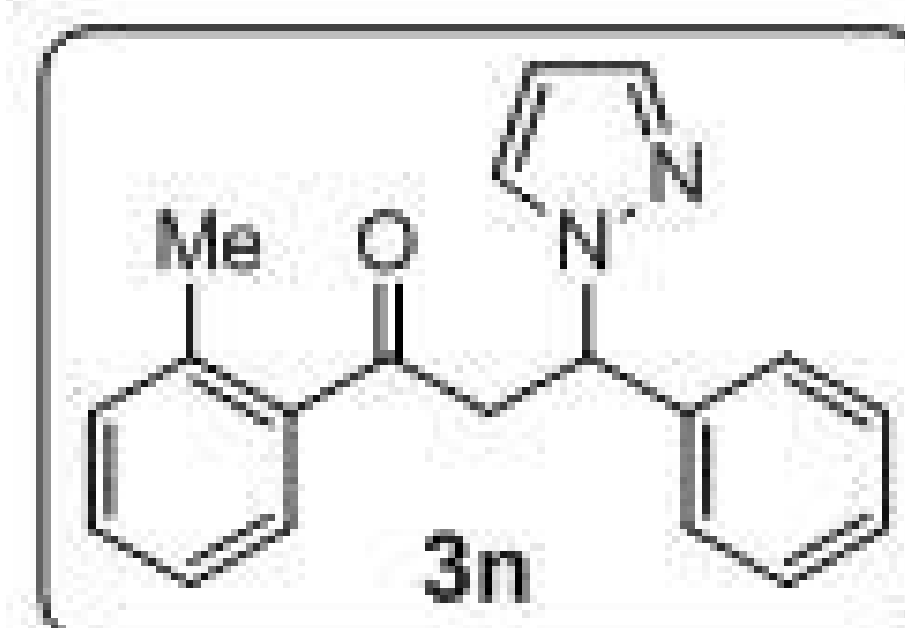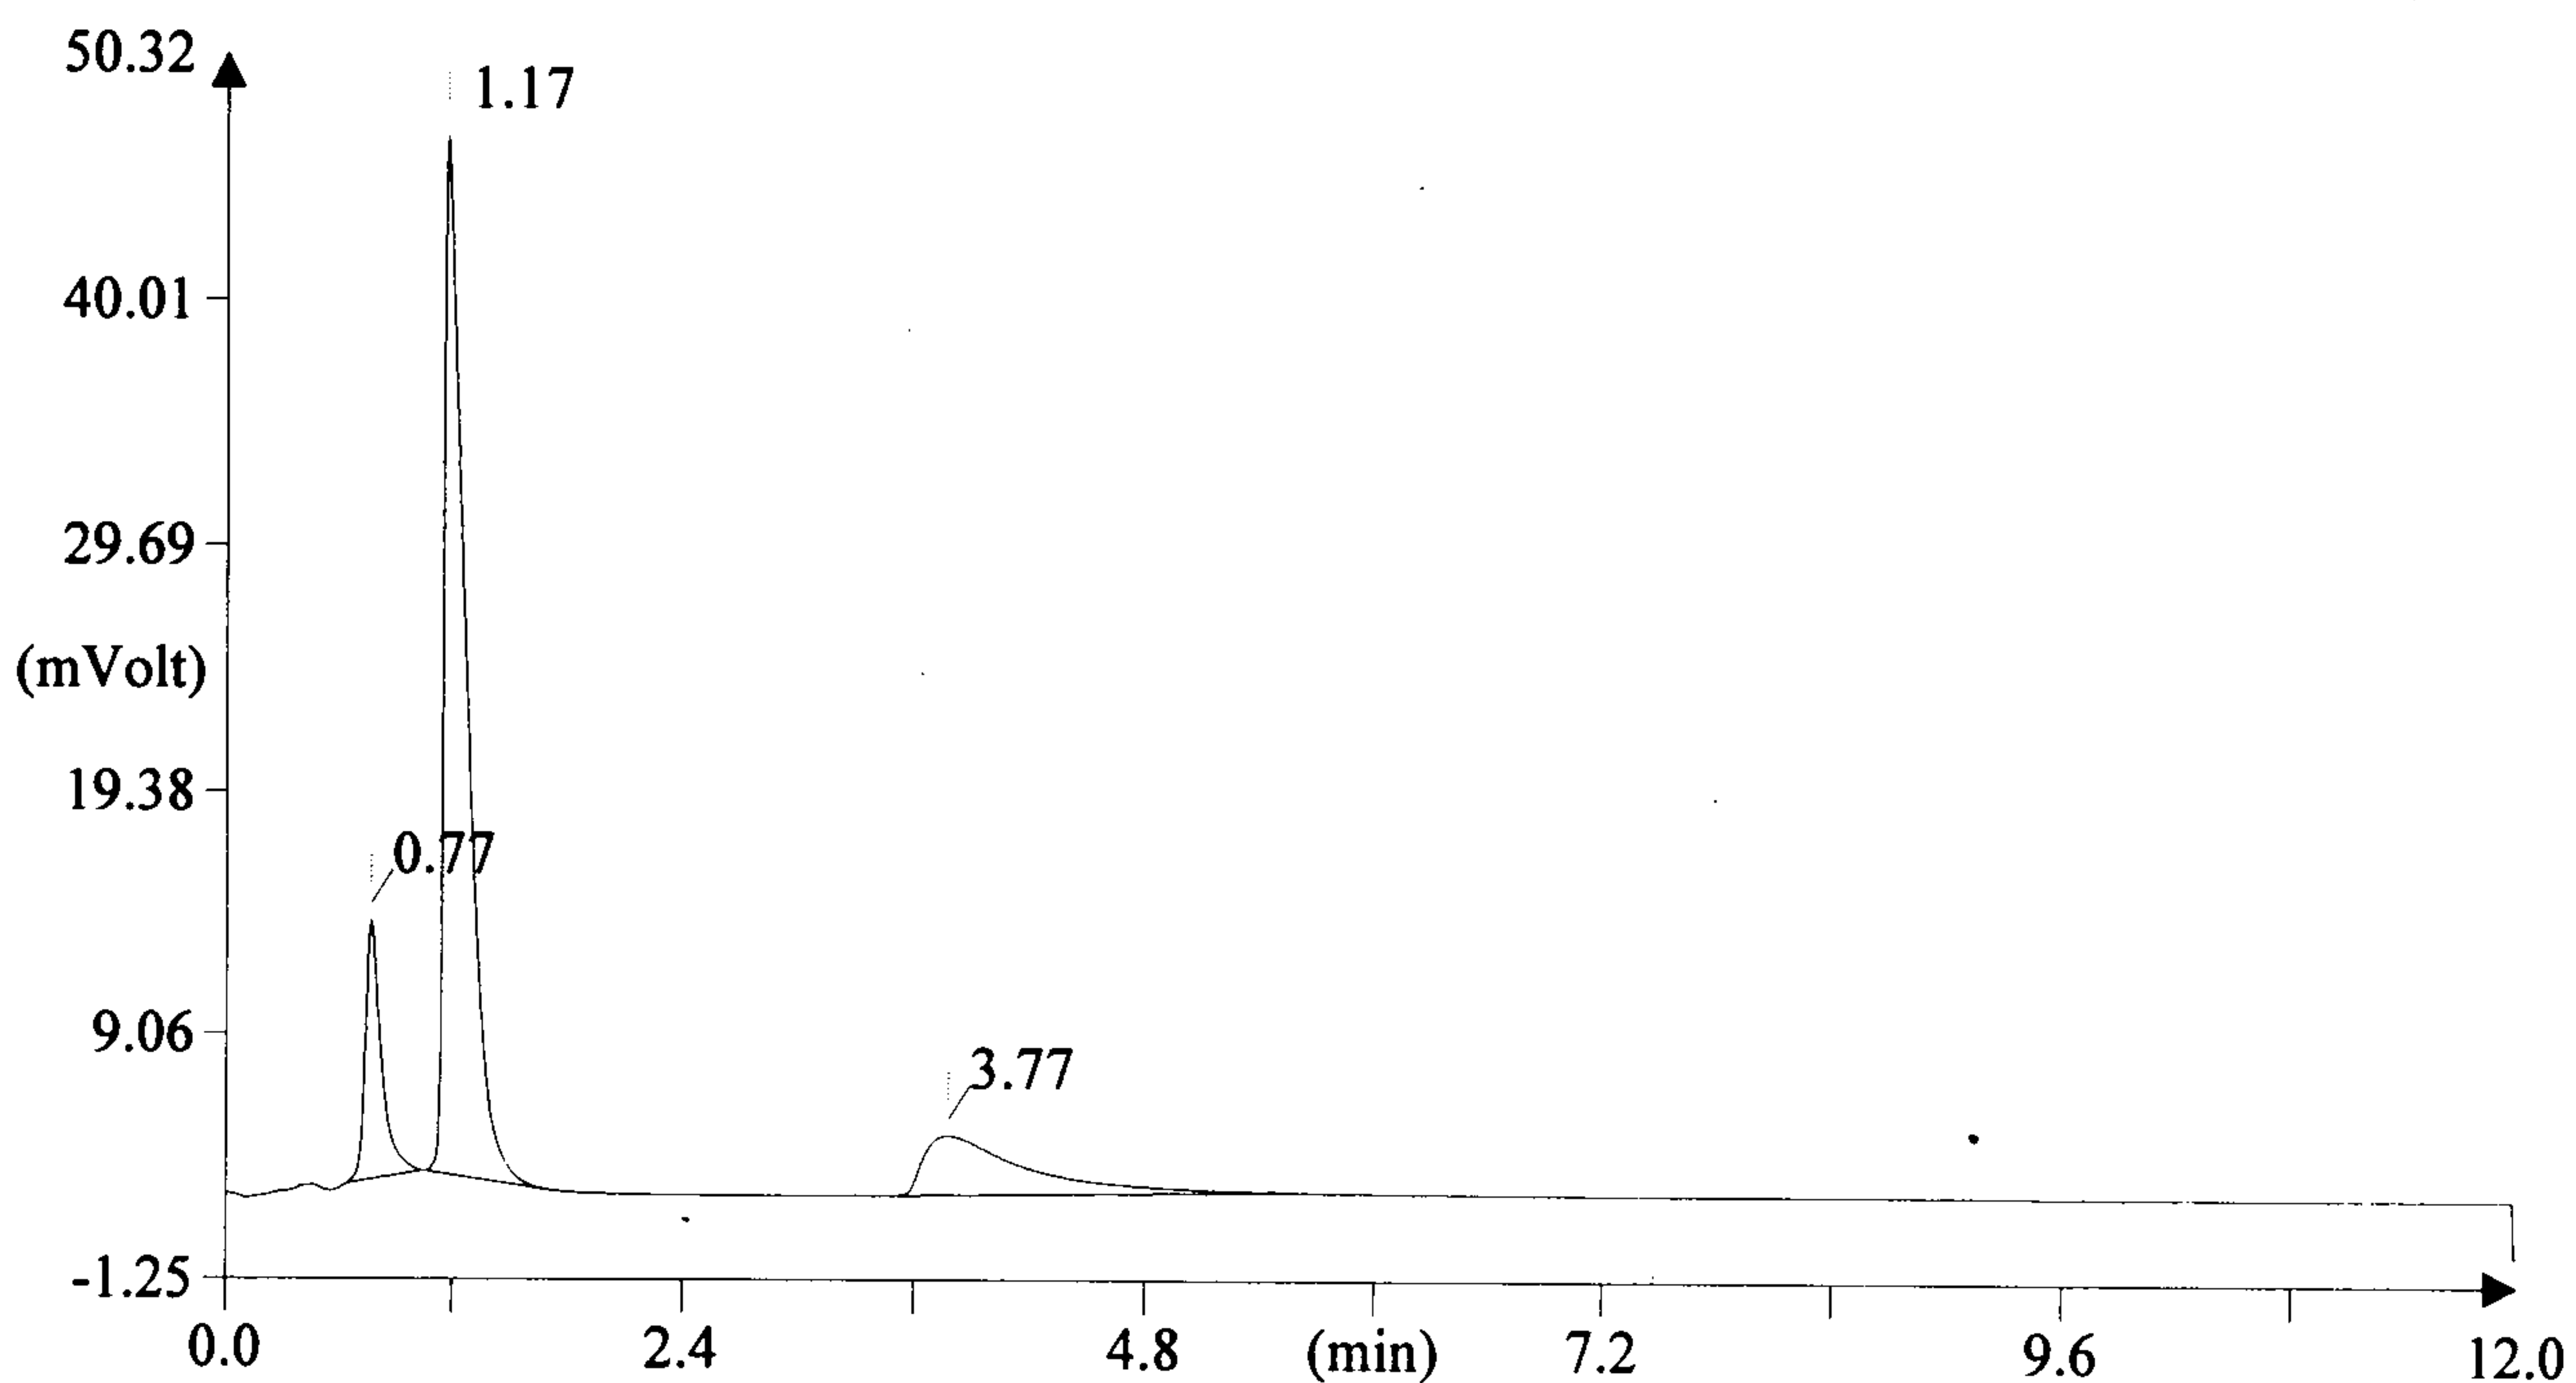

| Element Name | Element % | Ret. Time |
|--------------|-----------|-----------|
| Nitrogen     | 9. 58     | 0. 77     |
| Carbon       | 78. 66    | 1. 17     |
| Hydrogen     | 6. 21     | 3. 77     |





# FLASH EA 1112 SERIES CHN REPORT

## SCHOOL OF CHEMISTRY

## UNIVERSITY OF HYDERABAD

Method filename: C:\Program Files\Thermo Finnigan\Eager 300 for EA1112\DATA\Sys\_data\_ex  
Sample ID: MBC-11-4 (# 16)  
Analysis type: UnkNown  
Chromatogram filename: UNK-28122010-16.dat  
Sample weight: 1.265

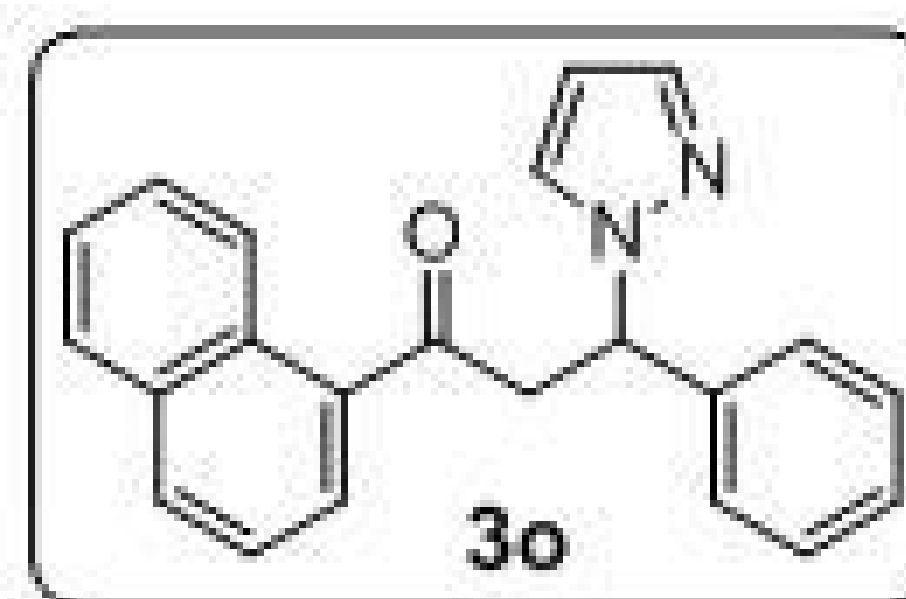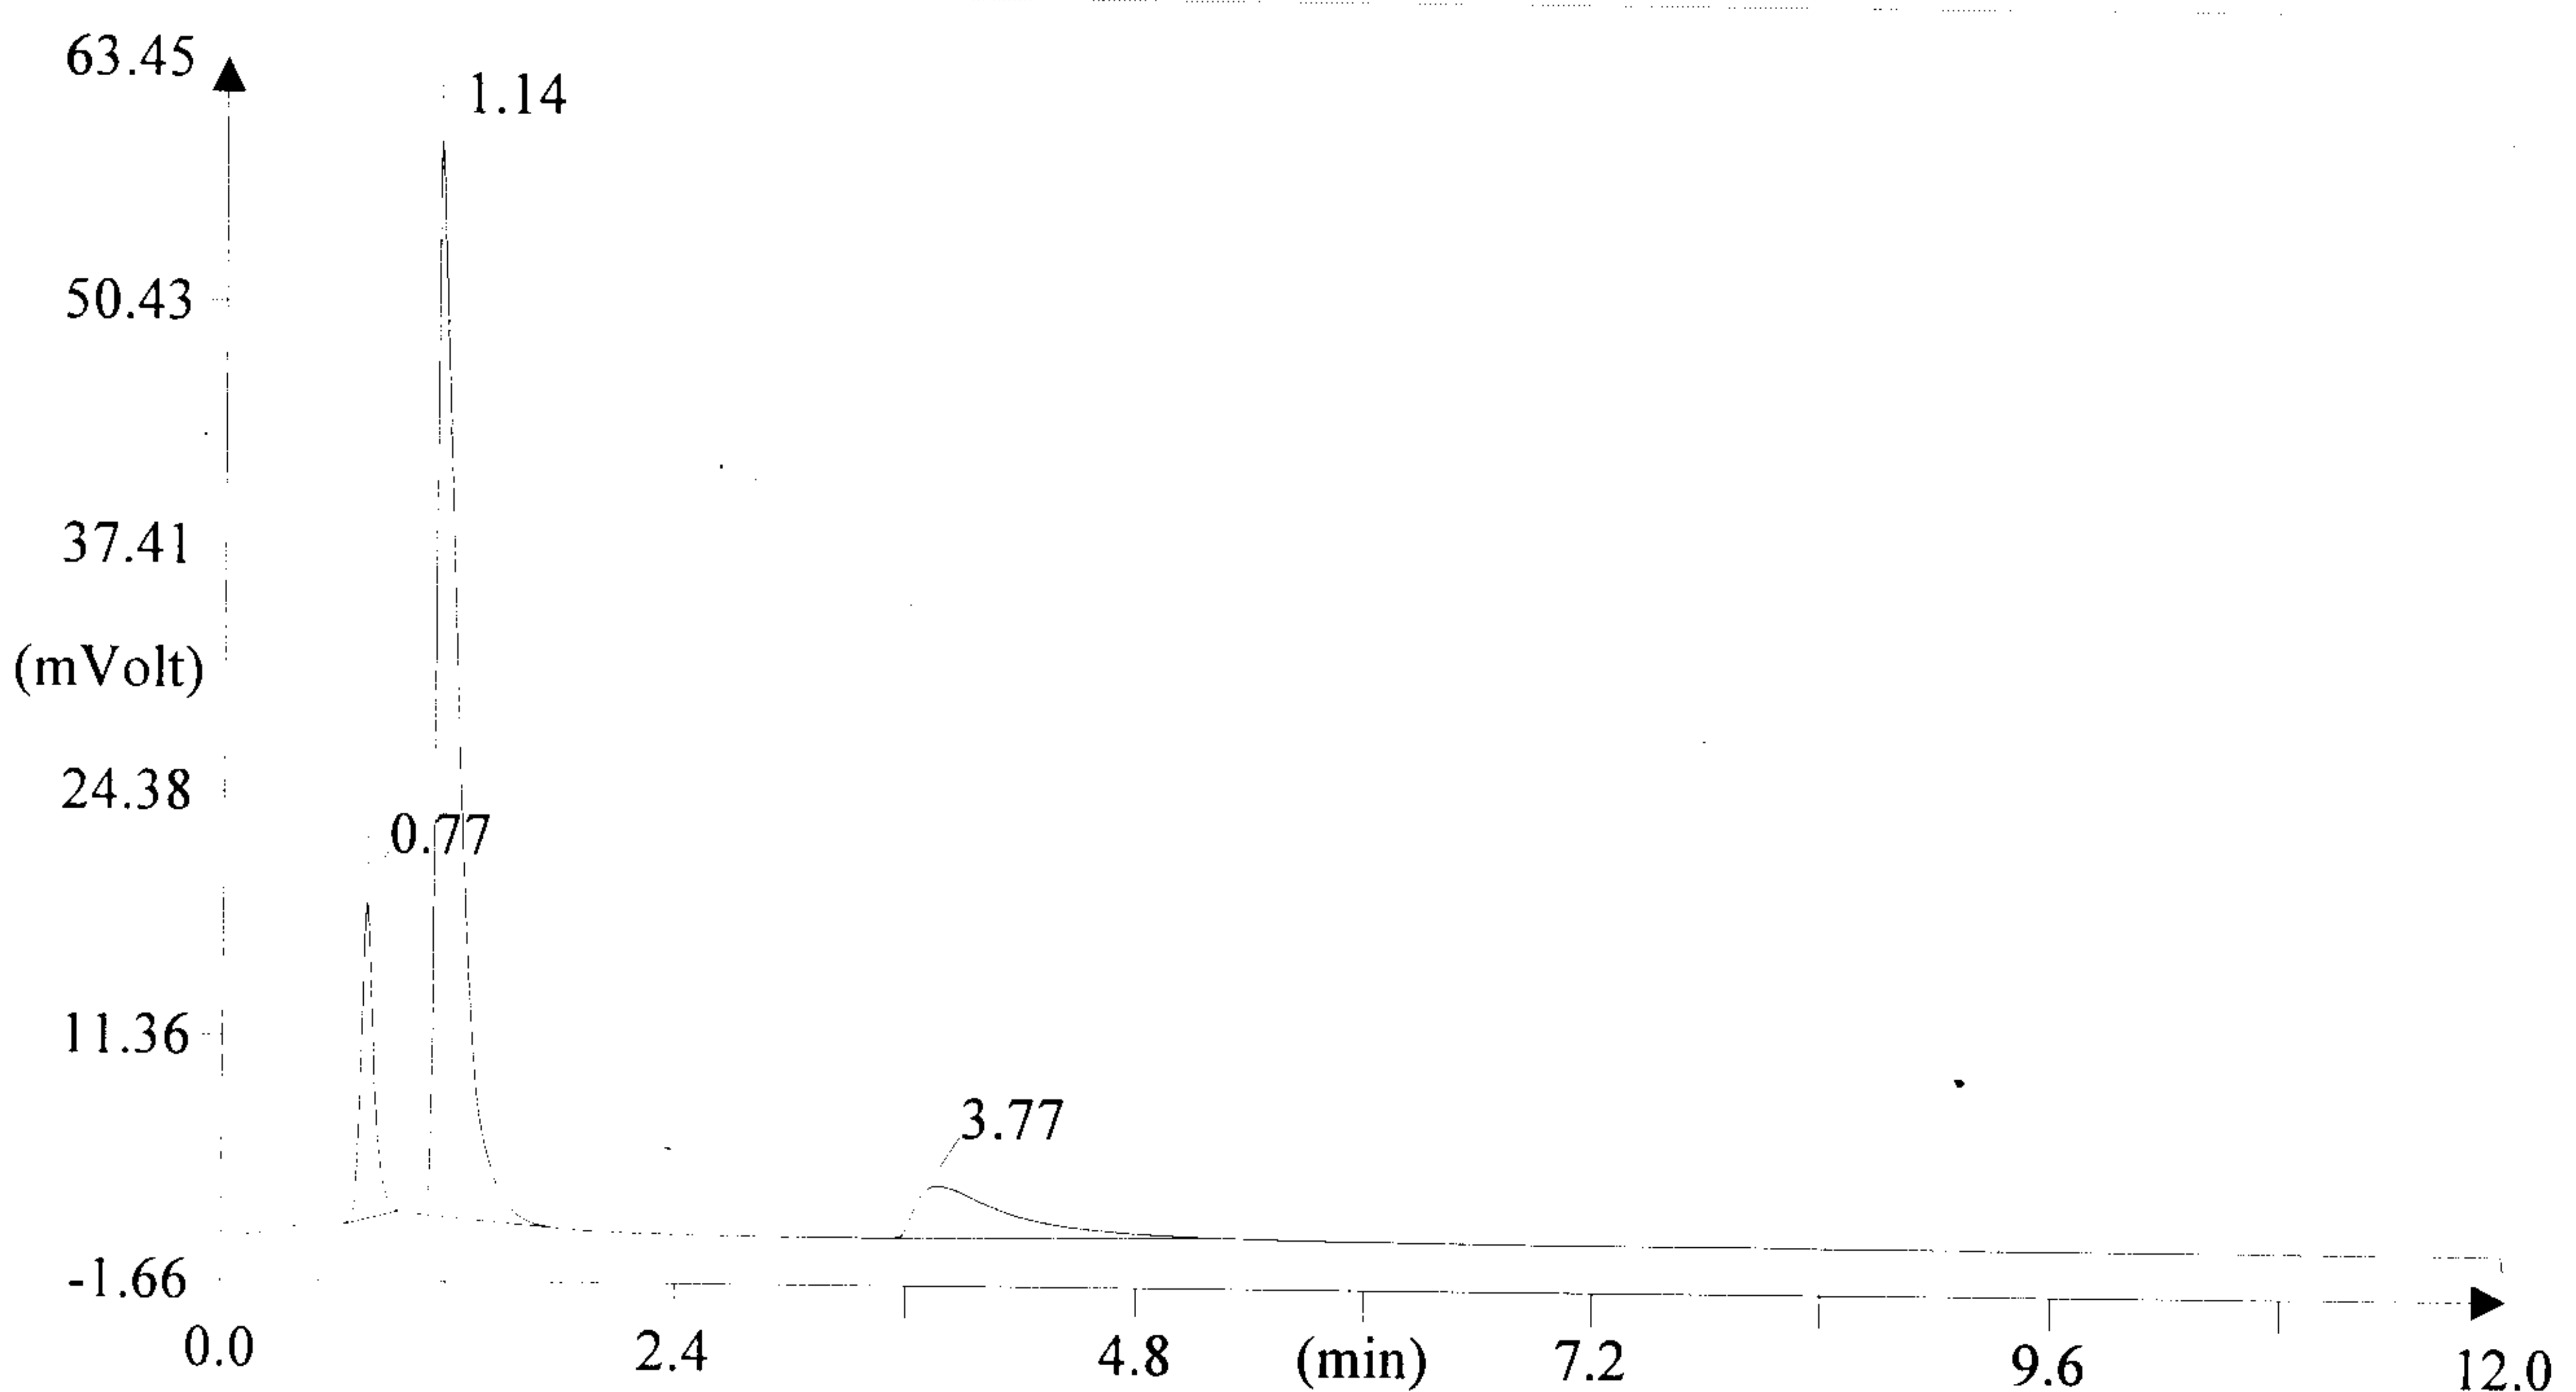

| Element Name | Element % | Ret. Time |
|--------------|-----------|-----------|
| Nitrogen     | 8.49      | 0.77      |
| Carbon       | 80.75     | 1.14      |
| Hydrogen     | 5.51      | 3.77      |

BSH

FLASH EA 1112 SERIES CHN REPORT  
SCHOOL OF CHEMISTRY  
UNIVERSITY OF HYDERABAD

Method filename: I:\Program Files\Thermo Finnigan\Eager 300 for EA1112\DATA\Sys\_data\_exa  
Sample ID: MBC-11-6-T2 (# 28)  
Analysis type: UnkNown  
Chromatogram filename: UNK-11032011-28.dat  
Sample weight: 1.138

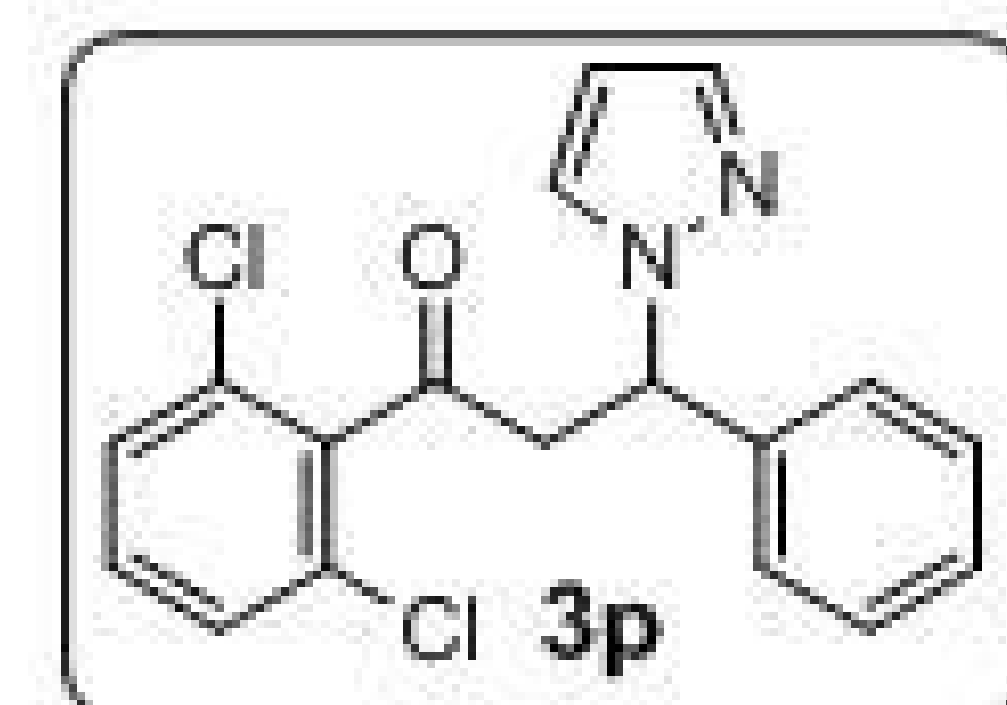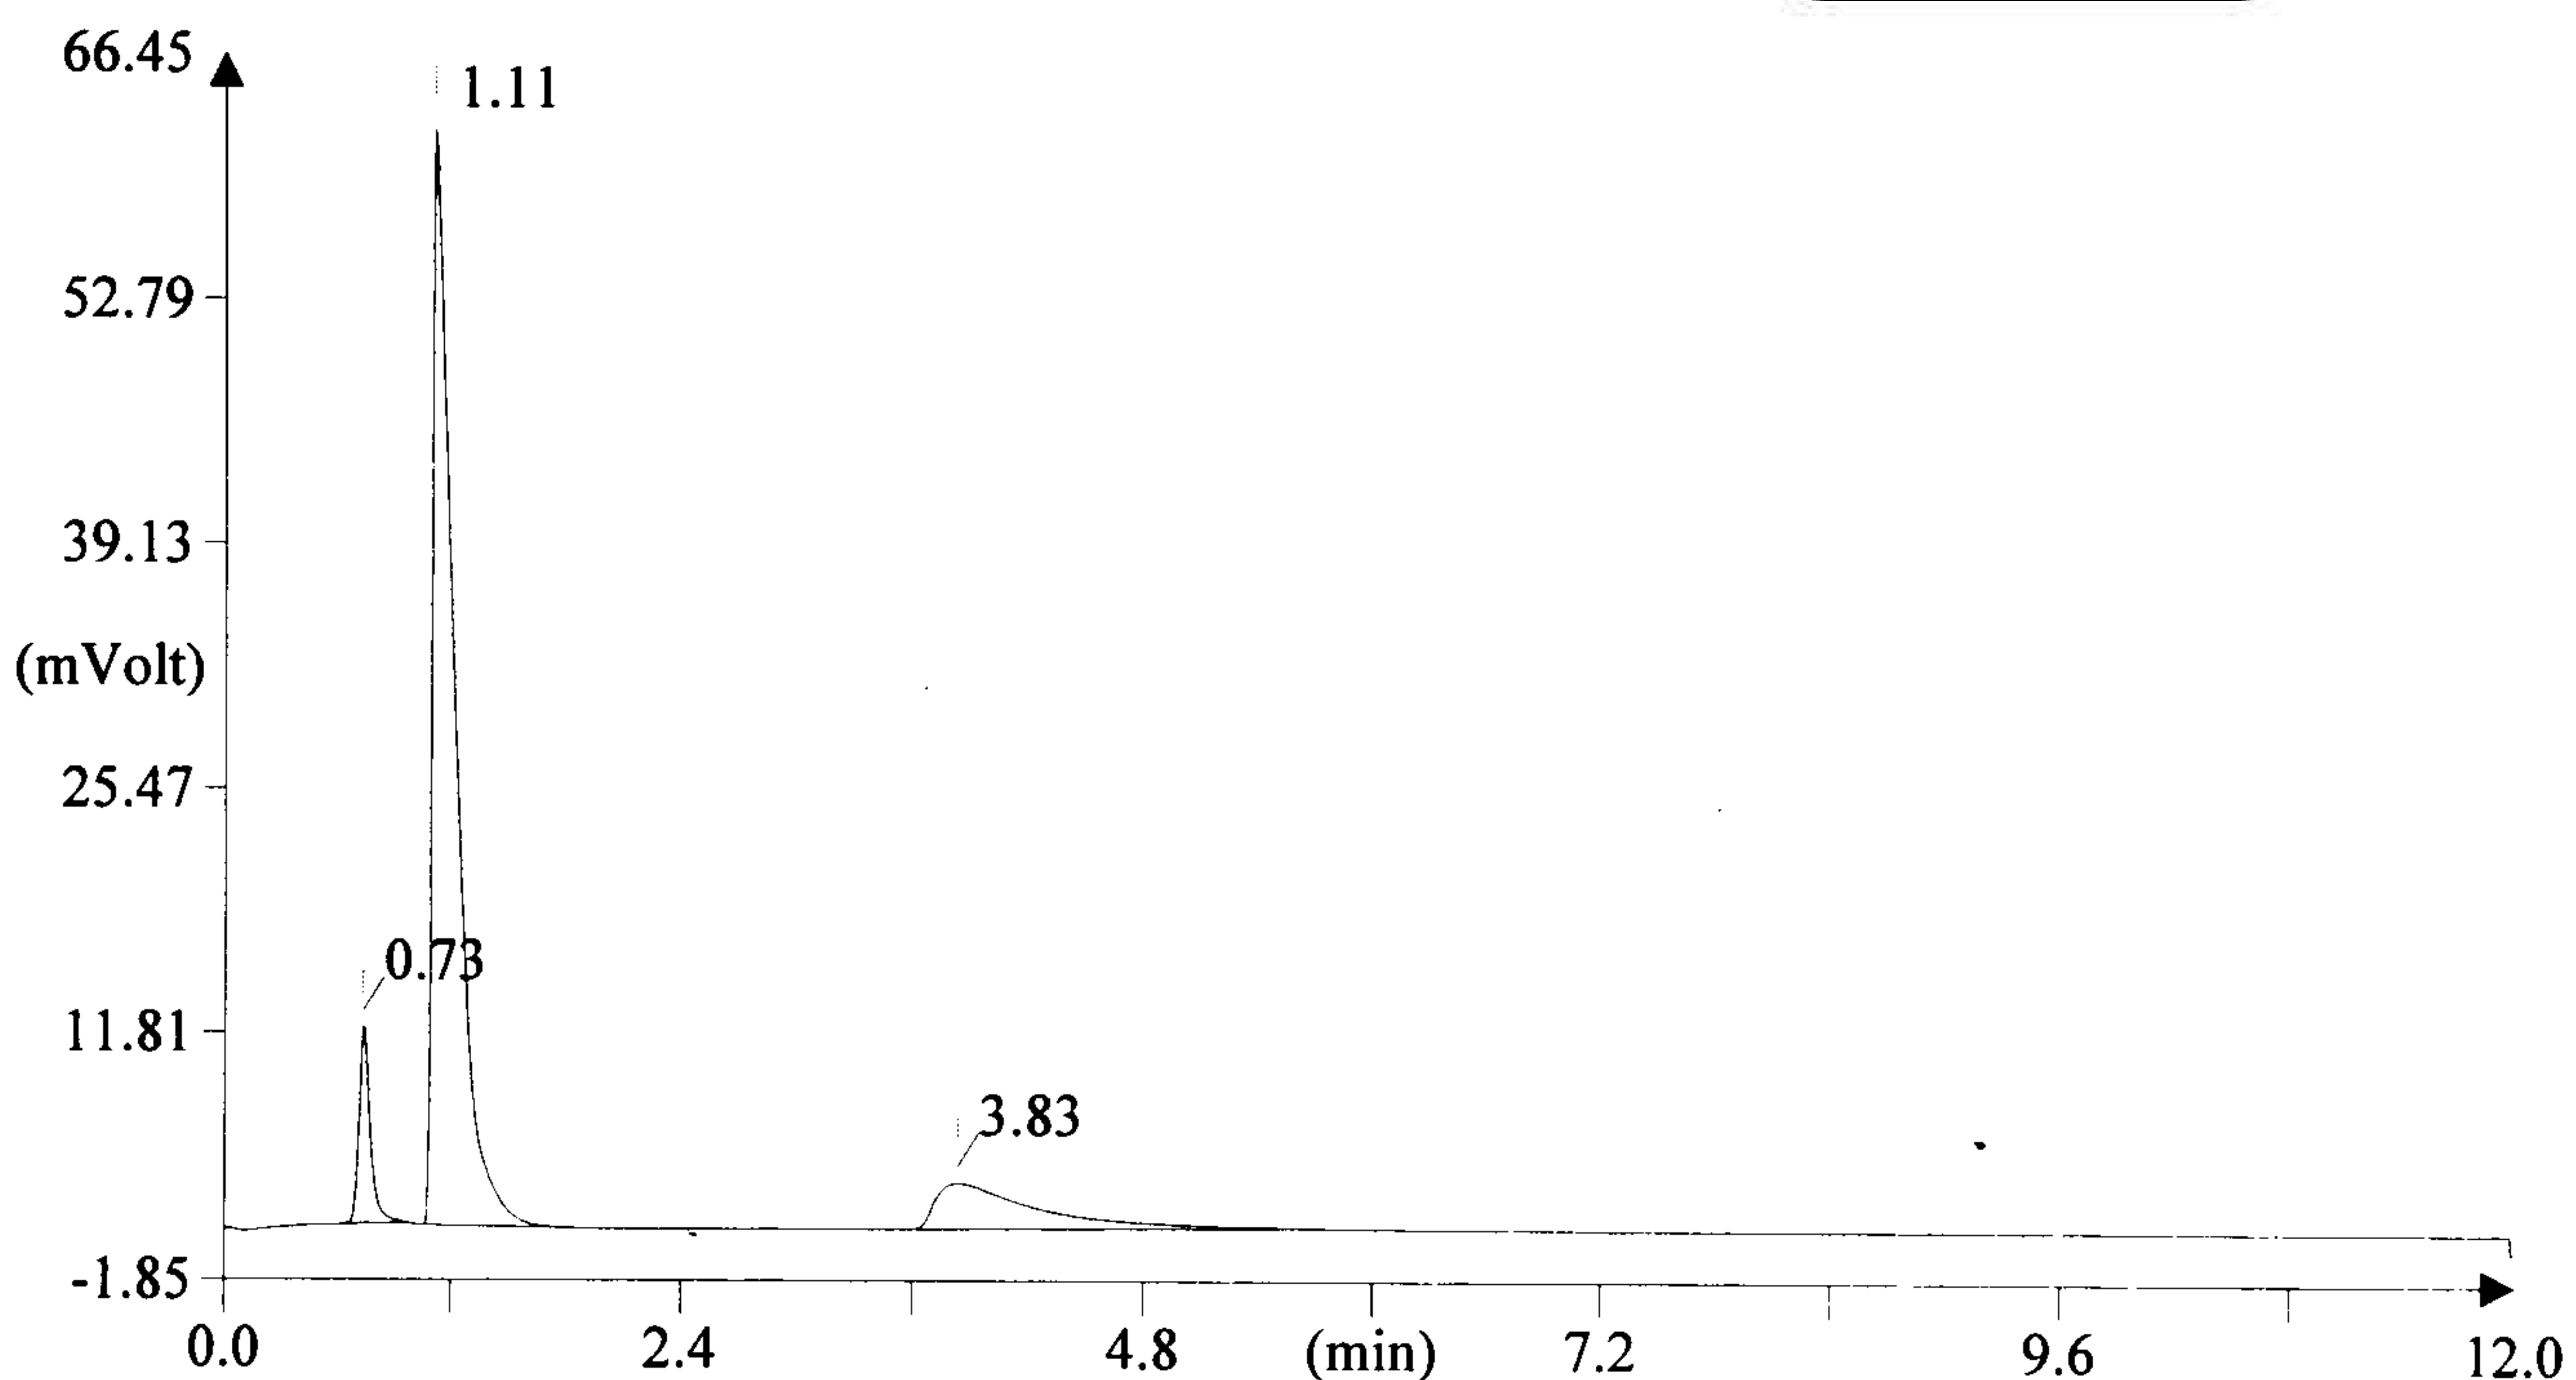

| Element Name | Element % | Ret. Time |
|--------------|-----------|-----------|
| Nitrogen     | 8.21      | 0.73      |
| Carbon       | 62.51     | 1.11      |
| Hydrogen     | 4.15      | 3.83      |

*OB*

# FLASH EA 1112 SERIES CHN REPORT

## SCHOOL OF CHEMISTRY

## UNIVERSITY OF HYDERABAD

Method filename: I:\Program Files\Thermo Finnigan\Eager 300 for EA1112\DATA\Sys\_data\_exa  
 Sample ID: MBC-11-60-T2 (# 3)  
 Analysis type: UnkNown  
 Chromatogram filename: UNK-06042011-3.dat  
 Sample weight: 1.132

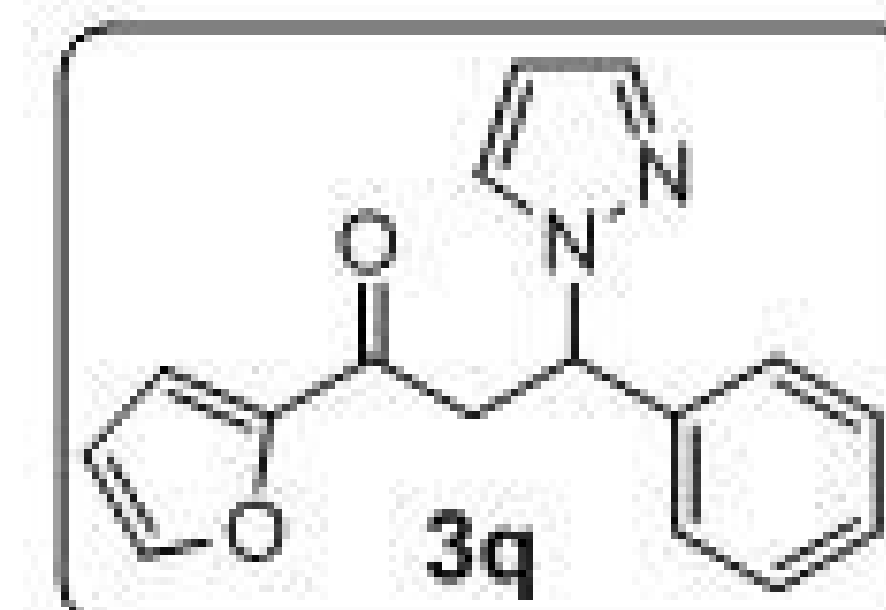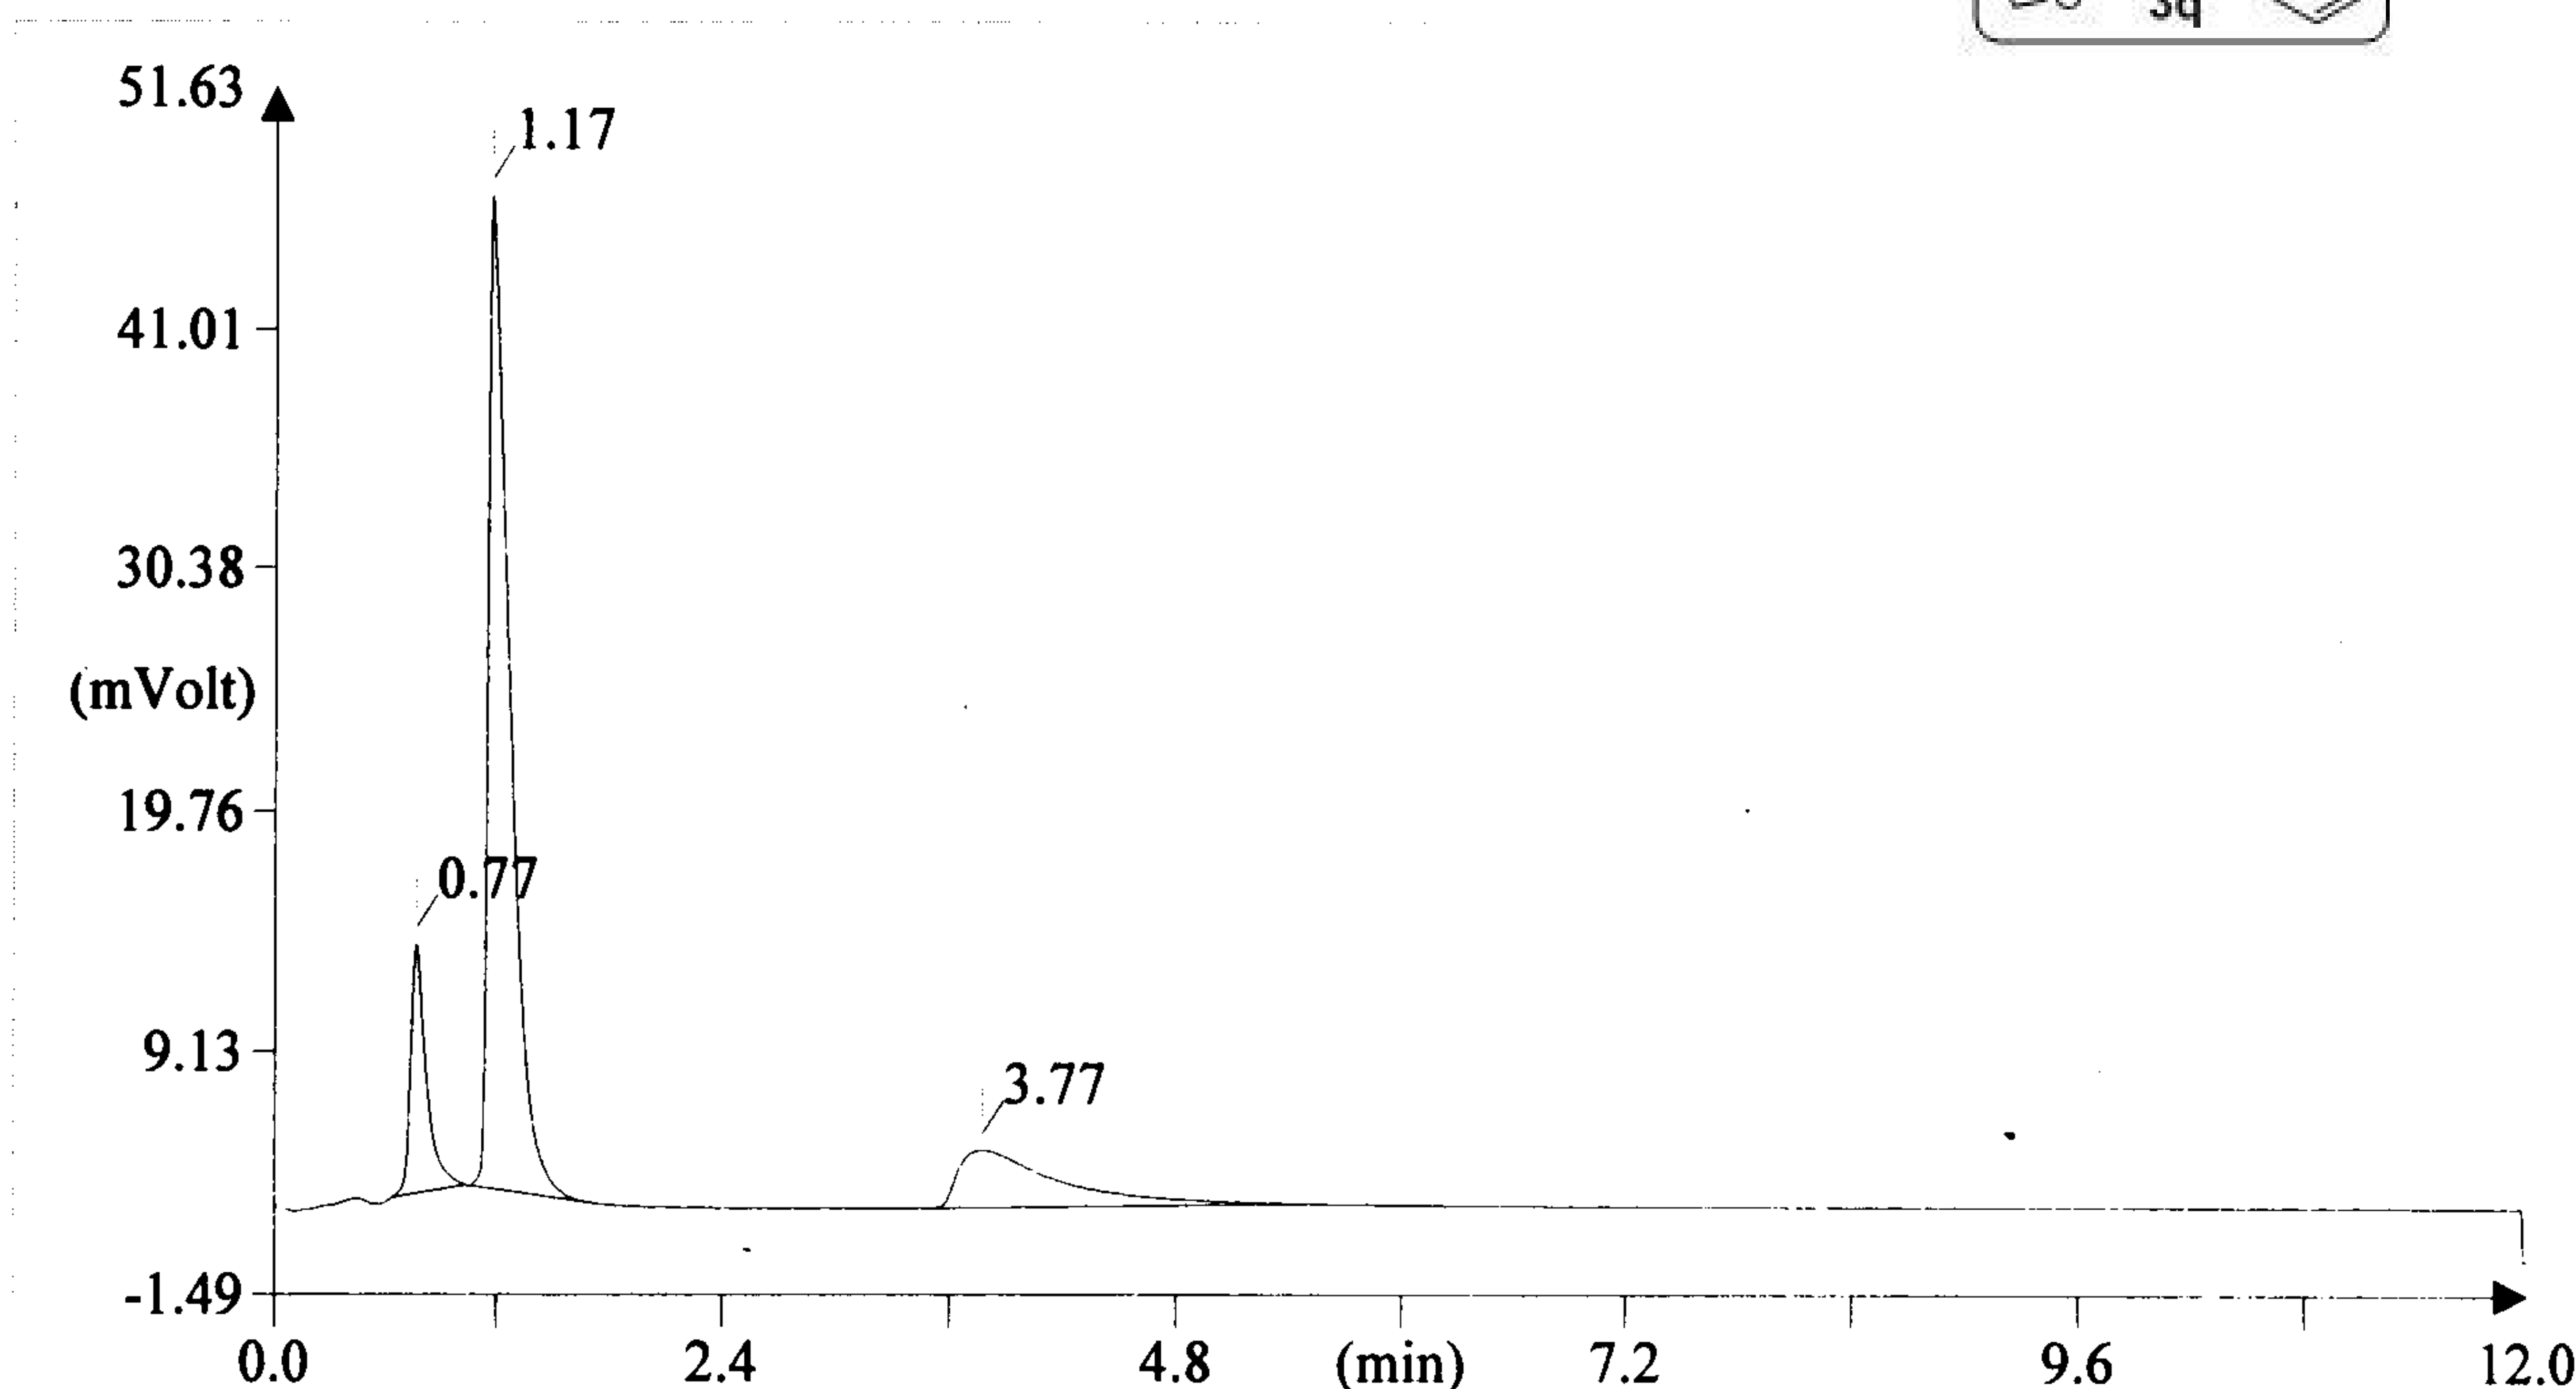

| Element Name | Element % | Ret. Time |
|--------------|-----------|-----------|
| Nitrogen     | 10. 41    | 0. 77     |
| Carbon       | 72. 28    | 1. 17     |
| Hydrogen     | 5. 36     | 3. 77     |

*Handwritten signature*



FLASH EA 1112 SERIES CHN REPORT  
SCHOOL OF CHEMISTRY  
UNIVERSITY OF HYDERABAD

Method filename: I:\Program Files\Thermo Finnigan\Eager 300 for EA1112\DATA\Sys\_data\_exa  
Sample ID: MBC-11-59-T4 (# 4)  
Analysis type: UnkNown  
Chromatogram filename: UNK-06042011-4.dat  
Sample weight: 1.314

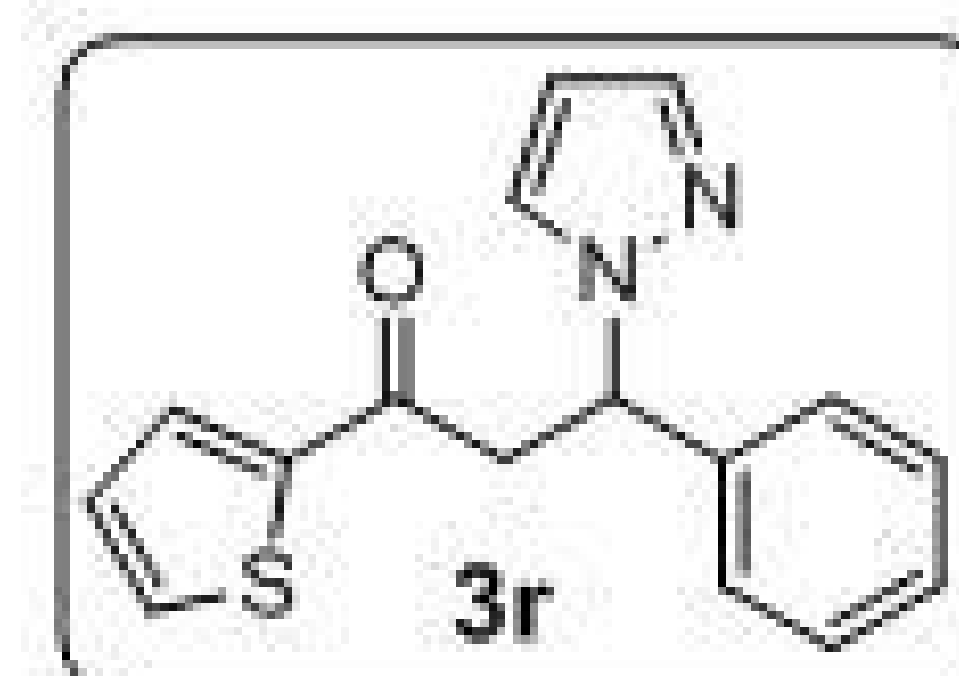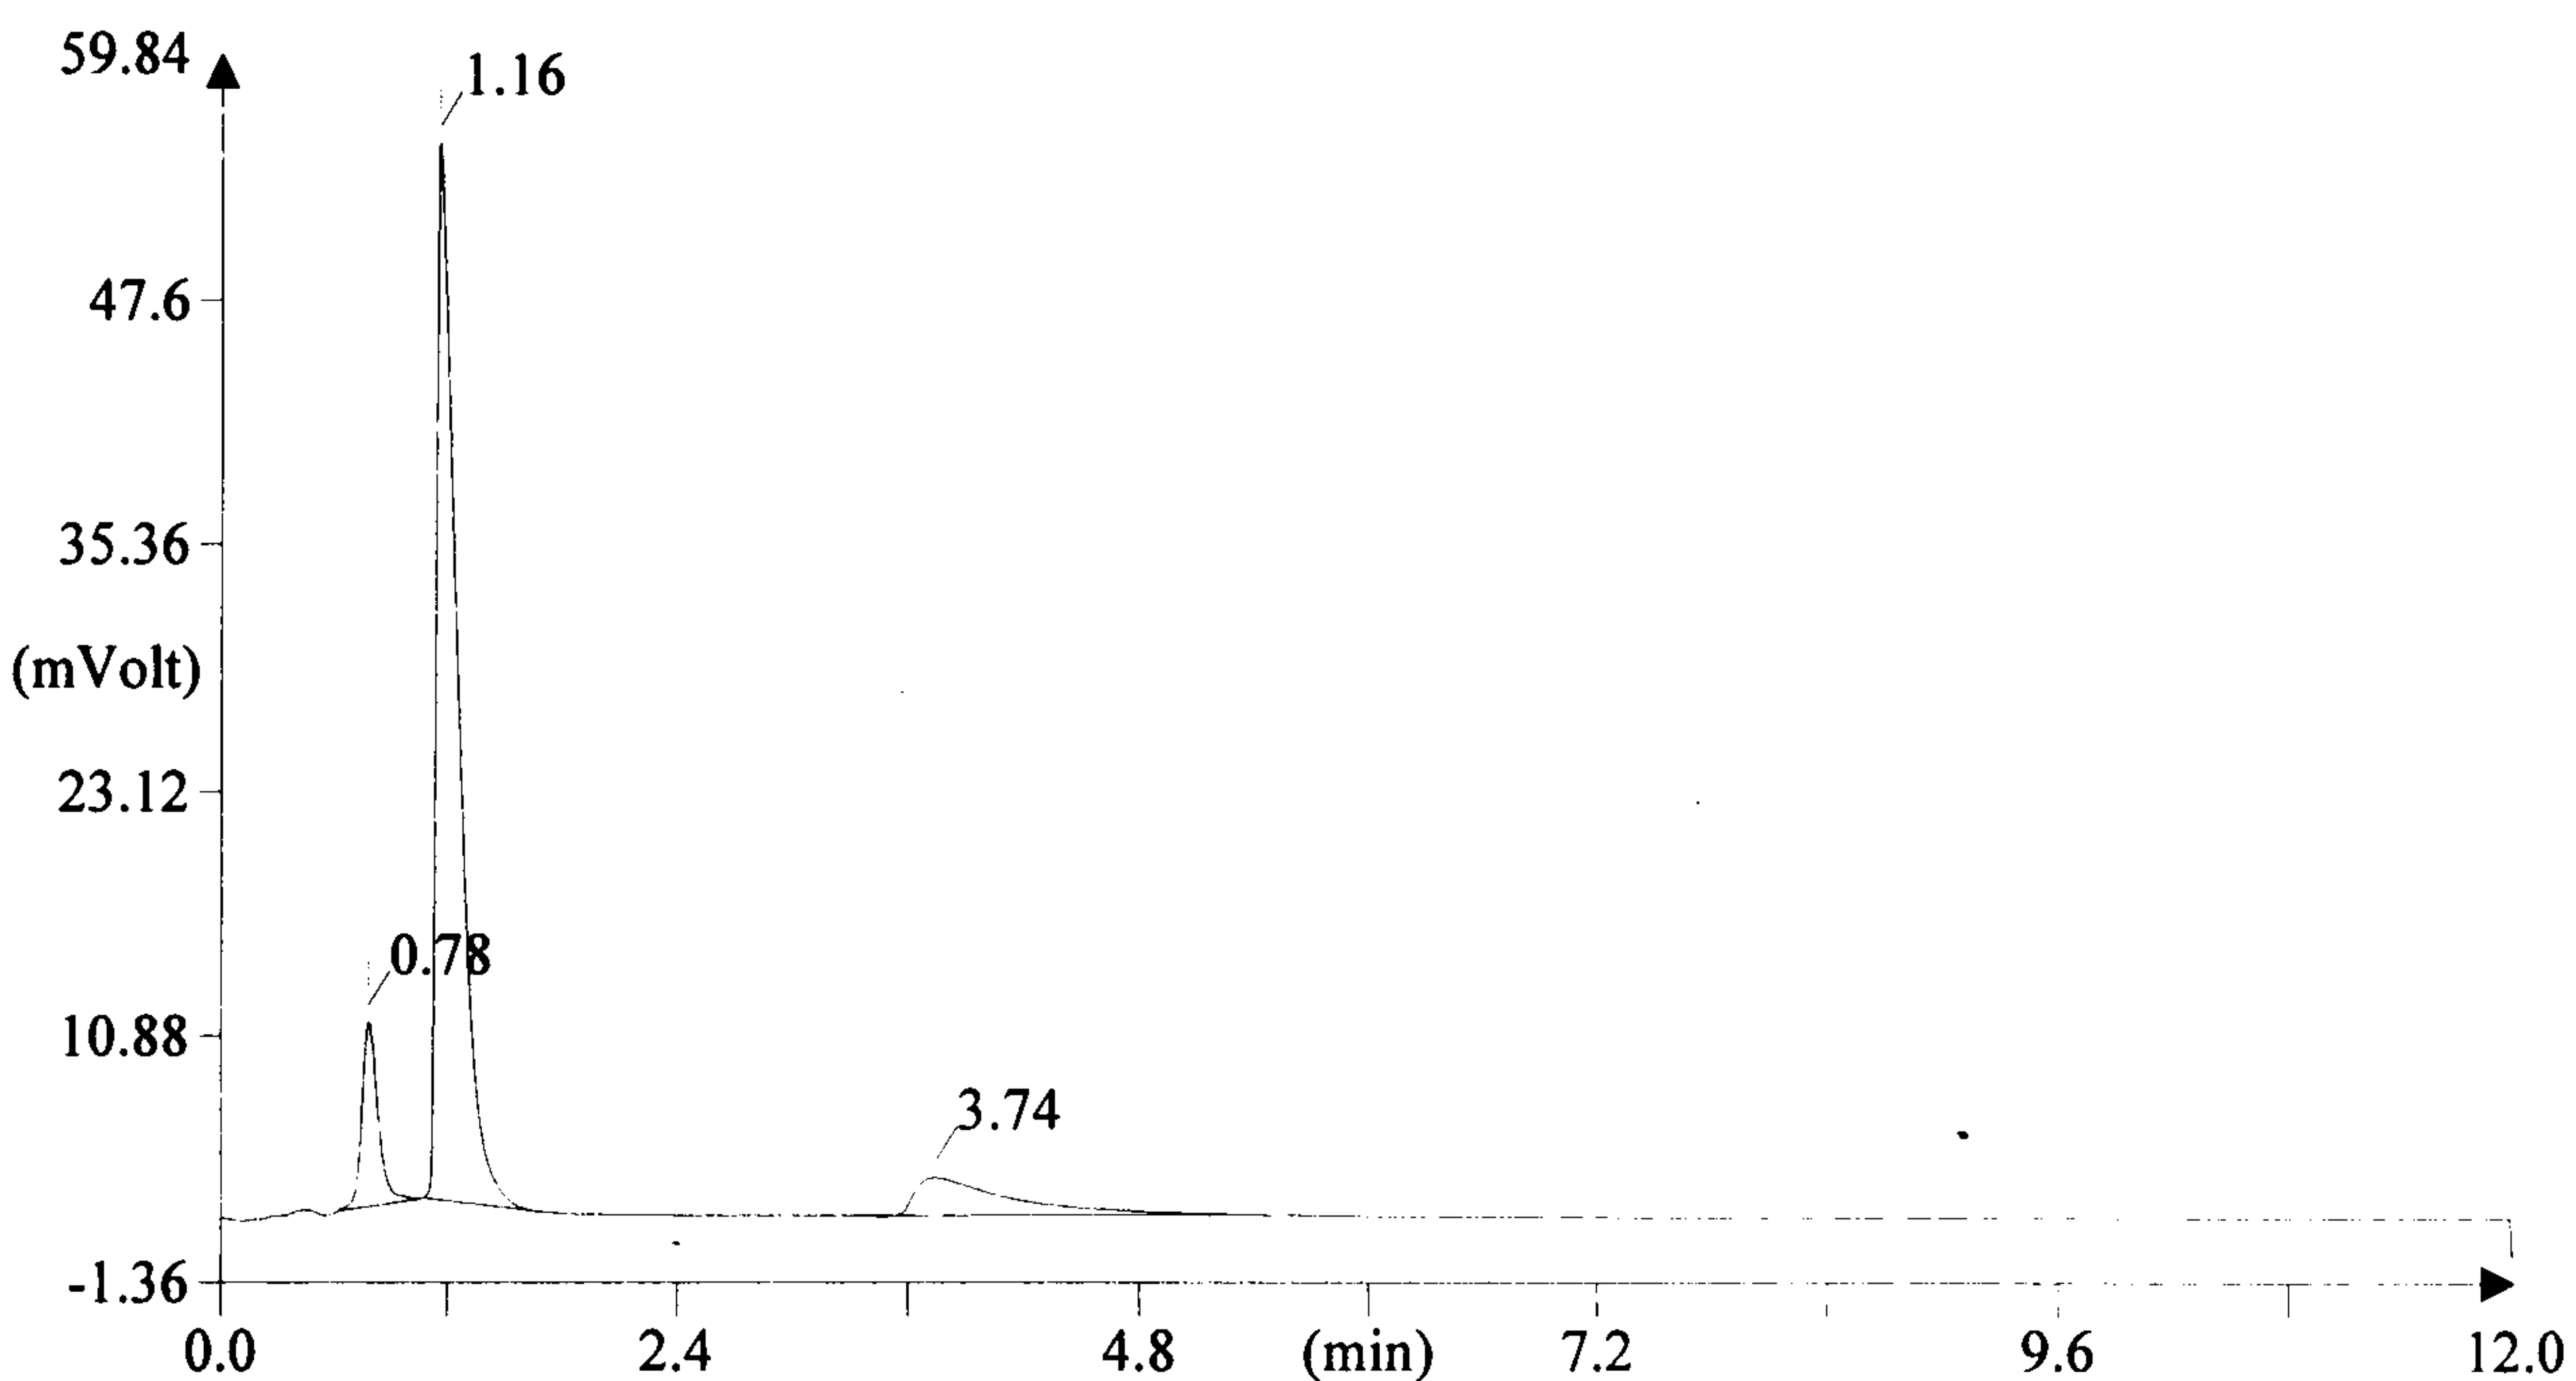

| Element Name | Element % | Ret. Time |
|--------------|-----------|-----------|
| Nitrogen     | 9. 86     | 0. 78     |
| Carbon       | 68. 15    | 1. 16     |
| Hydrogen     | 5. 12     | 3. 74     |





# FLASH EA 1112 SERIES CHN REPORT

## SCHOOL OF CHEMISTRY

## UNIVERSITY OF HYDERABAD

Method filename: I:\Program Files\Thermo Finnigan\Eager 300 for EA1112\DATA\Sys\_data\_exa  
 Sample ID: MBC-11-15 (# 2)  
 Analysis type: UnkNown  
 Chromatogram filename: UNK-28022011-2.dat  
 Sample weight: 1.109

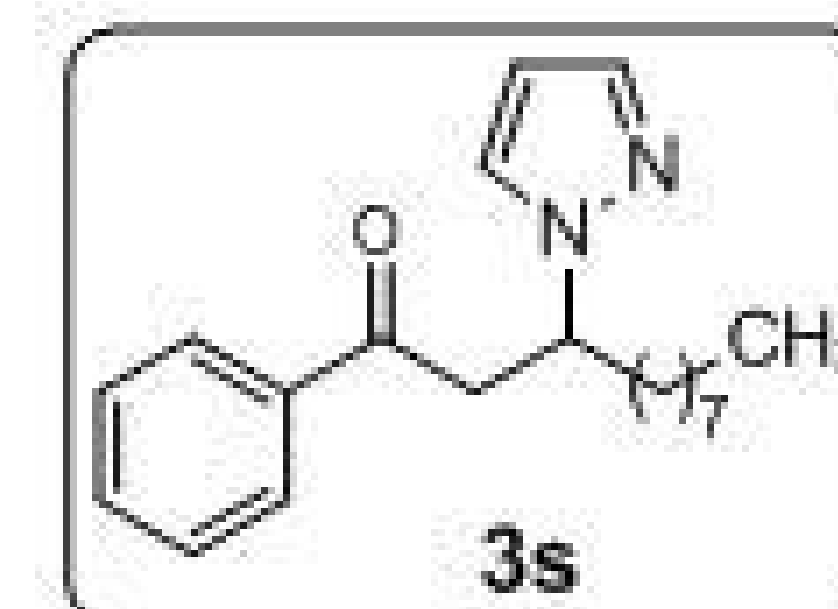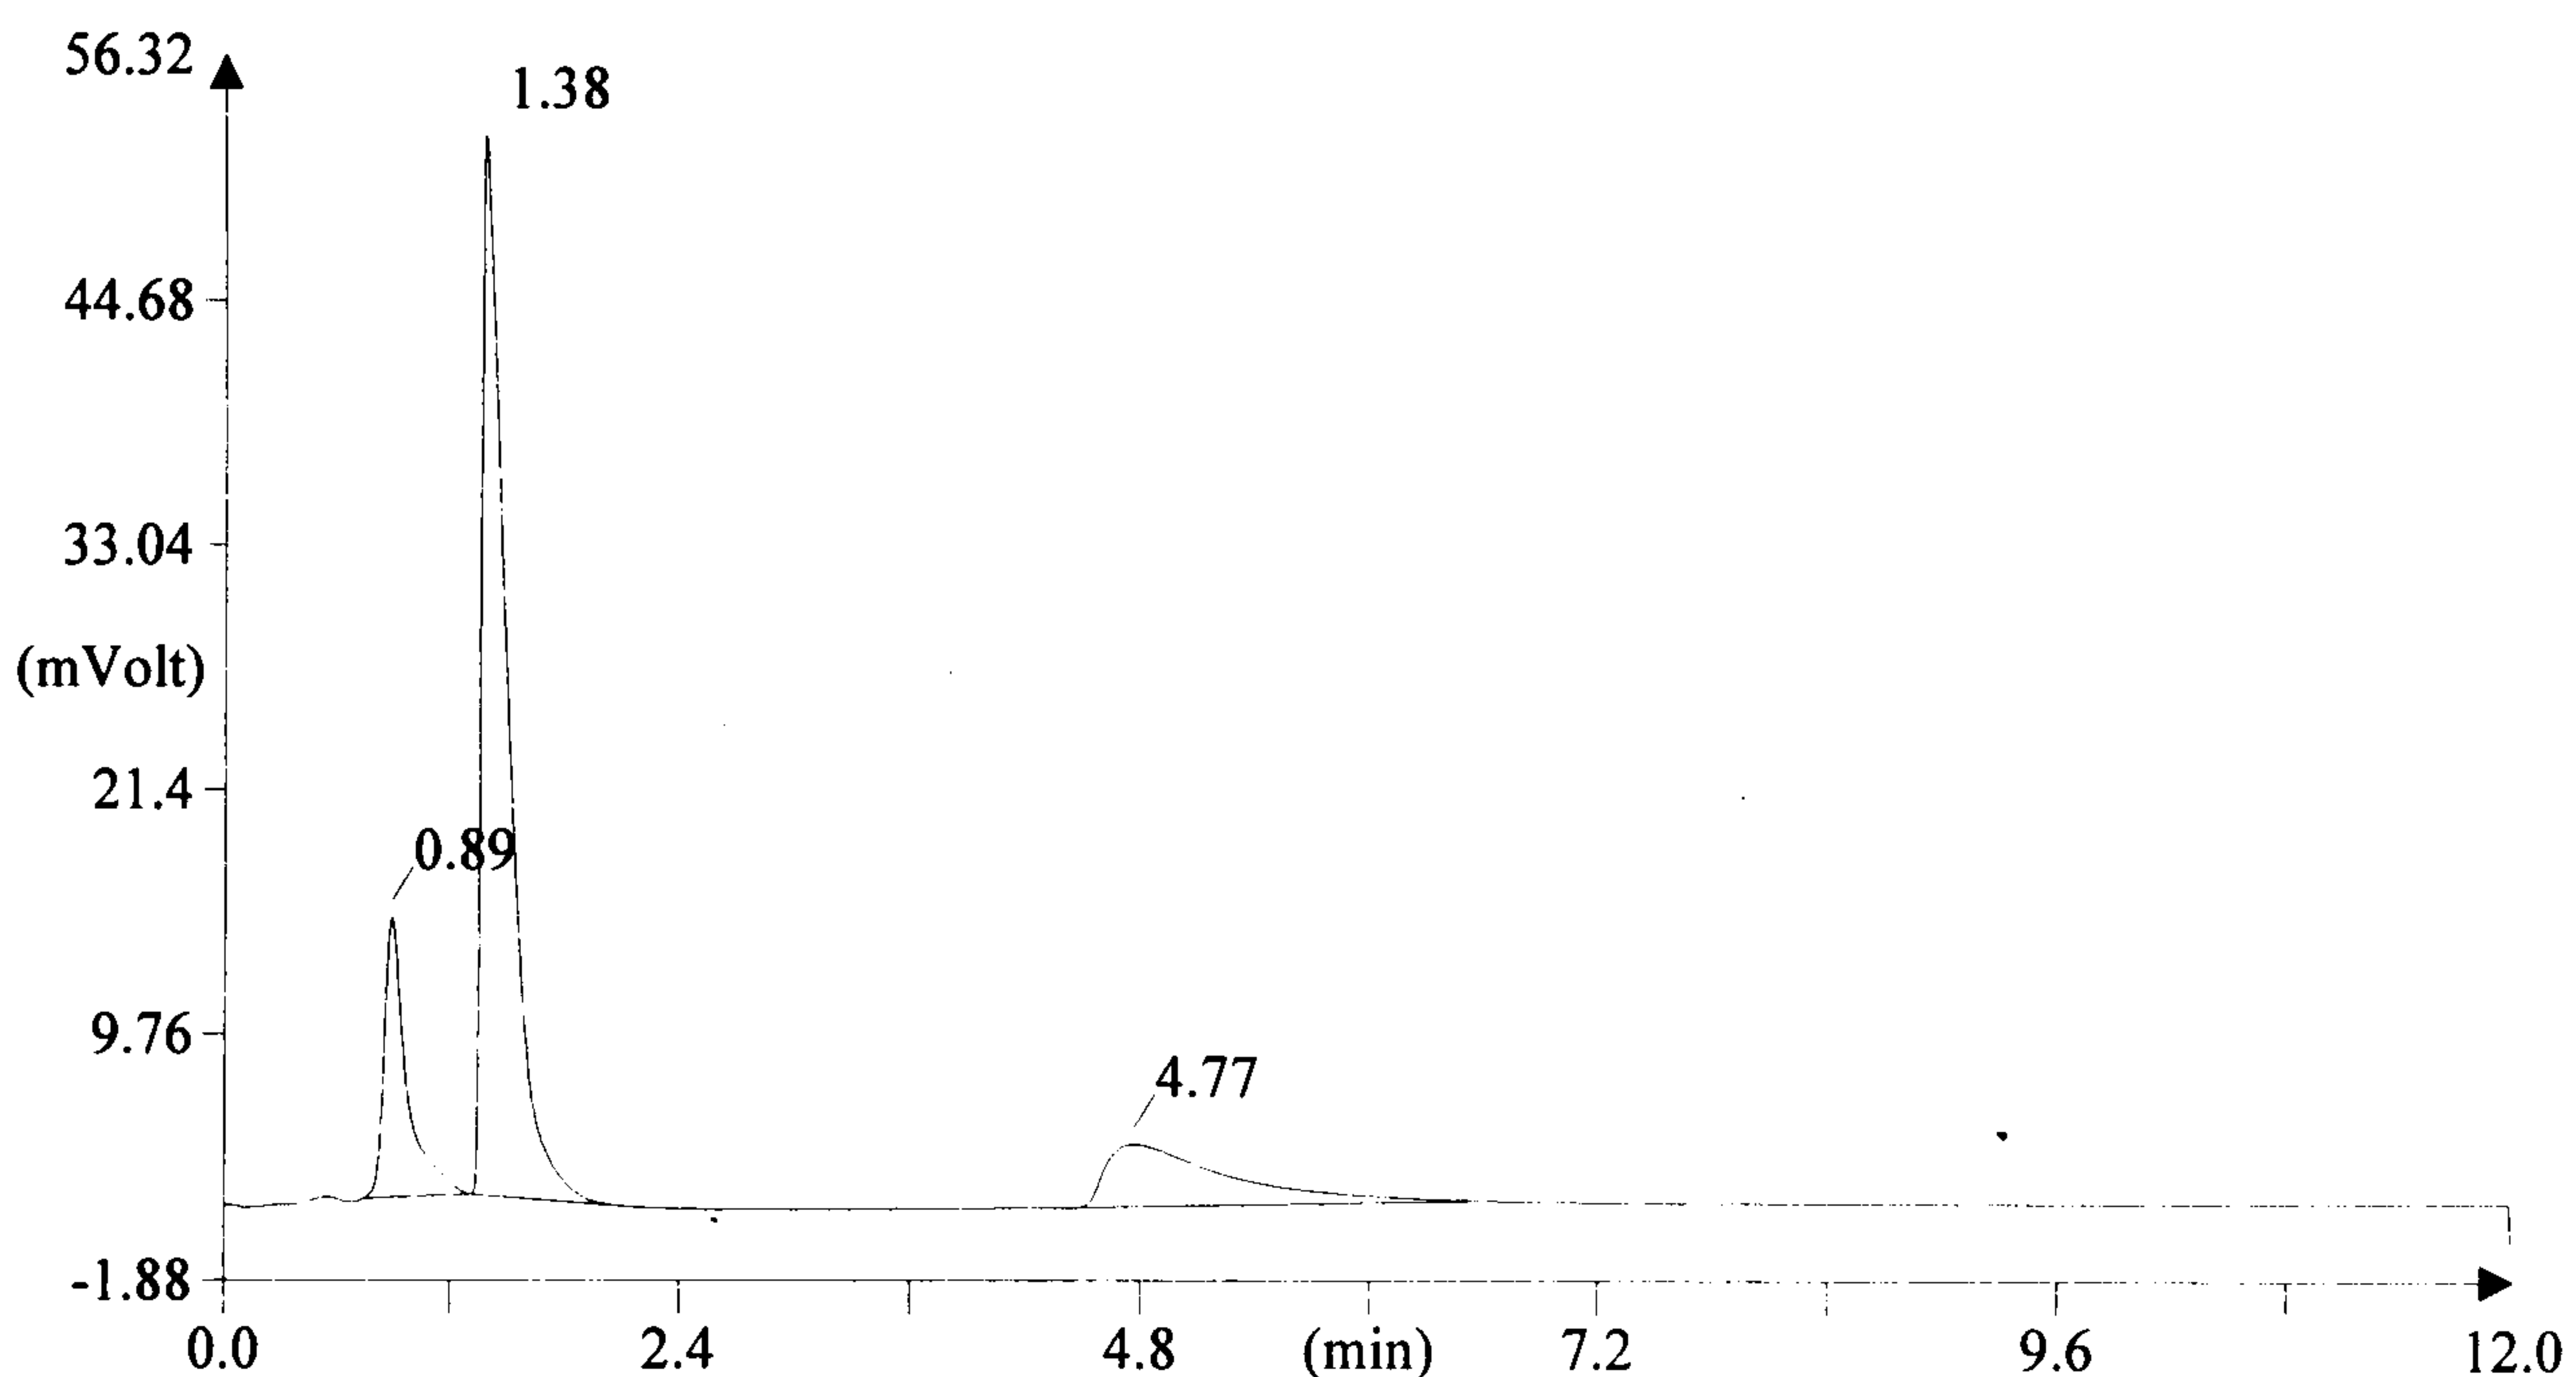

| Element Name | Element % | Ret. Time |
|--------------|-----------|-----------|
| Nitrogen     | 8.85      | 0.89      |
| Carbon       | 76.81     | 1.38      |
| Hydrogen     | 9.08      | 4.77      |

*Handwritten signature*

# FLASH EA 1112 SERIES CHN REPORT

## SCHOOL OF CHEMISTRY

## UNIVERSITY OF HYDERABAD

Method filename: E:\Program Files\Thermo Finnigan\Eager 300 for EA1112\DATA\Sys\_data\_ex  
Sample ID: MBC-12-39 (# 139)  
Analysis type: UnkNown  
Chromatogram filename: UNK-05052011-19.dat  
Sample weight: 1.136

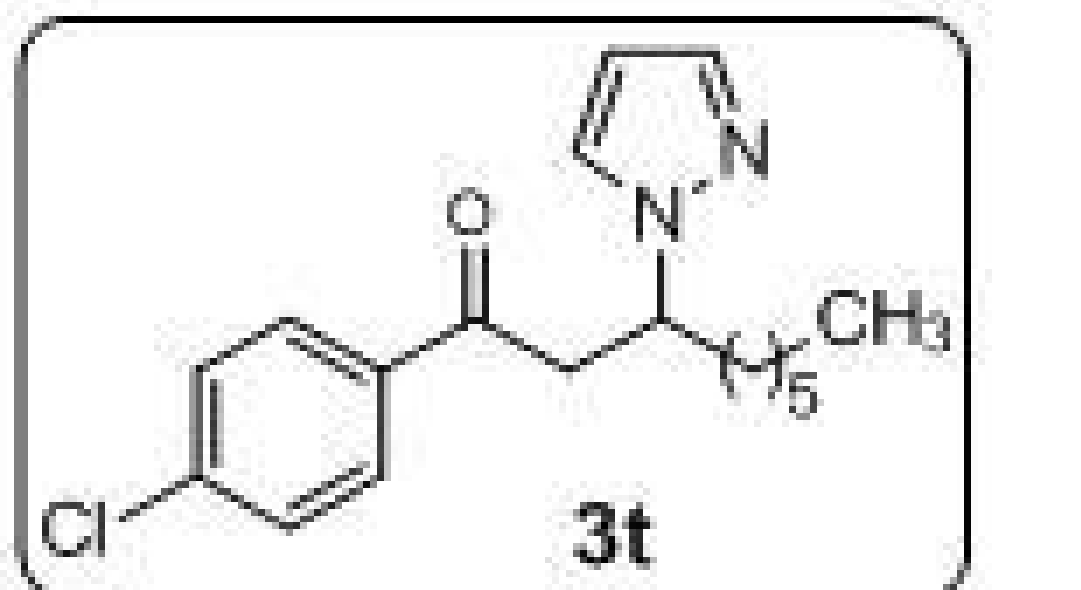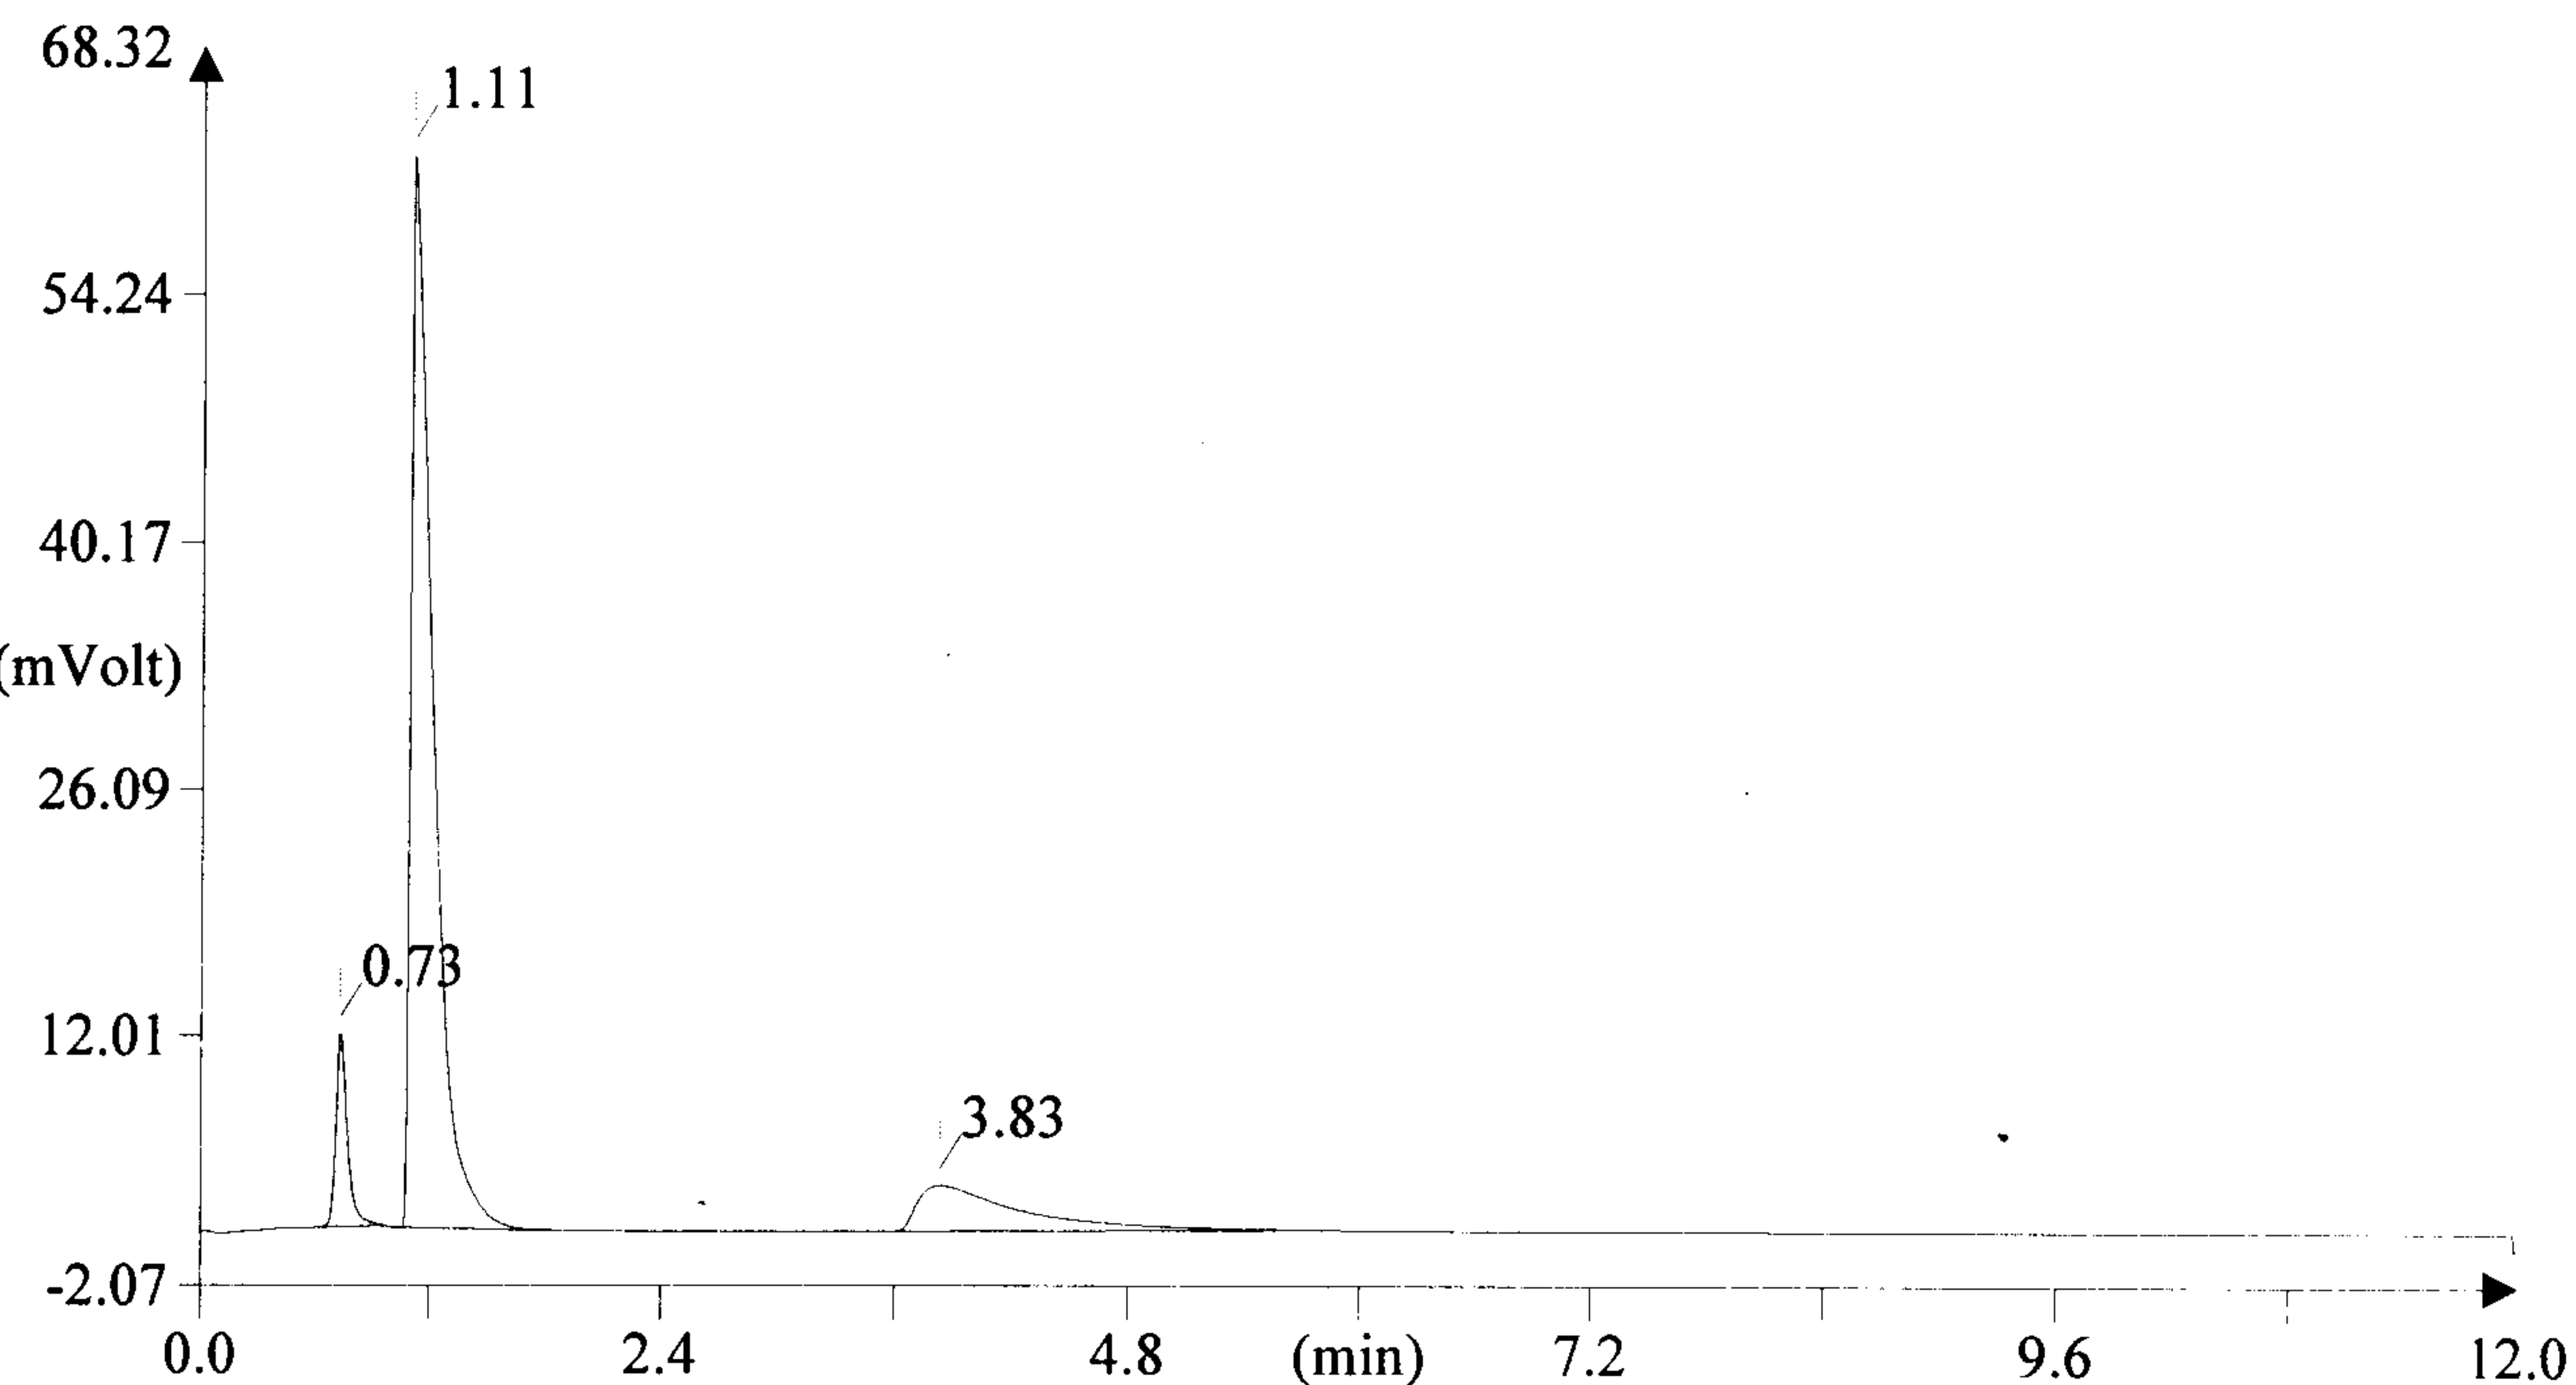

| Element Name | Element % | Ret. Time |
|--------------|-----------|-----------|
| Nitrogen     | 8. 68     | 0. 73     |
| Carbon       | 67. 71    | 1. 11     |
| Hydrogen     | 7. 21     | 3. 83     |

*OSK*

# FLASH EA 1112 SERIES CHN REPORT

## SCHOOL OF CHEMISTRY

## UNIVERSITY OF HYDERABAD

Method filename: E:\Program Files\Thermo Finnigan\Eager 300 for EA1112\DATA\Sys\_data\_ex  
 Sample ID: MBC-12-5 (# 177)  
 Analysis type: UnkNown  
 Chromatogram filename: UNK-22082011-7.dat  
 Sample weight: 1.009

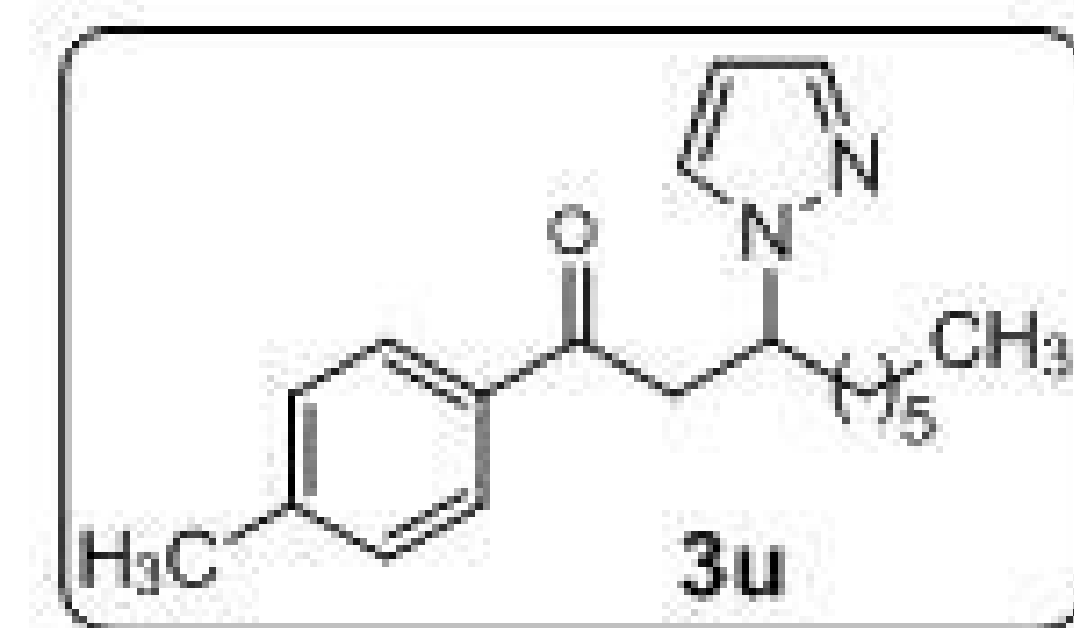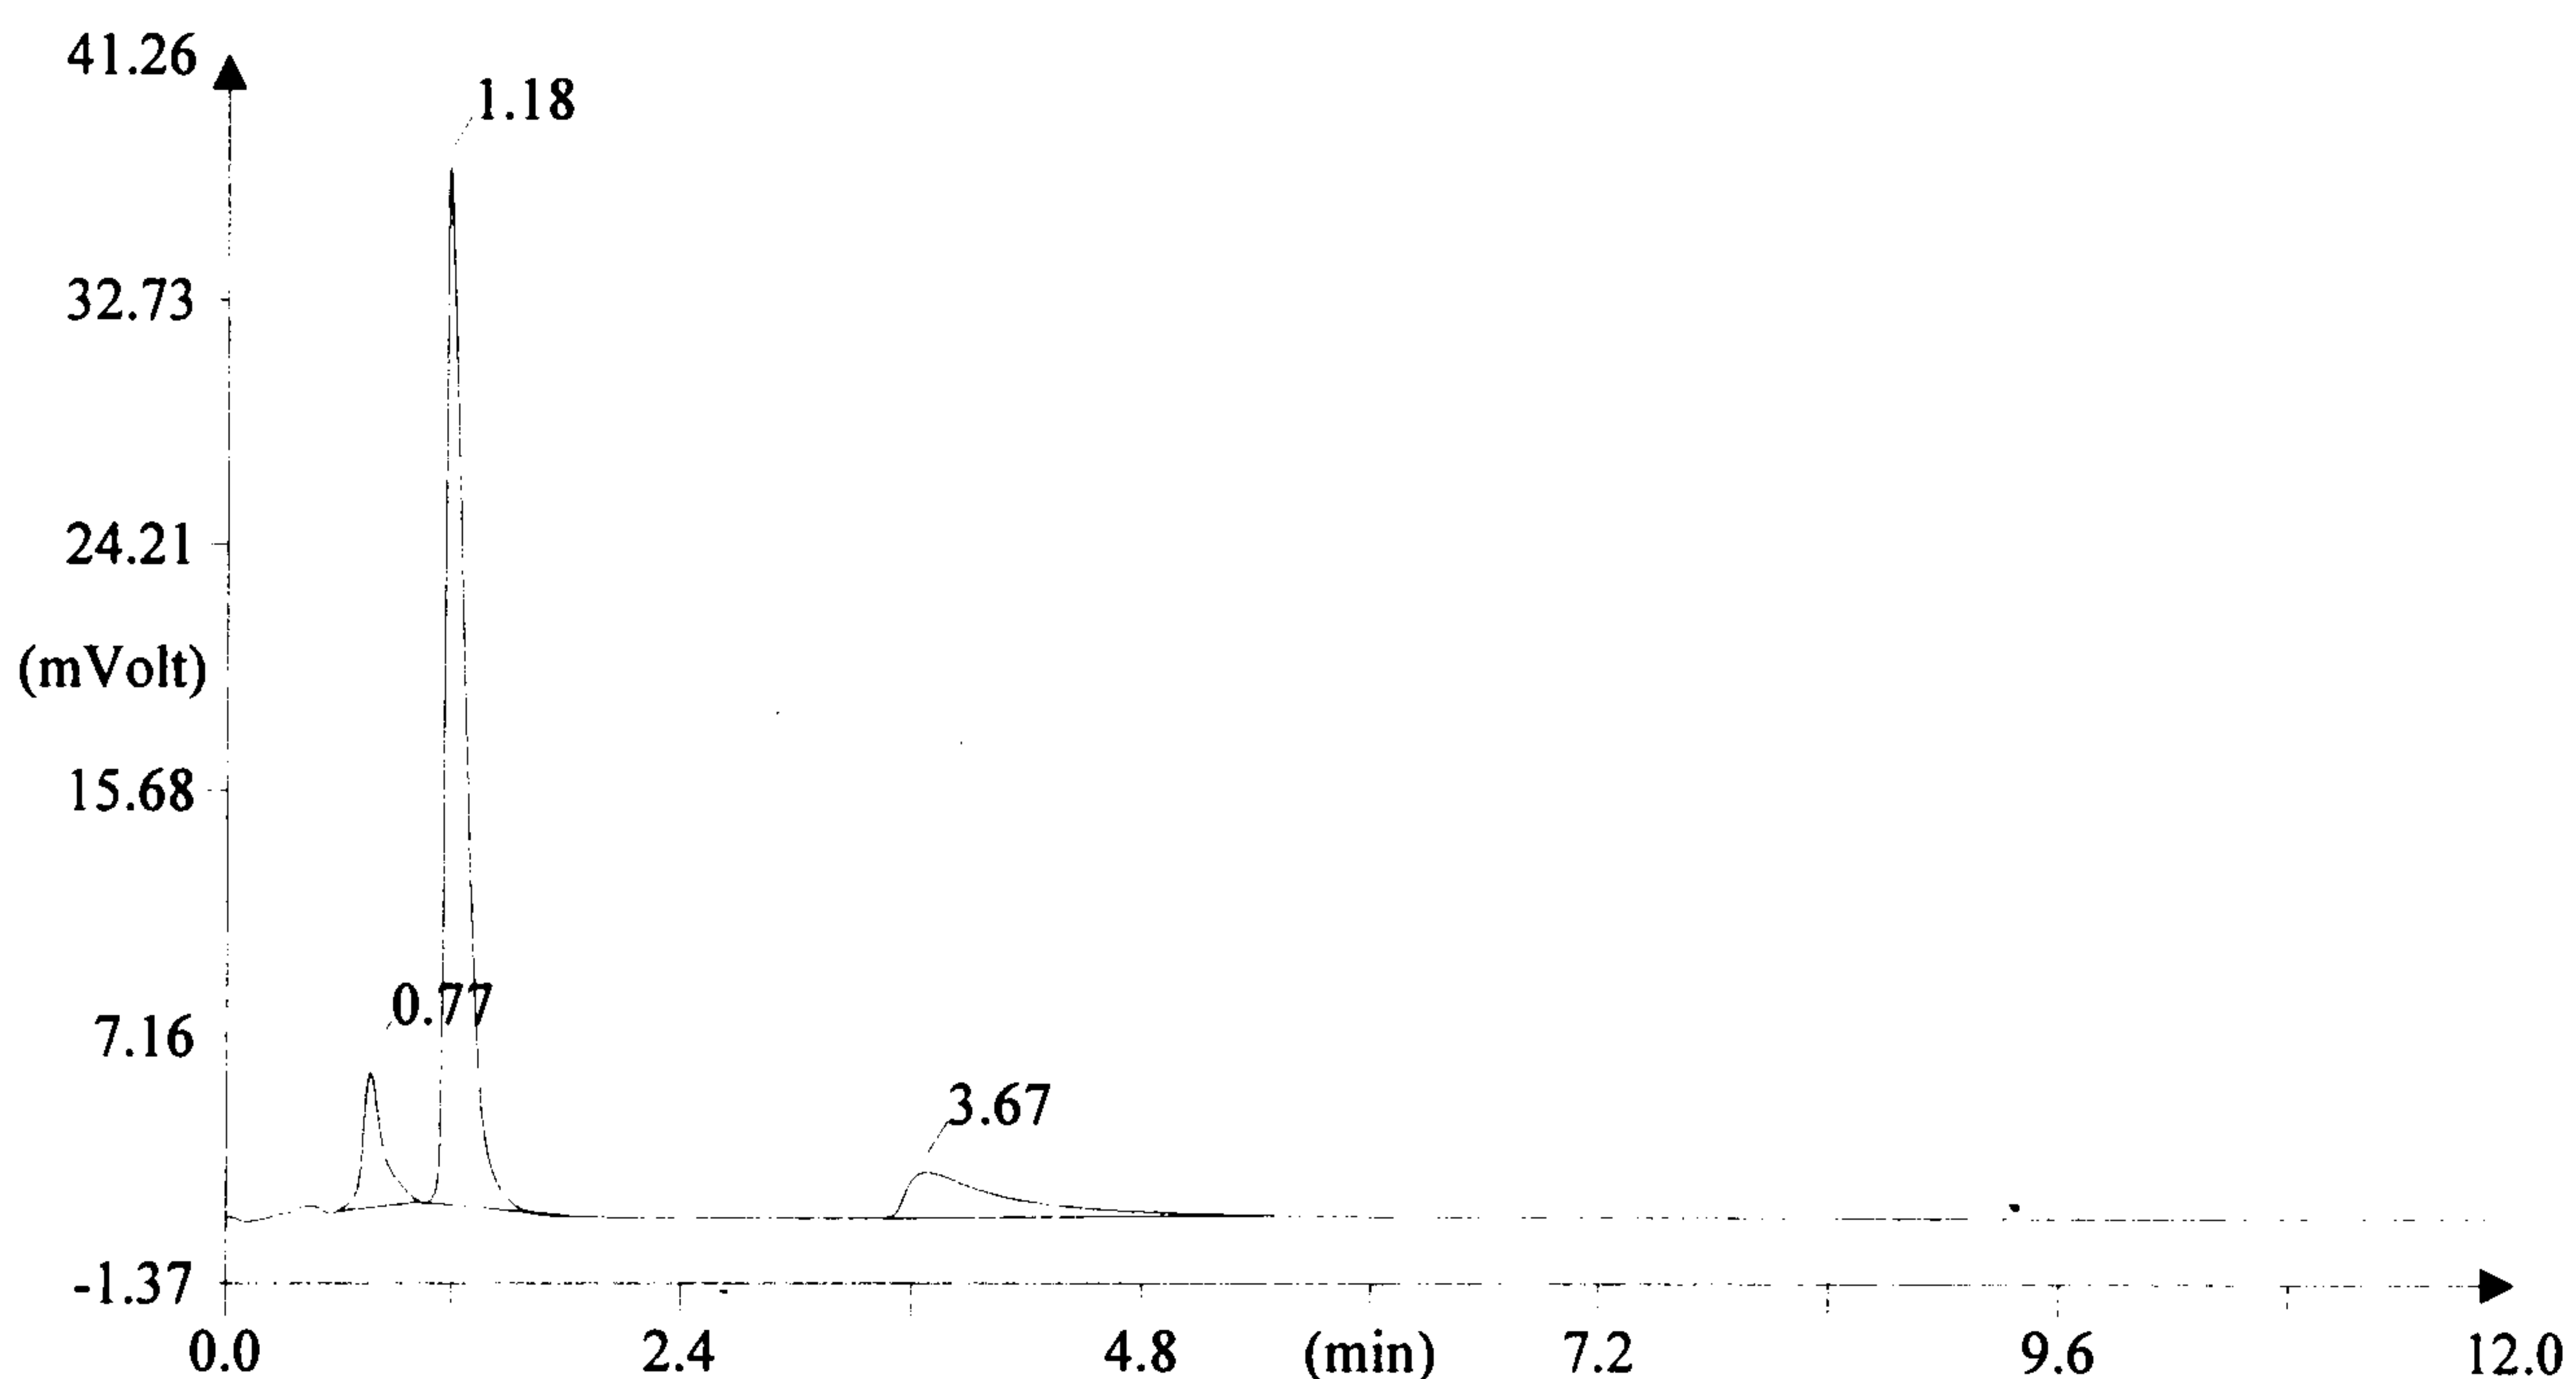

| Element Name | Element % | Ret. Time |
|--------------|-----------|-----------|
| Nitrogen     | 9.21      | 0.77      |
| Carbon       | 76.58     | 1.18      |
| Hydrogen     | 8.68      | 3.67      |

*(Signature)*



# FLASH EA 1112 SERIES CHN REPORT

## SCHOOL OF CHEMISTRY

## UNIVERSITY OF HYDERABAD

Method filename: E:\Program Files\Thermo Finnigan\Eager 300 for EA1112\DATA\Sys\_data\_ex  
Sample ID: MBC-12-7-T2 (# 179)  
Analysis type: UnkNow  
Chromatogram filename: UNK-22082011-9.dat  
Sample weight: 1.113

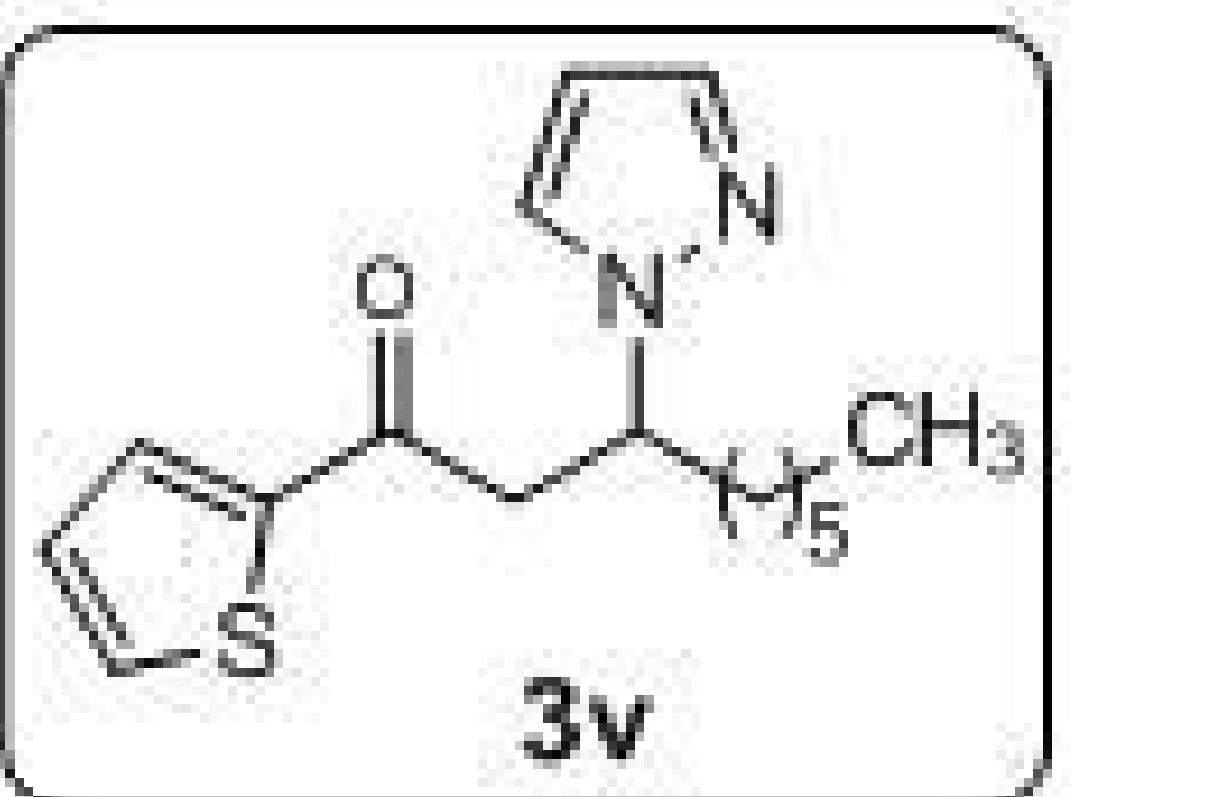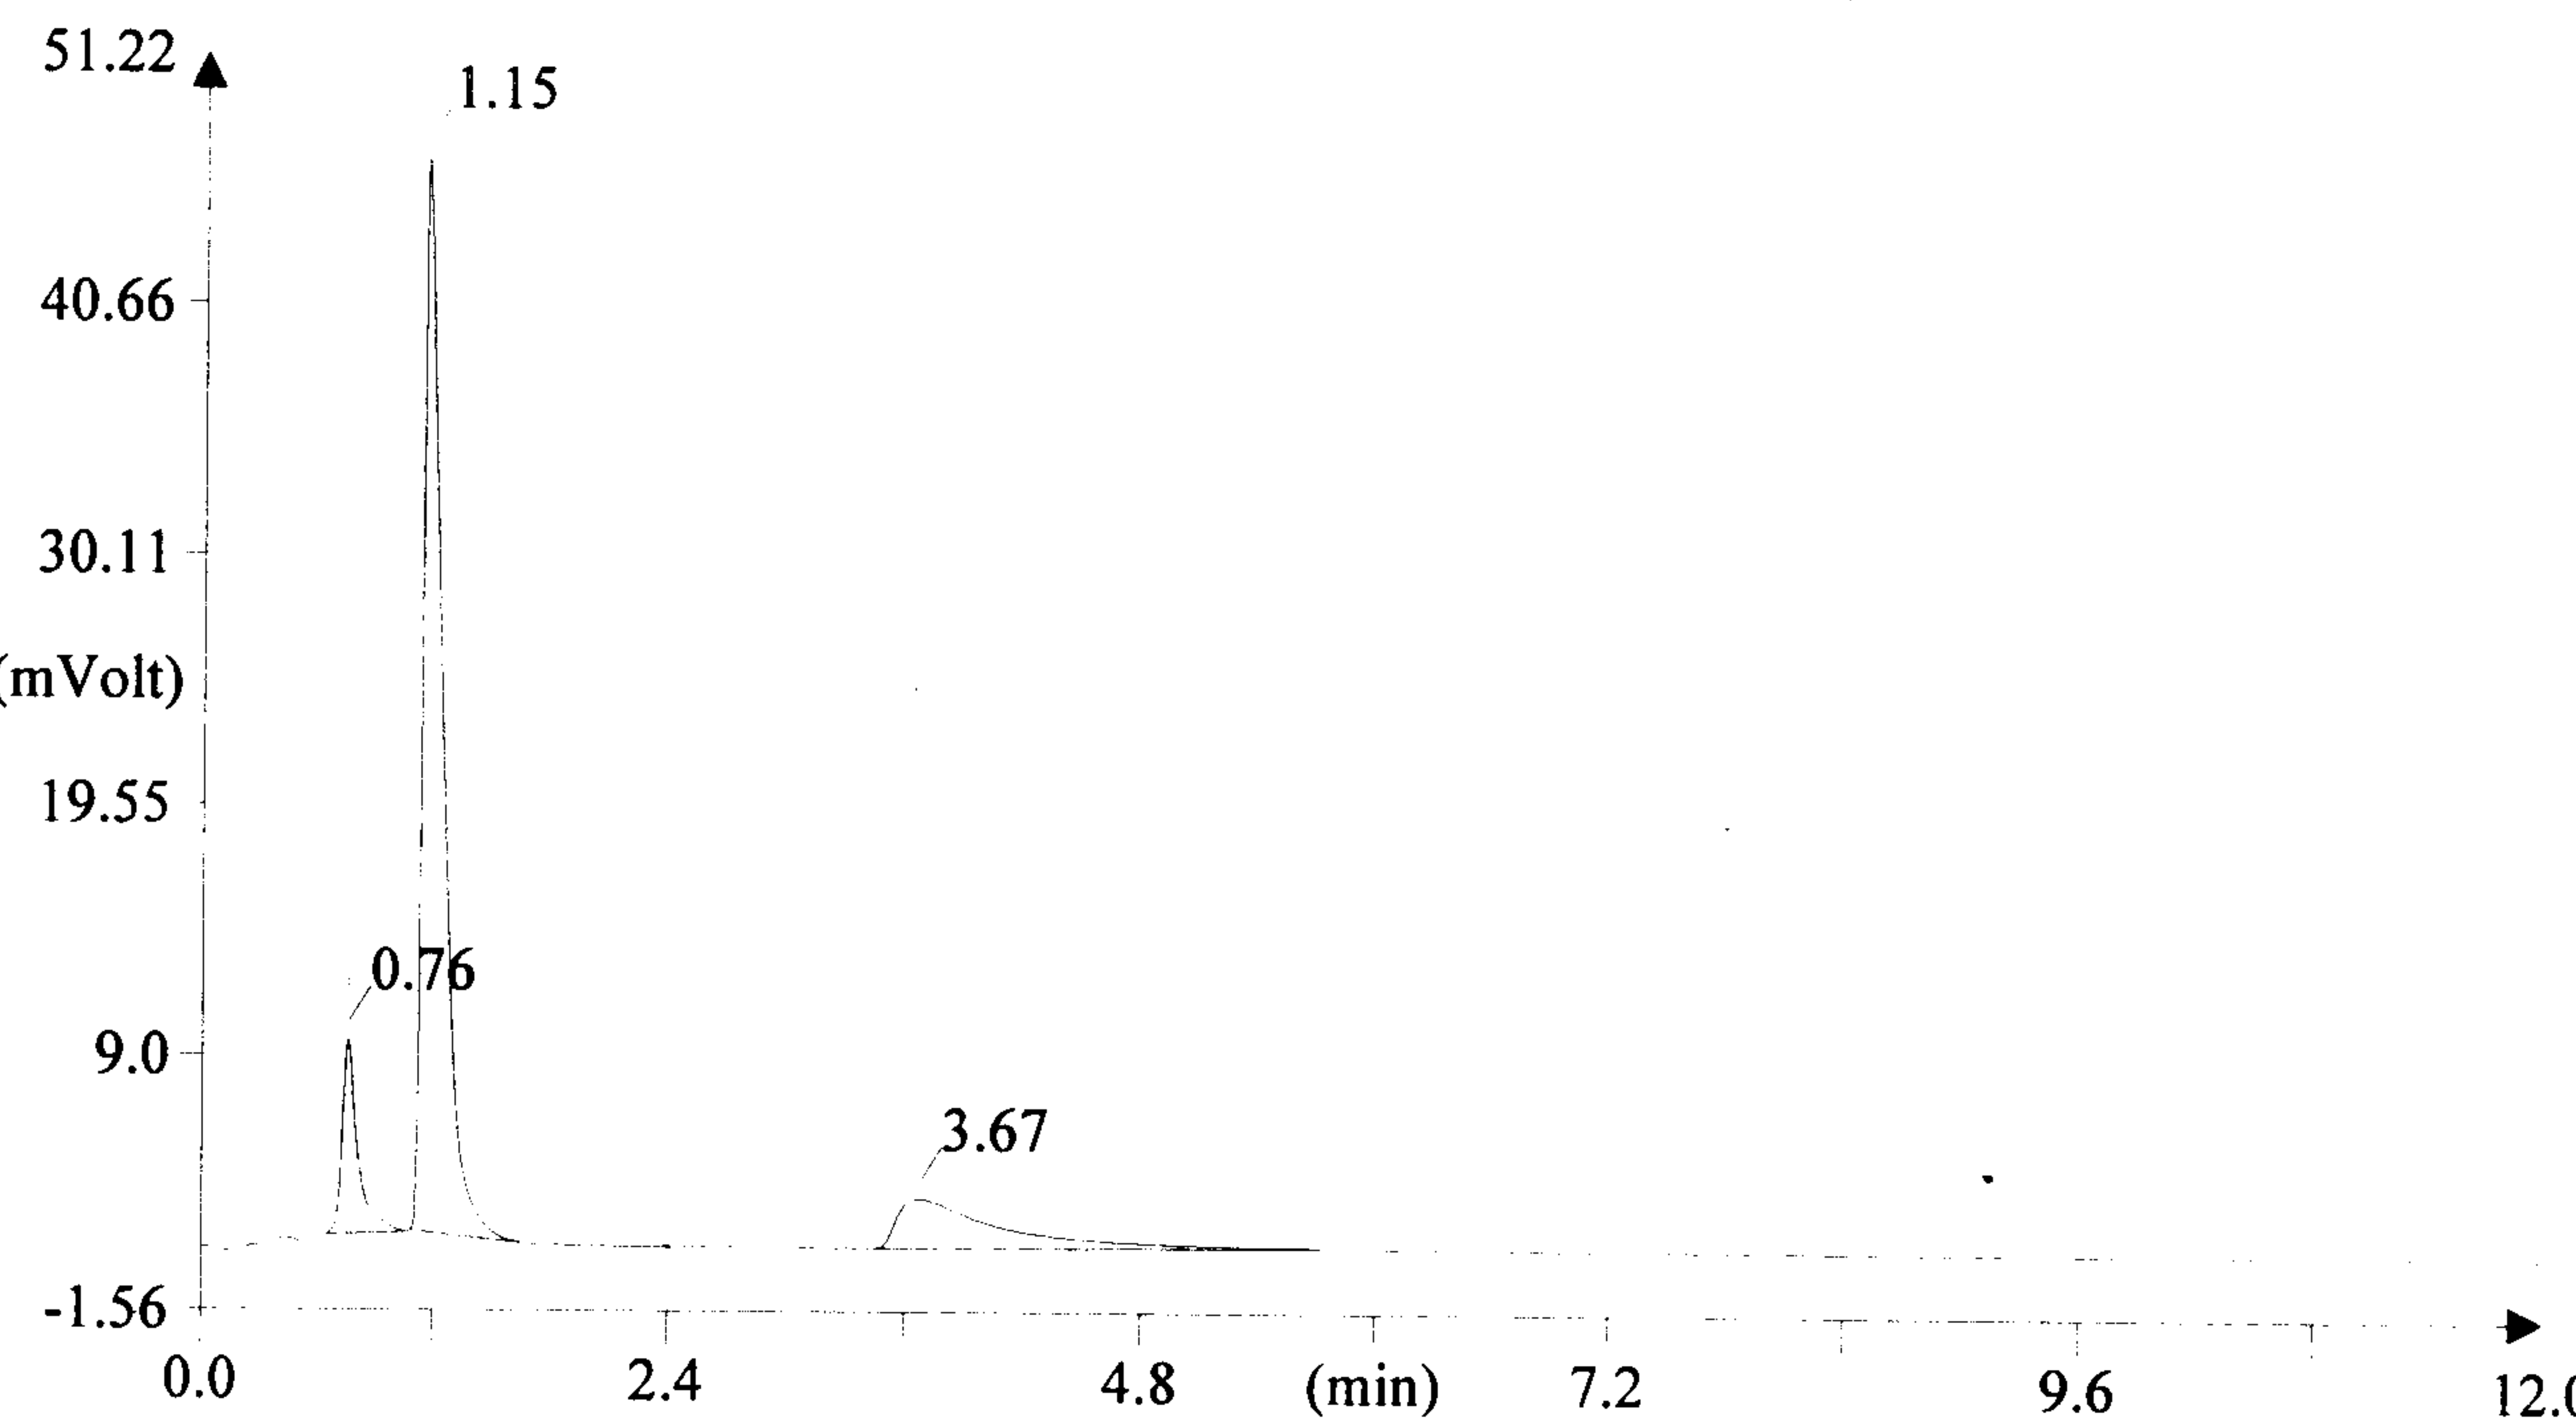

| Element Name | Element % | Ret. Time |
|--------------|-----------|-----------|
| Nitrogen     | 9. 59     | 0. 76     |
| Carbon       | 66. 32    | 1. 15     |
| Hydrogen     | 7. 61     | 3. 67     |

*Signature*



# FLASH EA 1112 SERIES CHN REPORT

## SCHOOL OF CHEMISTRY

## UNIVERSITY OF HYDERABAD

Method filename: I:\Program Files\Thermo Finnigan\Eager 300 for EA1112\DATA\Sys\_data\_exa  
Sample ID: MBC-11-130-T2 (# 10)  
Analysis type: UnkNown  
Chromatogram filename: UNK-06042011-10.dat  
Sample weight: .997

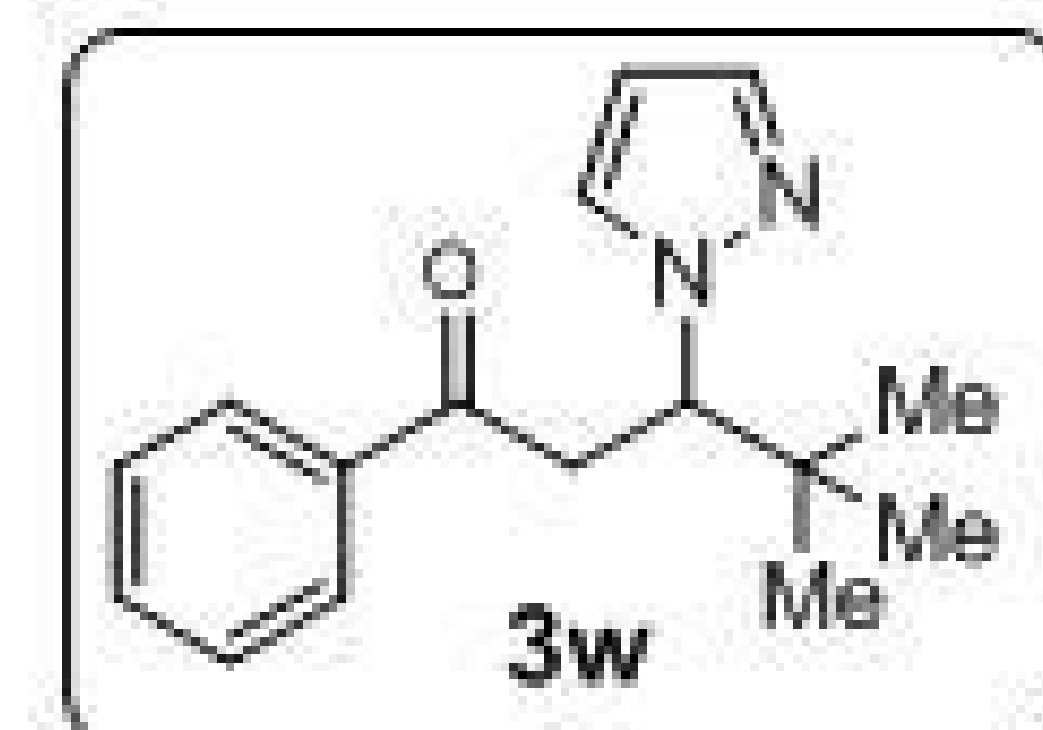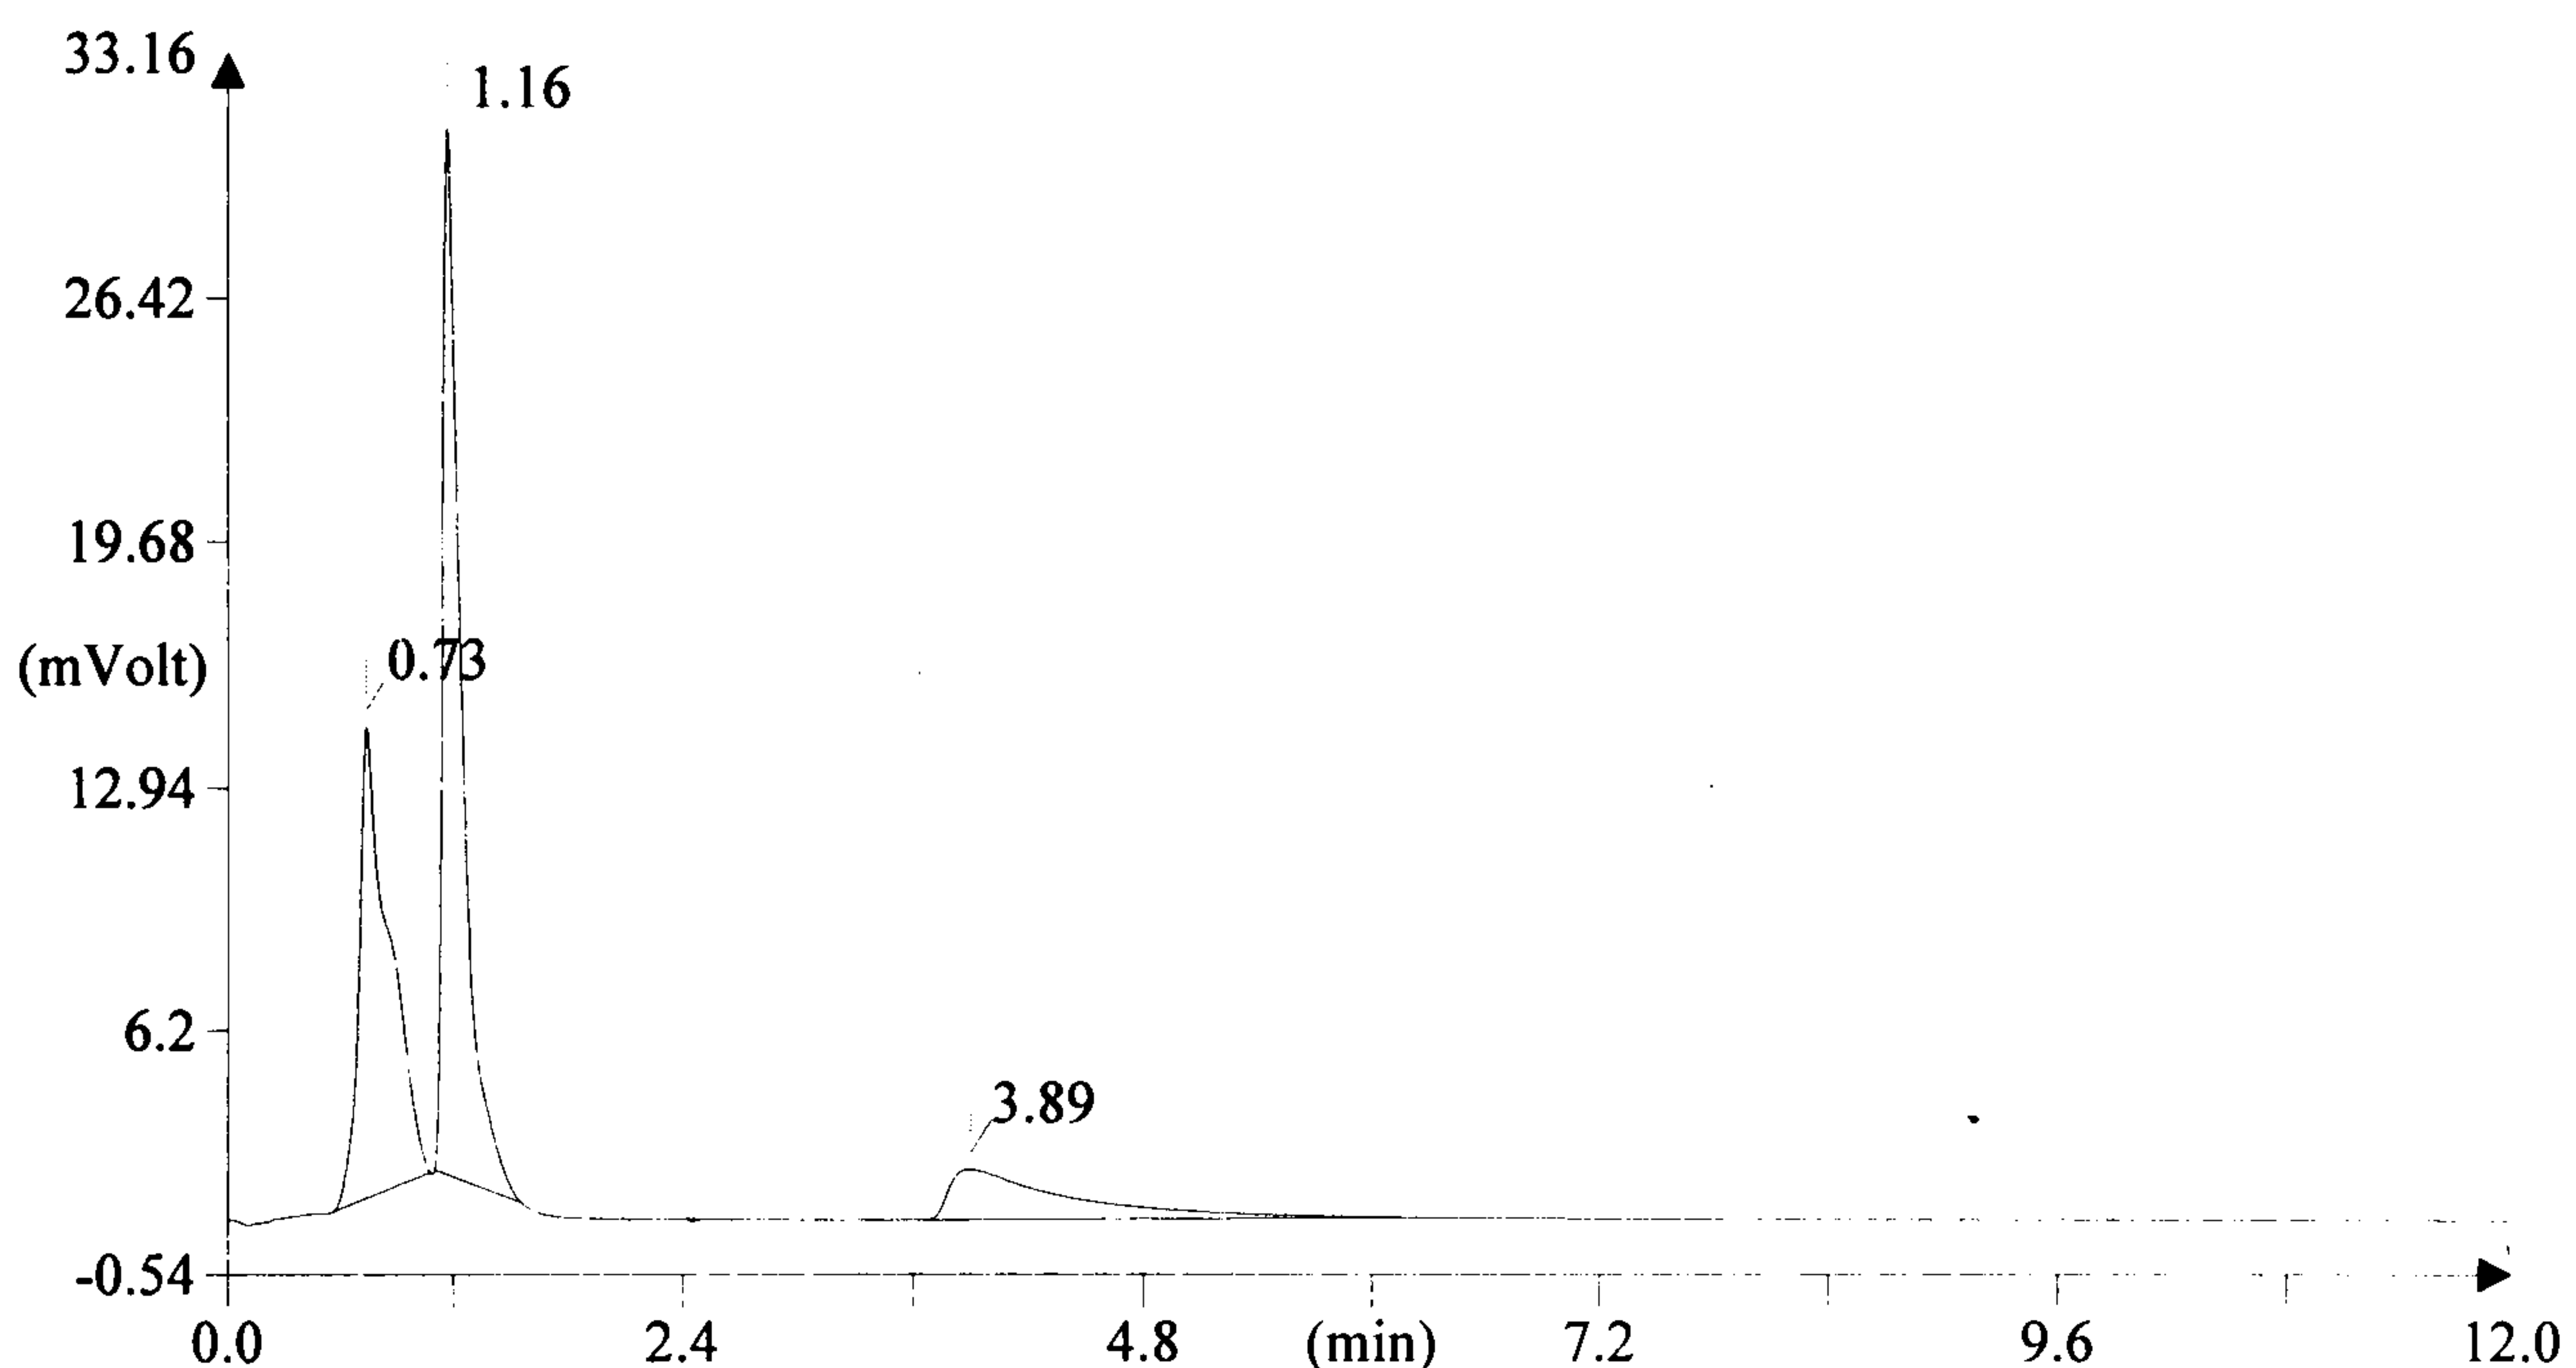

| Element Name | Element % | Ret. Time |
|--------------|-----------|-----------|
| Nitrogen     | 11.07     | 0.73      |
| Carbon       | 74.85     | 1.16      |
| Hydrogen     | 7.95      | 3.89      |

03/12

# FLASH EA 1112 SERIES CHN REPORT

## SCHOOL OF CHEMISTRY

## UNIVERSITY OF HYDERABAD

Method filename: E:\Program Files\Thermo Finnigan\Eager 300 for EA1112\DATA\Sys\_data\_ex  
 Sample ID: MBC-12-38 (# 140)  
 Analysis type: UnkNown  
 Chromatogram filename: UNK-05052011-20.dat  
 Sample weight: 1.108

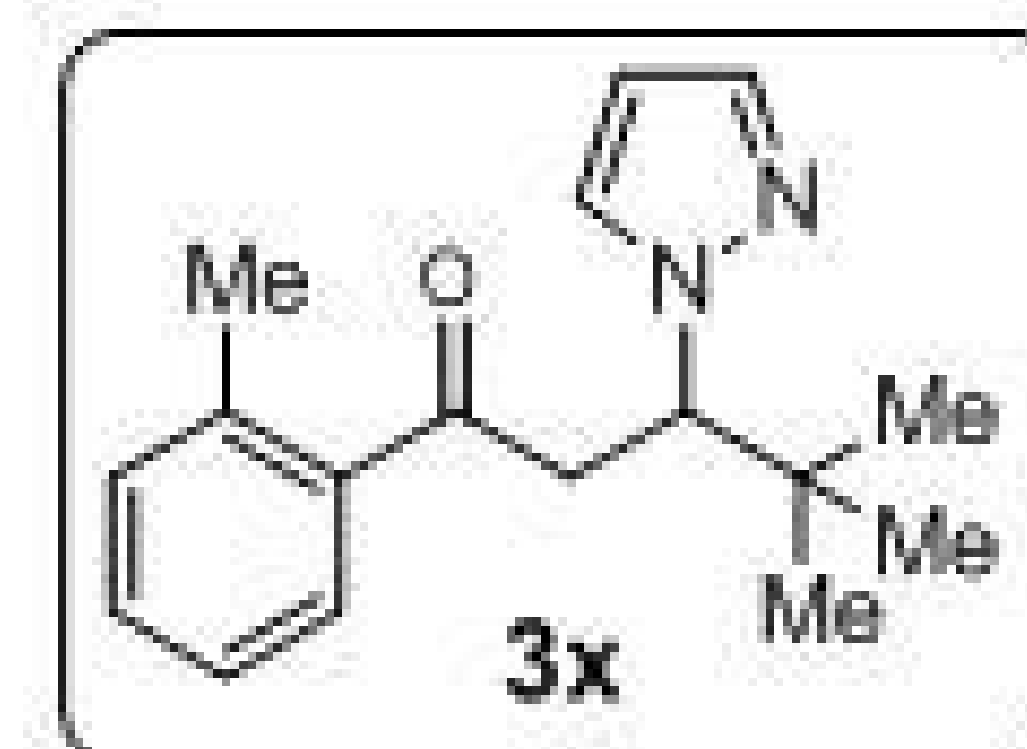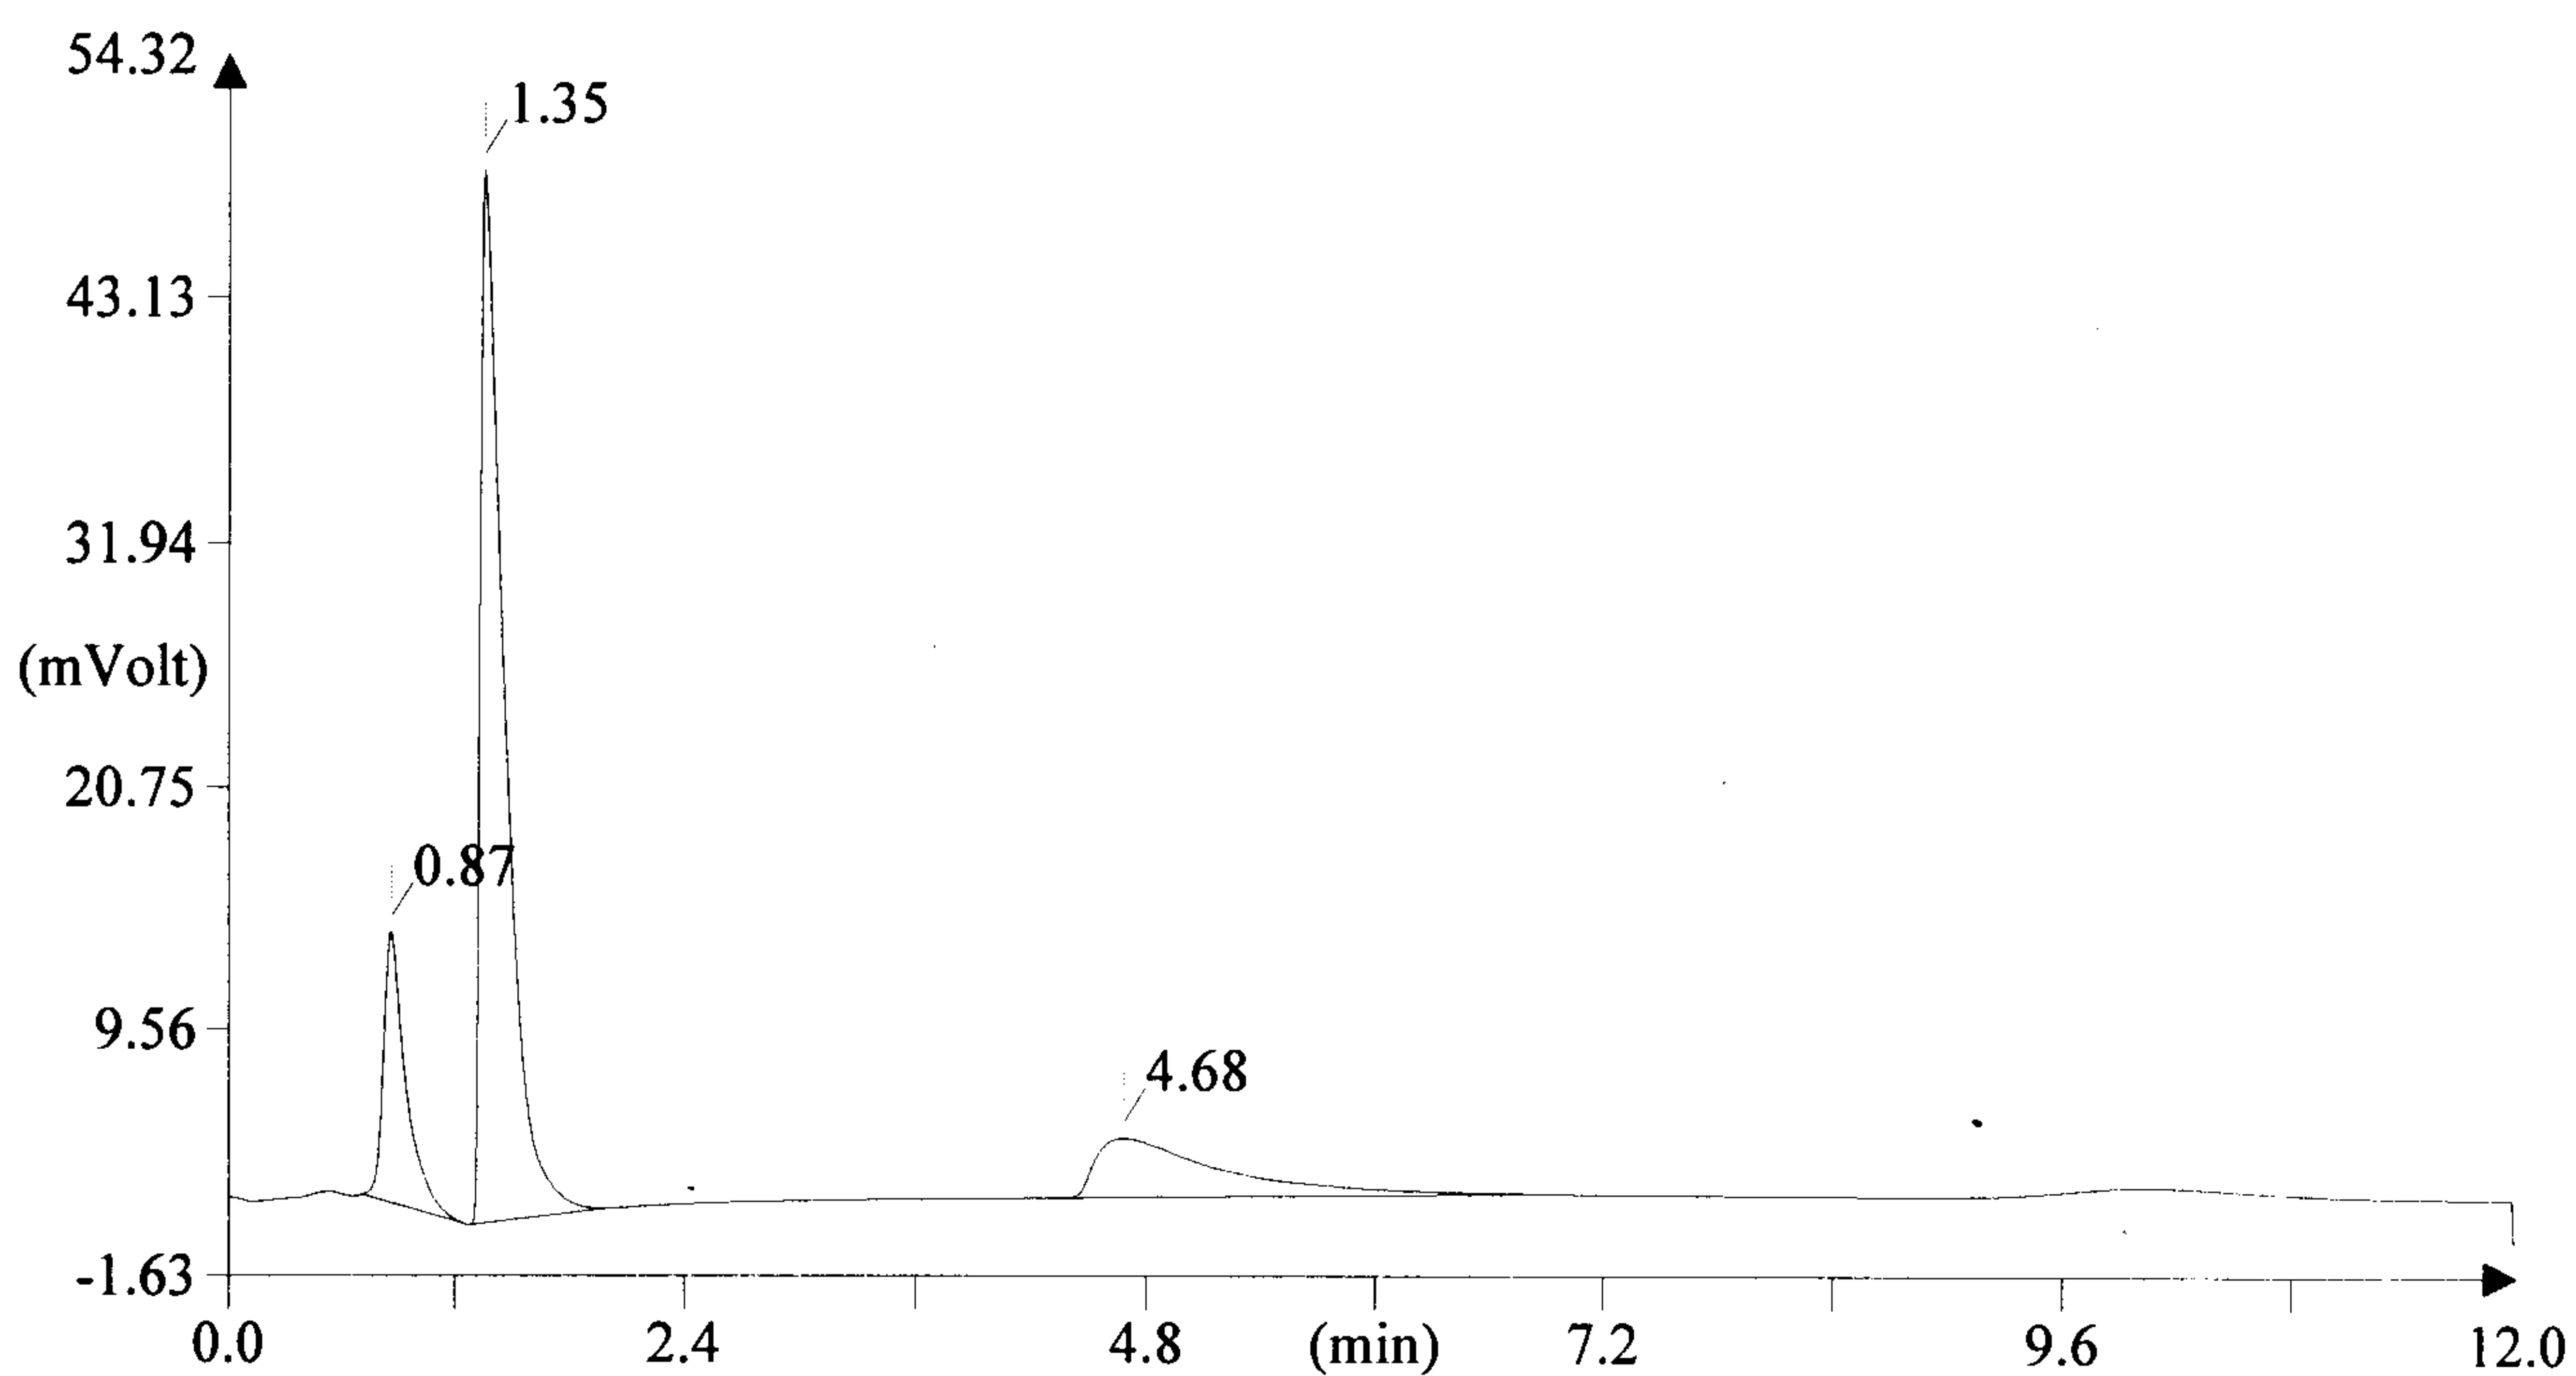

| Element Name | Element % | Ret. Time |
|--------------|-----------|-----------|
| Nitrogen     | 10. 45    | 0. 87     |
| Carbon       | 75. 39    | 1. 35     |
| Hydrogen     | 8. 26     | 4. 68     |

*Handwritten signature/initials*

# FLASH EA 1112 SERIES CHN REPORT

## SCHOOL OF CHEMISTRY

## UNIVERSITY OF HYDERABAD

Method filename: E:\Program Files\Thermo Finnigan\Eager 300 for EA1112\DATA\Sys\_data\_ex  
 Sample ID: MBC-11-66-T2 (# 120)  
 Analysis type: UnkNown  
 Chromatogram filename: UNK-12072011-10.dat  
 Sample weight: 1.131

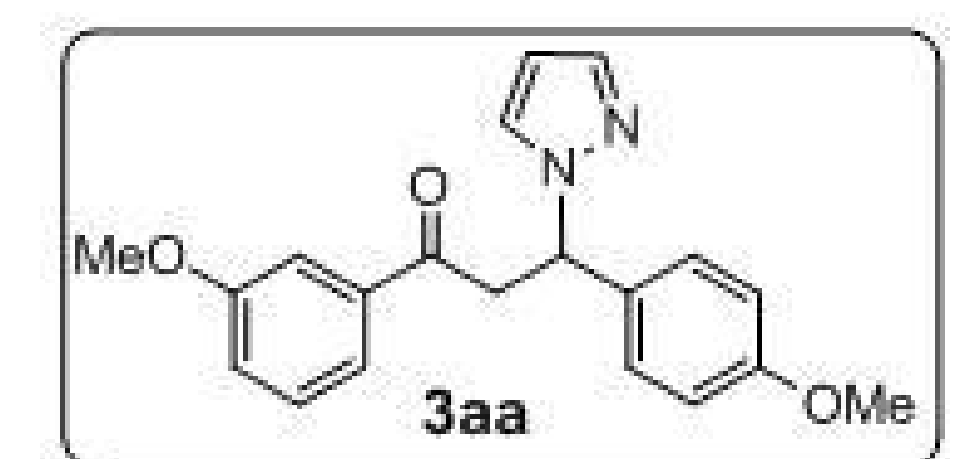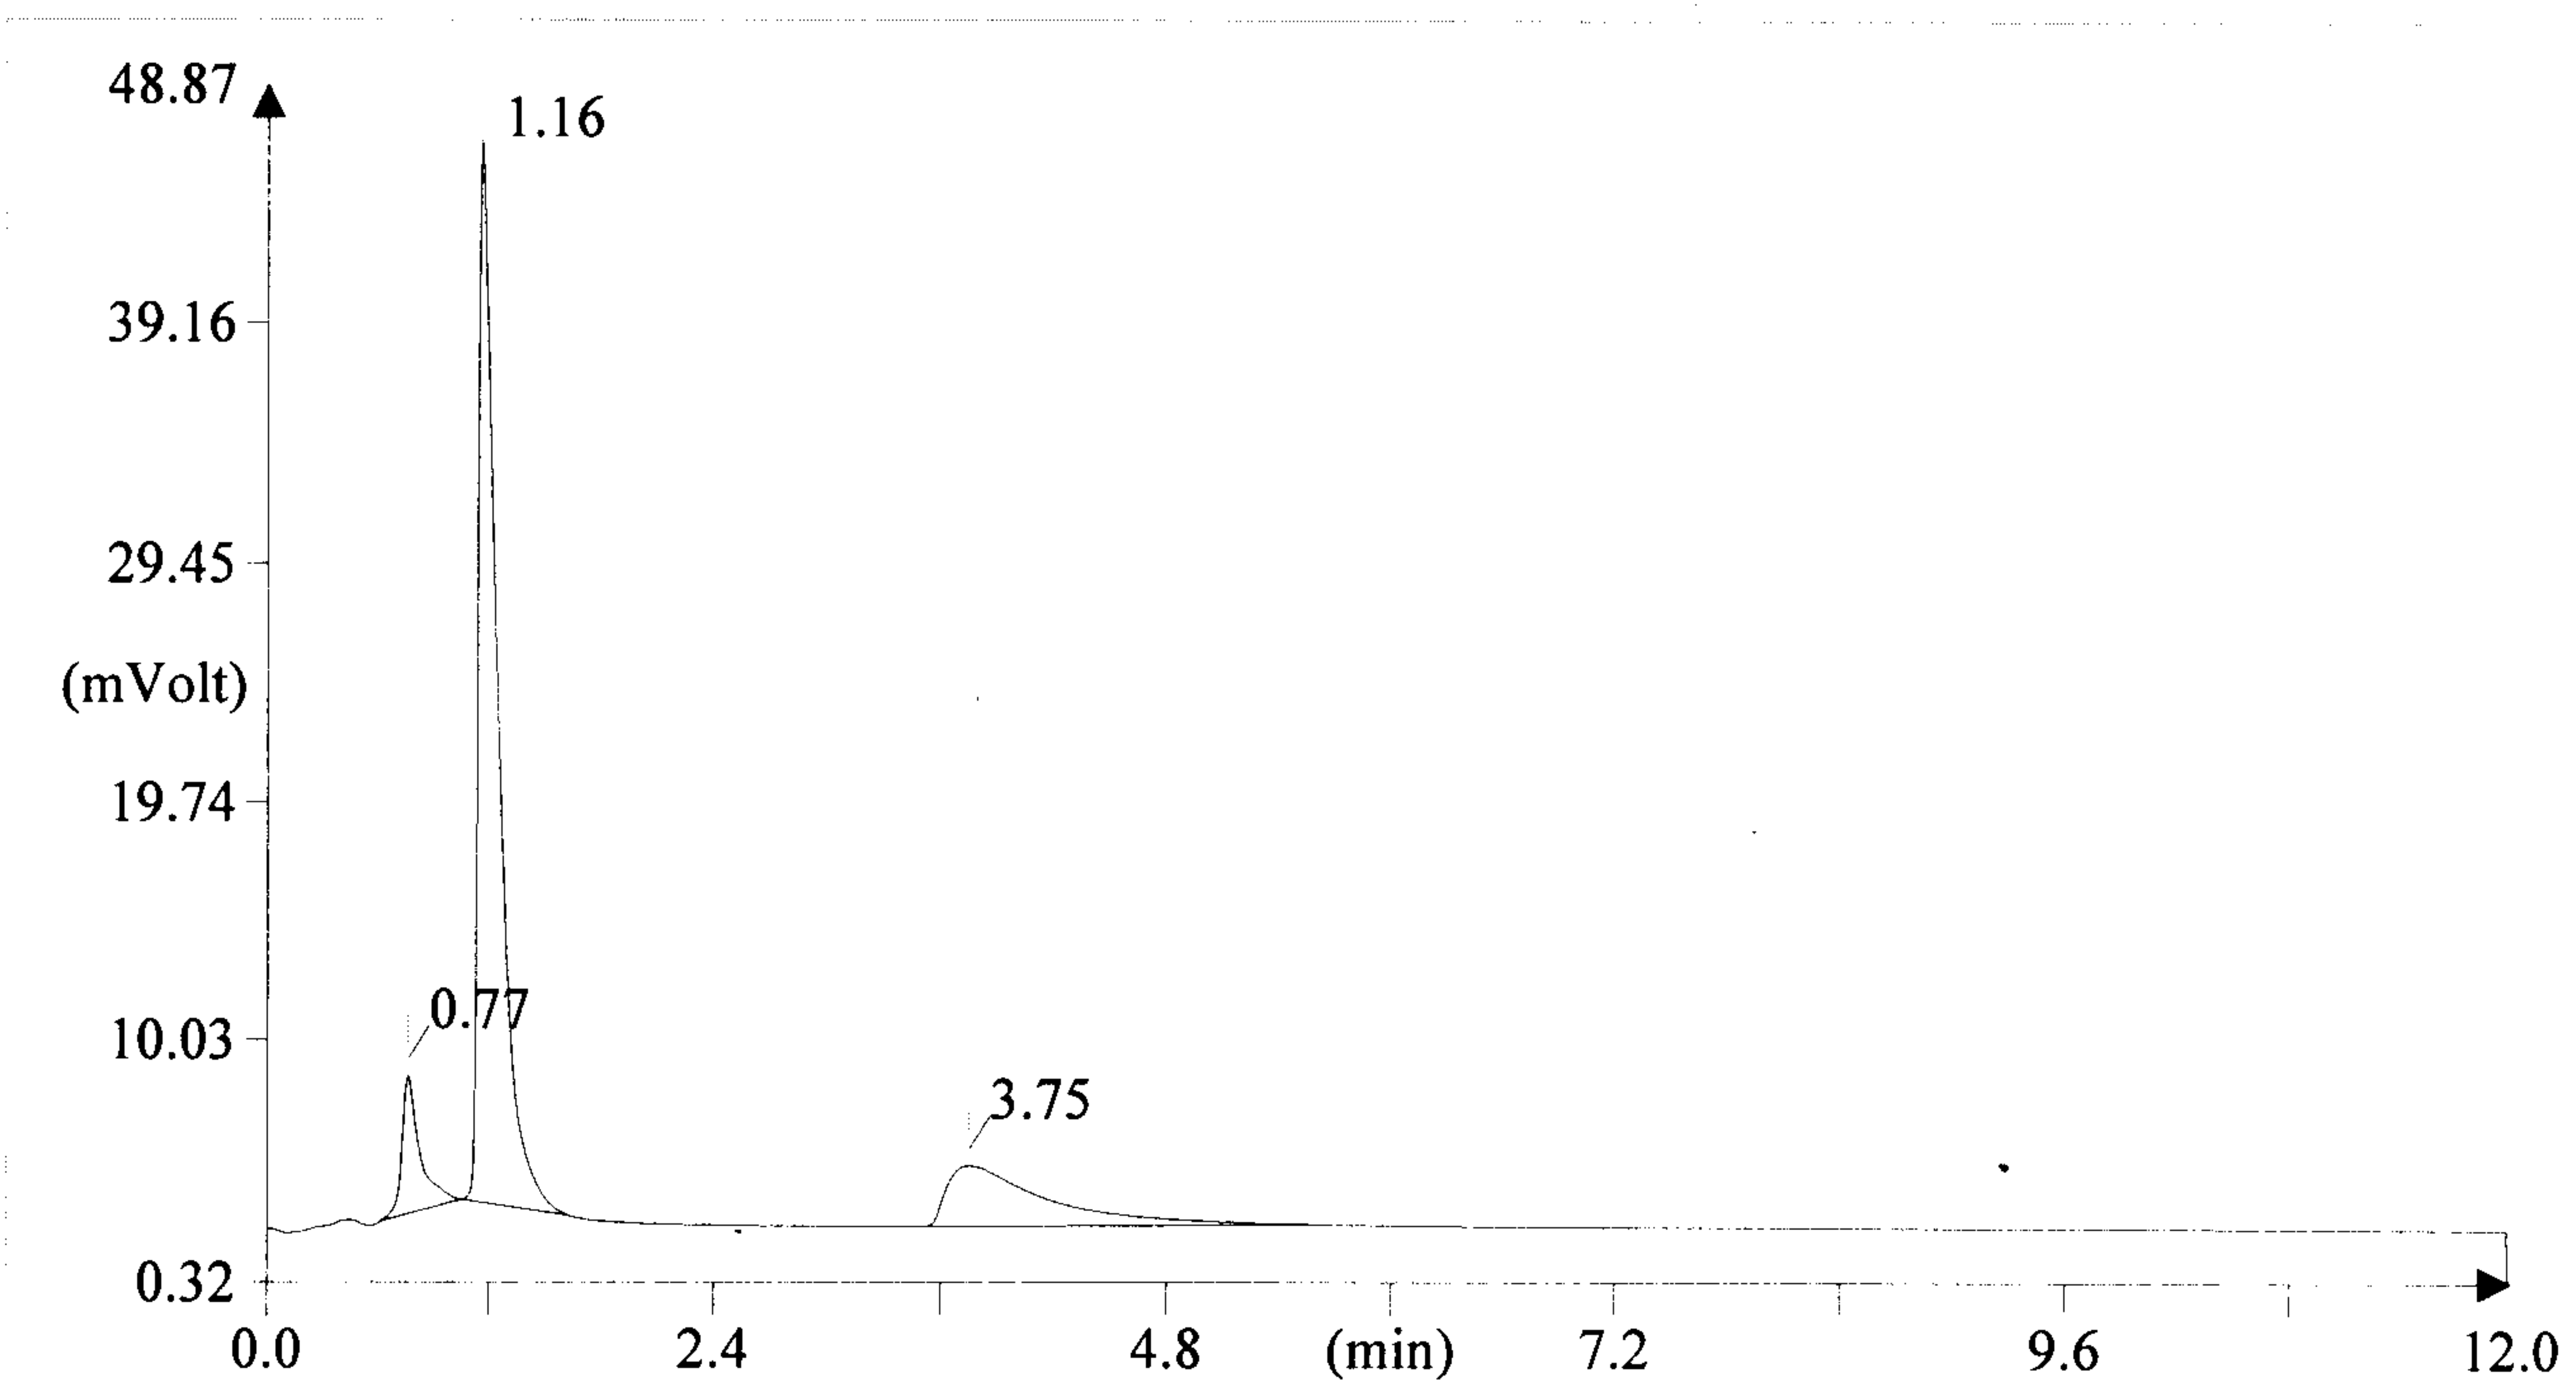

| Element Name | Element % | Ret. Time |
|--------------|-----------|-----------|
| Nitrogen     | 8. 21     | 0. 77     |
| Carbon       | 71. 56    | 1. 16     |
| Hydrogen     | 6. 12     | 3. 75     |

*BSL*



# FLASH EA 1112 SERIES CHN REPORT

## SCHOOL OF CHEMISTRY

## UNIVERSITY OF HYDERABAD

Method filename: E:\Program Files\Thermo Finnigan\Eager 300 for EA1112\DATA\Sys\_data\_ex  
Sample ID: MBC-11-67-T2 (# 122)  
Analysis type: UnkNown  
Chromatogram filename: UNK-12072011-12.dat  
Sample weight: 1.185

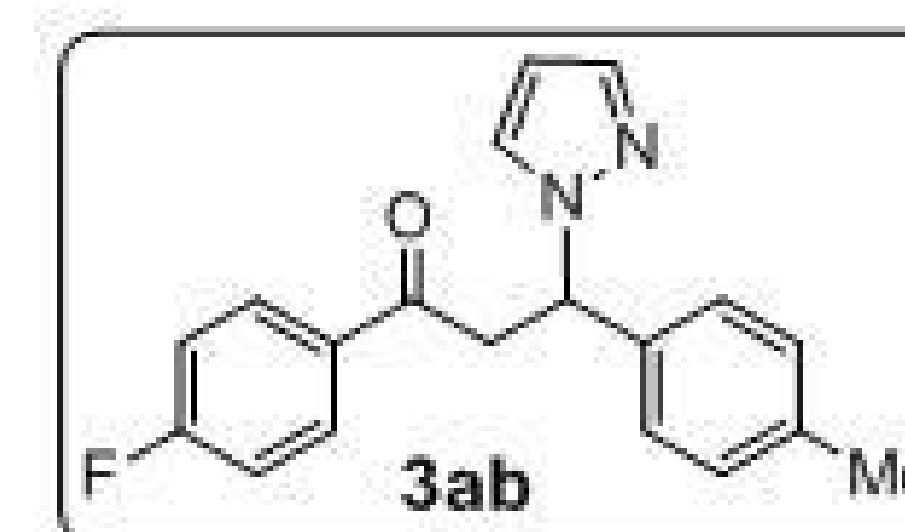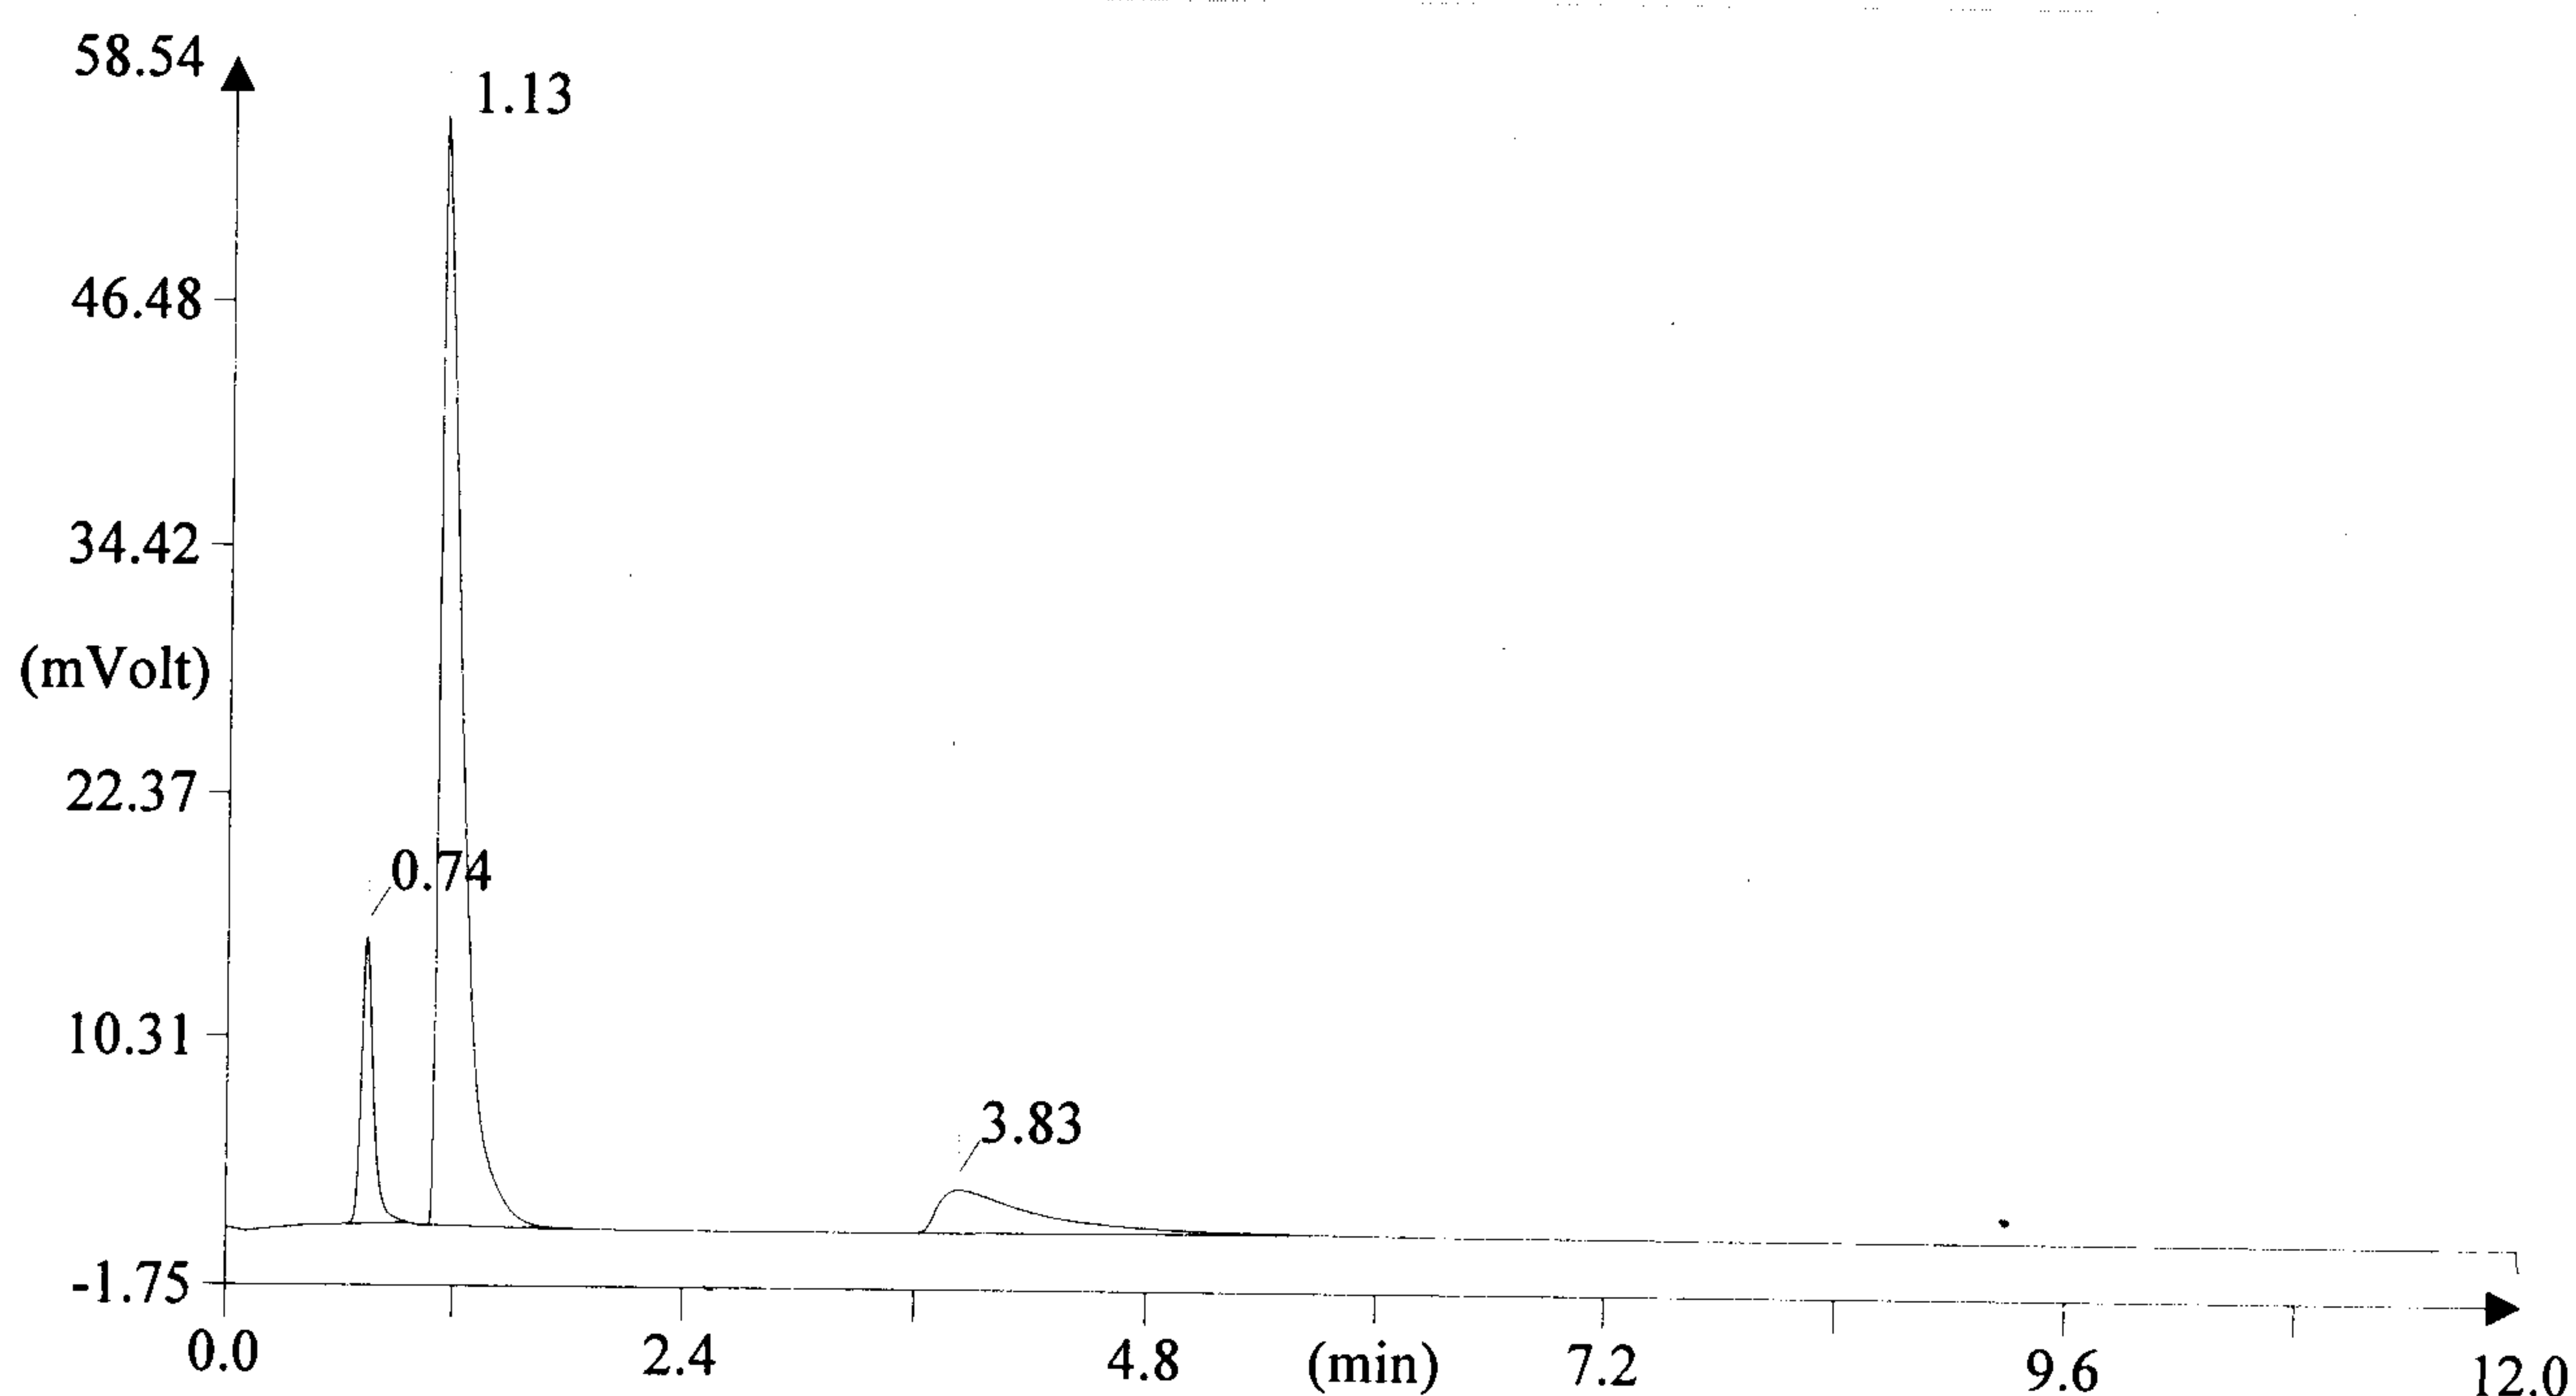

| Element Name | Element % | Ret. Time |
|--------------|-----------|-----------|
| Nitrogen     | 9.15      | 0.74      |
| Carbon       | 74.16     | 1.13      |
| Hydrogen     | 5.49      | 3.83      |

*(Signature)*

FLASH EA 1112 SERIES CHN REPORT  
SCHOOL OF CHEMISTRY  
UNIVERSITY OF HYDERABAD

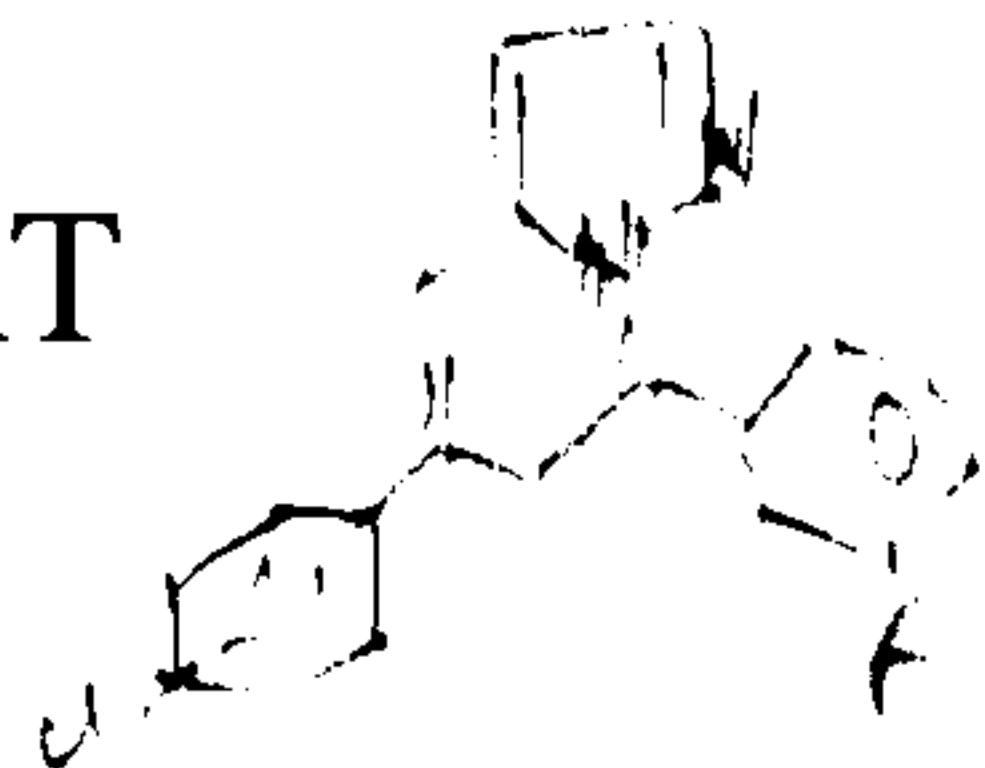

Method filename: E:\Program Files\Thermo Finnigan\Eager 300 for EA1112\DATA\Sys\_data\_ex  
Sample ID: MBC-12-40-T2 (# 50)  
Analysis type: UnkNown  
Chromatogram filename: UNK-27052011-10.dat  
Sample weight: 1.361

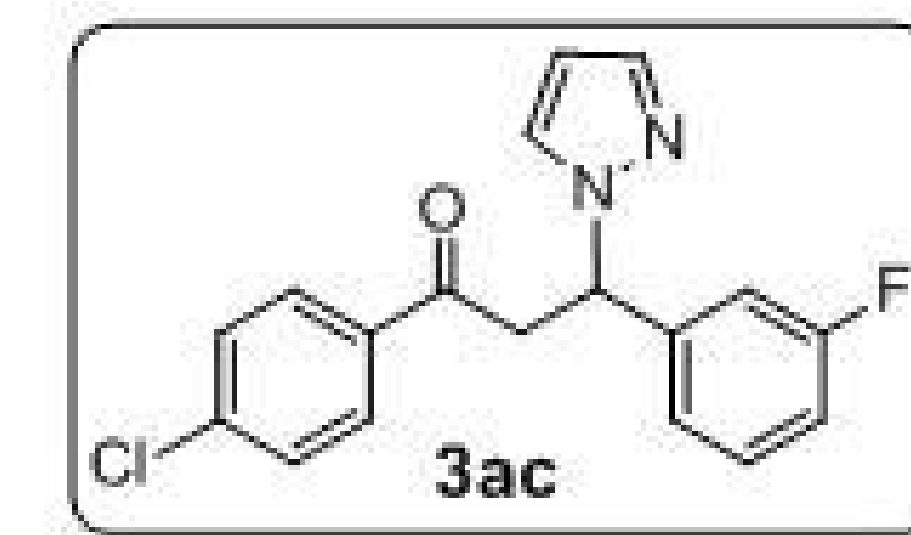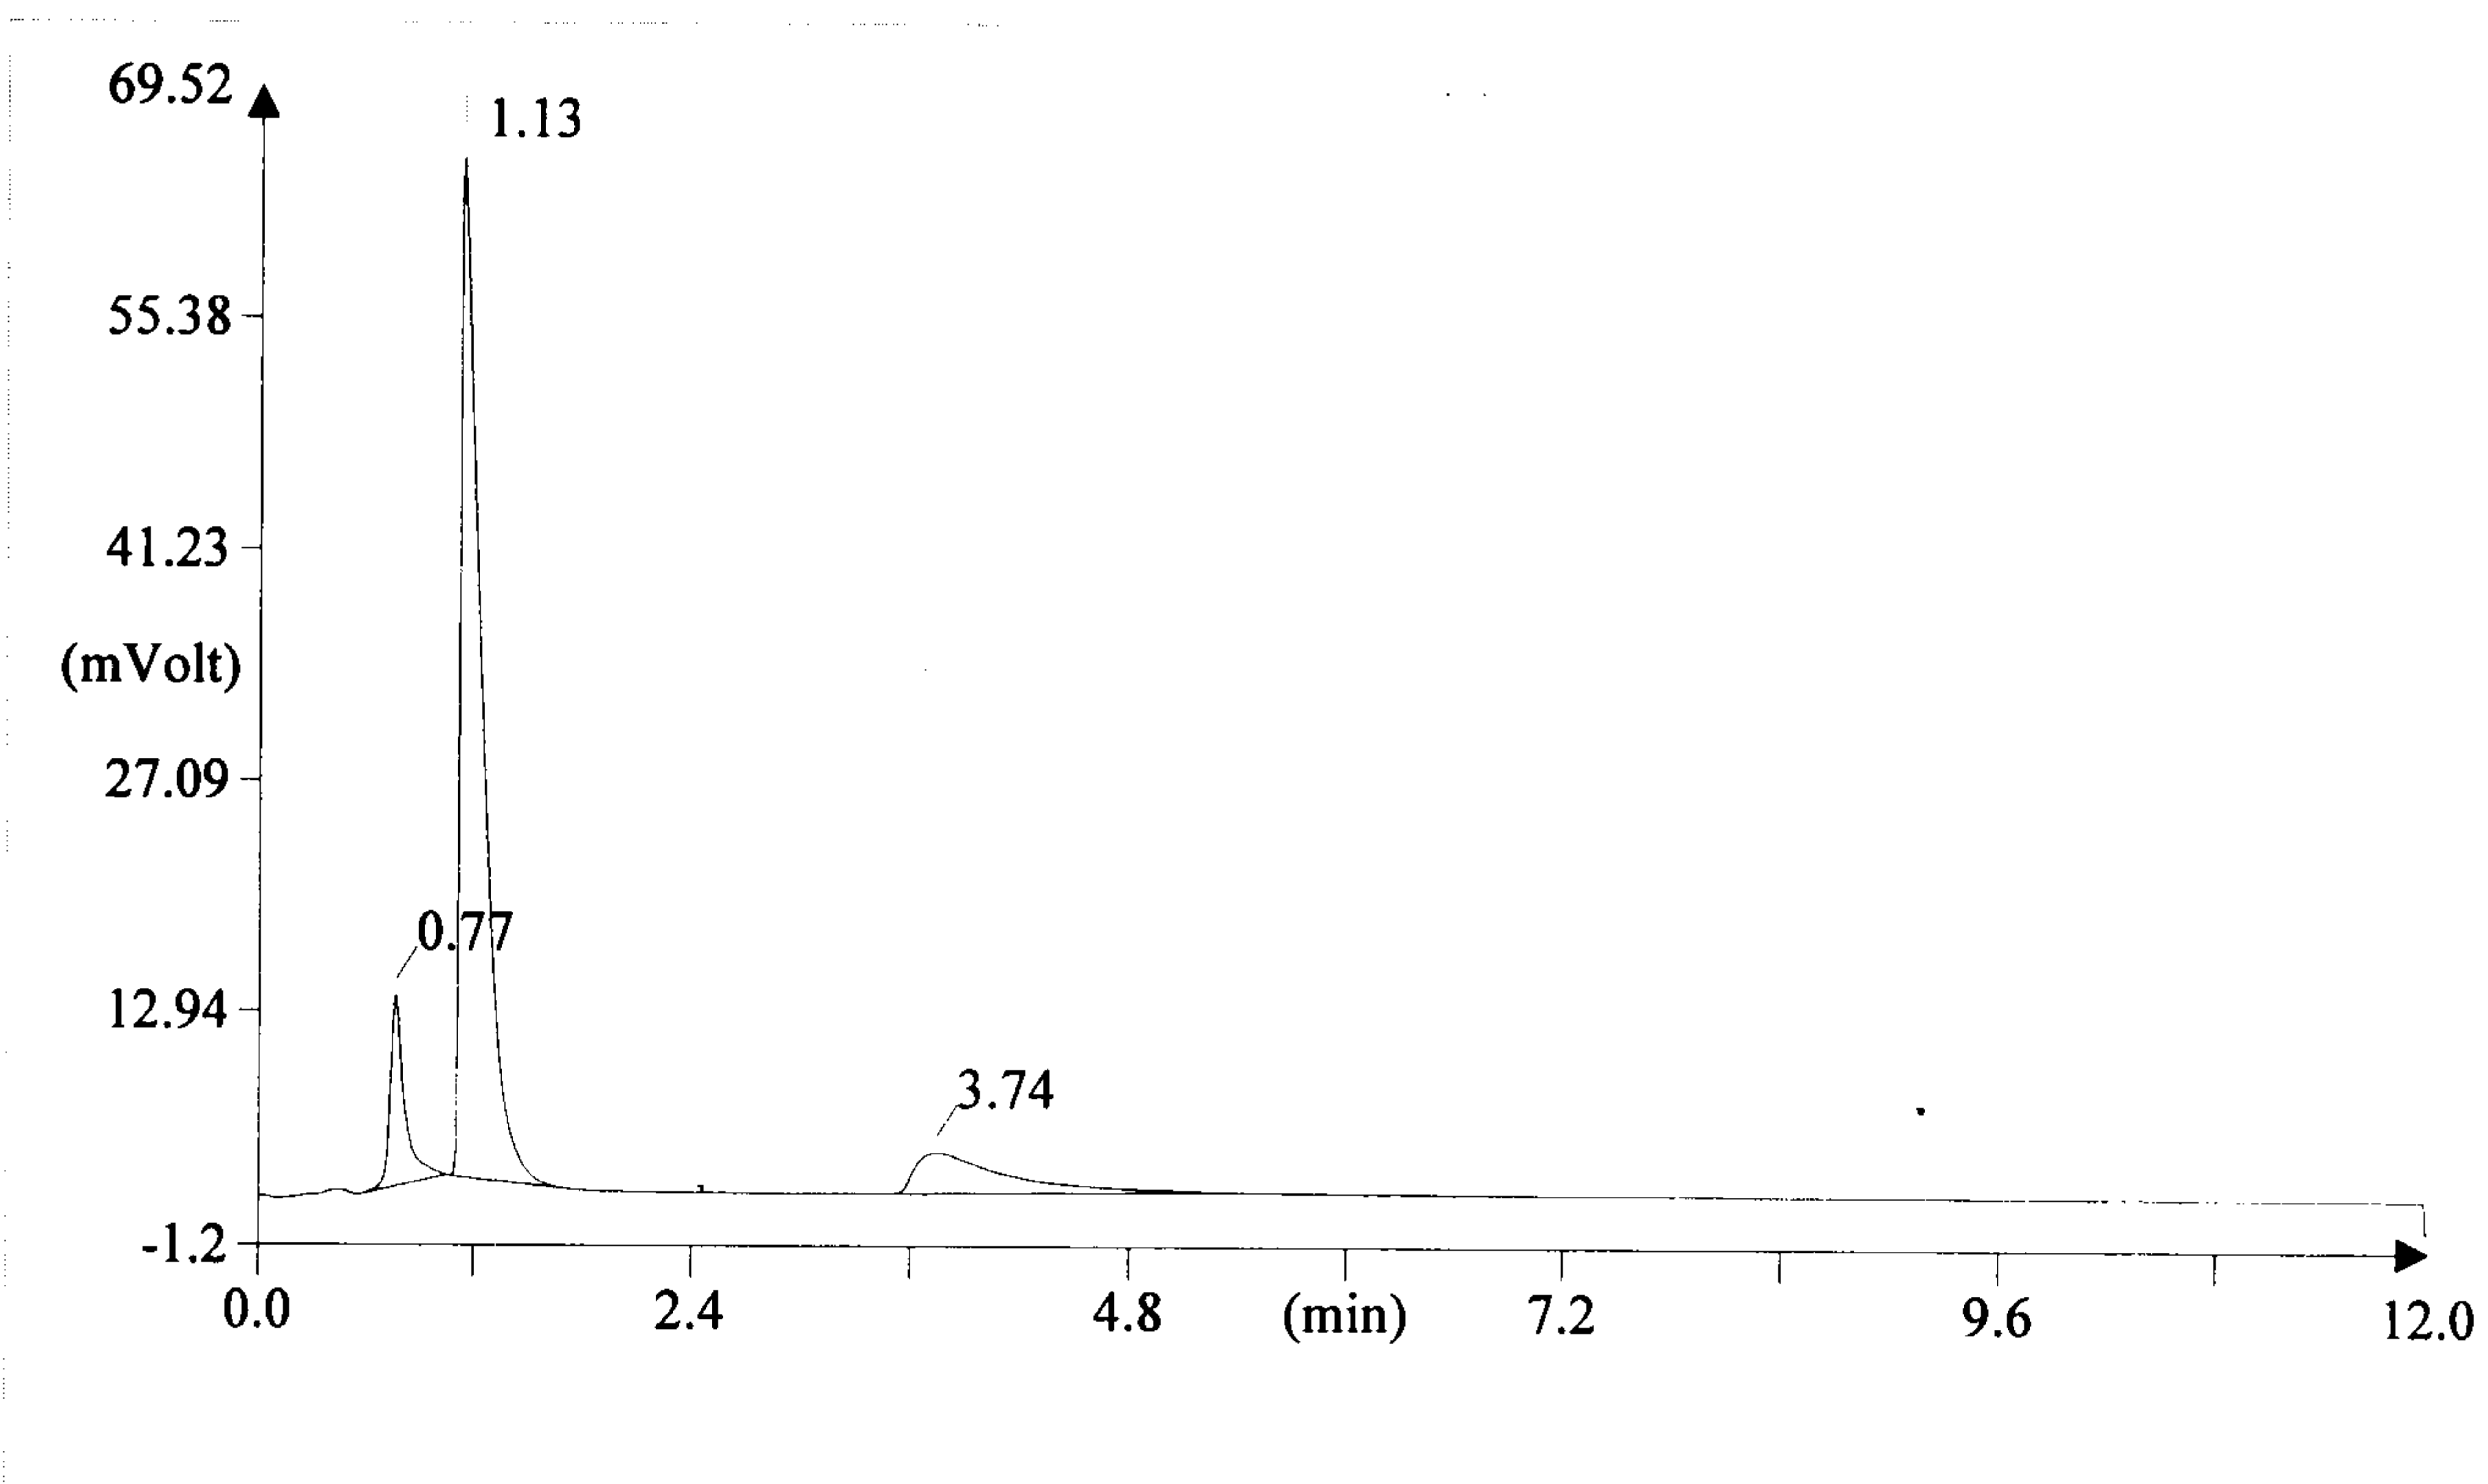

| Element Name | Element % | Ret. Time |
|--------------|-----------|-----------|
| Nitrogen     | 8.45      | 0.77      |
| Carbon       | 65.81     | 1.13      |
| Hydrogen     | 4.23      | 3.74      |

*OSR*

# FLASH EA 1112 SERIES CHN REPORT

## SCHOOL OF CHEMISTRY

## UNIVERSITY OF HYDERABAD

Method filename: I:\Program Files\Thermo Finnigan\Eager 300 for EA1112\DATA\Sys\_data\_exa  
 Sample ID: MBC-11-14-T2 (# 14)  
 Analysis type: UnkNown  
 Chromatogram filename: UNK-28022011-14.dat  
 Sample weight: .994

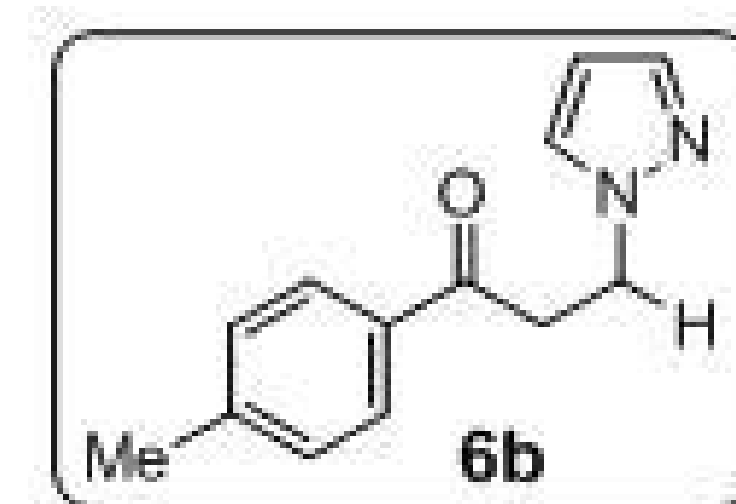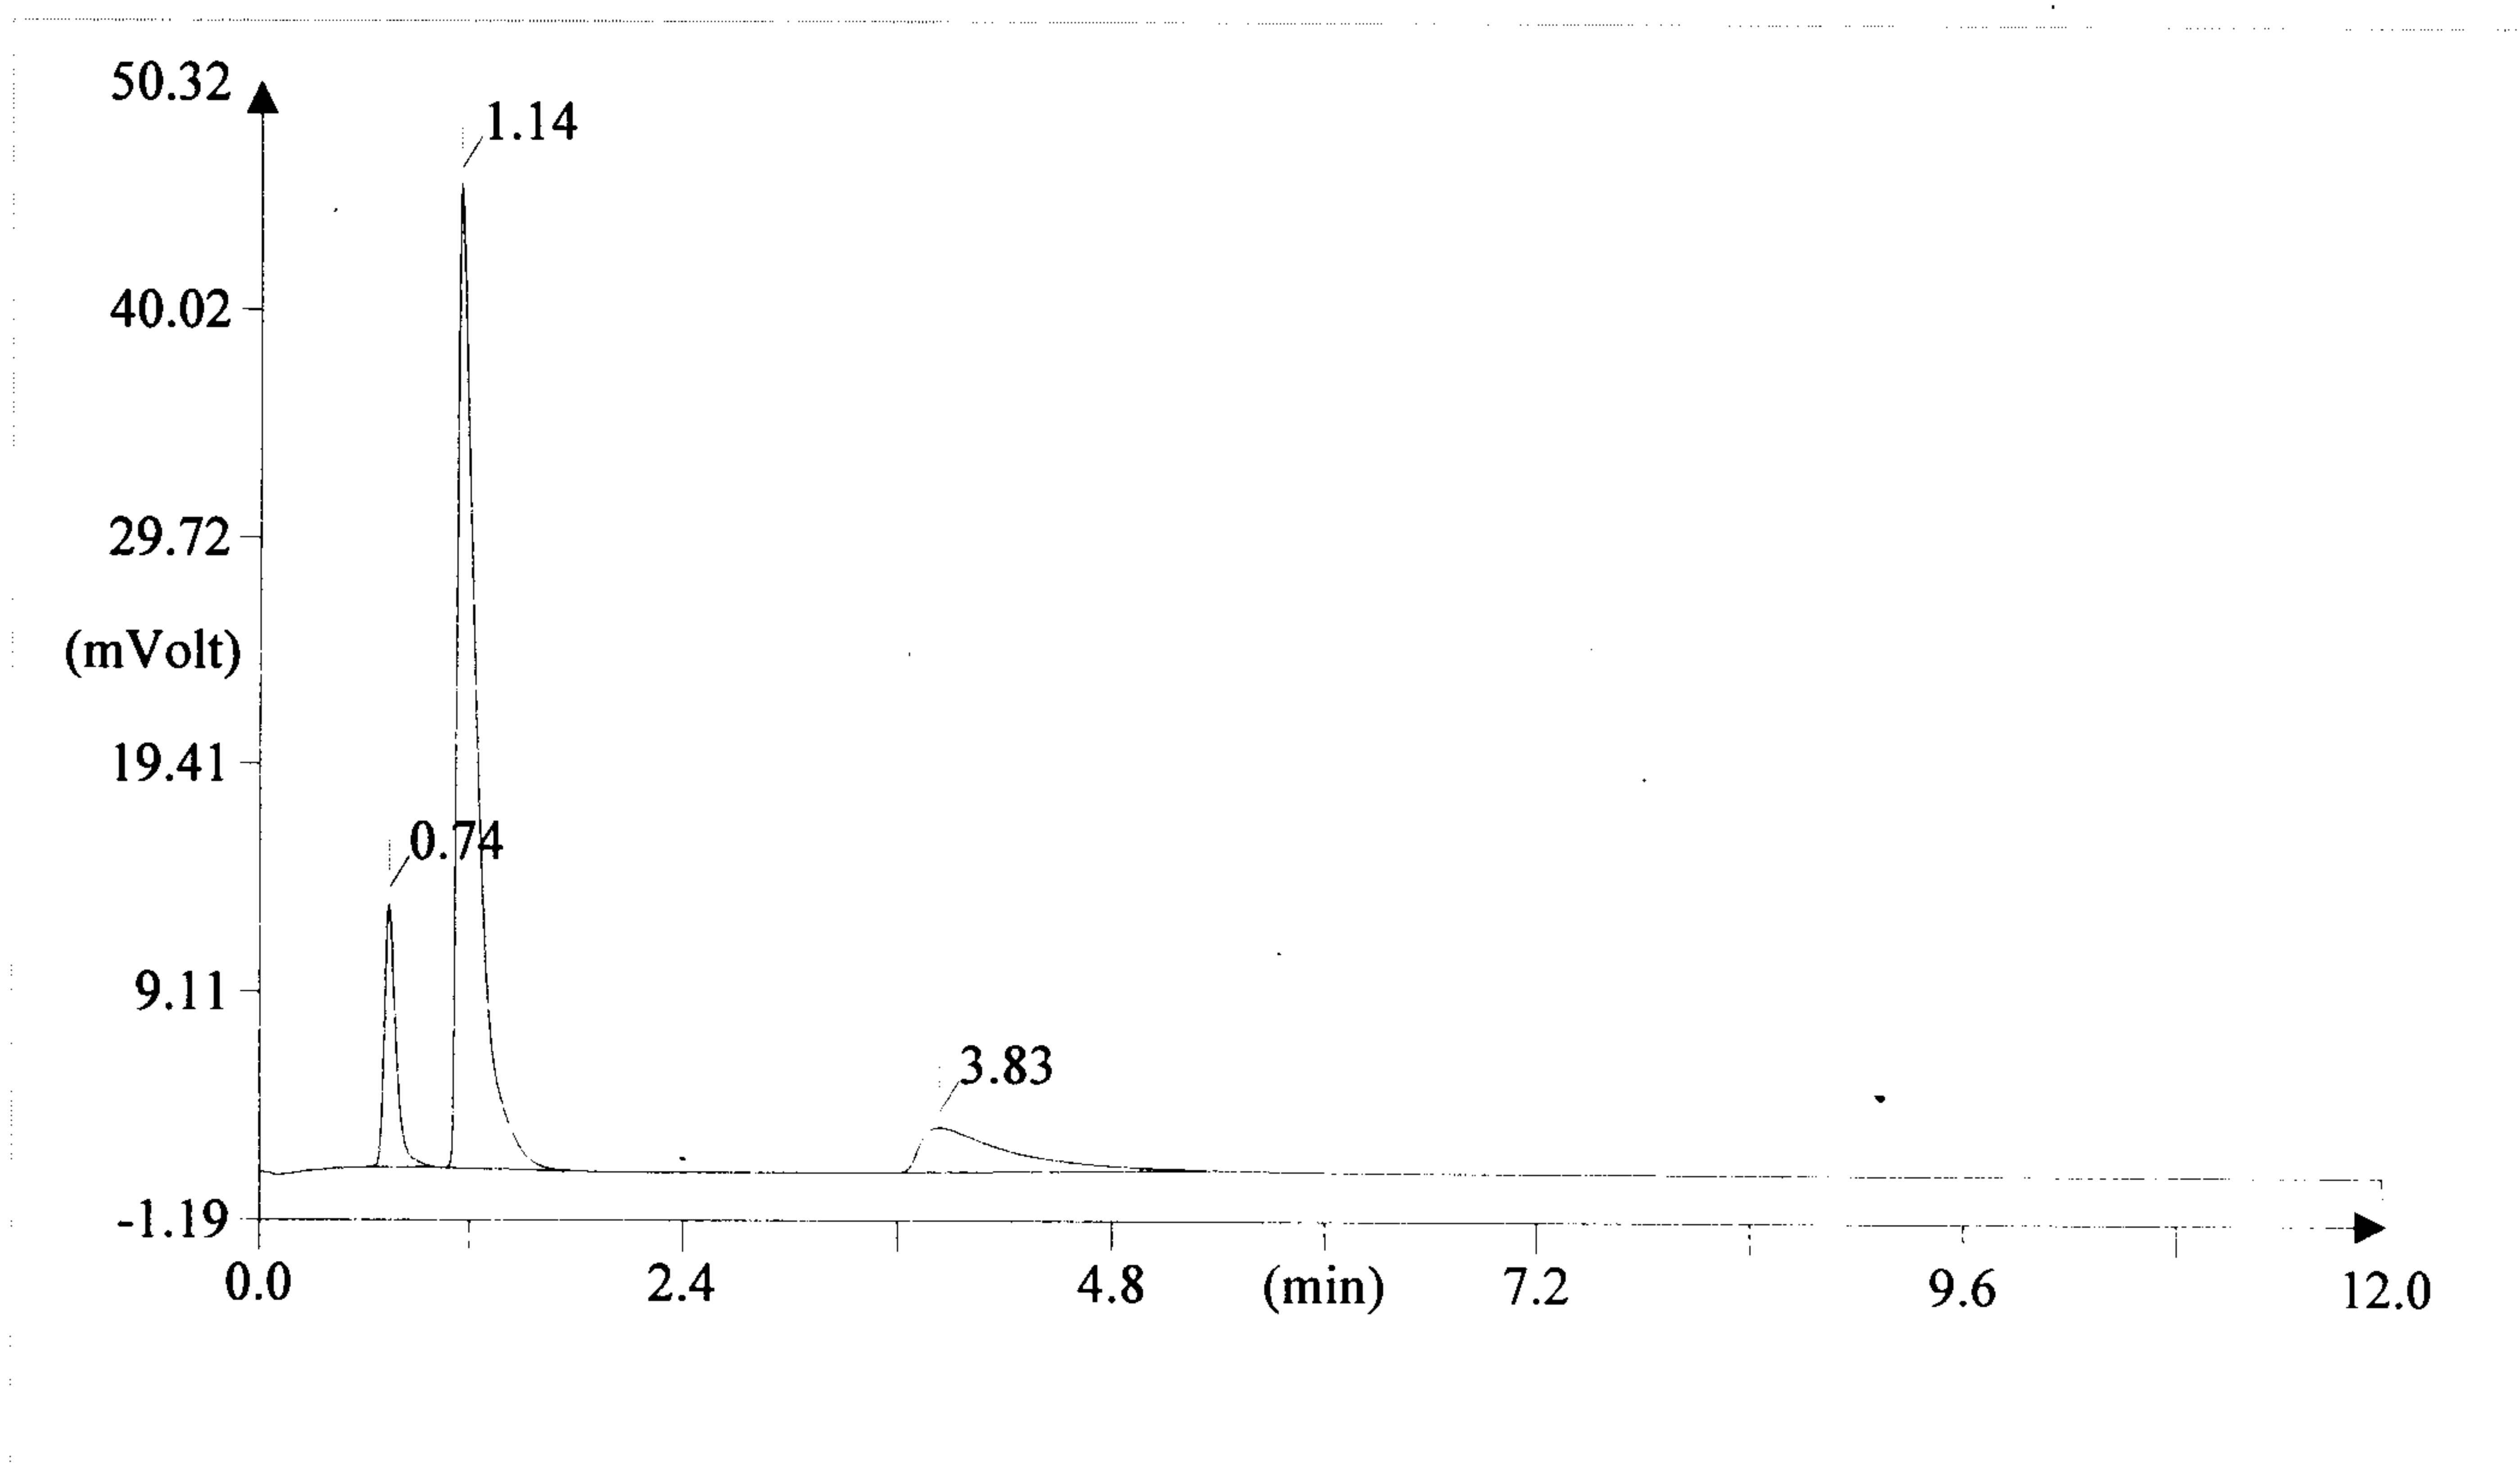

| Element Name | Element % | Ret. Time |
|--------------|-----------|-----------|
| Nitrogen     | 13. 15    | 0. 74     |
| Carbon       | 72. 91    | 1. 14     |
| Hydrogen     | 6. 51     | 3. 83     |

*Handwritten signature/initials*



# FLASH EA 1112 SERIES CHN REPORT

## SCHOOL OF CHEMISTRY

## UNIVERSITY OF HYDERABAD

Method filename: I:\Program Files\Thermo Finnigan\Eager 300 for EA1112\DATA\Sys\_data\_exa  
Sample ID: MBC-11-17-T2 (# 37)  
Analysis type: UnkNown  
Chromatogram filename: UNK-13122010-17.dat  
Sample weight: 1.113

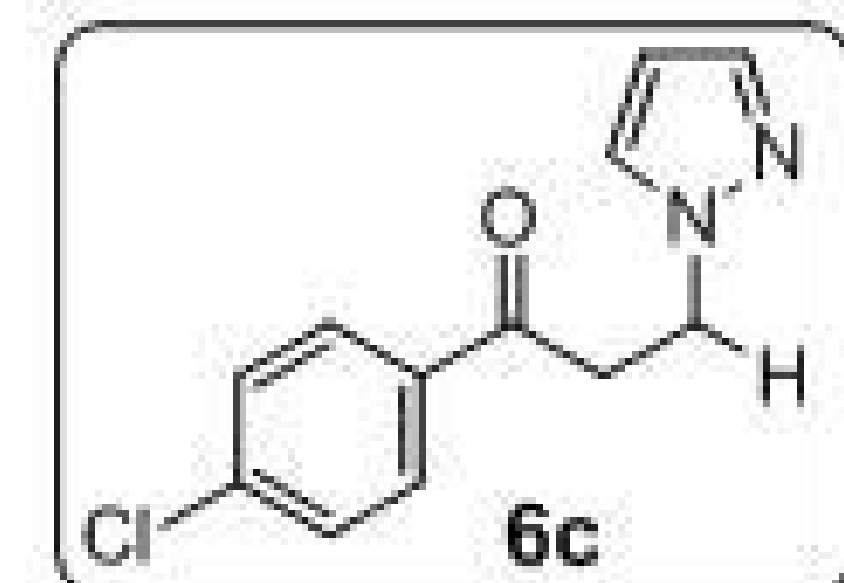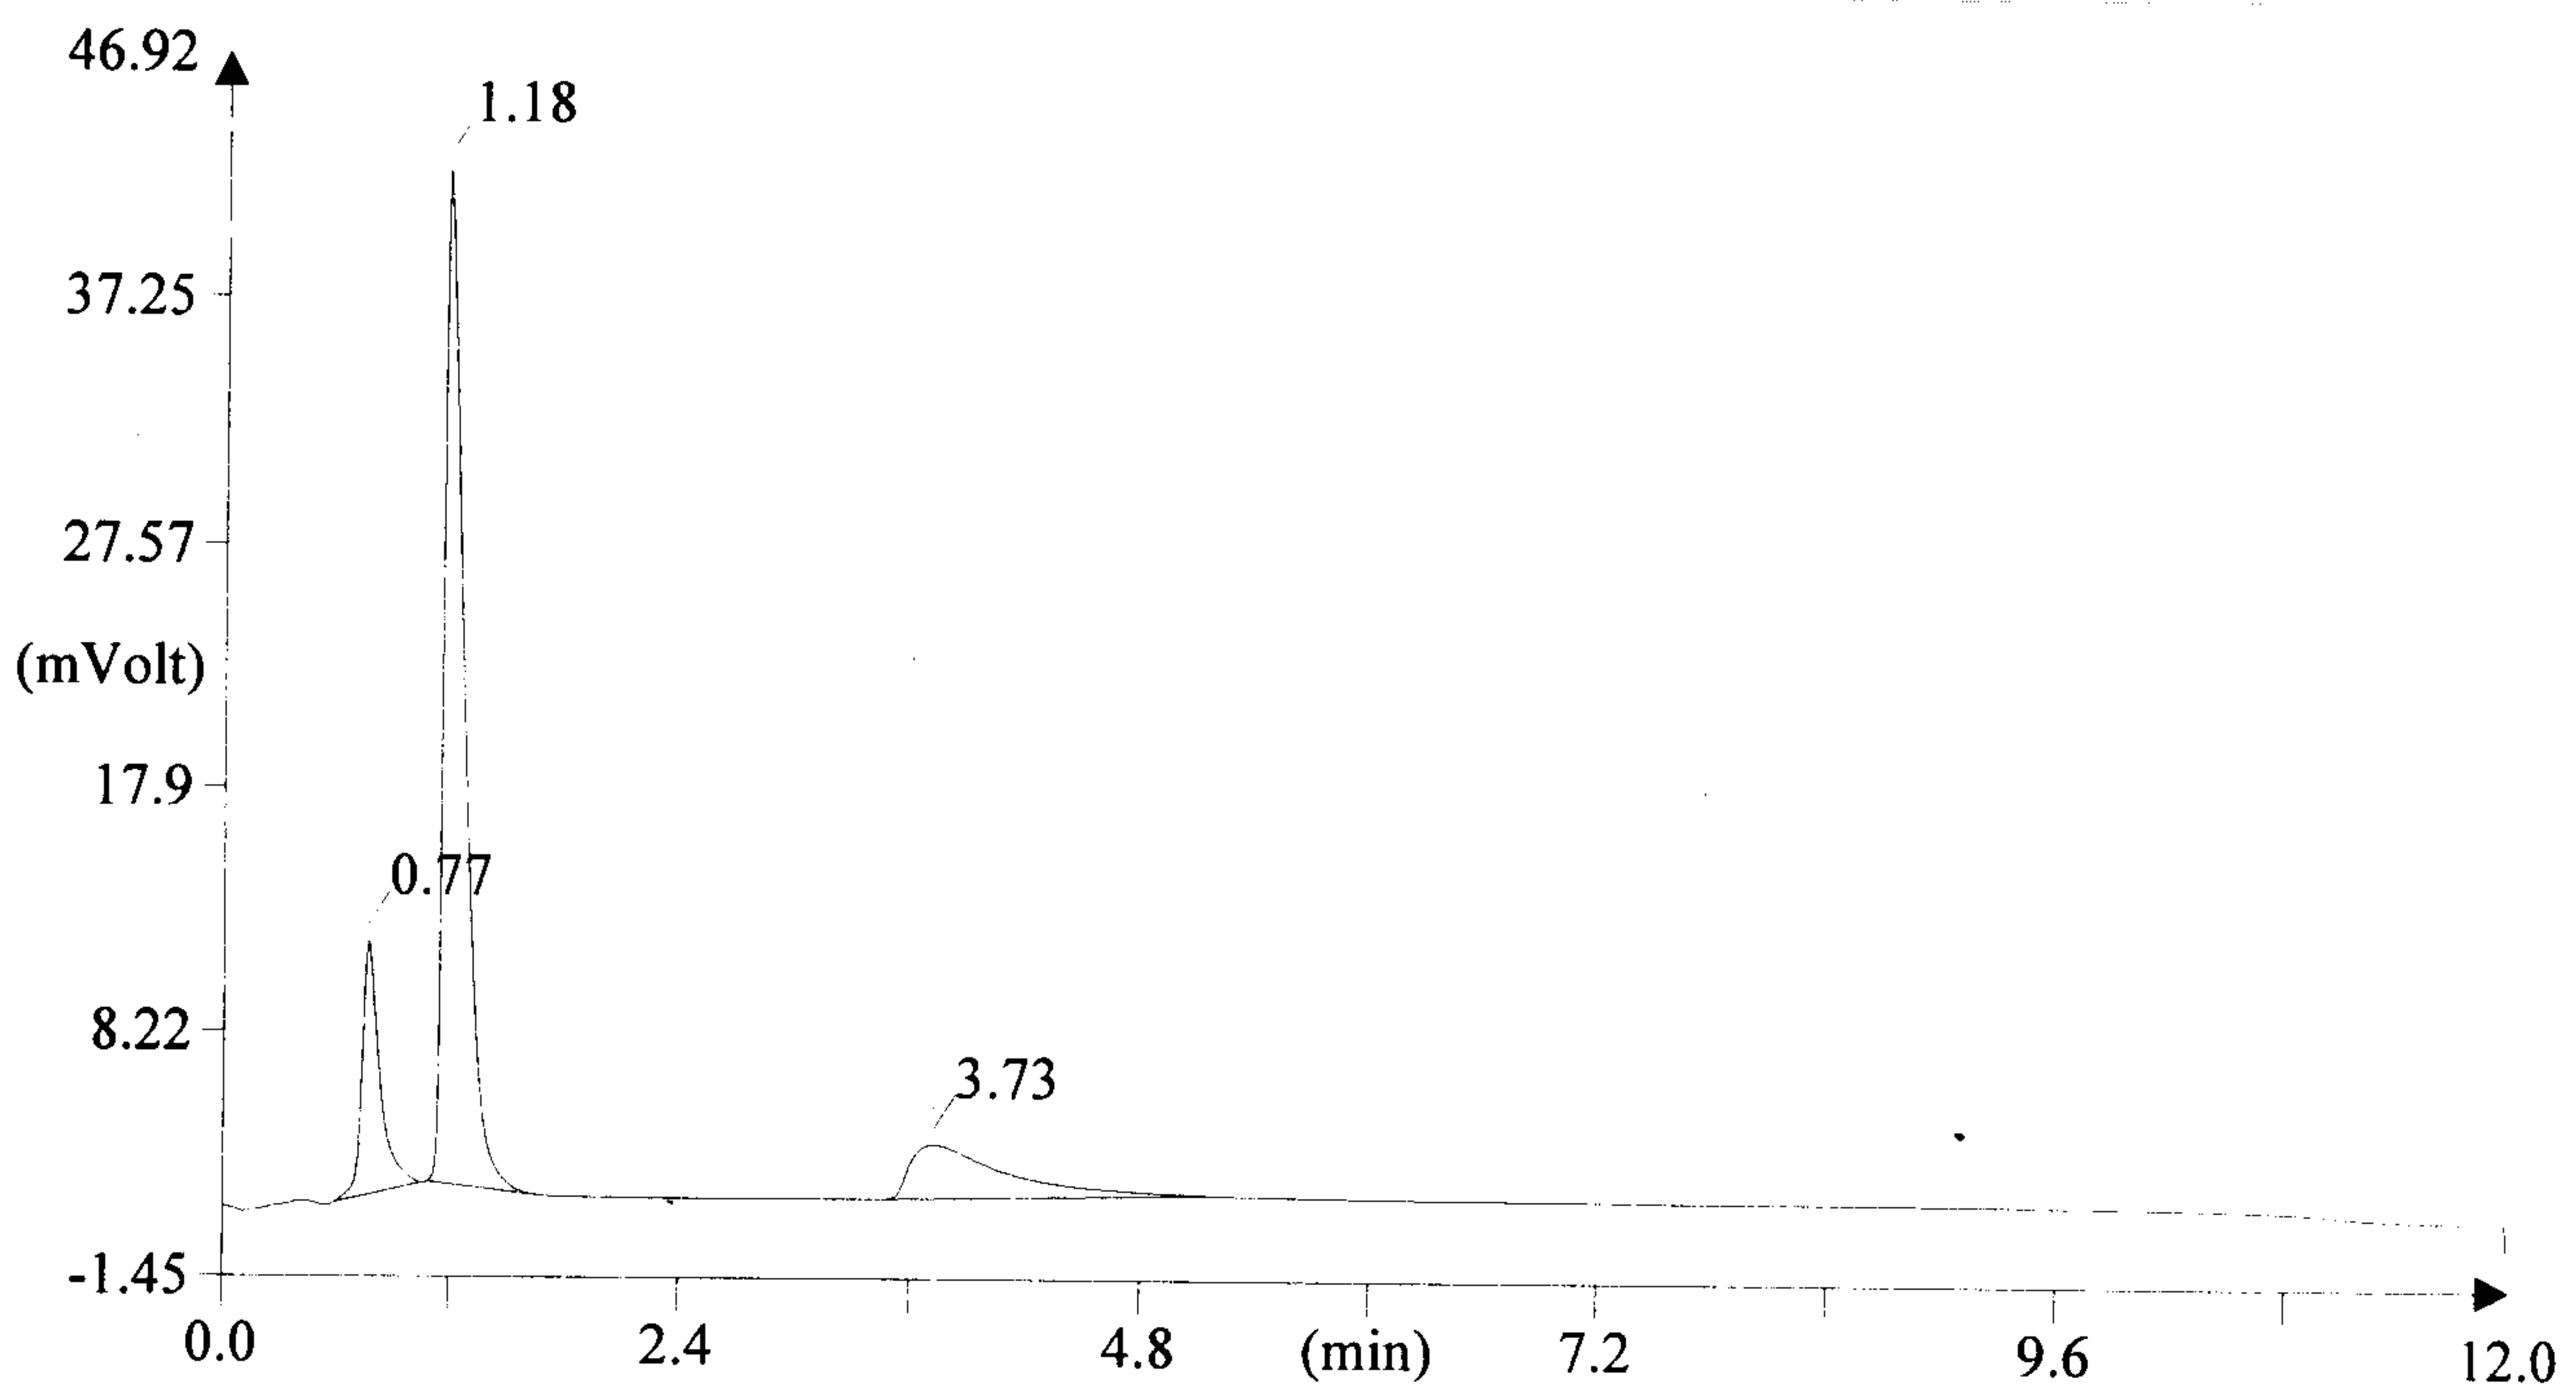

| Element Name | Element % | Ret. Time |
|--------------|-----------|-----------|
| Nitrogen     | 11. 85    | 0. 77     |
| Carbon       | 61. 52    | 1. 18     |
| Hydrogen     | 4. 66     | 3. 73     |

*OSB*

# FLASH EA 1112 SERIES CHN REPORT

## SCHOOL OF CHEMISTRY

## UNIVERSITY OF HYDERABAD

Method filename: I:\Program Files\Thermo Finnigan\Eager 300 for EA1112\DATA\Sys\_data\_exa  
Sample ID: MBC-11-18-T2 (# 36)  
Analysis type: UnkNown  
Chromatogram filename: UNK-13122010-16.dat  
Sample weight: 1.315

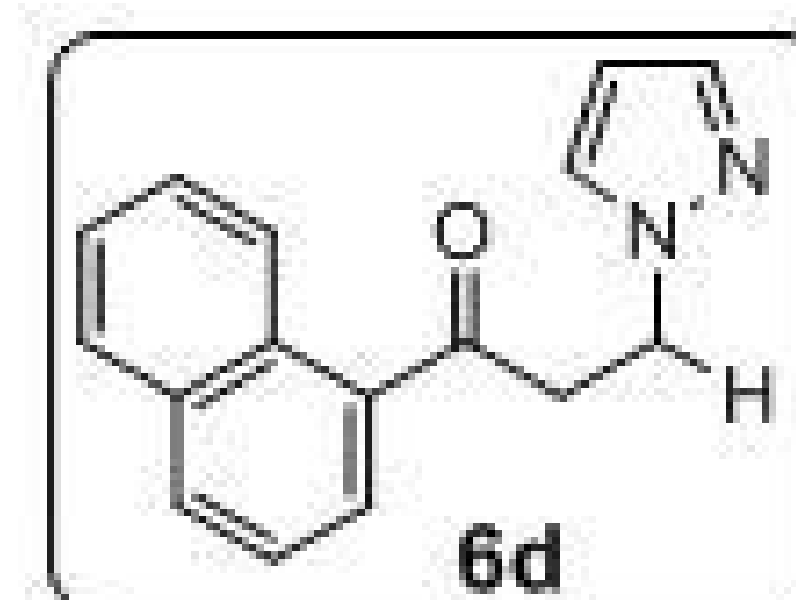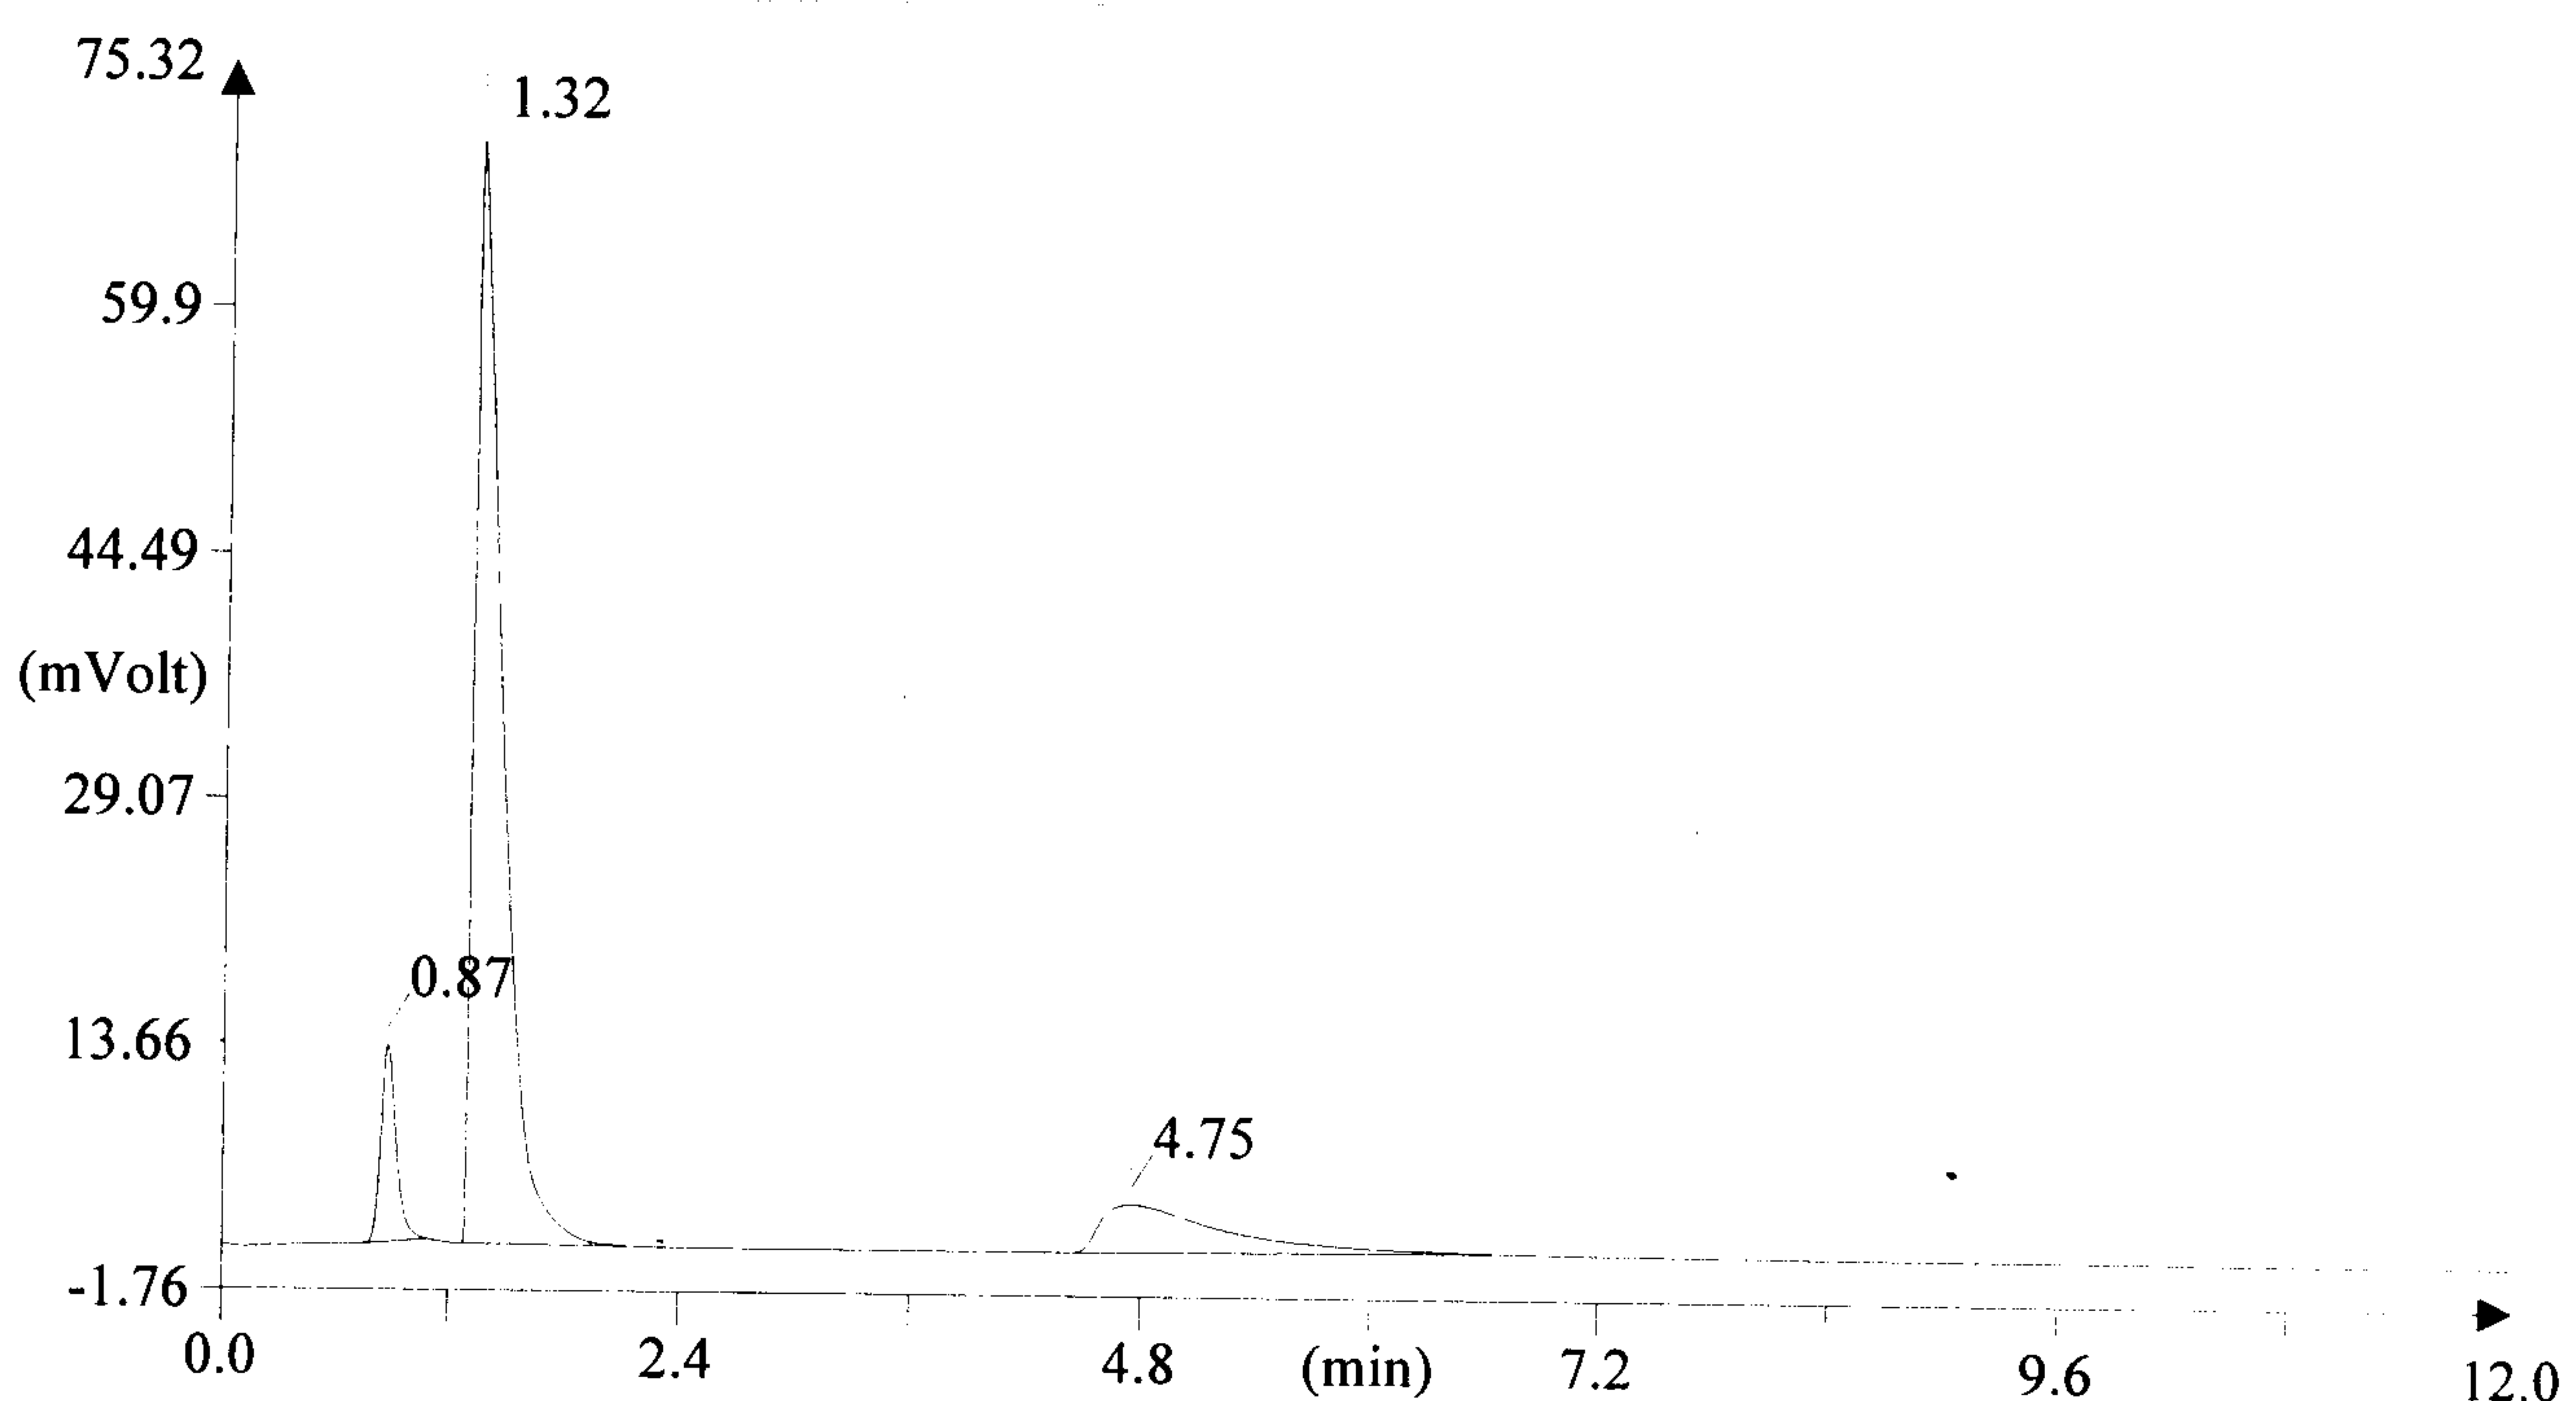

| Element Name | Element % | Ret. Time |
|--------------|-----------|-----------|
| Nitrogen     | 11. 25    | 0. 87     |
| Carbon       | 76. 62    | 1. 32     |
| Hydrogen     | 5. 58     | 4. 75     |

*(Signature)*

# FLASH EA 1112 SERIES CHN REPORT

## SCHOOL OF CHEMISTRY

## UNIVERSITY OF HYDERABAD

Method filename: I:\Program Files\Thermo Finnigan\Eager 300 for EA1112\DATA\Sys\_data\_exa  
 Sample ID: MBC-11-14-T1 (# 40)  
 Analysis type: UnkNown  
 Chromatogram filename: UNK-13122010-20.dat  
 Sample weight: 1.282

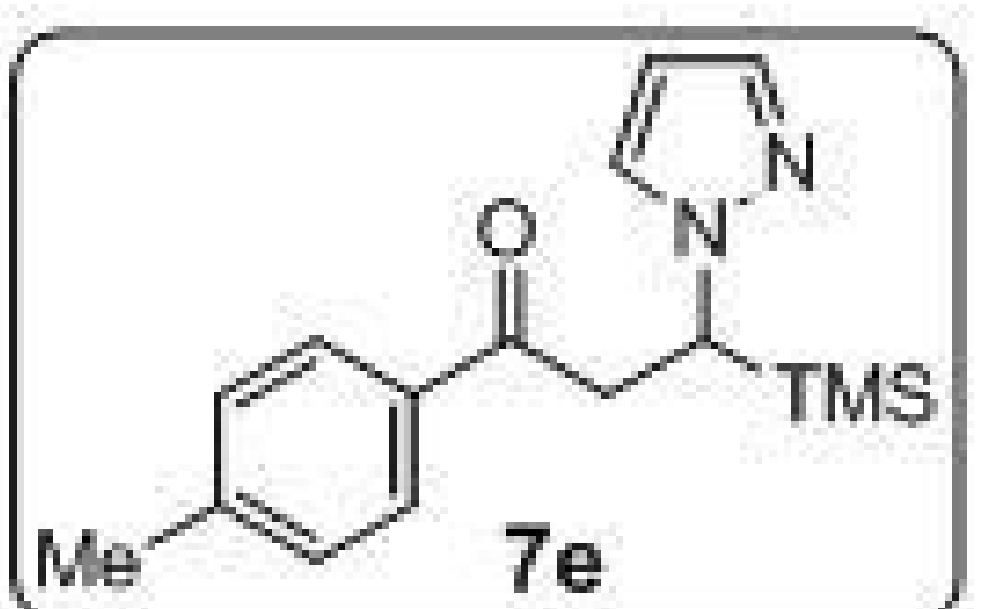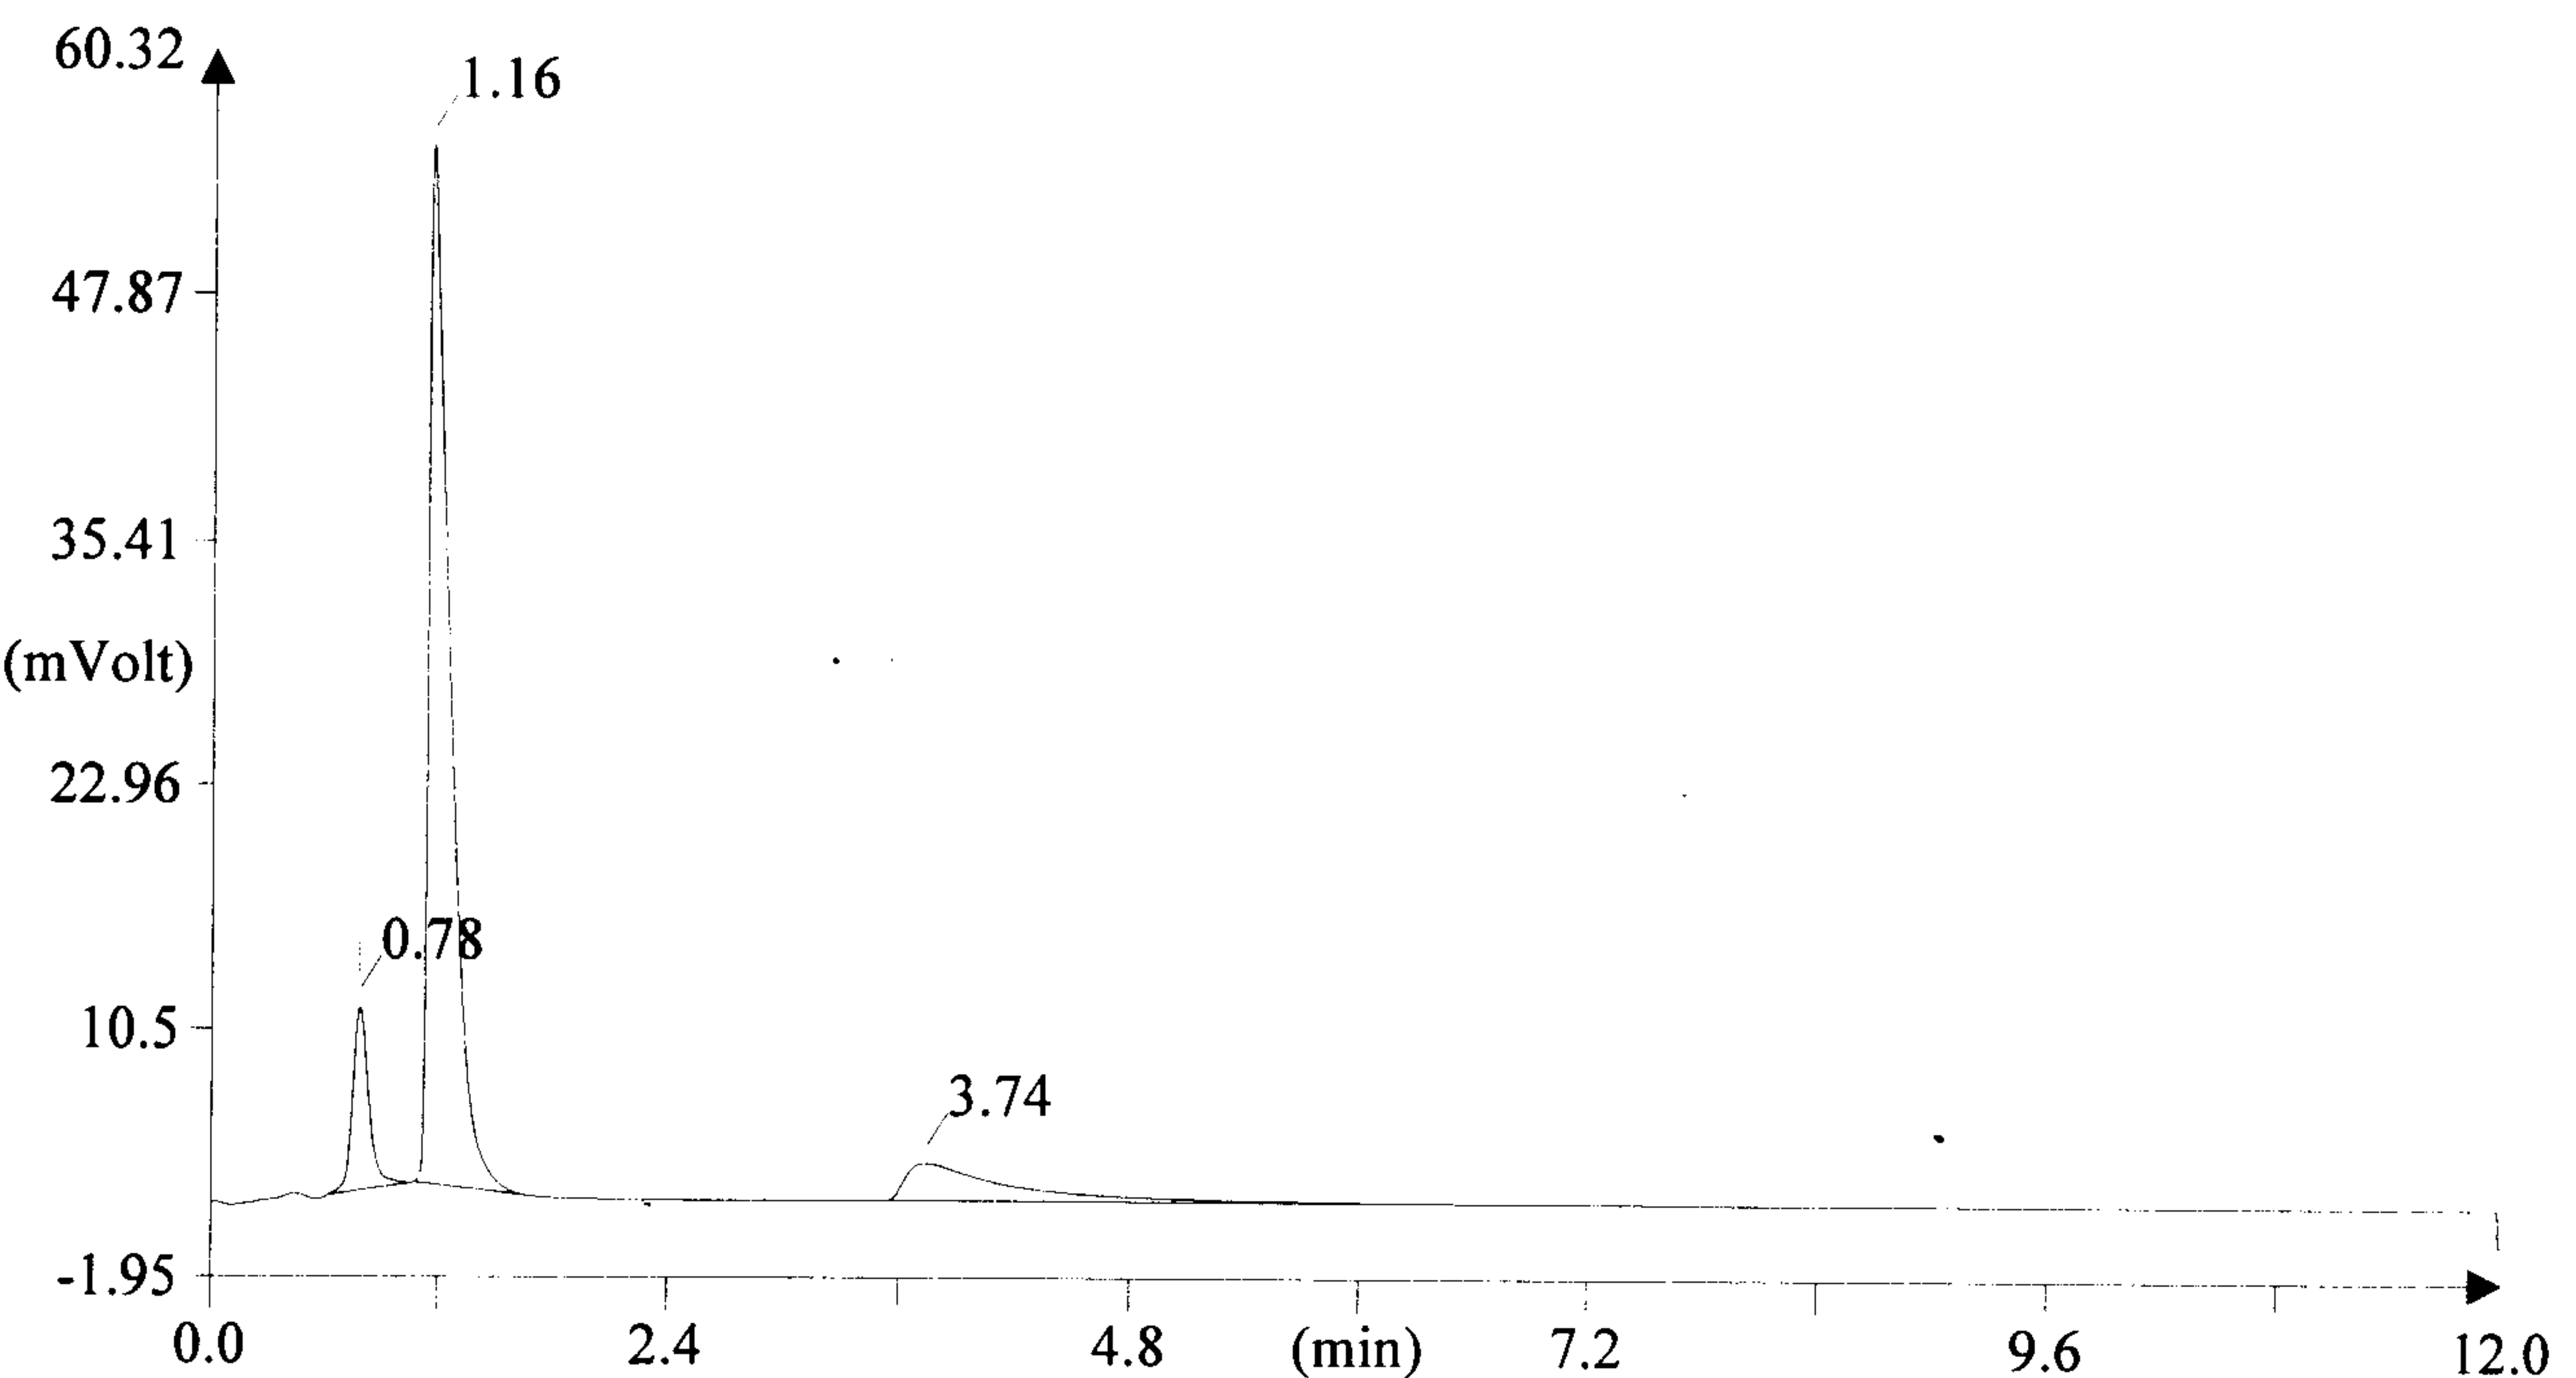

| Element Name | Element % | Ret. Time |
|--------------|-----------|-----------|
| Nitrogen     | 9.71      | 0.78      |
| Carbon       | 67.22     | 1.16      |
| Hydrogen     | 7.69      | 3.74      |

*(Signature)*



# FLASH EA 1112 SERIES CHN REPORT

## SCHOOL OF CHEMISTRY

## UNIVERSITY OF HYDERABAD

Method filename: I:\Program Files\Thermo Finnigan\Eager 300 for EA1112\DATA\Sys\_data\_exa  
Sample ID: MBC-11-17-T1 (# 39)  
Analysis type: UnkNown  
Chromatogram filename: UNK-13122010-19.dat  
Sample weight: 1.104

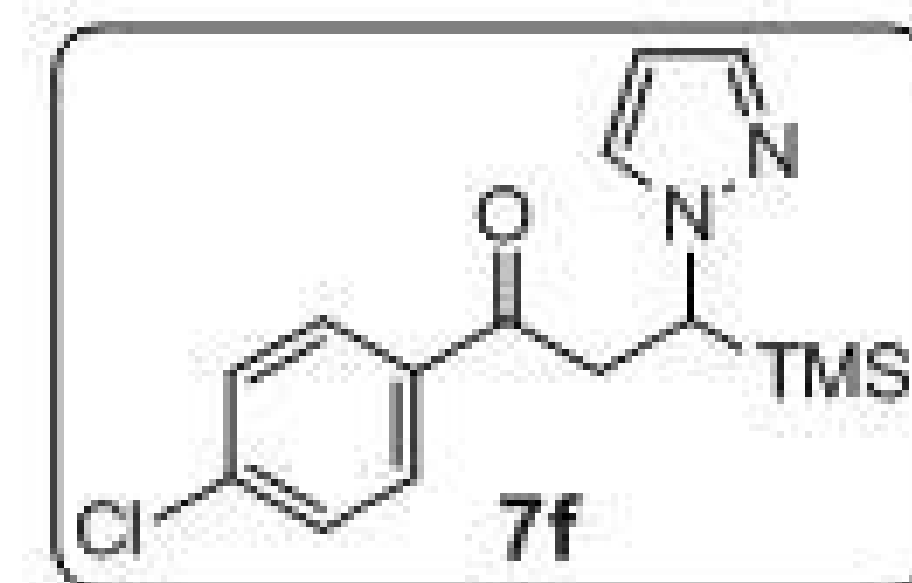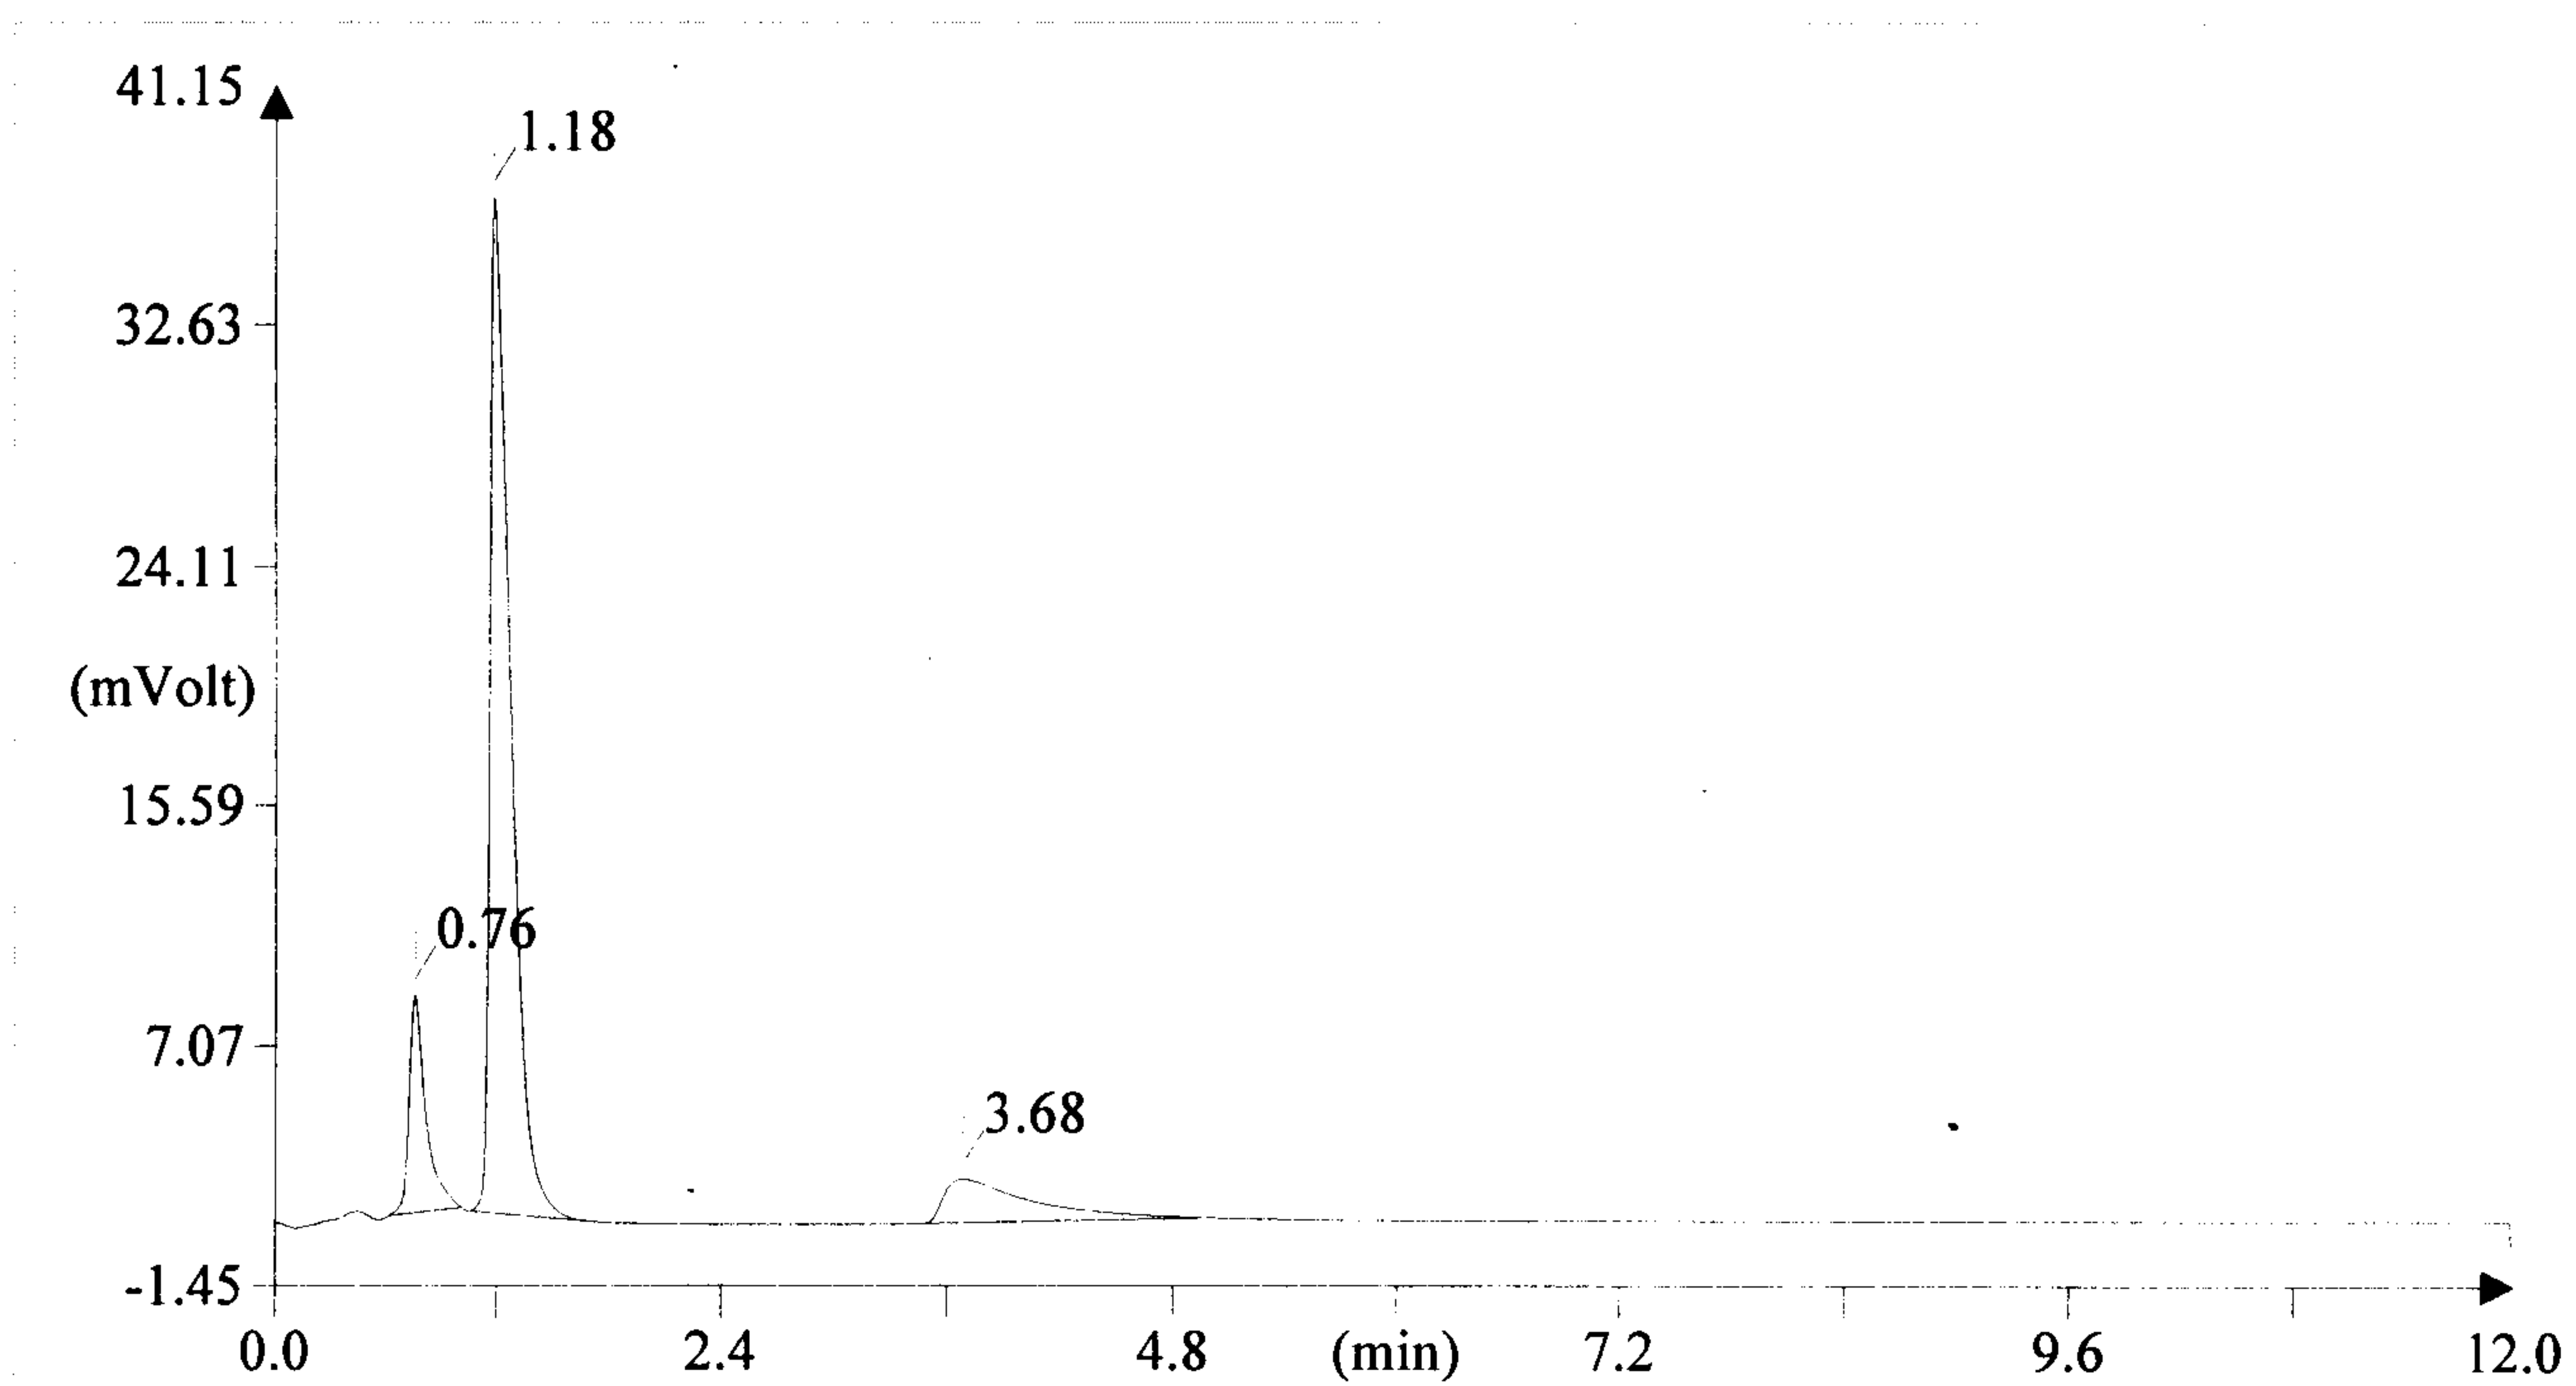

| Element Name | Element % | Ret. Time |
|--------------|-----------|-----------|
| Nitrogen     | 9. 21     | 0. 76     |
| Carbon       | 58. 62    | 1. 18     |
| Hydrogen     | 6. 21     | 3. 68     |

*Signature*

# FLASH EA 1112 SERIES CHN REPORT

## SCHOOL OF CHEMISTRY

## UNIVERSITY OF HYDERABAD

Method filename: I:\Program Files\Thermo Finnigan\Eager 300 for EA1112\DATA\Sys\_data\_exa  
Sample ID: MBC-11-18-T1 (# 38)  
Analysis type: UnkNown  
Chromatogram filename: UNK-13122010-18.dat  
Sample weight: 1.296

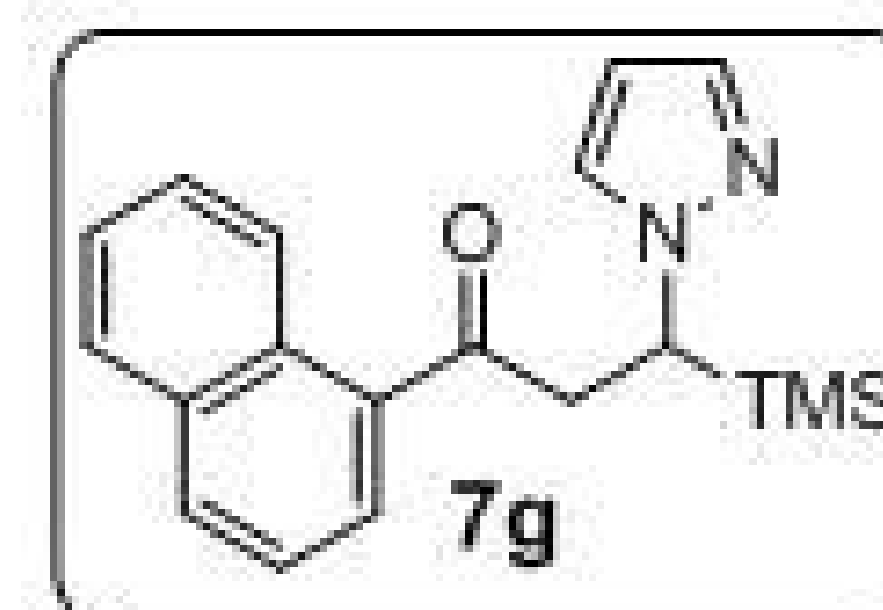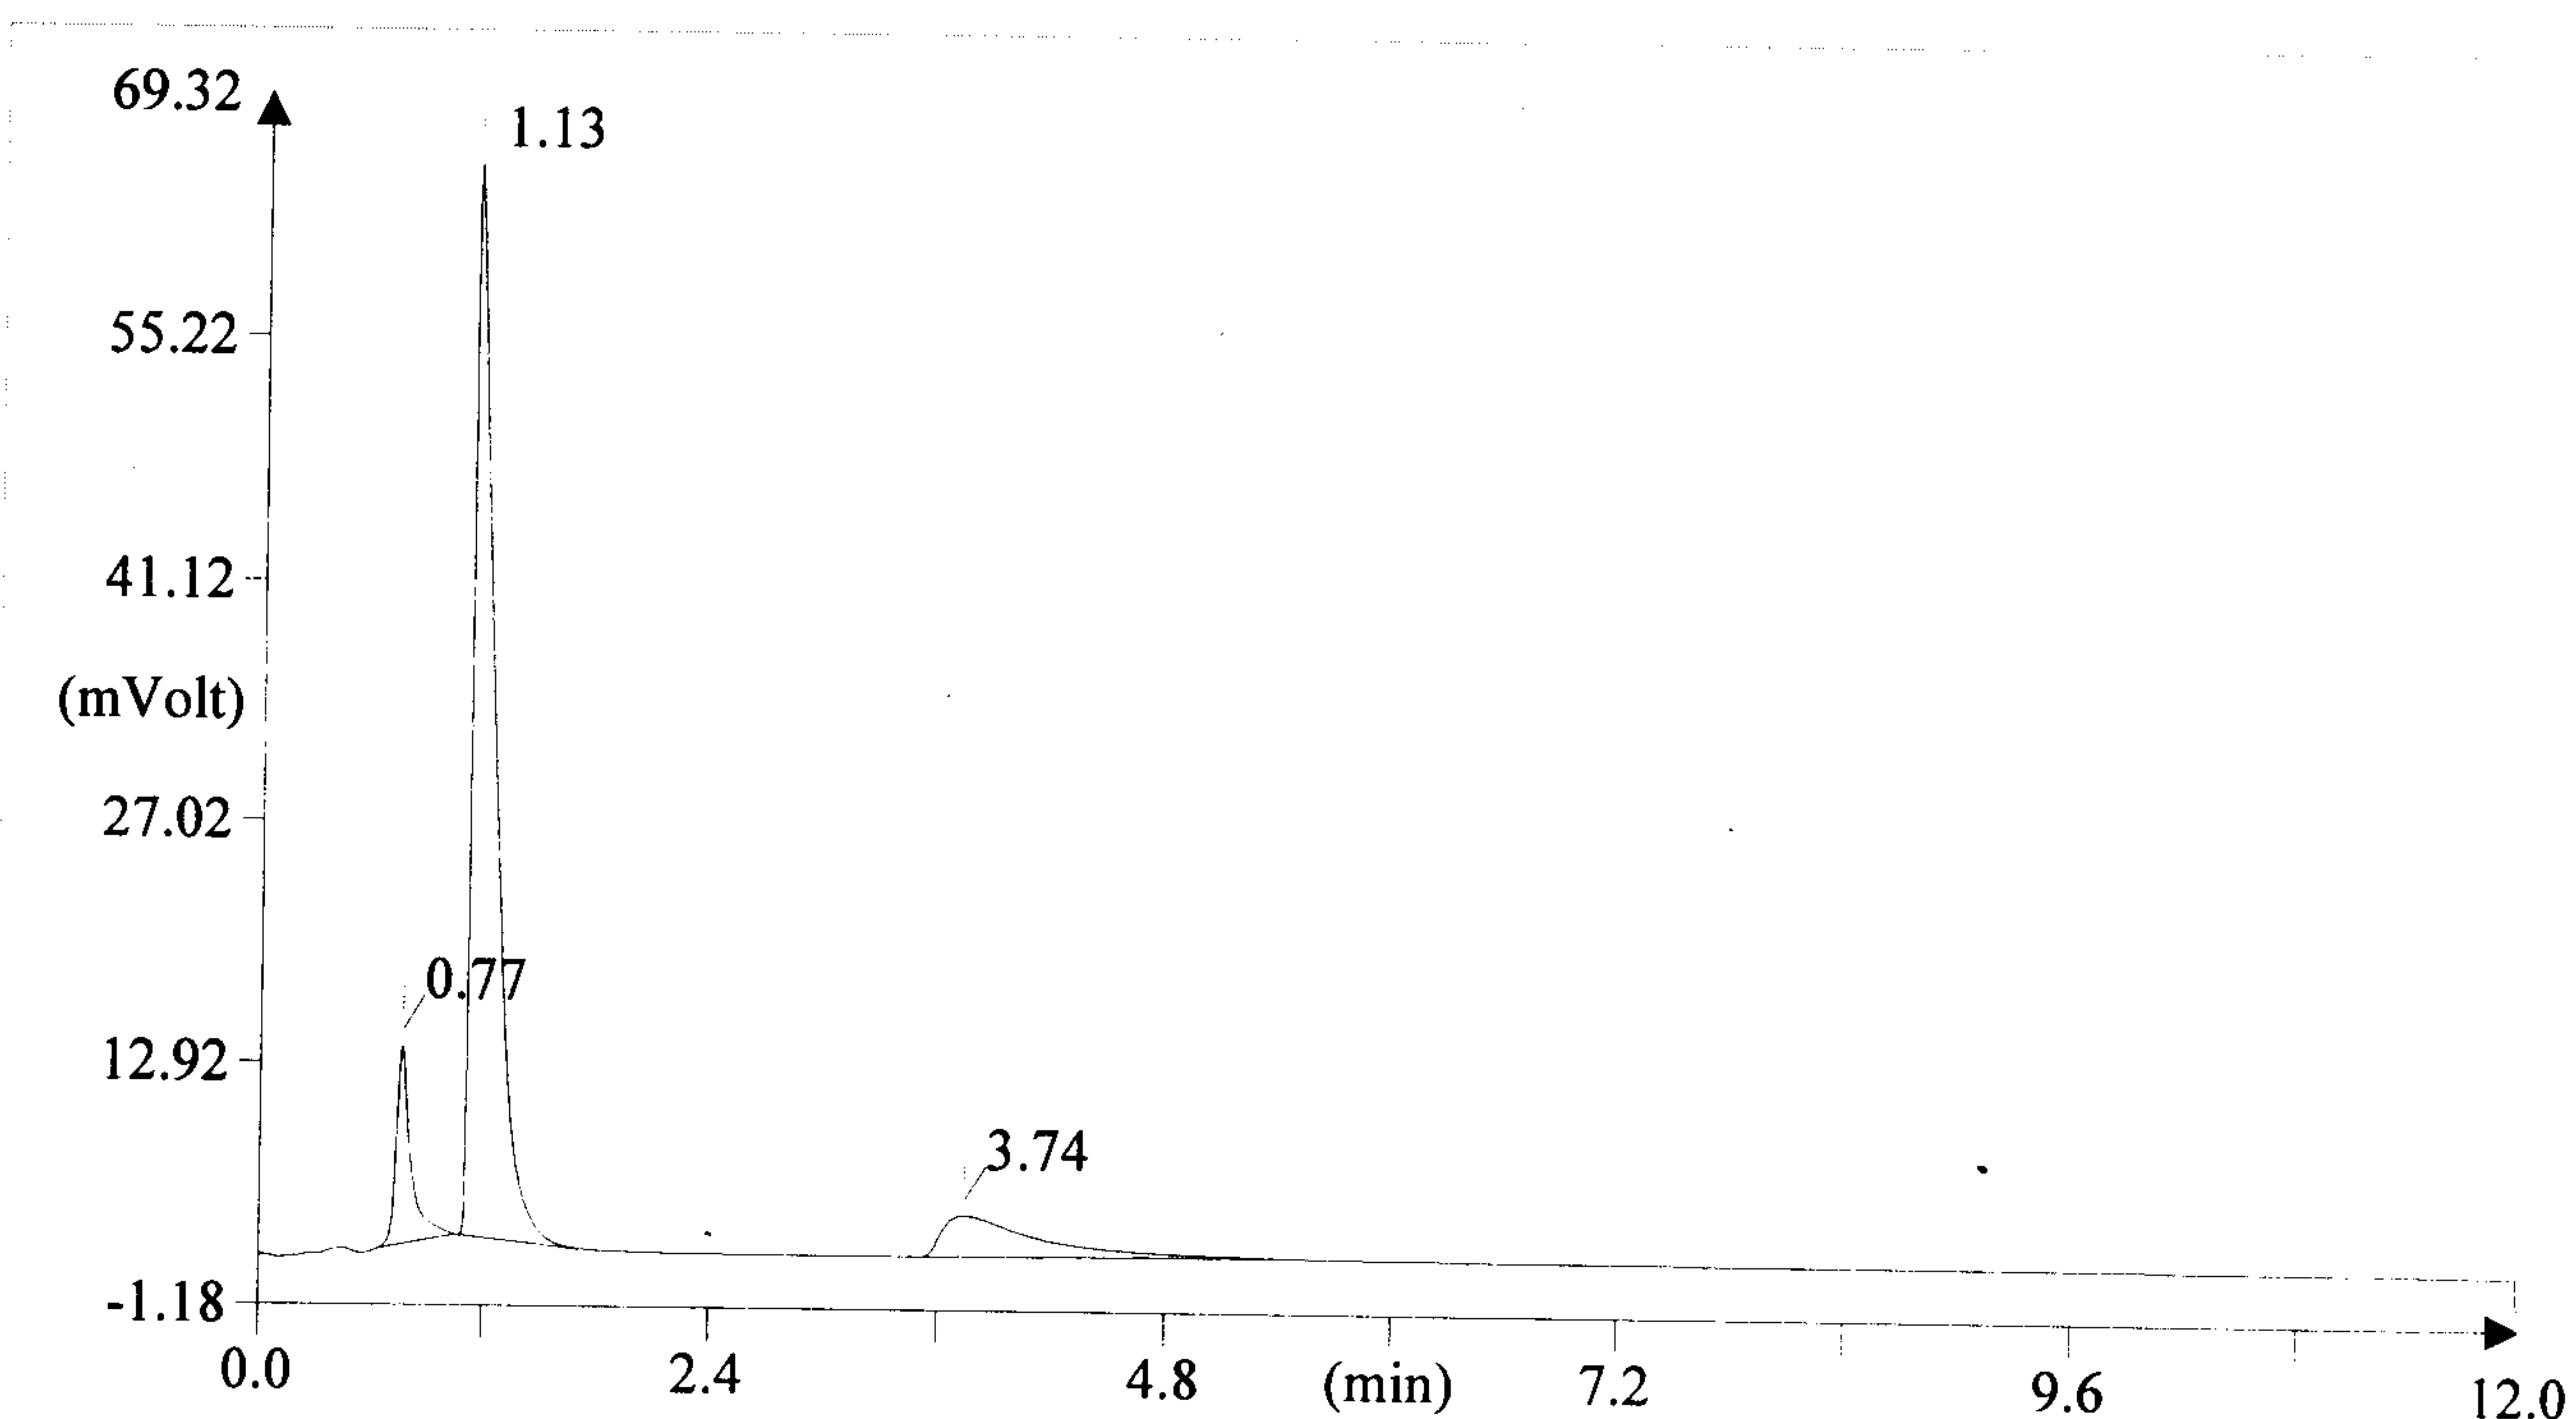

| Element Name | Element % | Ret. Time |
|--------------|-----------|-----------|
| Nitrogen     | 8. 61     | 0. 77     |
| Carbon       | 70. 65    | 1. 13     |
| Hydrogen     | 6. 91     | 3. 74     |

*Sh*

# FLASH EA 1112 SERIES CHN REPORT

## SCHOOL OF CHEMISTRY

## UNIVERSITY OF HYDERABAD

Method filename: E:\Program Files\Thermo Finnigan\Eager 300 for EA1112\DATA\Sys\_data\_ex  
 Sample ID: MBC-11-79-T2 (# 63)  
 Analysis type: UnkNown  
 Chromatogram filename: UNK-27052011-23.dat  
 Sample weight: 1.126

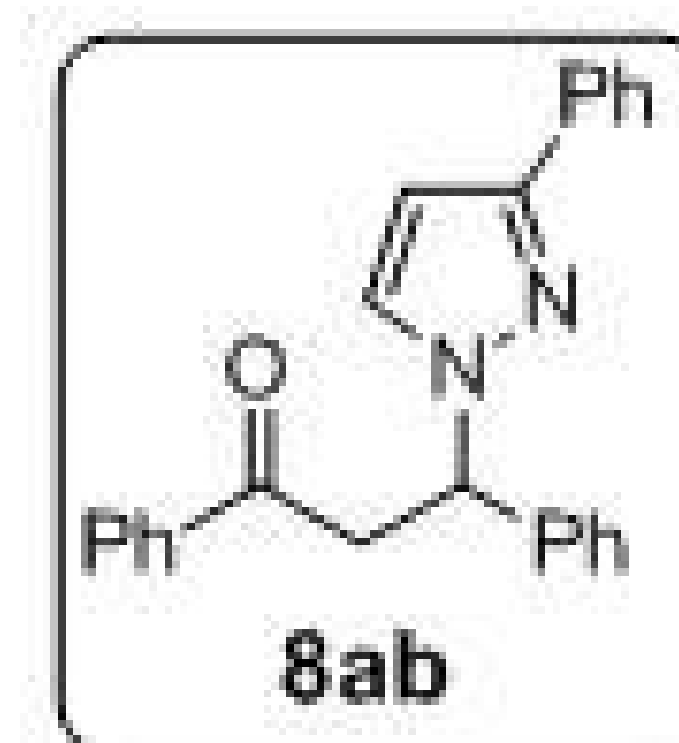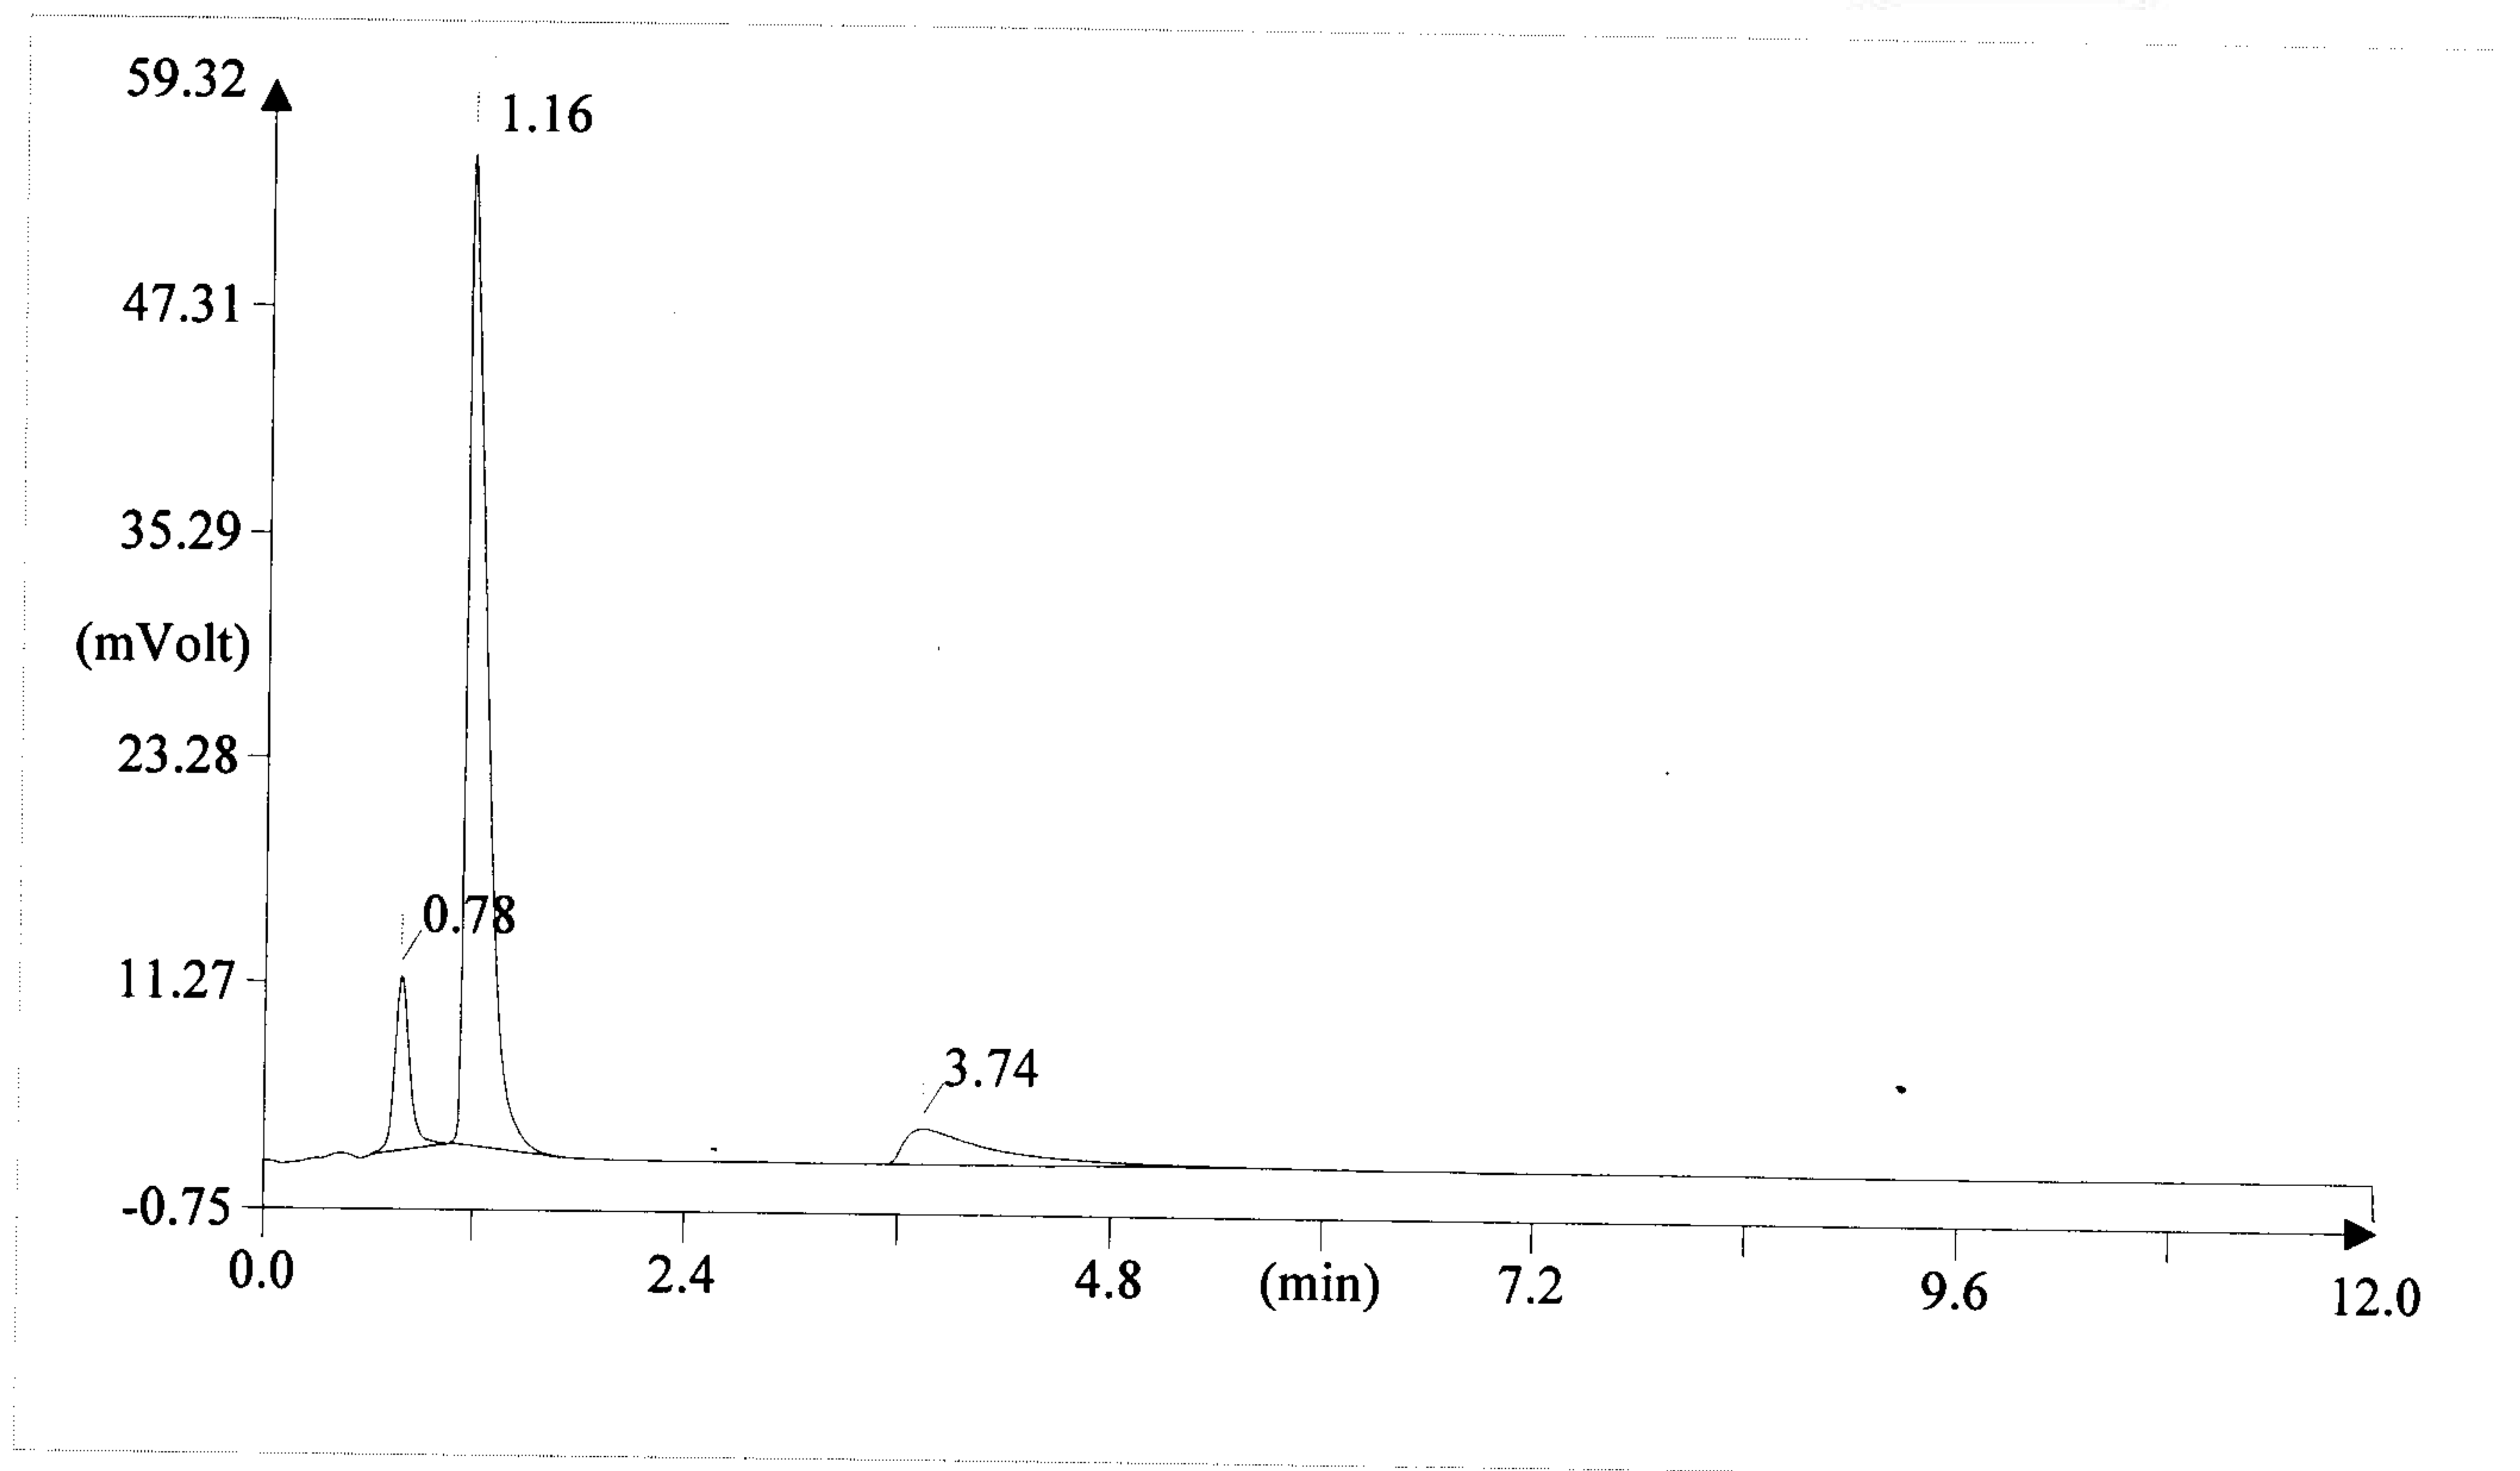

| Element Name | Element % | Ret. Time |
|--------------|-----------|-----------|
| Nitrogen     | 7. 88     | 0. 78     |
| Carbon       | 81. 65    | 1. 16     |
| Hydrogen     | 5. 76     | 3. 74     |

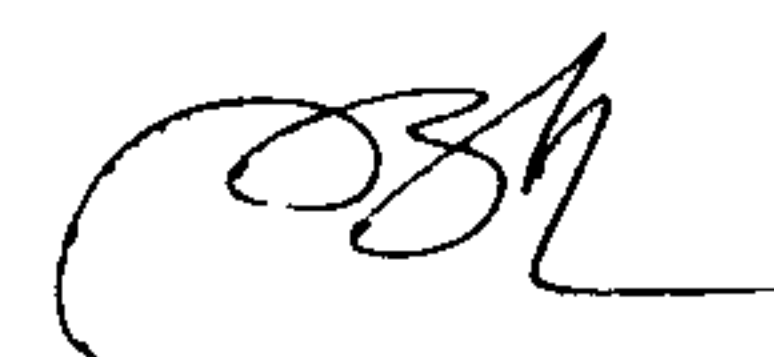



# FLASH EA 1112 SERIES CHN REPORT

## SCHOOL OF CHEMISTRY

## UNIVERSITY OF HYDERABAD

Method filename: E:\Program Files\Thermo Finnigan\Eager 300 for EA1112\DATA\Sys\_data\_ex  
Sample ID: MBC-11-77-T2 (# 64)  
Analysis type: UnkNown  
Chromatogram filename: UNK-27052011-24.dat  
Sample weight: 1.131

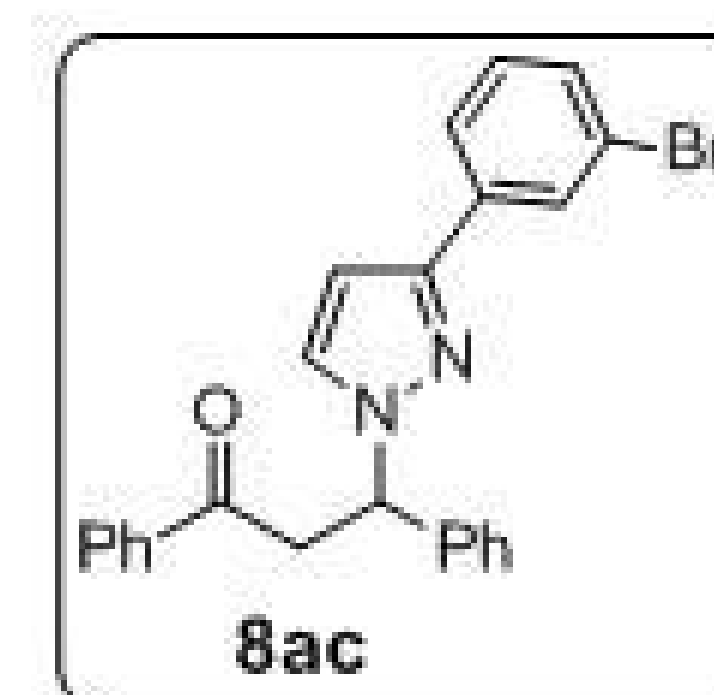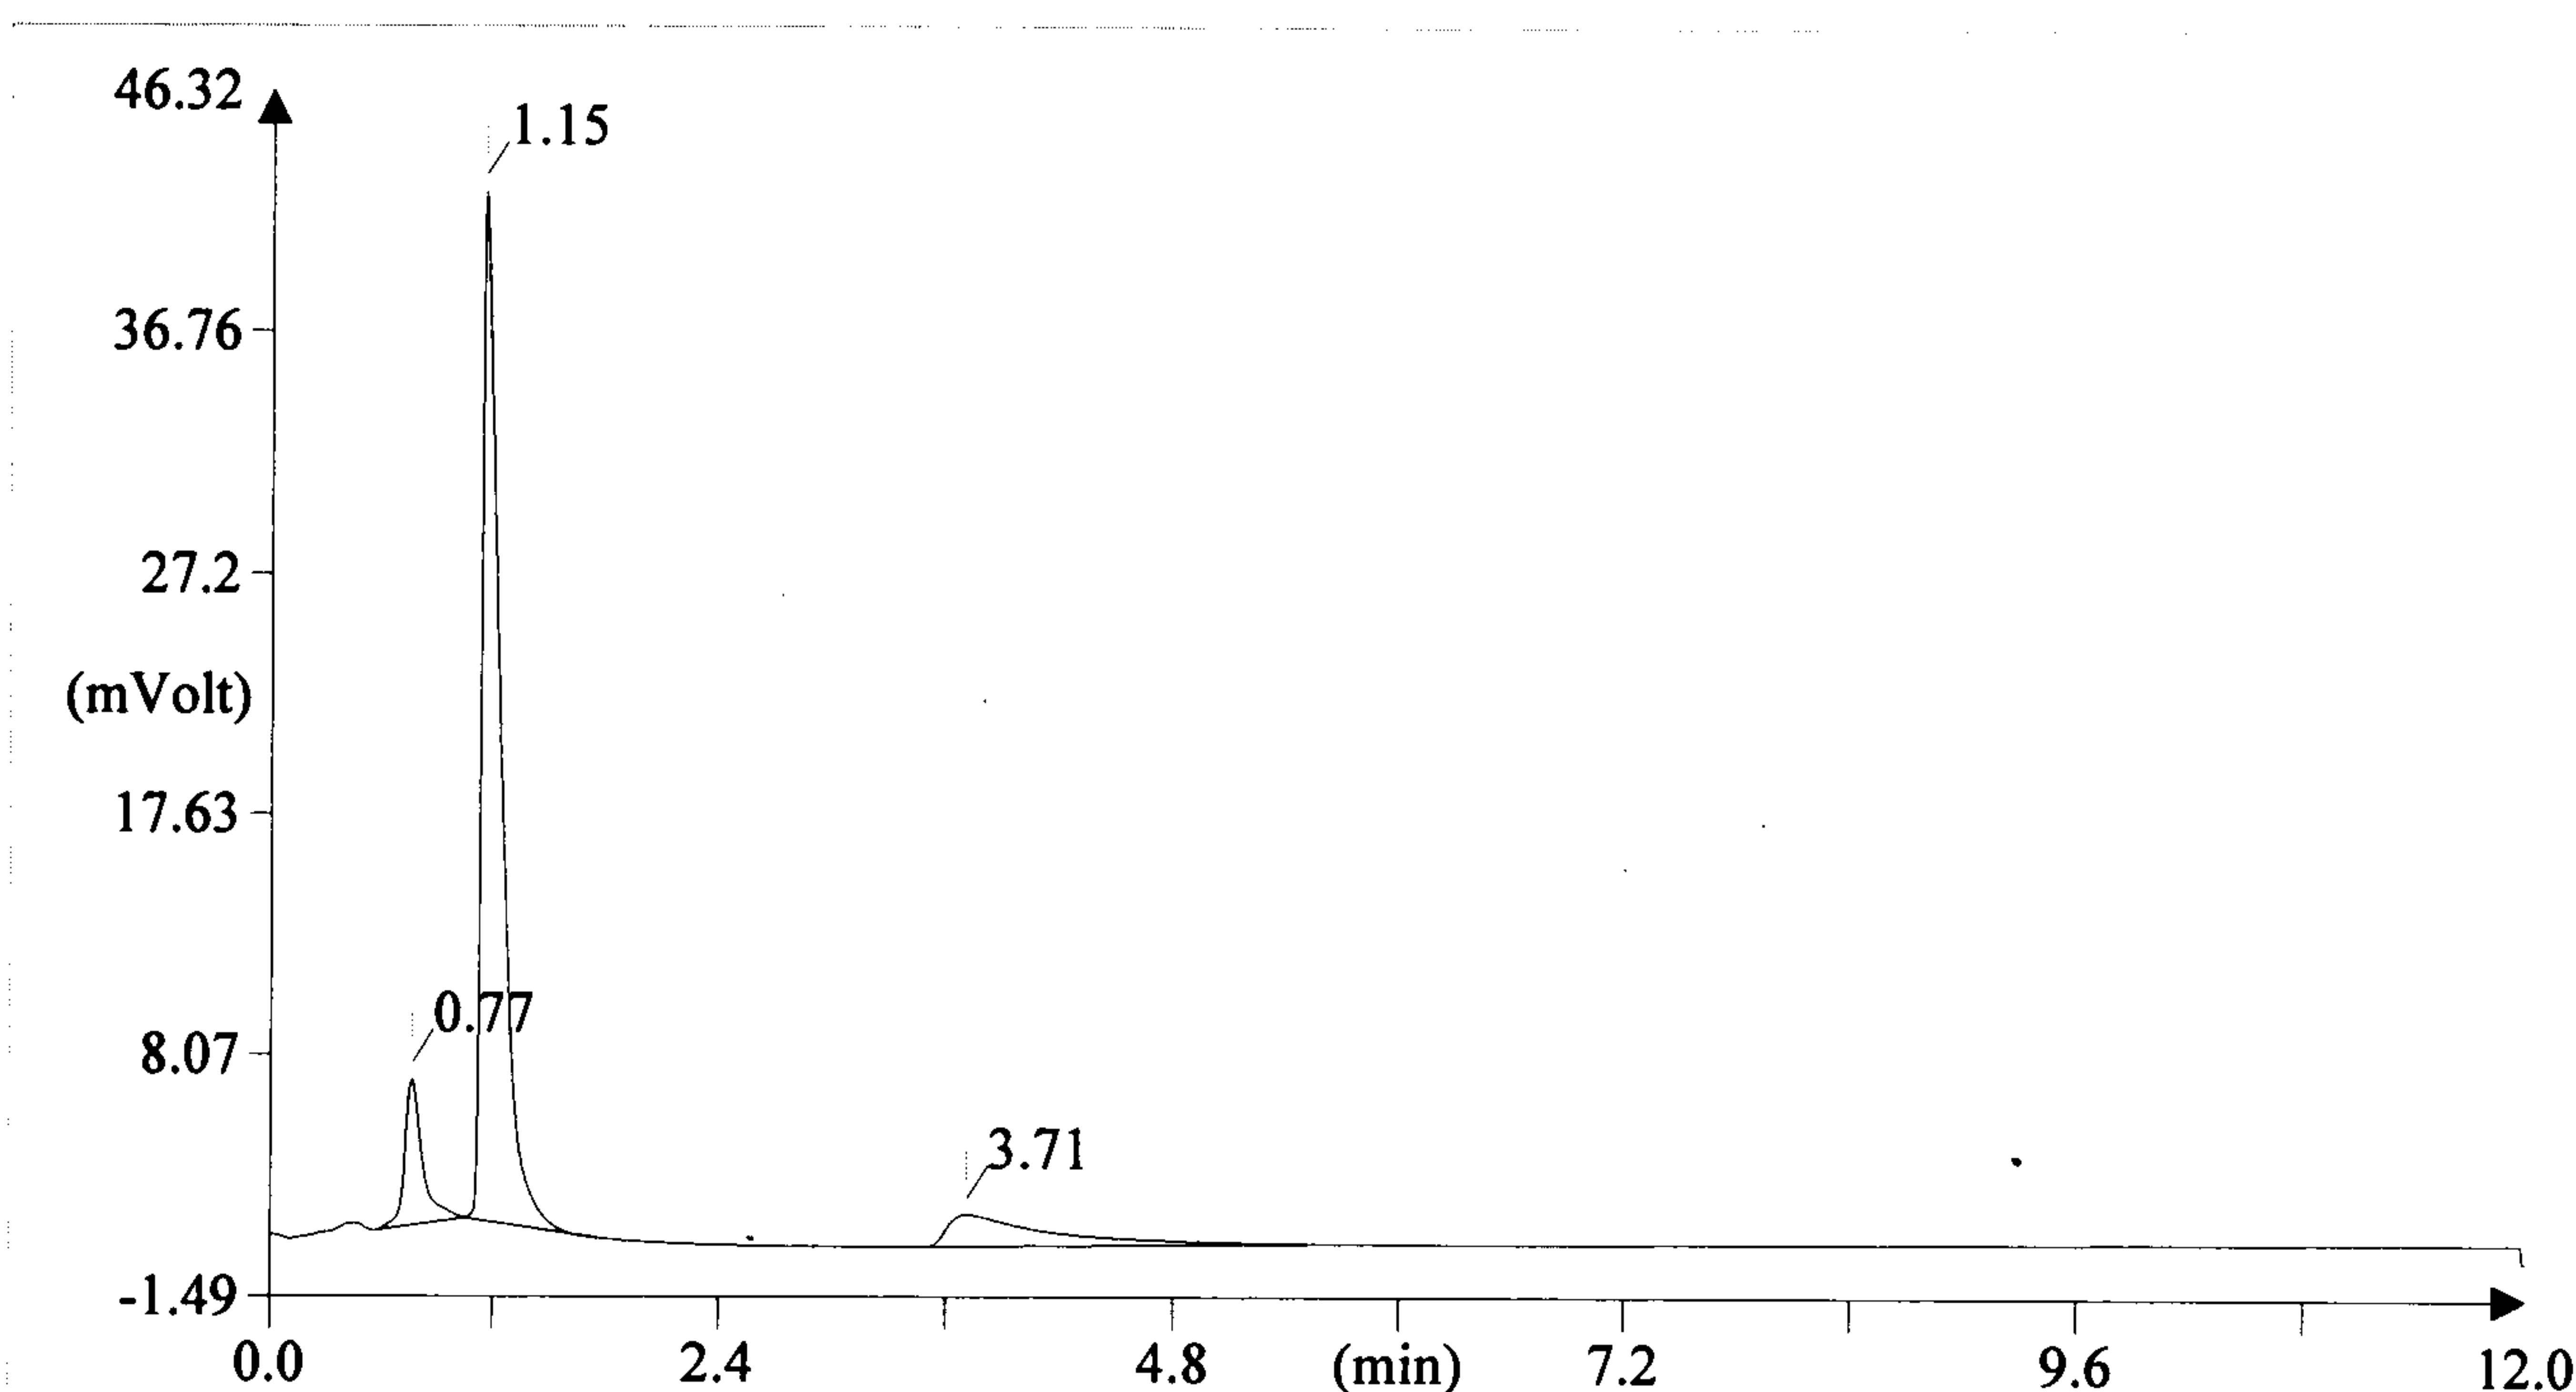

| Element Name | Element % | Ret. Time |
|--------------|-----------|-----------|
| Nitrogen     | 6.41      | 0.77      |
| Carbon       | 66.75     | 1.15      |
| Hydrogen     | 4.51      | 3.71      |

*(Handwritten signature)*

# FLASH EA 1112 SERIES CHN REPORT

## SCHOOL OF CHEMISTRY

## UNIVERSITY OF HYDERABAD

Method filename: E:\Program Files\Thermo Finnigan\Eager 300 for EA1112\DATA\Sys\_data\_ex  
 Sample ID: MBC-11-80-T2 (# 62)  
 Analysis type: UnkNown  
 Chromatogram filename: UNK-27052011-22.dat  
 Sample weight: 1.136

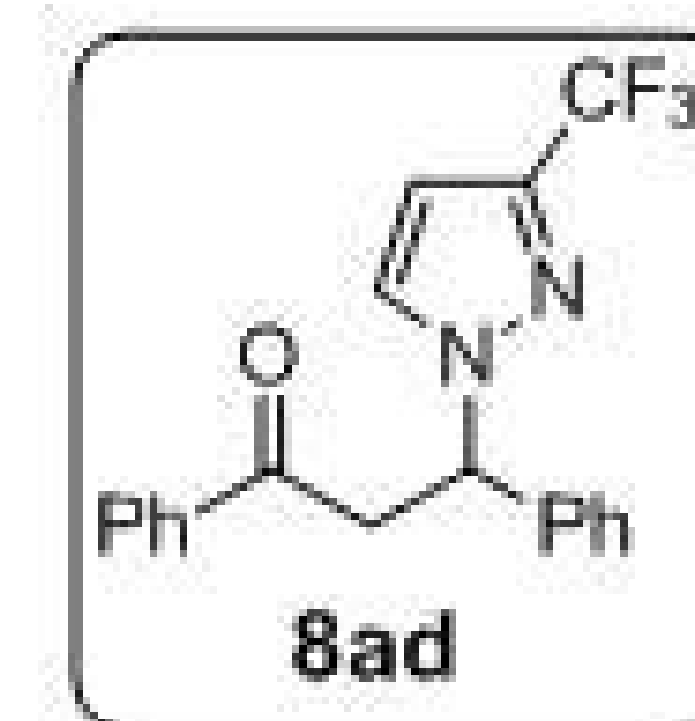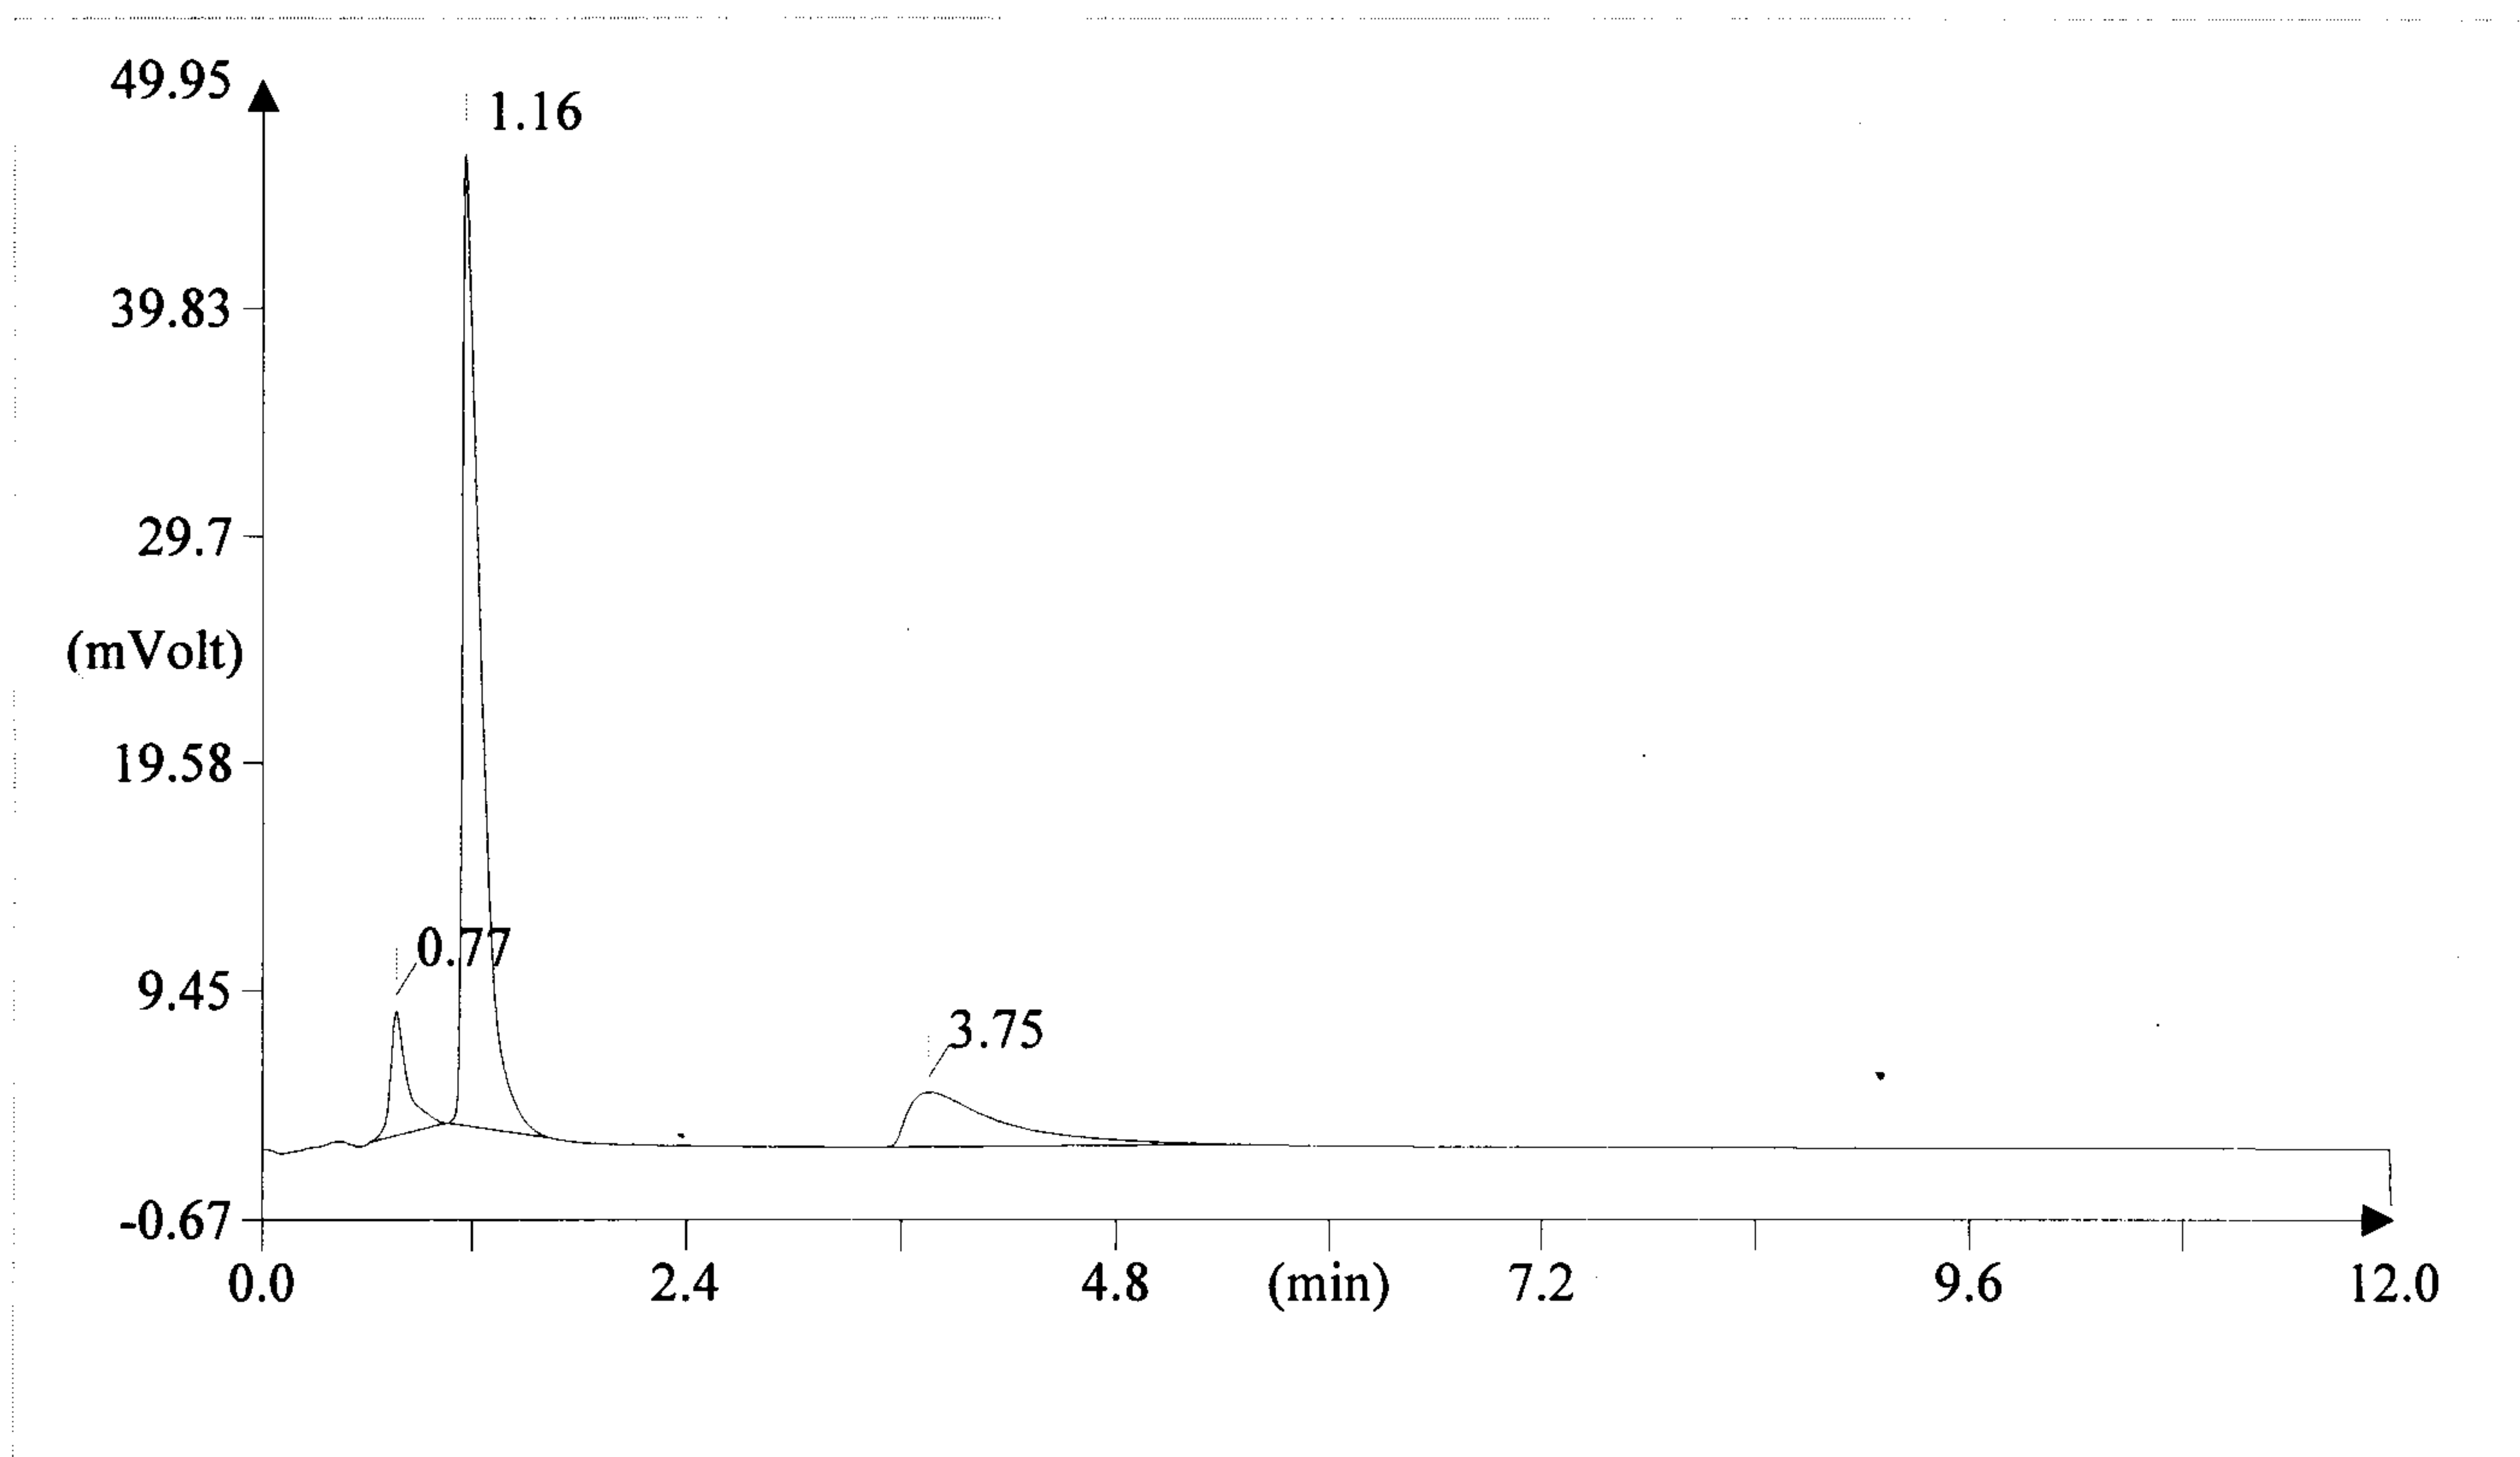

| Element Name | Element % | Ret. Time |
|--------------|-----------|-----------|
| Nitrogen     | 8. 21     | 0. 77     |
| Carbon       | 66. 15    | 1. 16     |
| Hydrogen     | 4. 46     | 3. 75     |

*(Signature)*

# FLASH EA 1112 SERIES CHN REPORT

## SCHOOL OF CHEMISTRY

## UNIVERSITY OF HYDERABAD

Method filename: C:\Program Files\Thermo Finnigan\Eager 300 for EA1112\DATA\Sys\_data\_ex  
 Sample ID: MBC-11-133-T3 (# 2)  
 Analysis type: UnkNown  
 Chromatogram filename: UNK-05122011-2.dat  
 Sample weight: 1.006

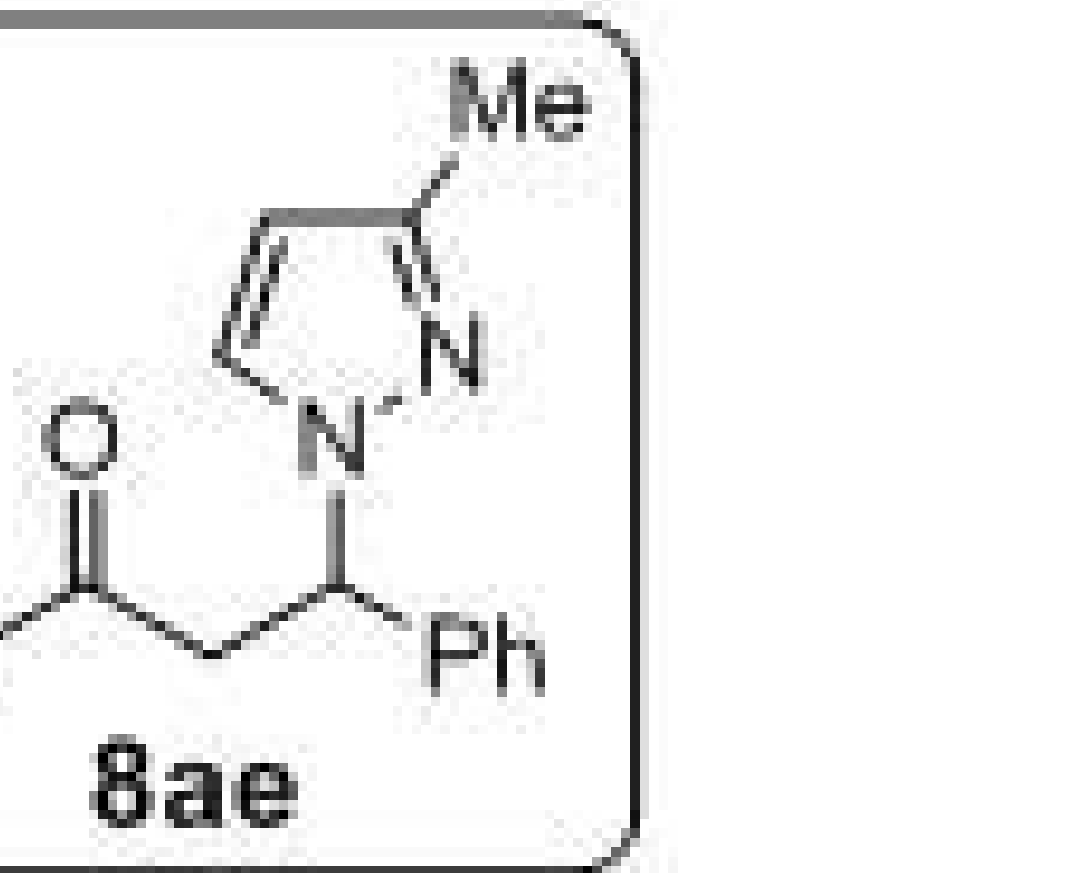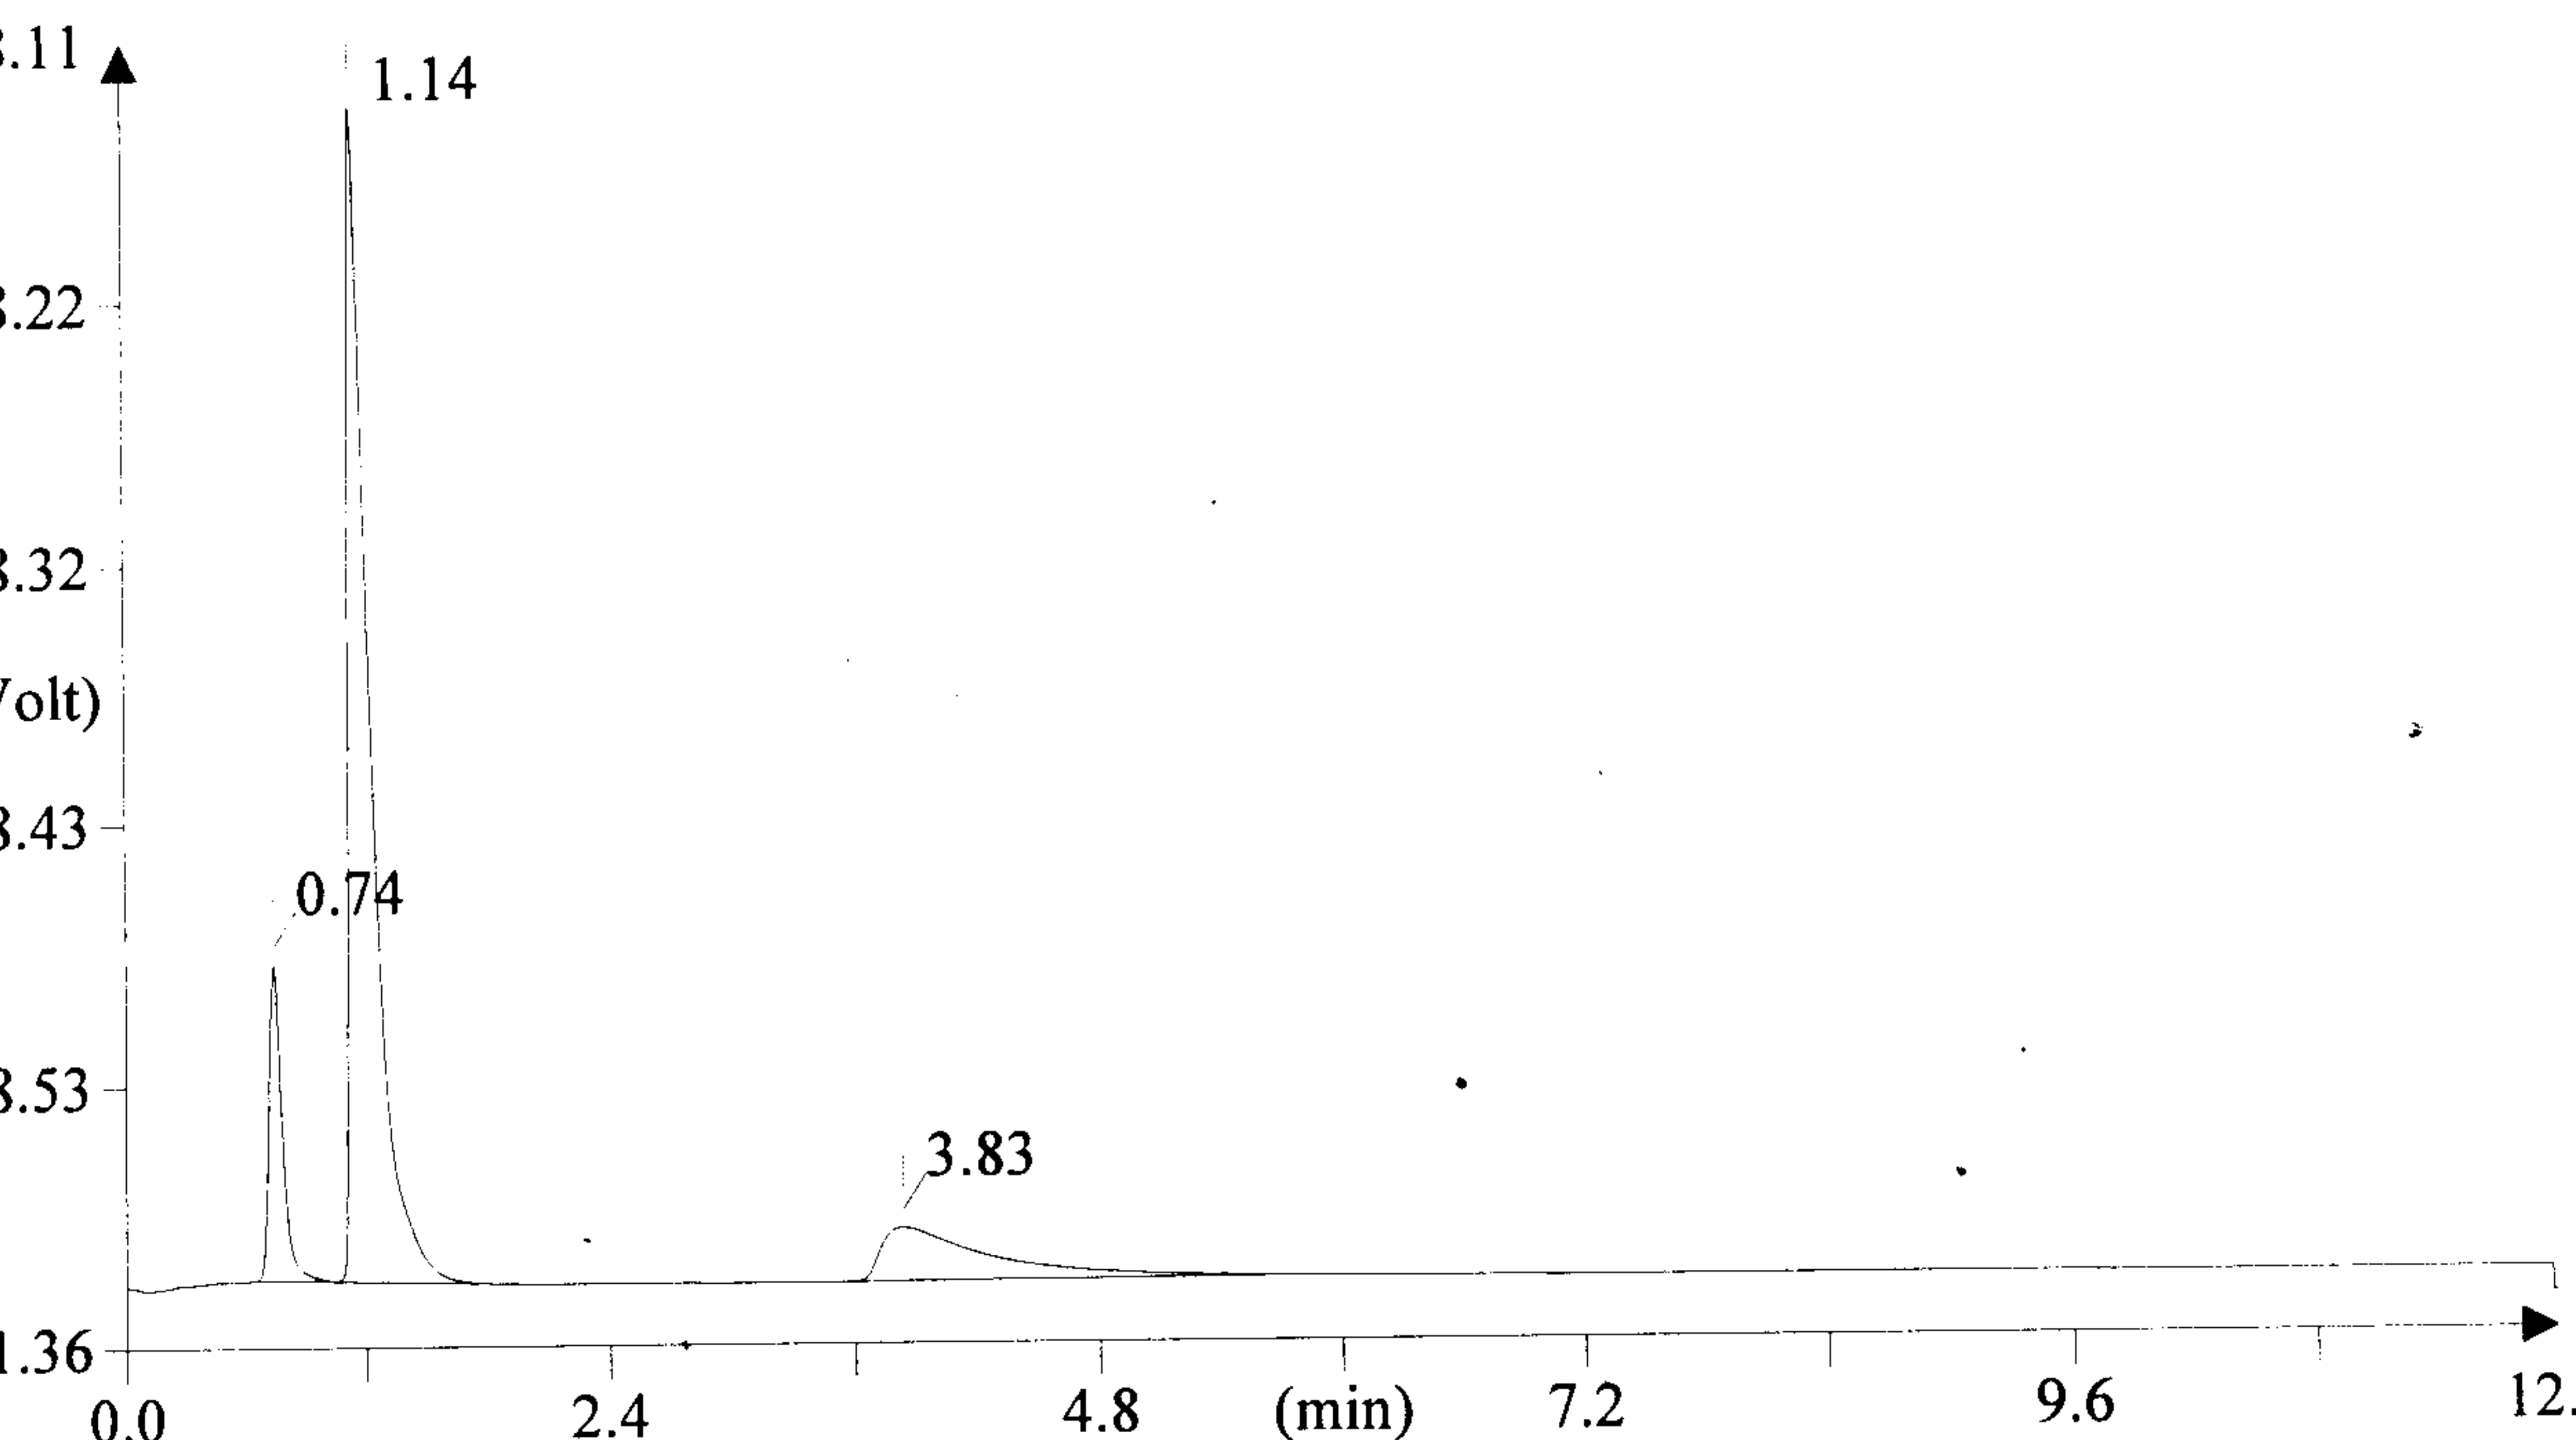

| Element Name | Element % | Ret. Time |
|--------------|-----------|-----------|
| Nitrogen     | 9. 58     | 0. 74     |
| Carbon       | 78. 45    | 1. 14     |
| Hydrogen     | 6. 31     | 3. 83     |

*(Signature)*



# FLASH EA 1112 SERIES CHN REPORT

## SCHOOL OF CHEMISTRY

## UNIVERSITY OF HYDERABAD

Method filename: I:\Program Files\Thermo Finnigan\Eager 300 for EA1112\DATA\Sys\_data\_exa  
 Sample ID: MBC-11-133-T2 (# 7)  
 Analysis type: UnkNown  
 Chromatogram filename: UNK-06042011-7.dat  
 Sample weight: .981

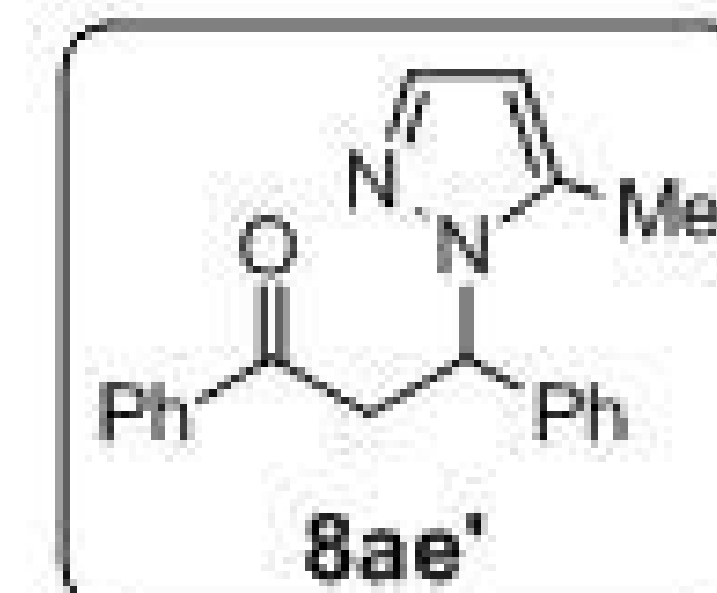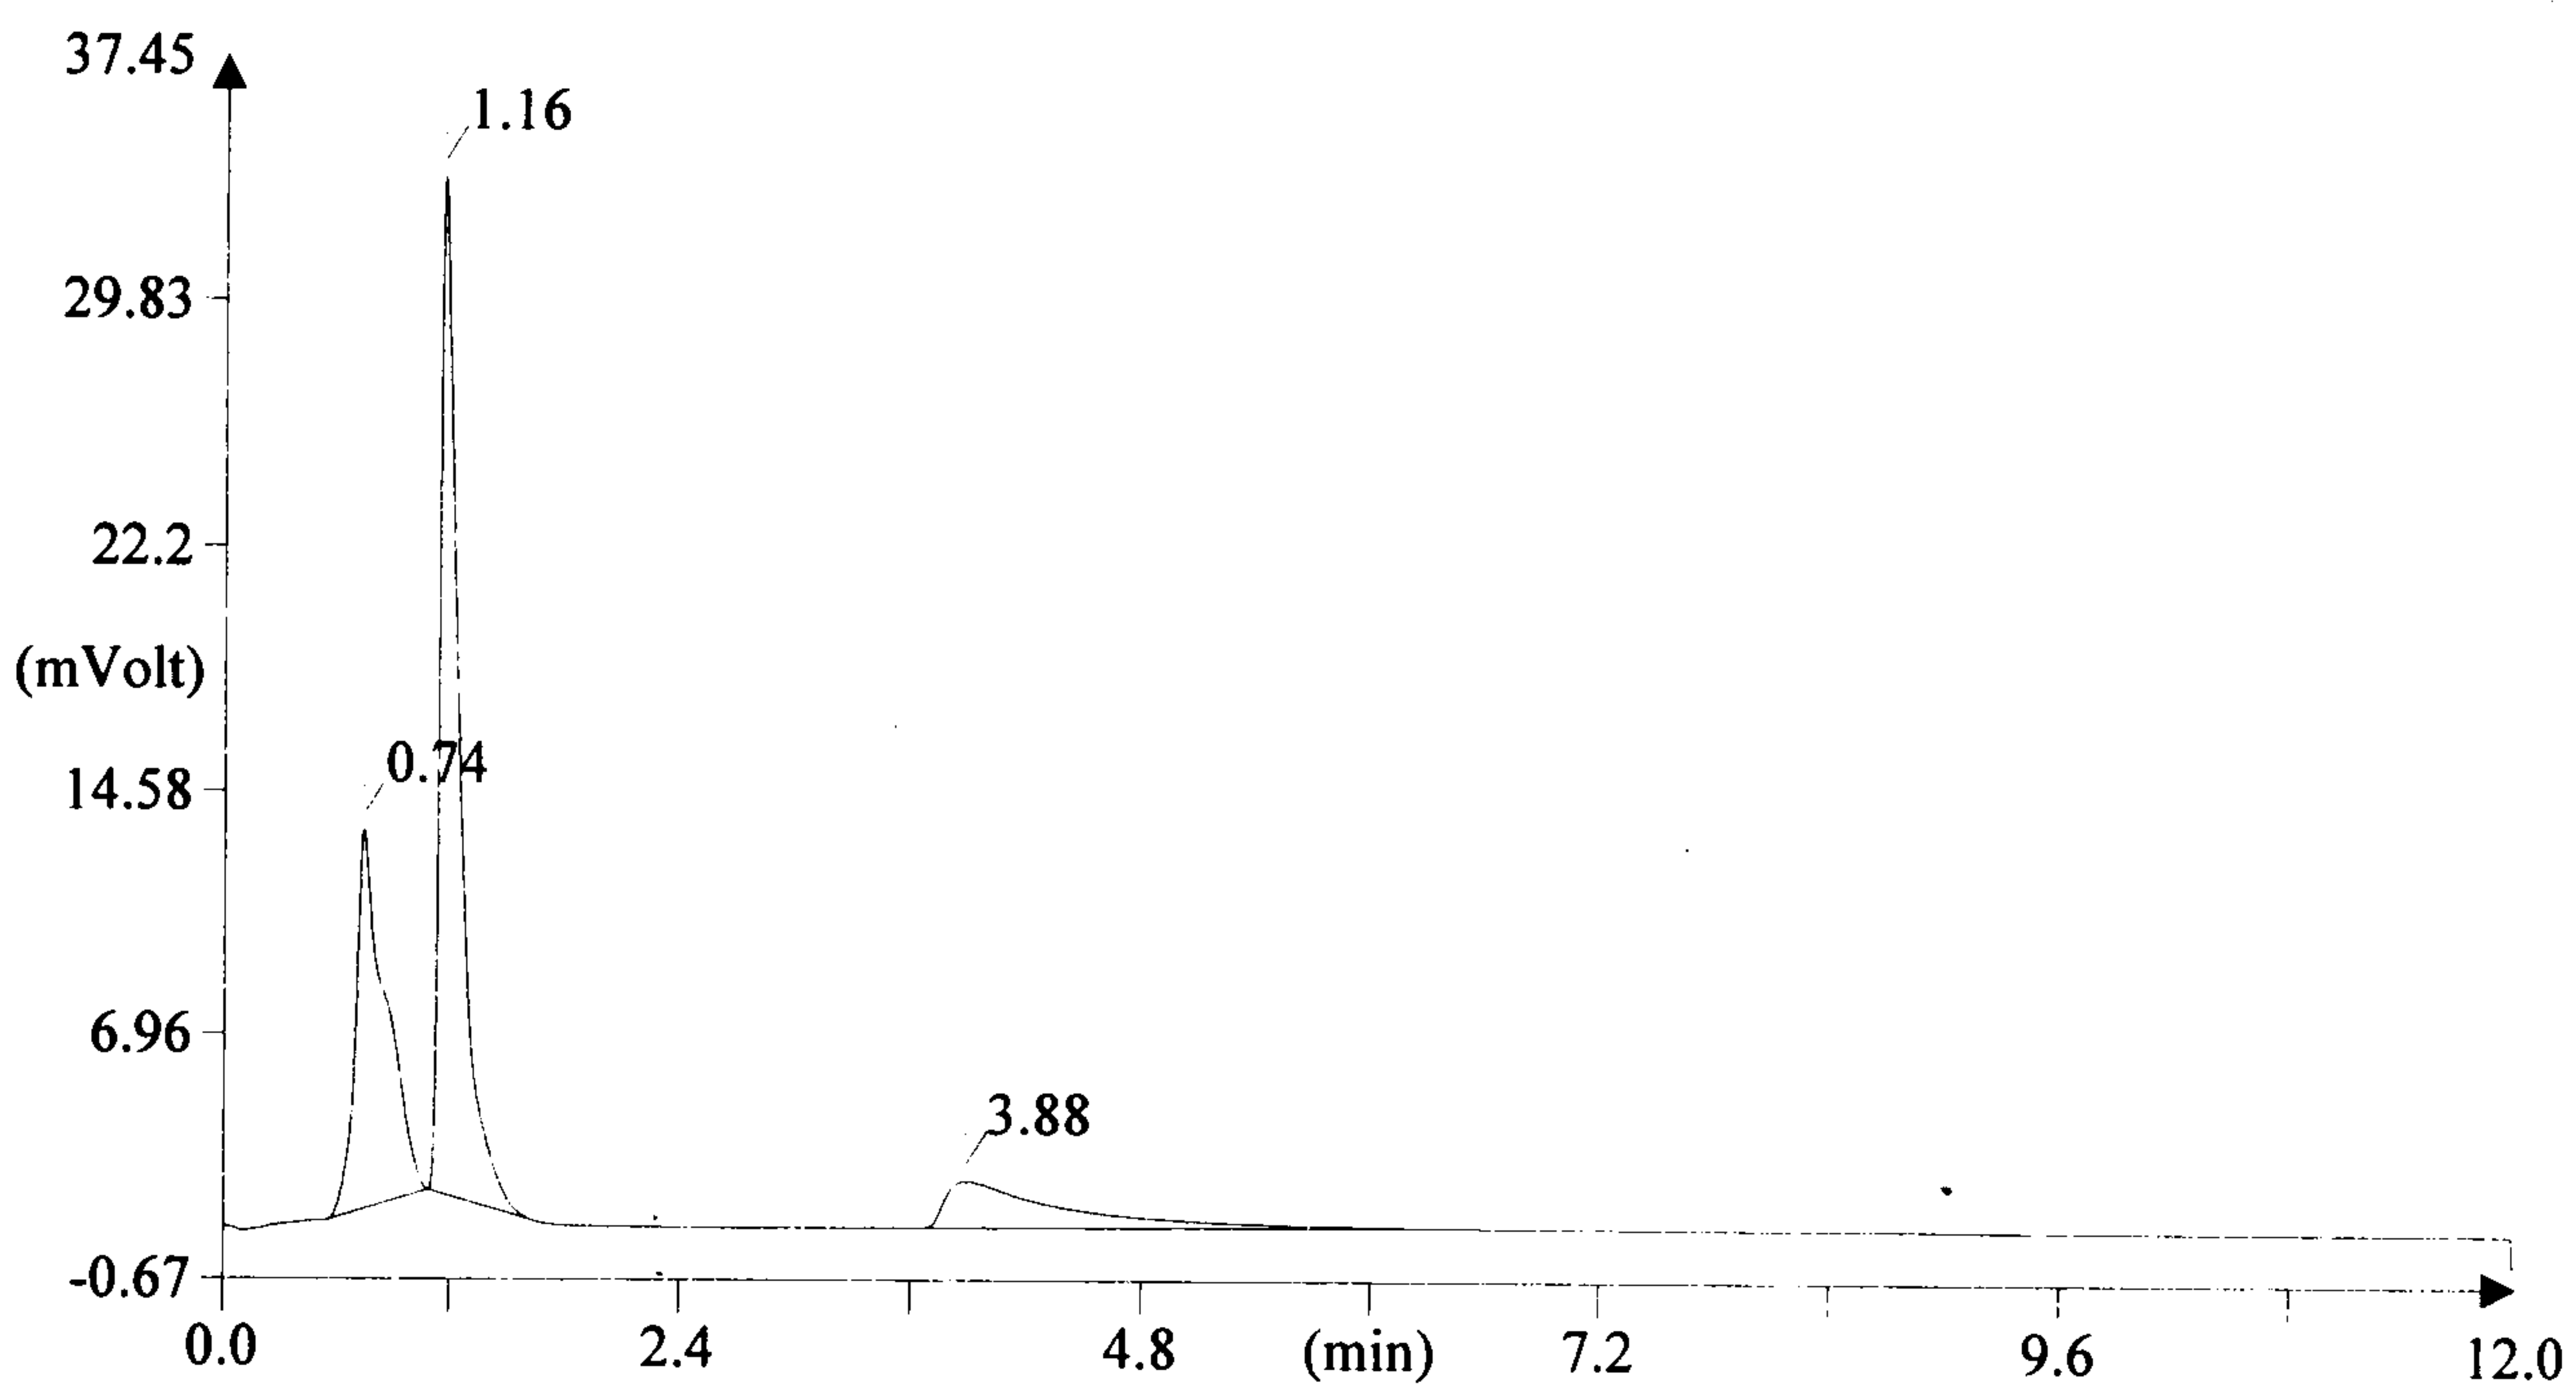

| Element Name | Element % | Ret. Time |
|--------------|-----------|-----------|
| Nitrogen     | 9.76      | 0.74      |
| Carbon       | 78.49     | 1.16      |
| Hydrogen     | 6.21      | 3.88      |

*Signature*



# FLASH EA 1112 SERIES CHN REPORT

## SCHOOL OF CHEMISTRY

## UNIVERSITY OF HYDERABAD

Method filename:

Sample ID:

Analysis type:

Chromatogram filename:

Sample weight:

E:\Program Files\Thermo Finnigan\Eager 300 for EA1112\DATA\Sys\_data\_ex  
MBC-11-78-T2 (# 61)

UnkNown

UNK-27052011-21.dat

1.118

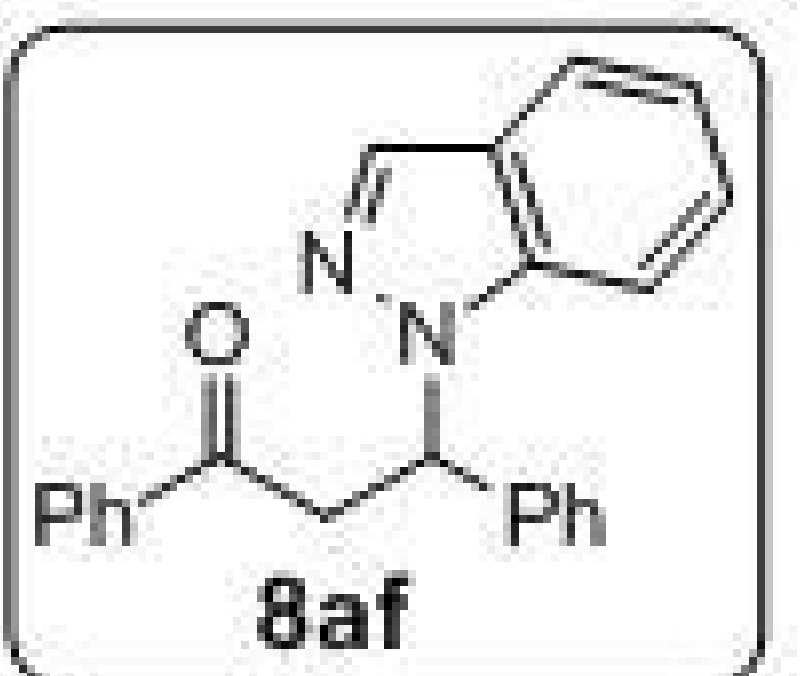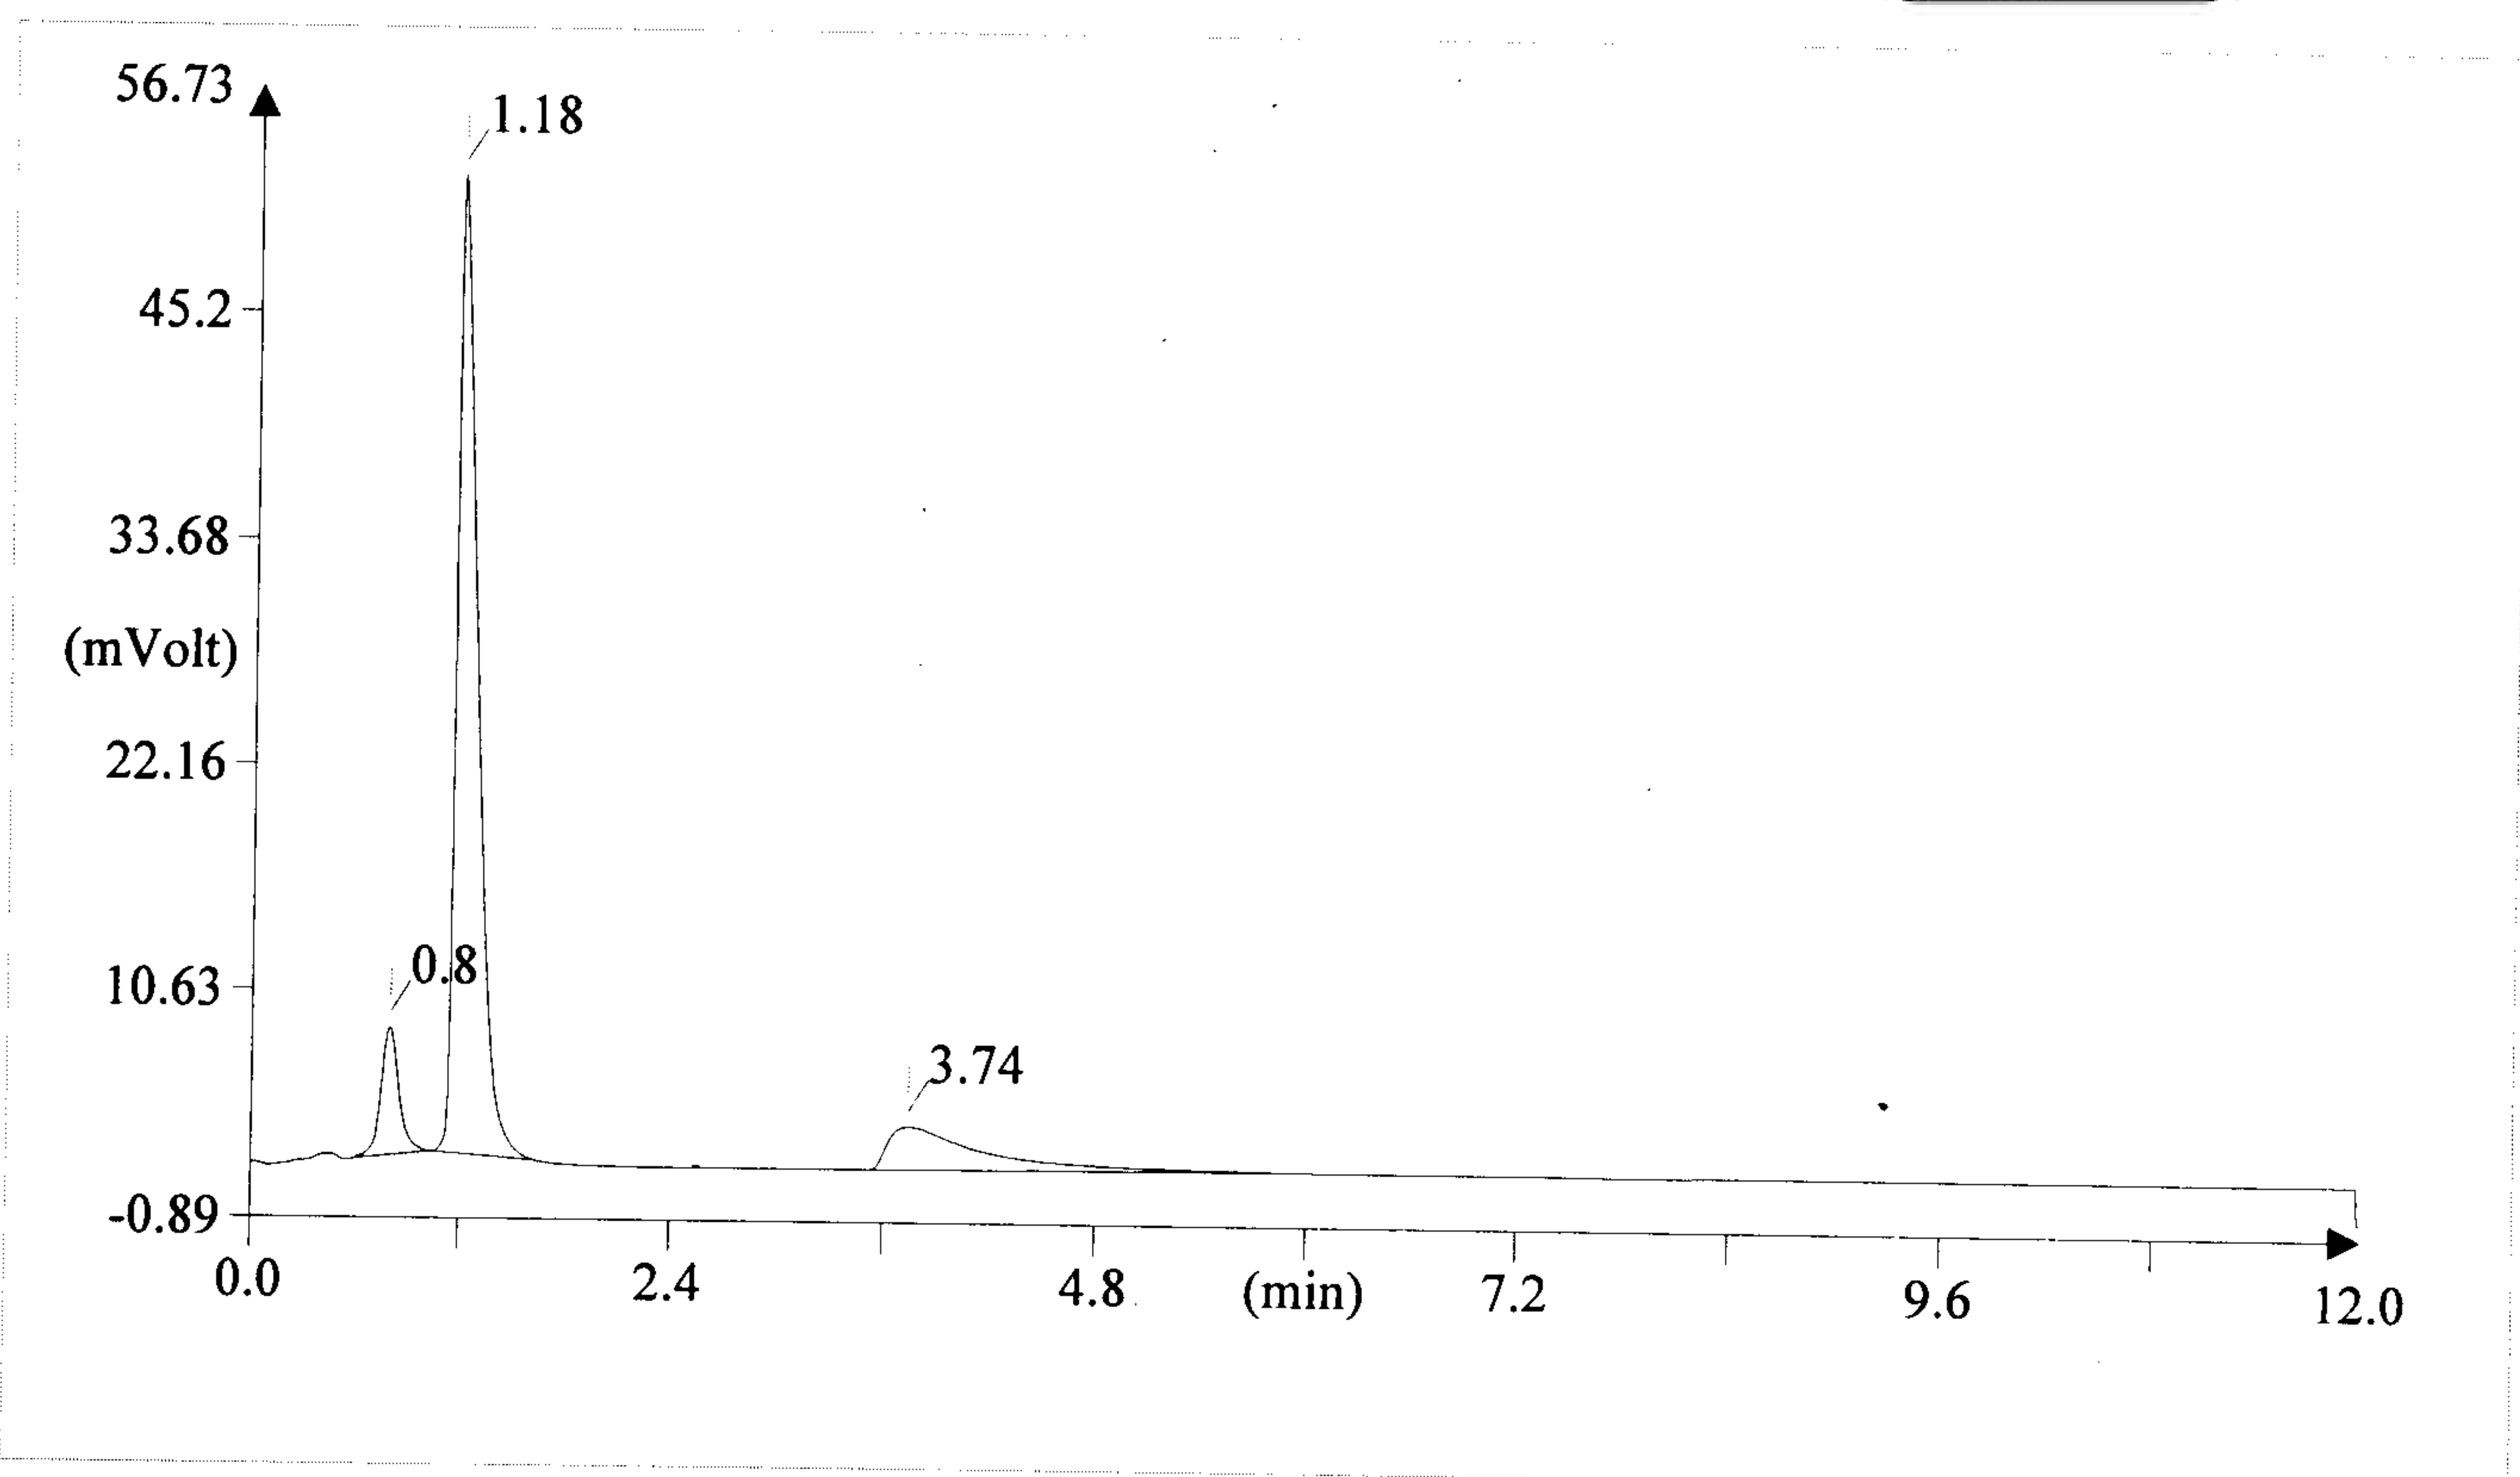

| Element Name | Element % | Ret. Time |
|--------------|-----------|-----------|
| Nitrogen     | 8.65      | 0.80      |
| Carbon       | 80.85     | 1.18      |
| Hydrogen     | 5.51      | 3.74      |

*CSH*

# FLASH EA 1112 SERIES CHN REPORT

## SCHOOL OF CHEMISTRY

## UNIVERSITY OF HYDERABAD

Method filename: E:\Program Files\Thermo Finnigan\Eager 300 for EA1112\DATA\Sys\_data\_ex  
Sample ID: MBC-12-6 (# 184)  
Analysis type: UnkNown  
Chromatogram filename: UNK-22082011-14.dat  
Sample weight: 1.132

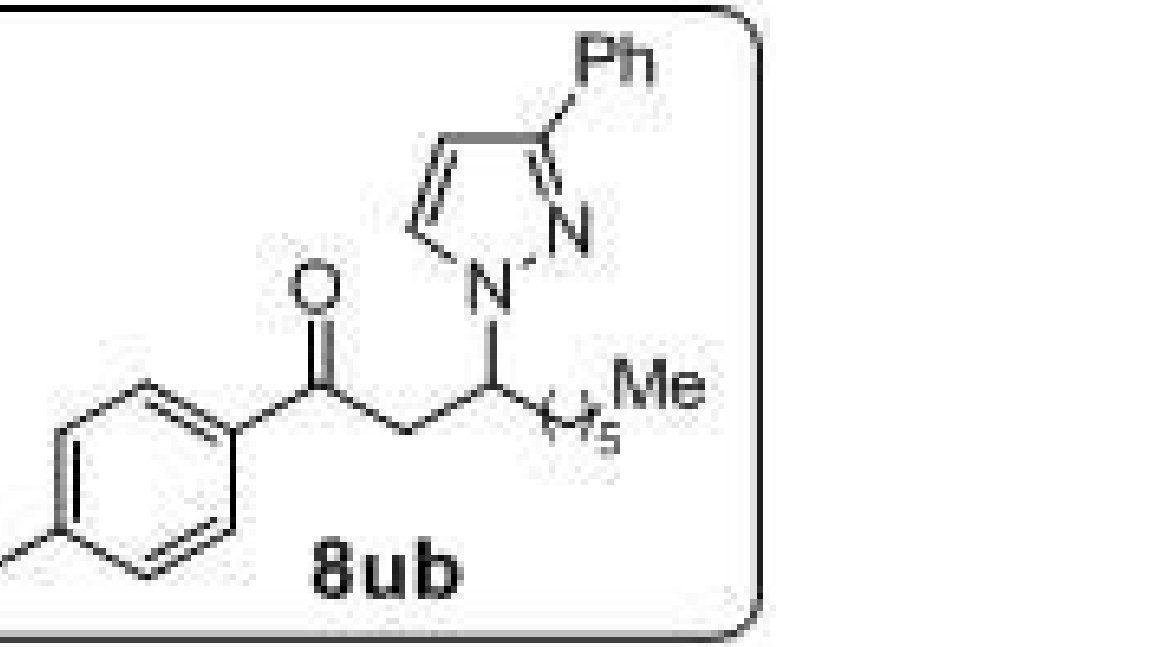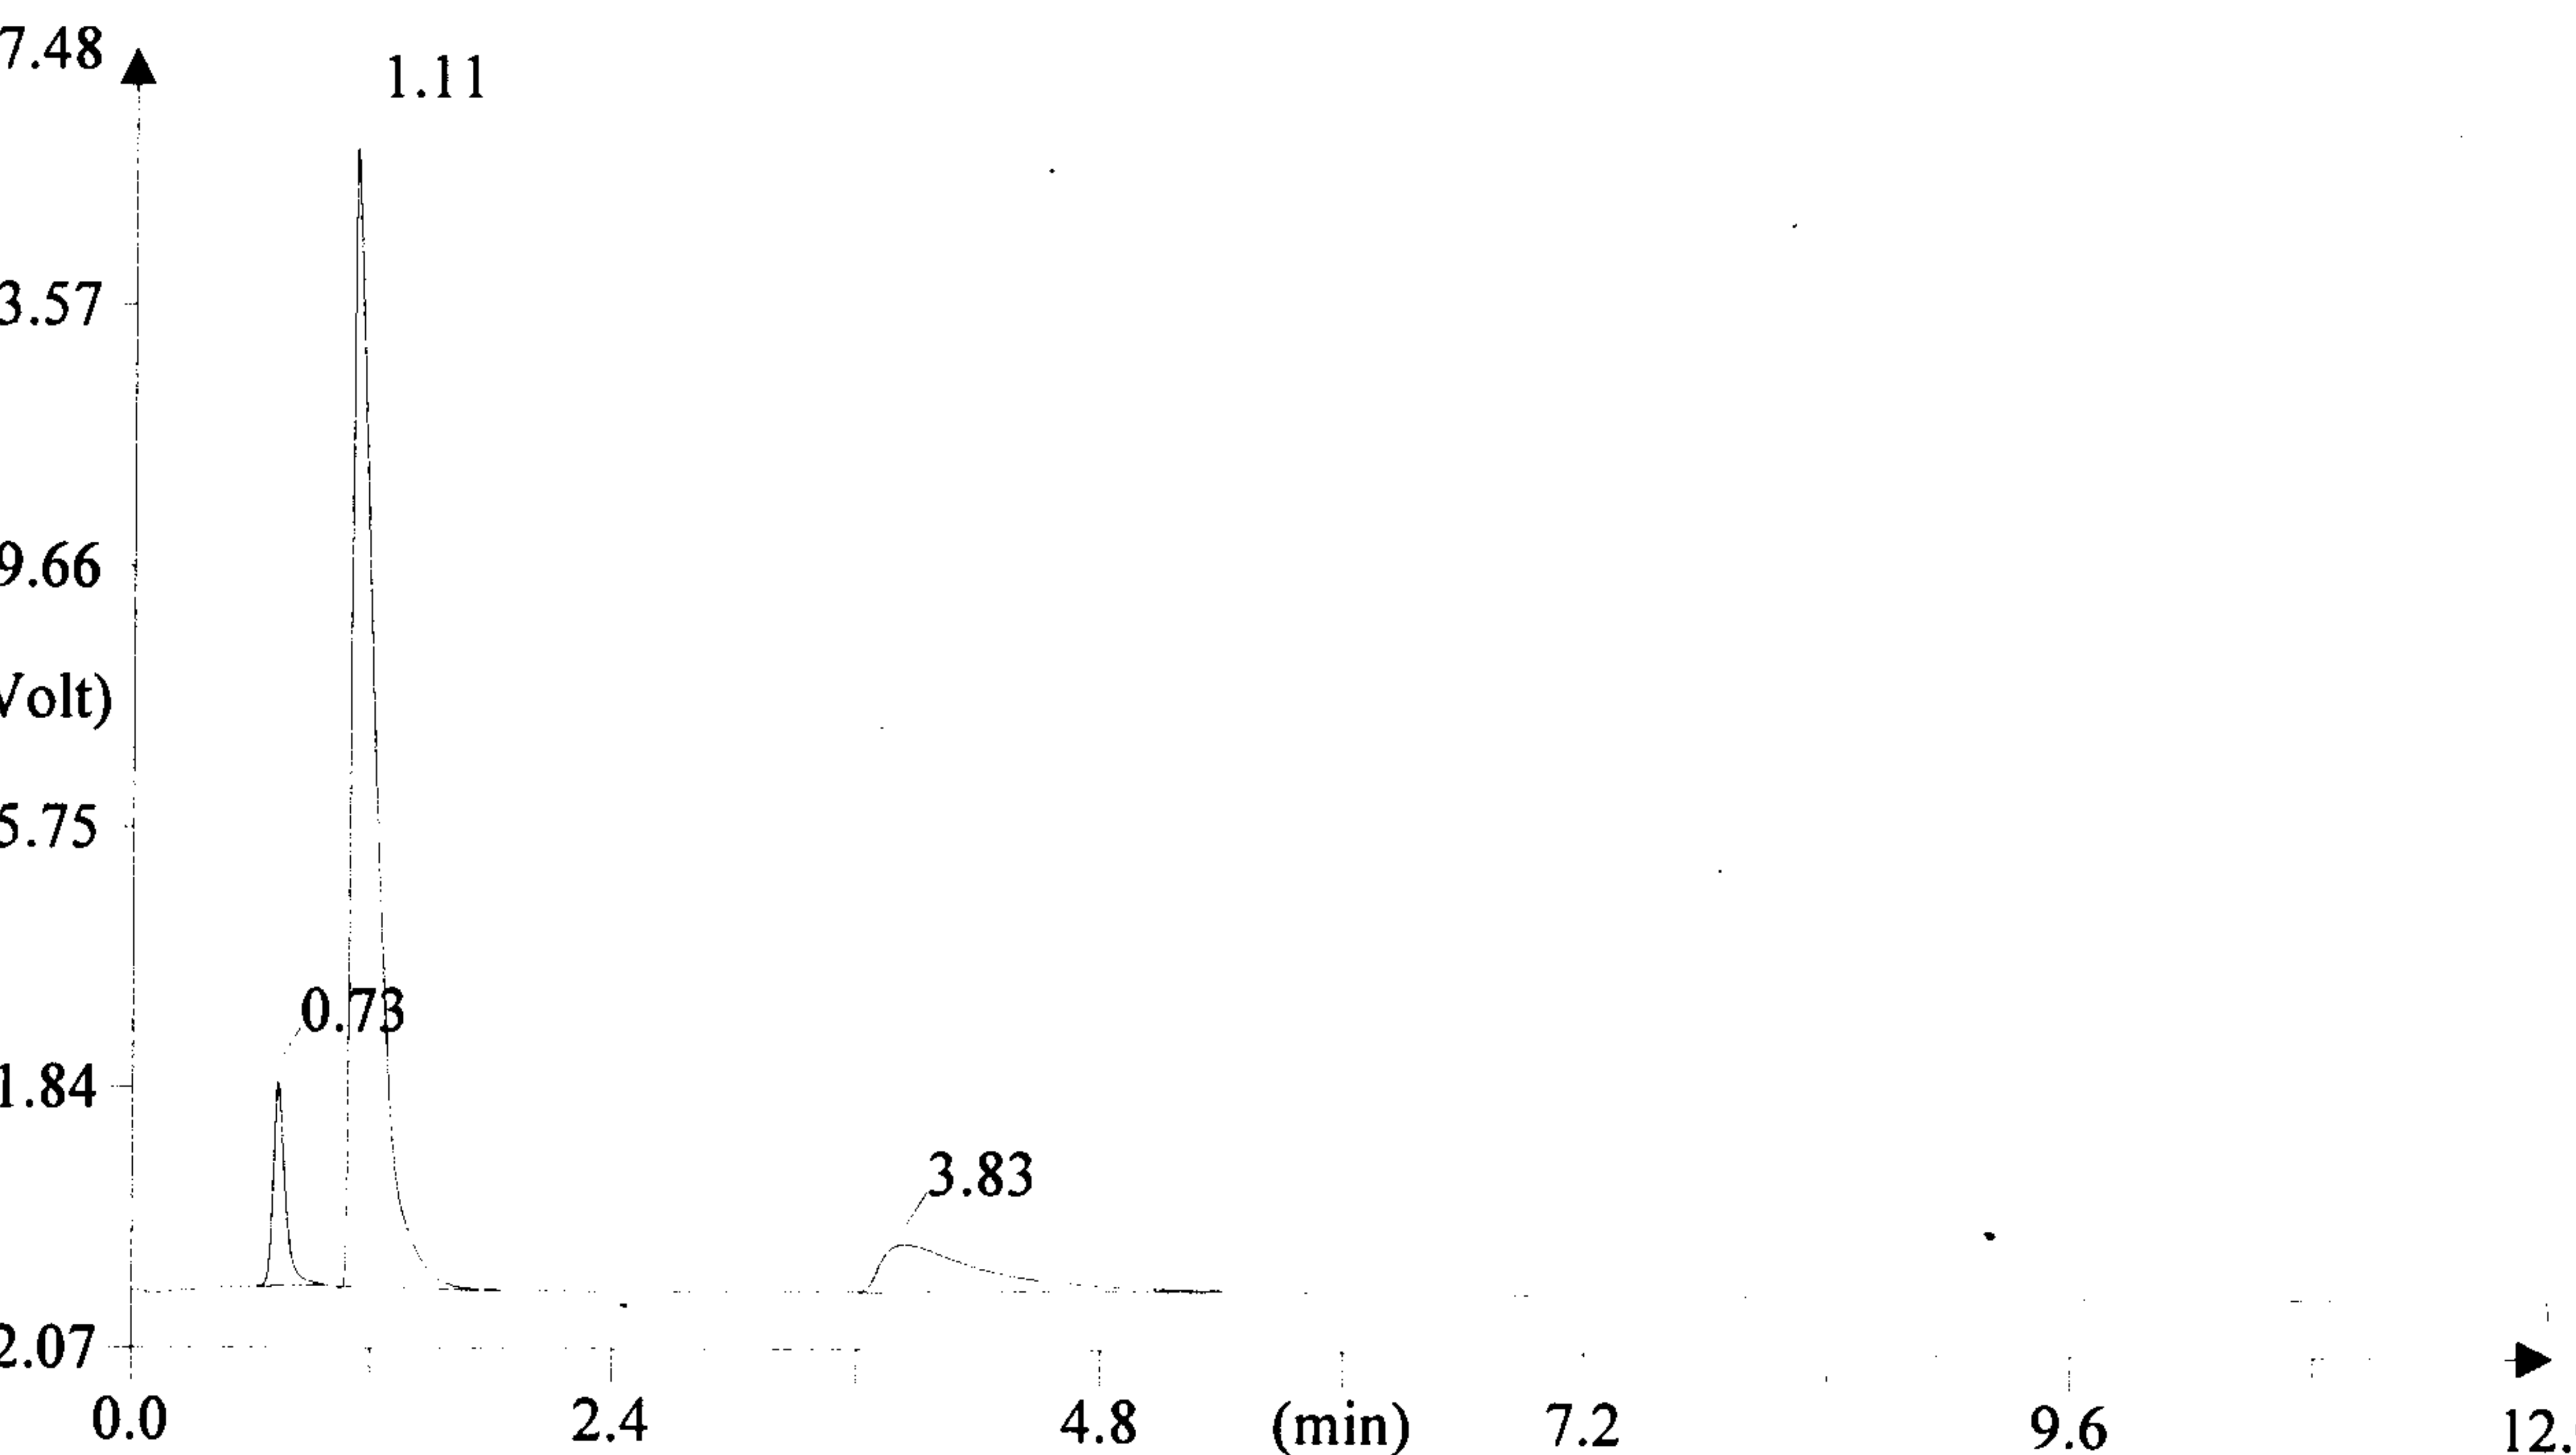

| Element Name | Element % | Ret. Time |
|--------------|-----------|-----------|
| Nitrogen     | 7. 56     | 0. 73     |
| Carbon       | 80. 06    | 1. 11     |
| Hydrogen     | 8. 12     | 3. 83     |

*Signature*

# FLASH EA 1112 SERIES CHN REPORT

## SCHOOL OF CHEMISTRY

## UNIVERSITY OF HYDERABAD

Method filename: E:\Program Files\Thermo Finnigan\Eager 300 for EA1112\DATA\Sys\_data\_ex  
Sample ID: MBC-12-11 (# 173)  
Analysis type: UnkNown  
Chromatogram filename: UNK-22082011-3.dat  
Sample weight: 1.143

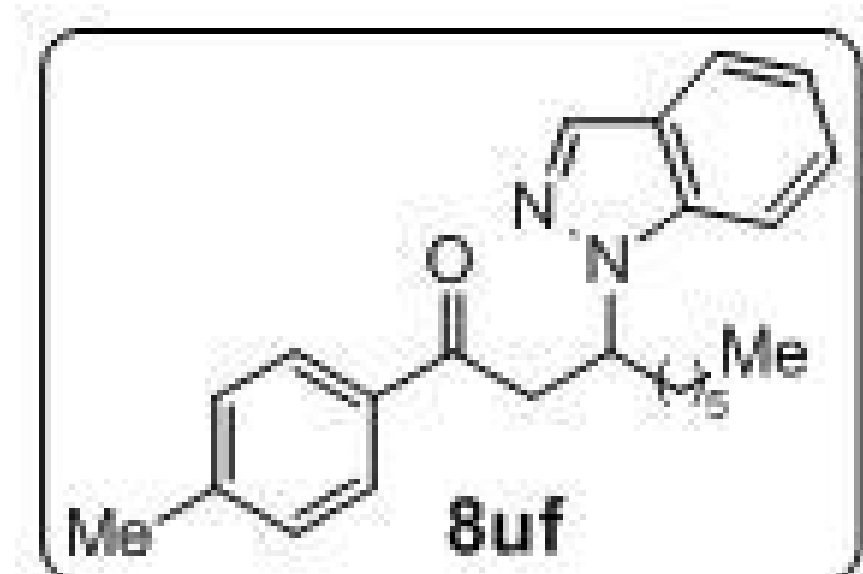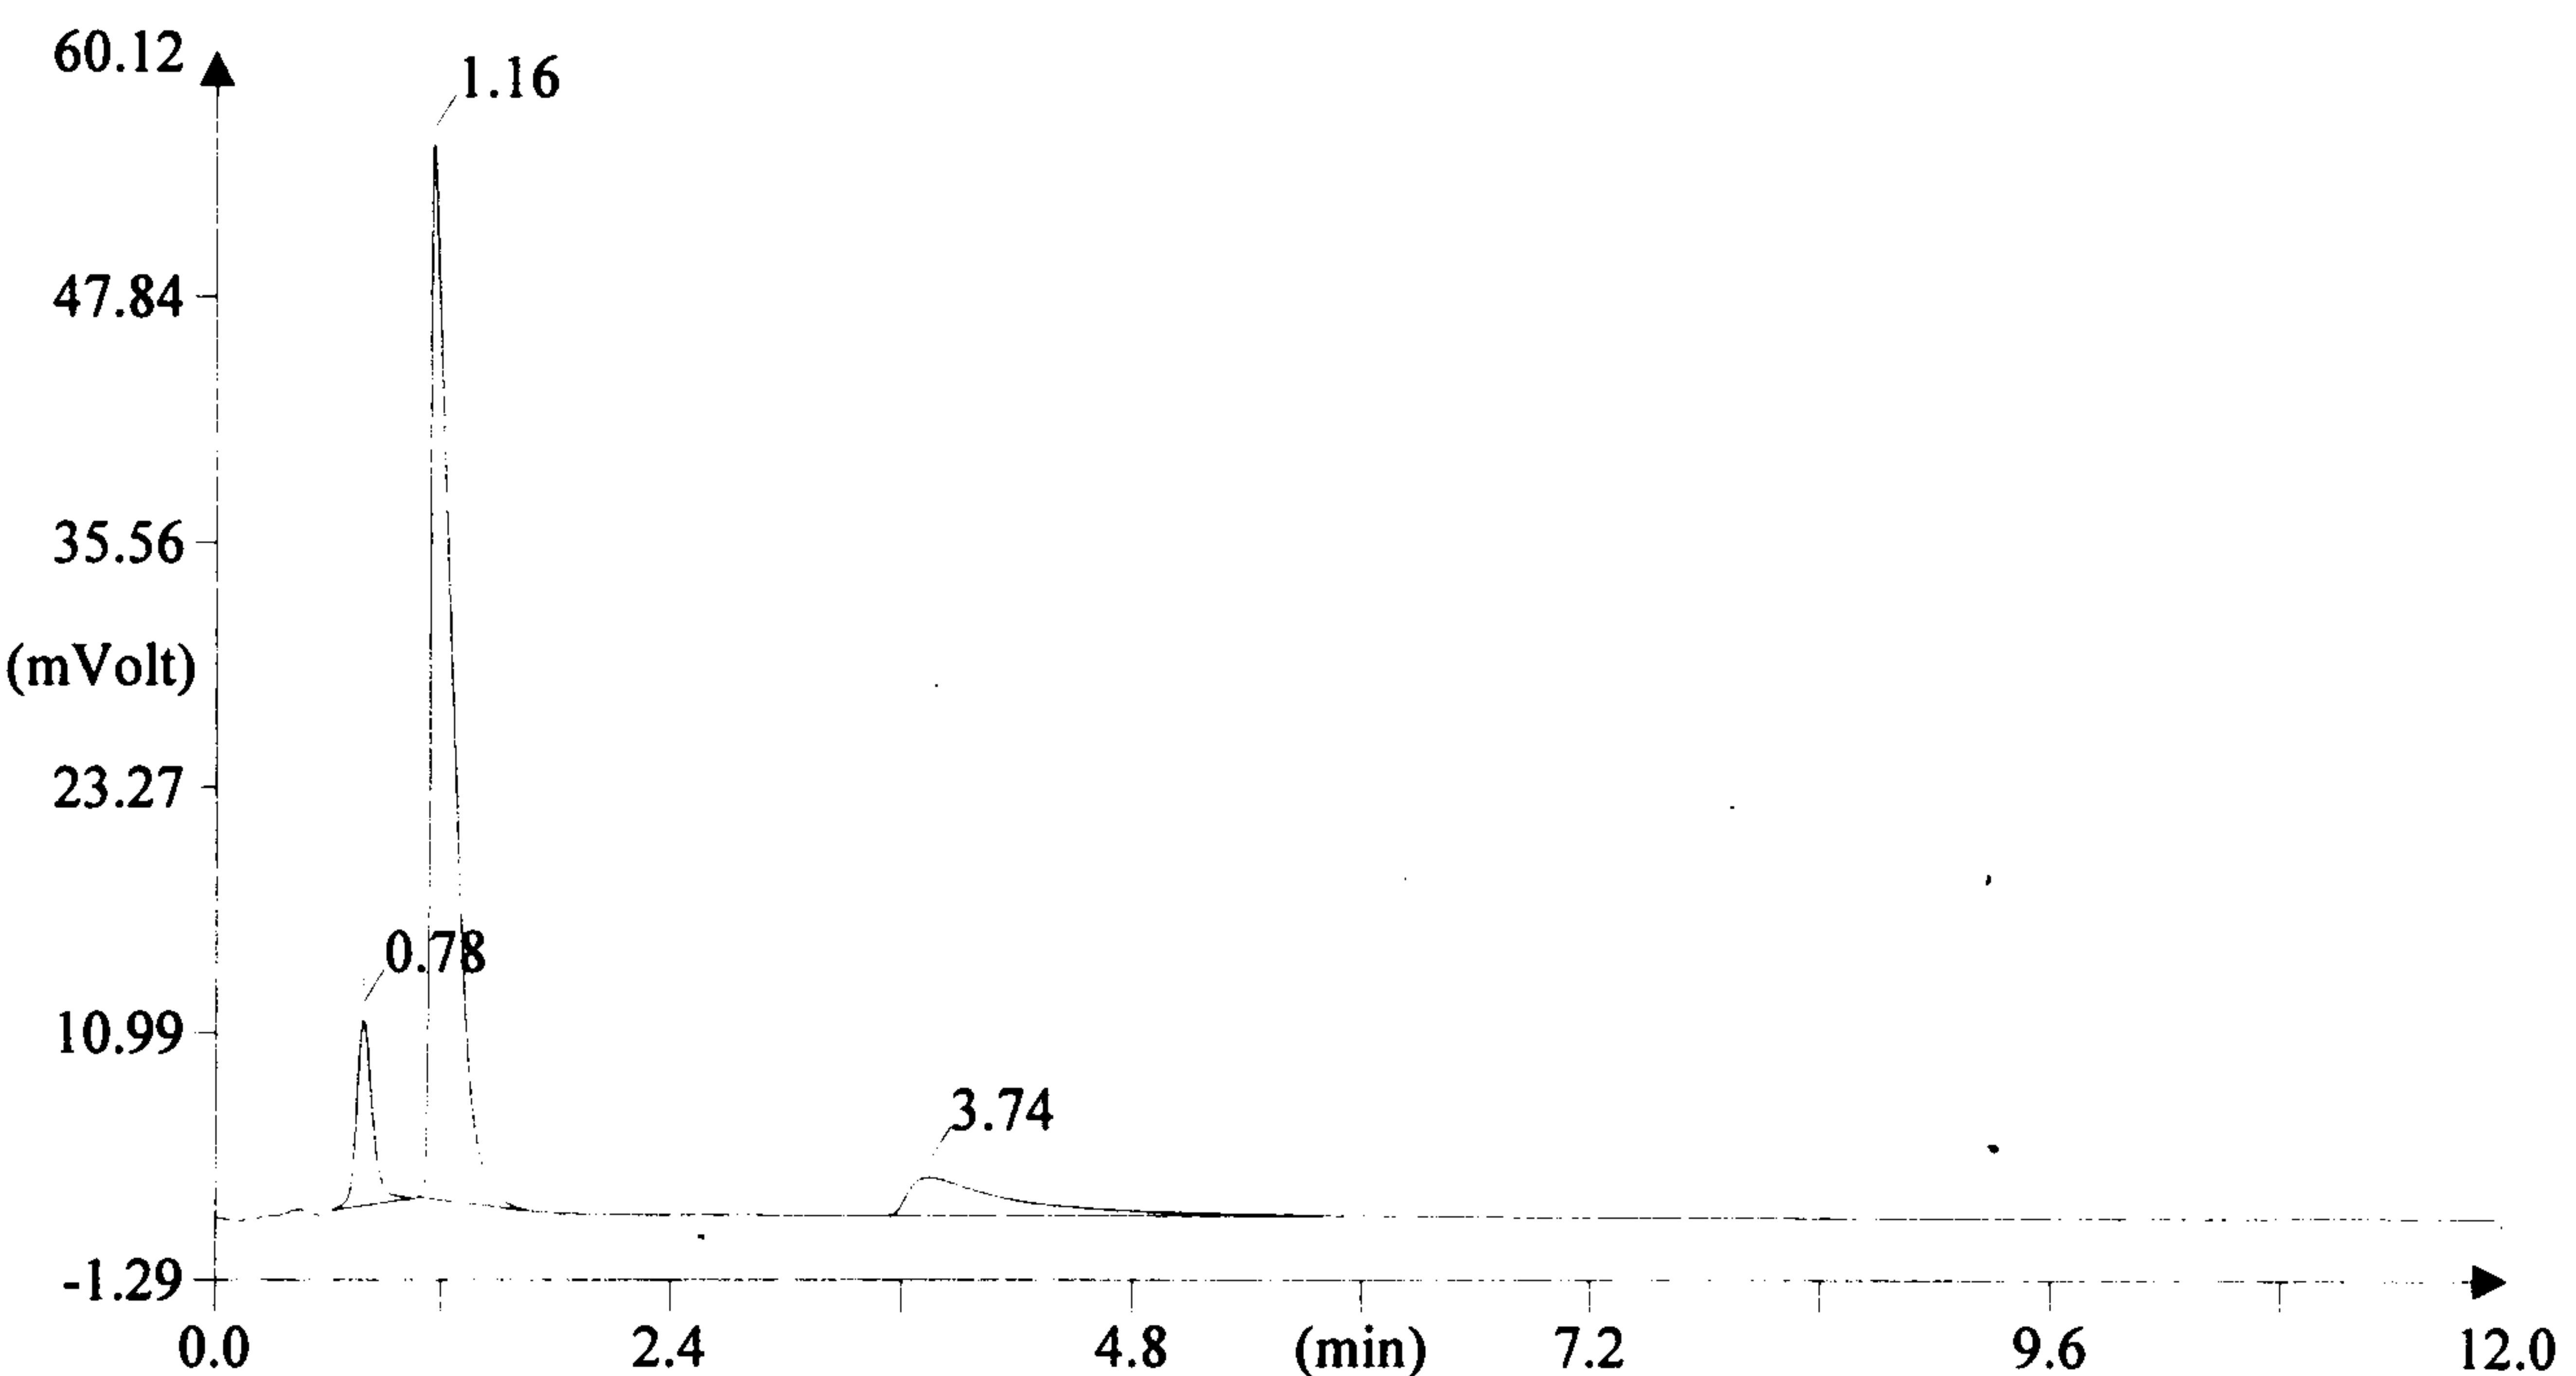

| Element Name | Element % | Ret. Time |
|--------------|-----------|-----------|
| Nitrogen     | 8. 12     | 0. 78     |
| Carbon       | 79. 45    | 1. 16     |
| Hydrogen     | 8. 06     | 3. 74     |

*Signature*

# FLASH EA 1112 SERIES CHN REPORT

## SCHOOL OF CHEMISTRY

## UNIVERSITY OF HYDERABAD

Method filename: I:\Program Files\Thermo Finnigan\Eager 300 for EA1112\DATA\Sys\_data\_exa  
 Sample ID: MBC-11-49-T2 (# 17)  
 Analysis type: UnkNown  
 Chromatogram filename: UNK-06042011-17.dat  
 Sample weight: 1.112

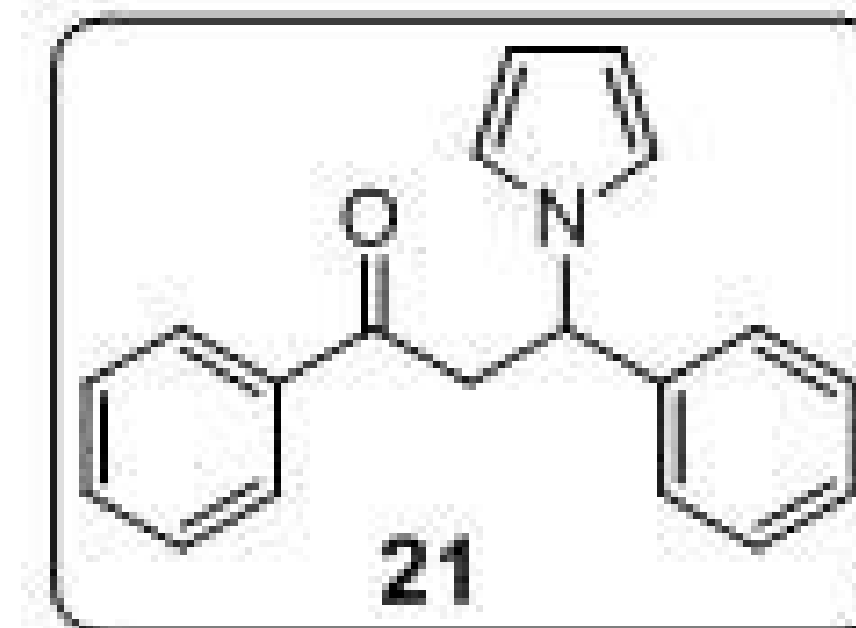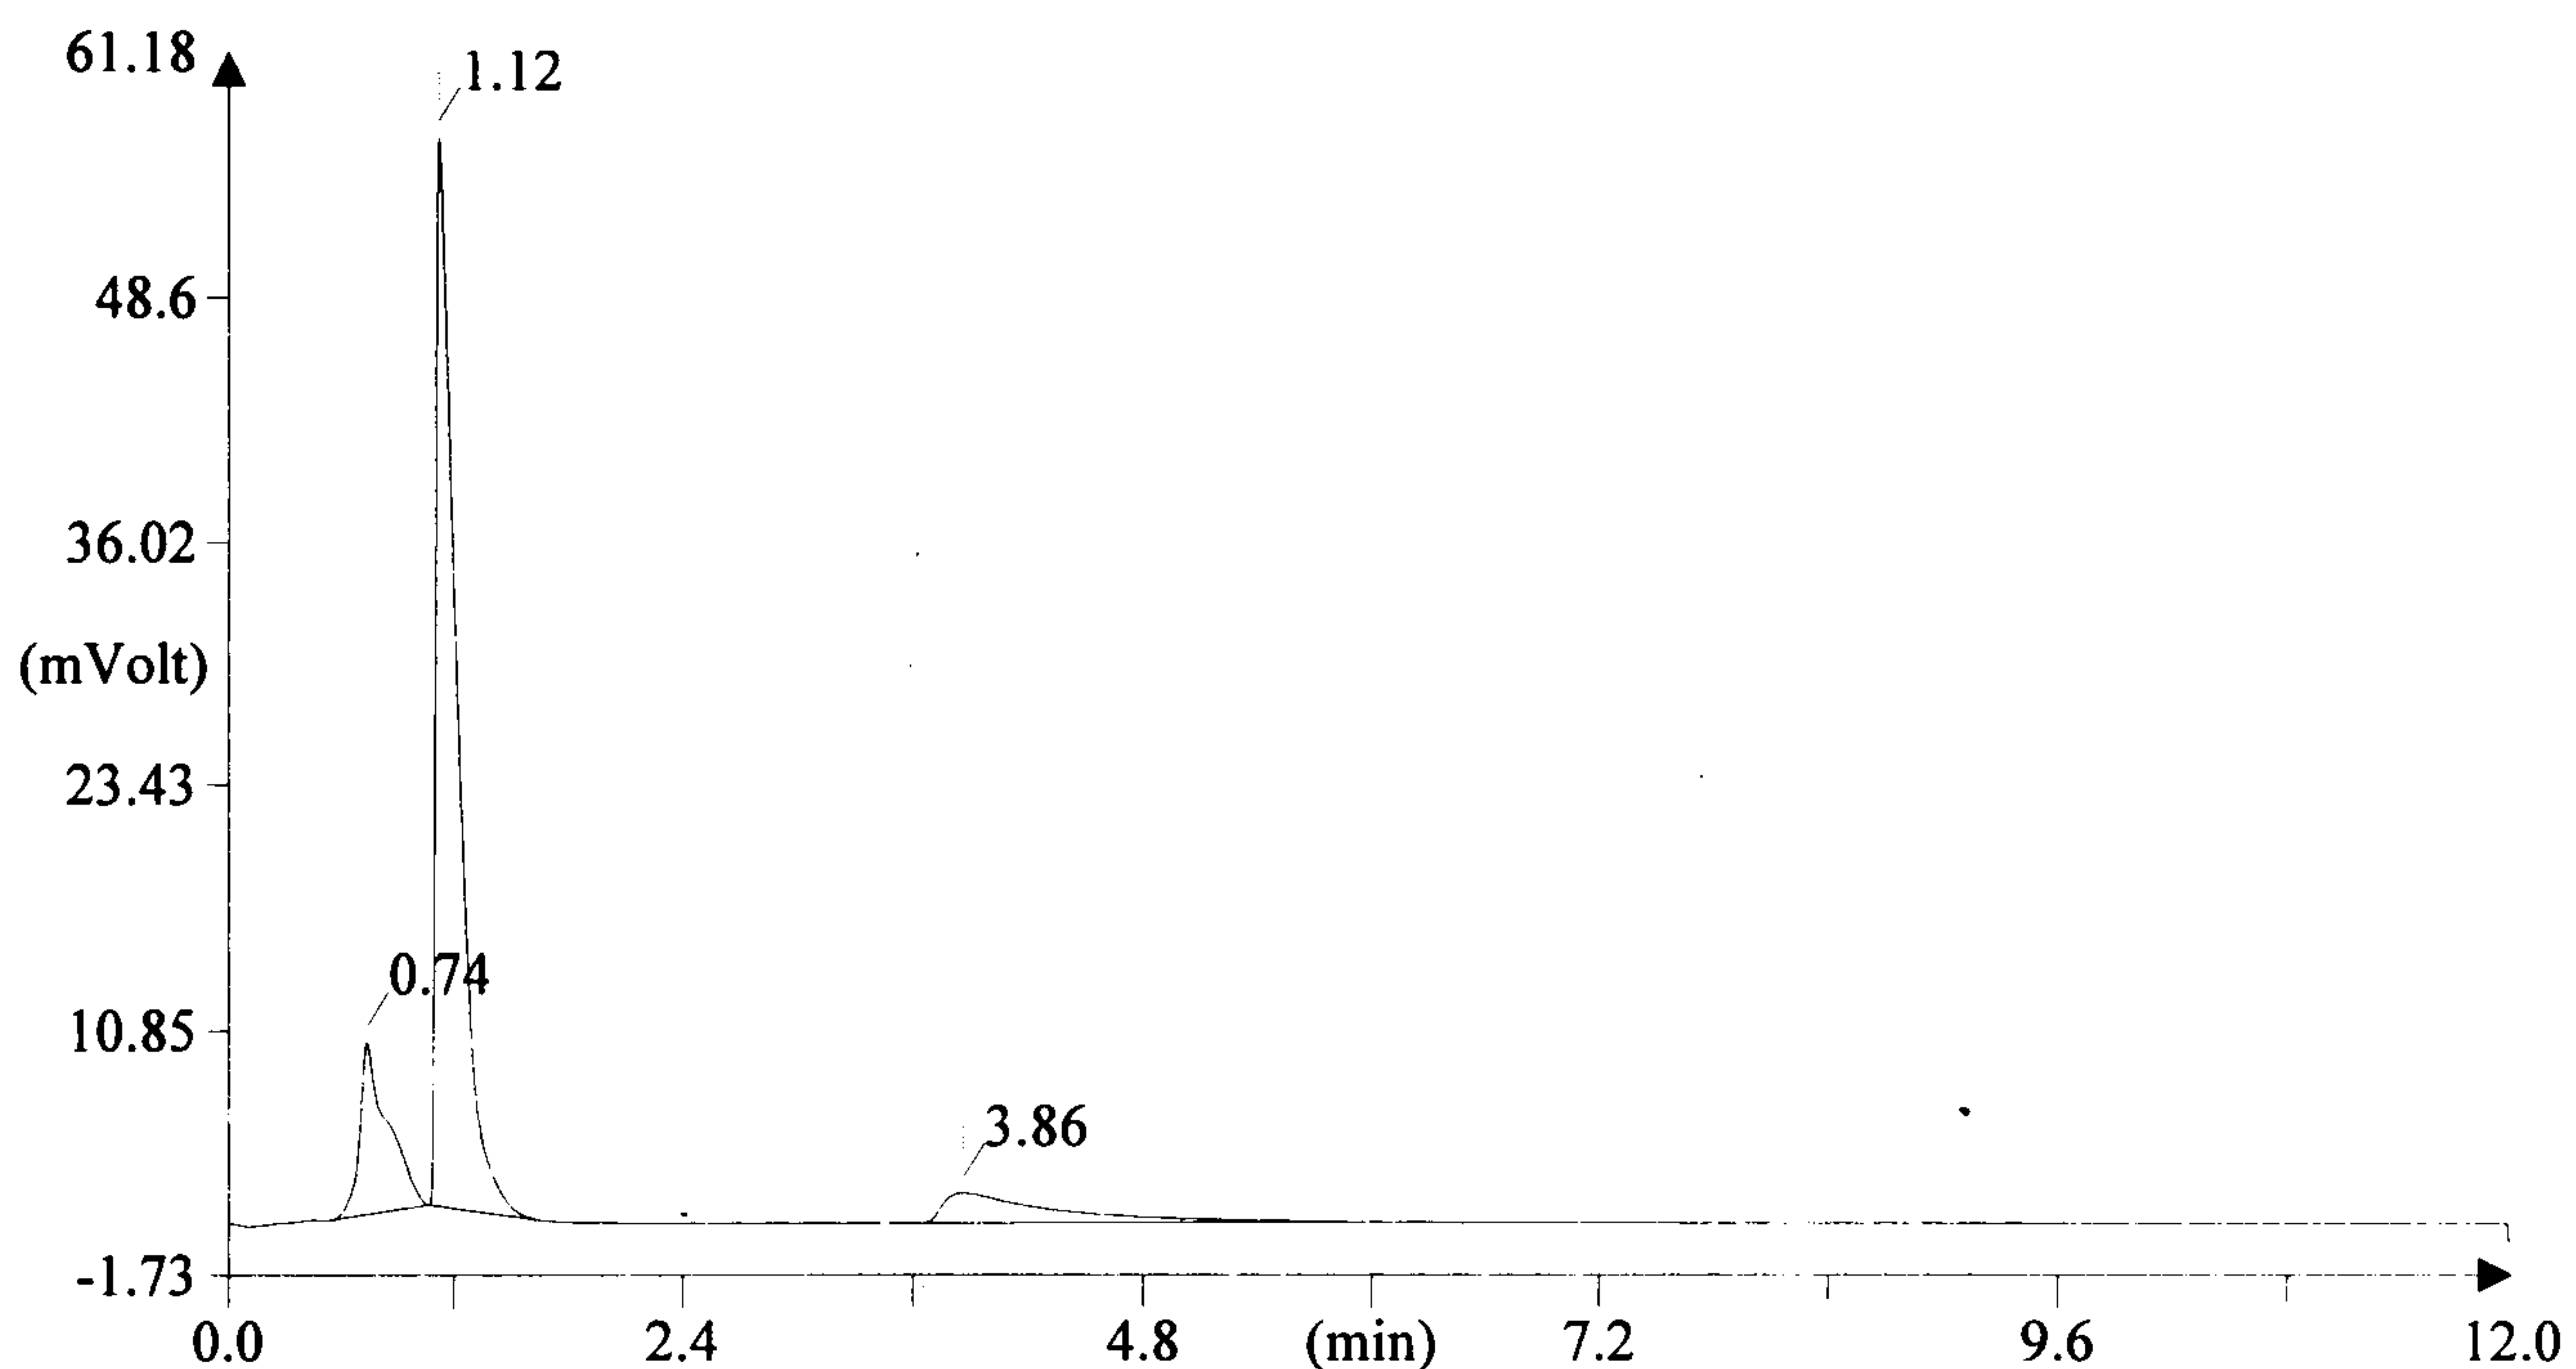

| Element Name | Element % | Ret. Time |
|--------------|-----------|-----------|
| Nitrogen     | 5.15      | 0.74      |
| Carbon       | 82.75     | 1.12      |
| Hydrogen     | 6.28      | 3.86      |

*OBZ*



FLASH EA 1112 SERIES CHN REPORT  
SCHOOL OF CHEMISTRY  
UNIVERSITY OF HYDERABAD

Method filename: I:\Program Files\Thermo Finnigan\Eager 300 for EA1112\DATA\Sys\_data\_exa  
Sample ID: MBC-11-53 (# 18)  
Analysis type: UnkNown  
Chromatogram filename: UNK-06042011-18.dat  
Sample weight: 1.117

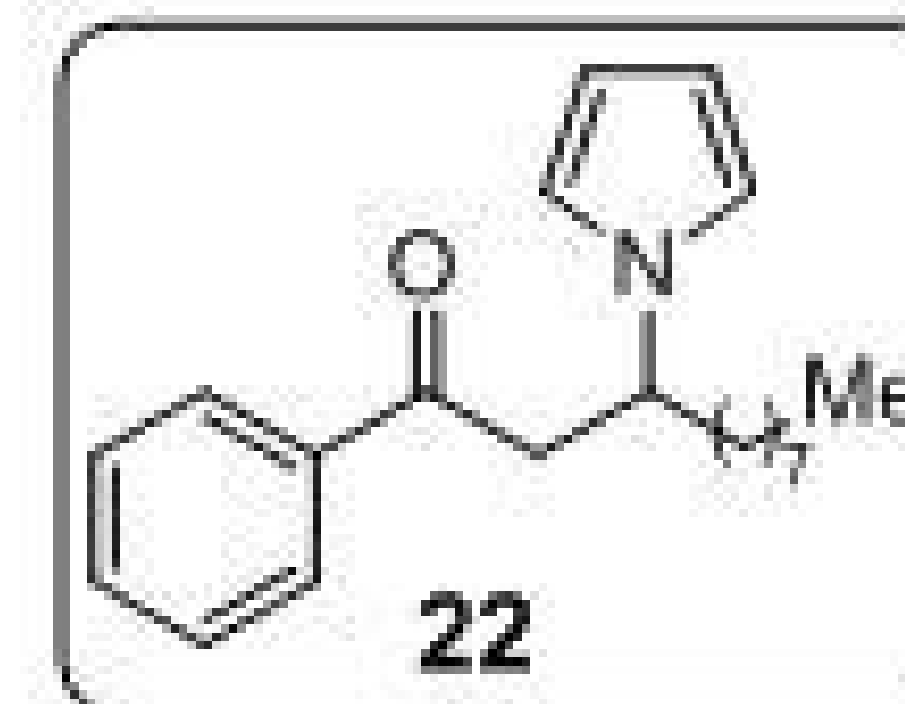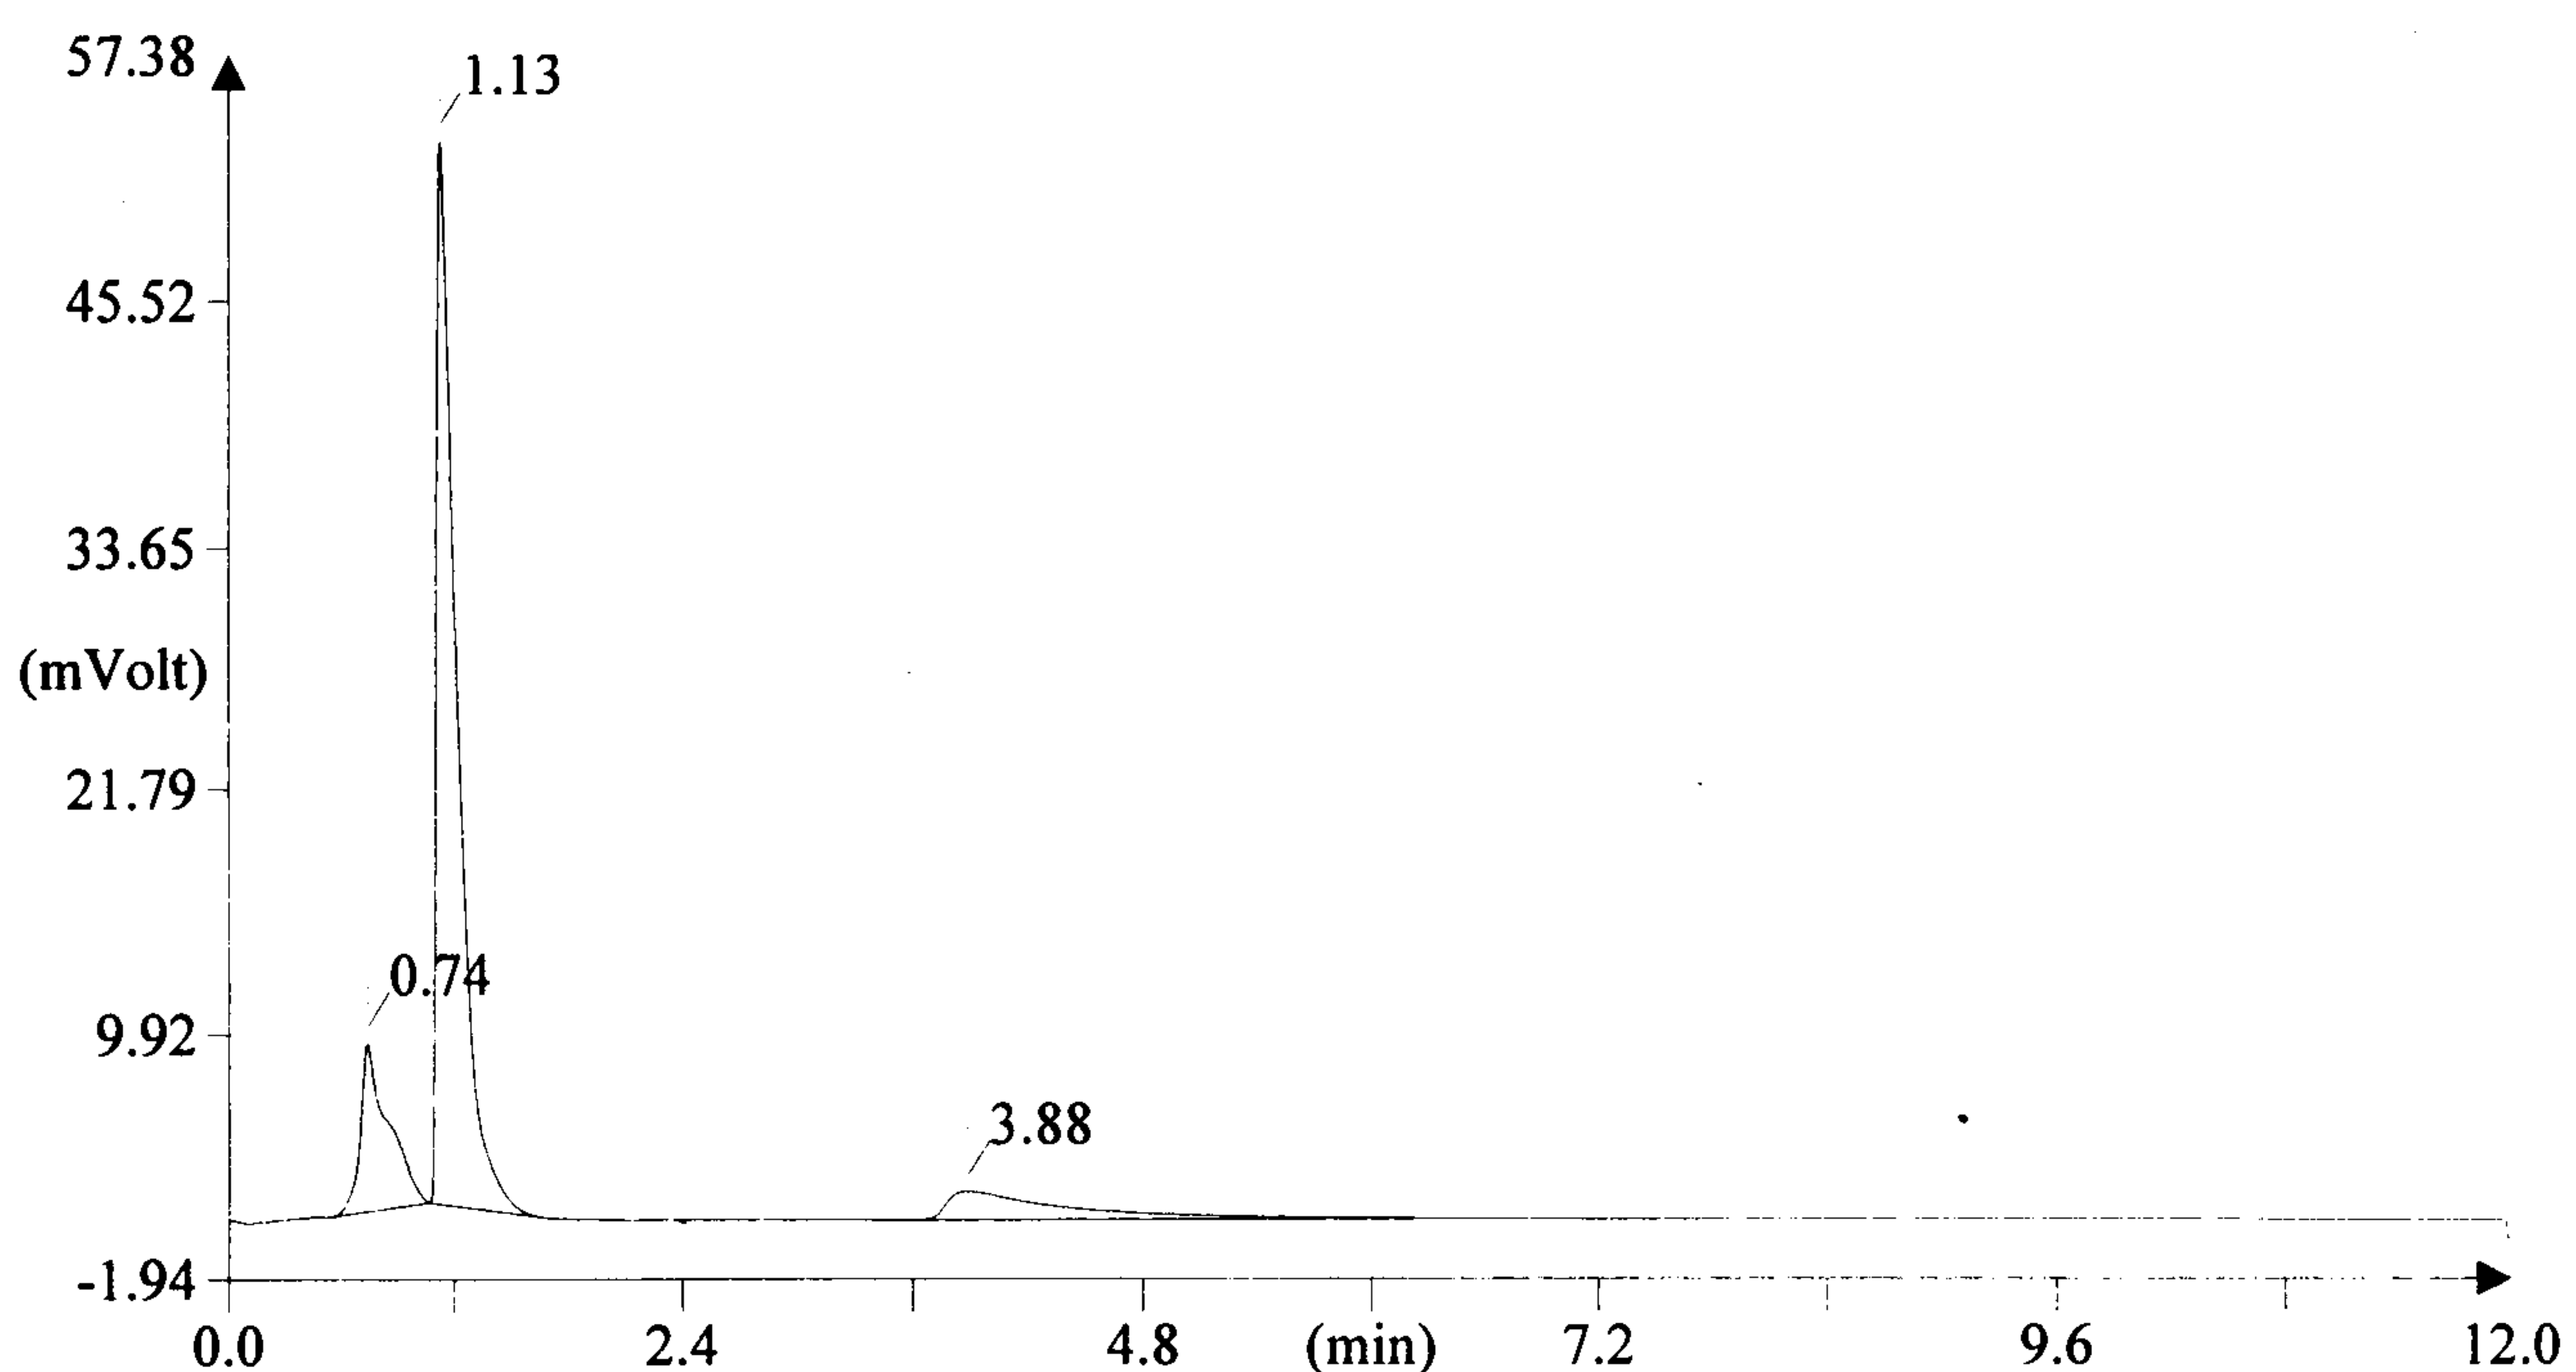

| Element Name | Element % | Ret. Time |
|--------------|-----------|-----------|
| Nitrogen     | 4. 61     | 0. 74     |
| Carbon       | 80. 78    | 1. 13     |
| Hydrogen     | 9. 41     | 3. 88     |

2082

# FLASH EA 1112 SERIES CHN REPORT

## SCHOOL OF CHEMISTRY

## UNIVERSITY OF HYDERABAD

Method filename: I:\Program Files\Thermo Finnigan\Eager 300 for EA1112\DATA\Sys\_data\_exa  
 Sample ID: MBC-11-110-T2 (# 155)  
 Analysis type: UnkNown  
 Chromatogram filename: UNK-01042011-15.dat  
 Sample weight: 1.196

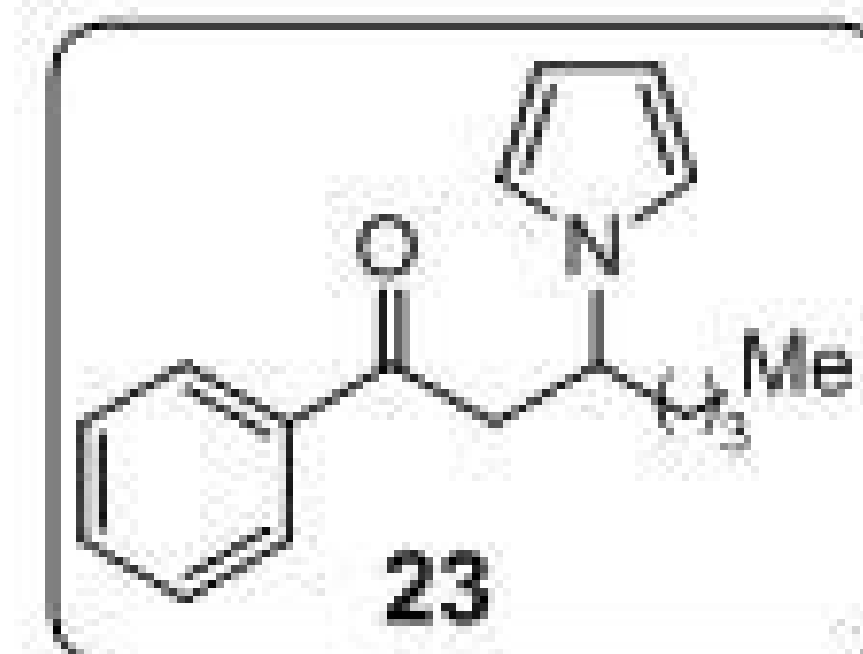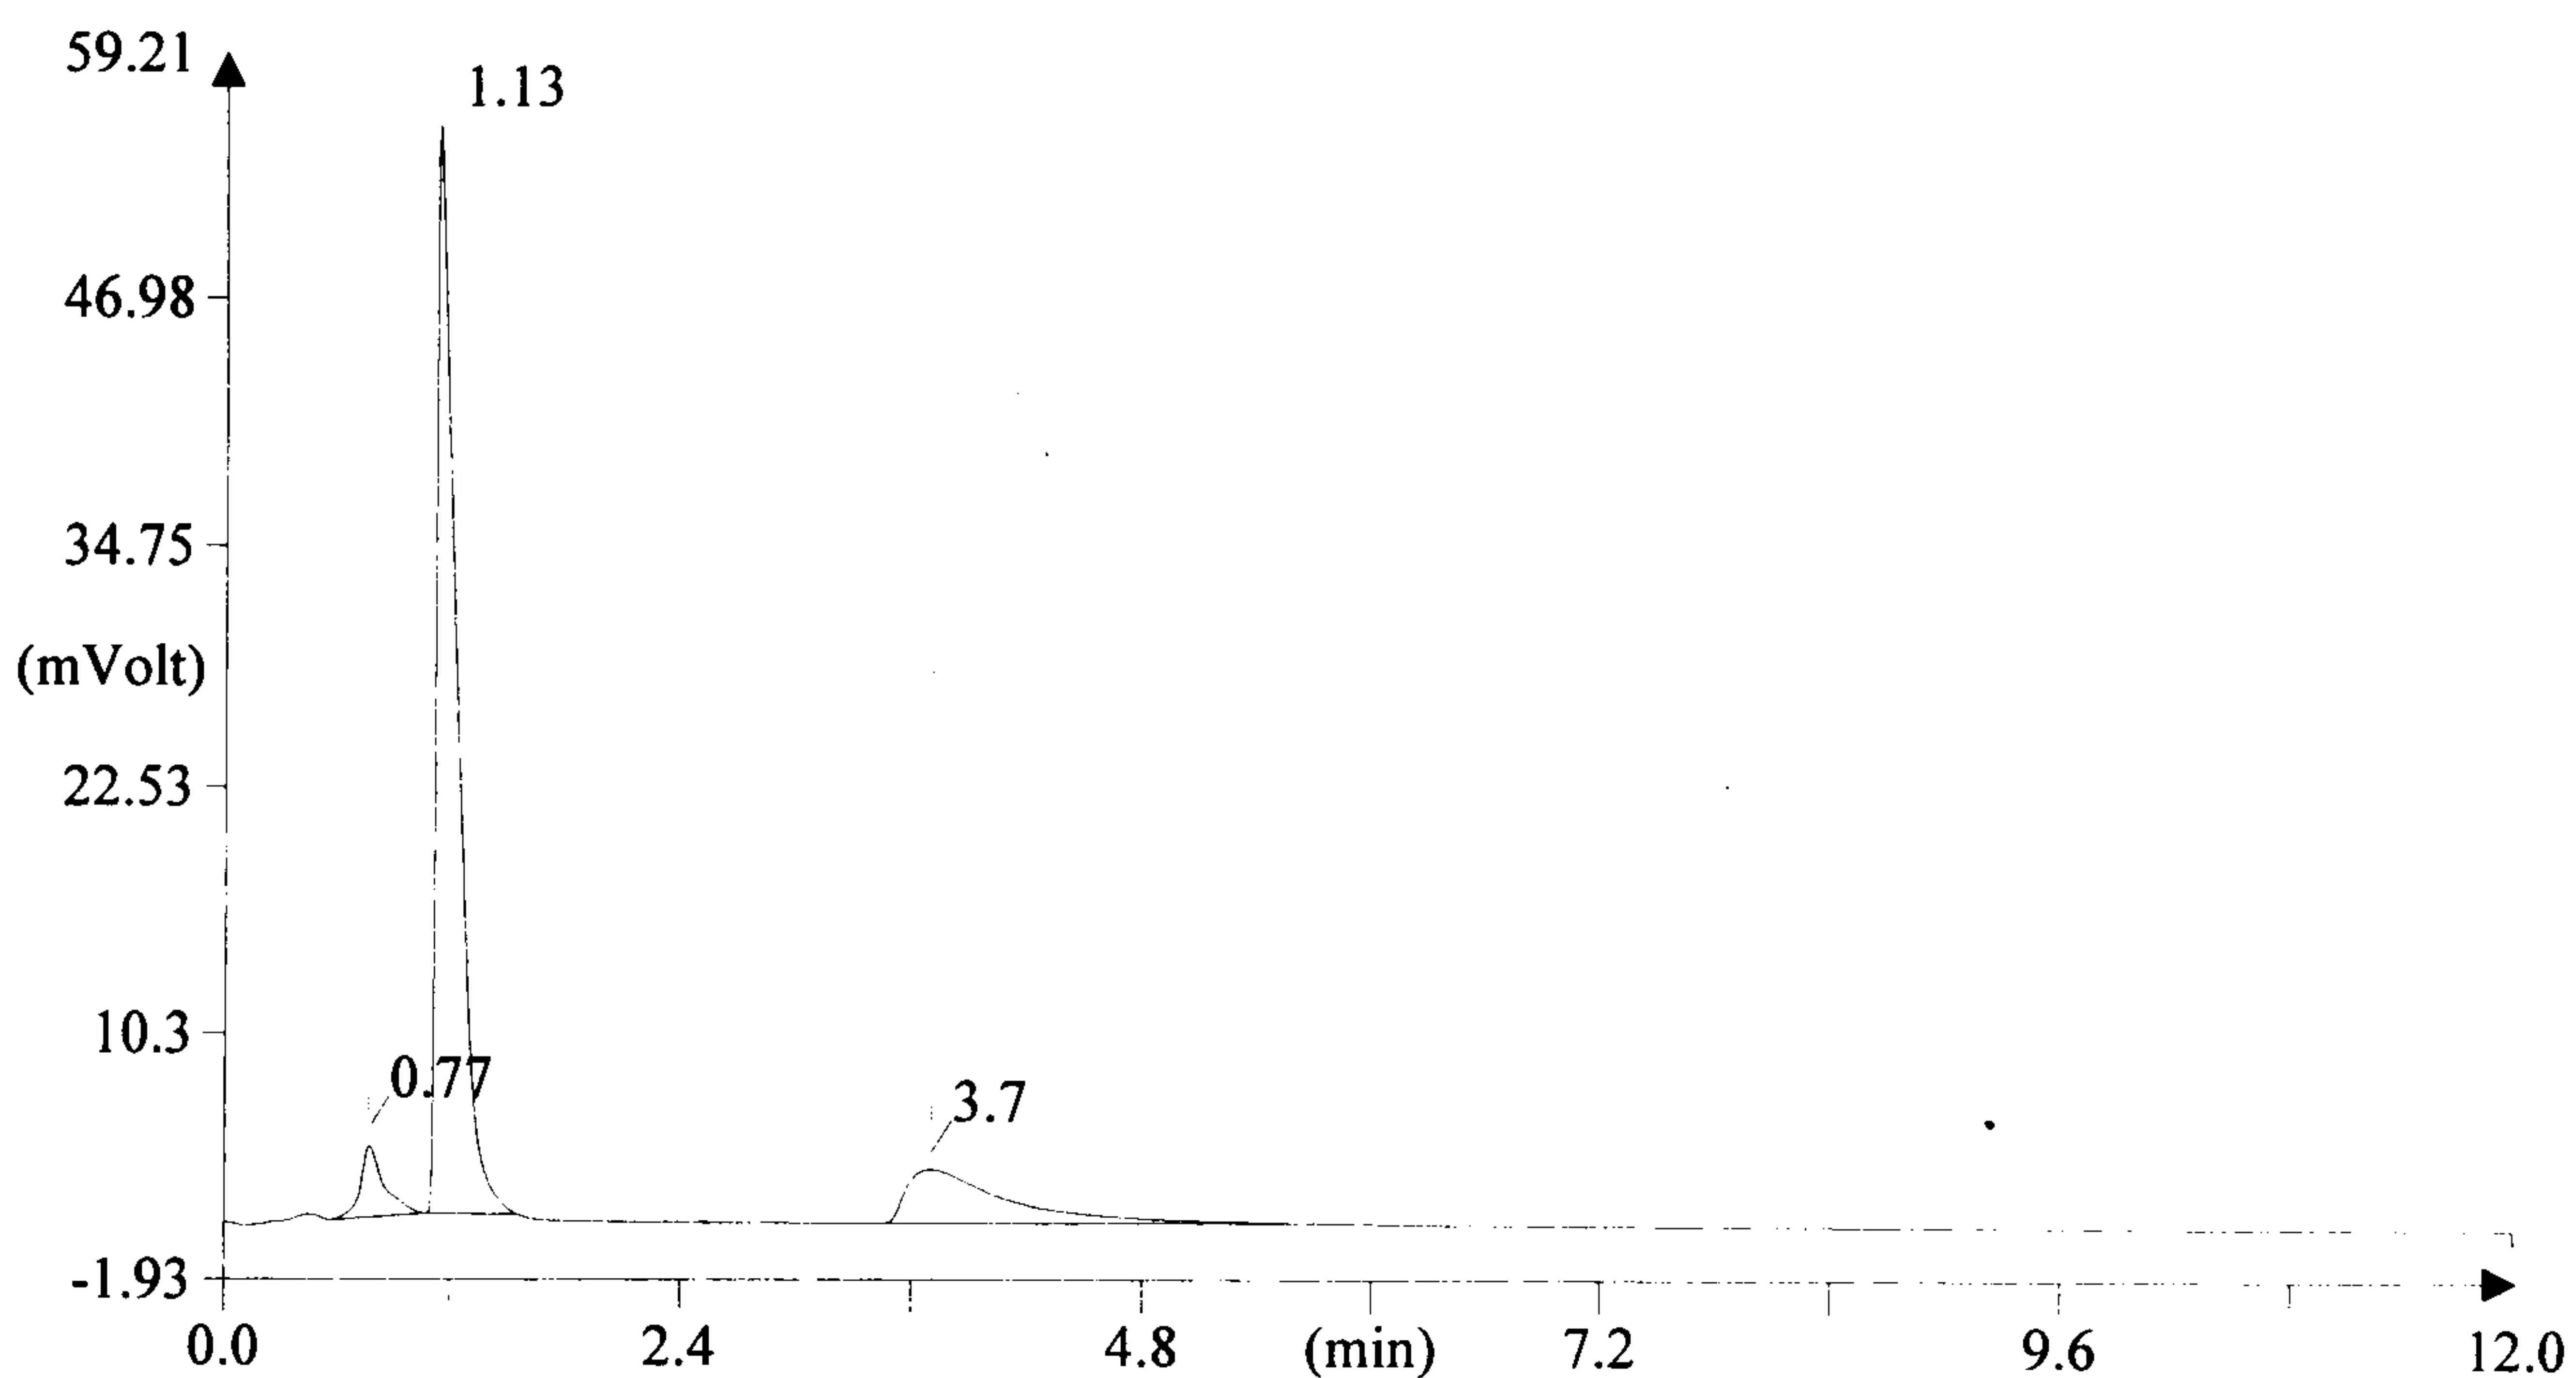

| Element Name | Element % | Ret. Time |
|--------------|-----------|-----------|
| Nitrogen     | 5.41      | 0.77      |
| Carbon       | 79.85     | 1.13      |
| Hydrogen     | 8.32      | 3.70      |

*Signature*

# FLASH EA 1112 SERIES CHN REPORT

## SCHOOL OF CHEMISTRY

## UNIVERSITY OF HYDERABAD

Method filename: E:\Program Files\Thermo Finnigan\Eager 300 for EA1112\DATA\Sys\_data\_ex  
 Sample ID: MBC-12-9-T2 (# 182)  
 Analysis type: UnkNown  
 Chromatogram filename: UNK-22082011-12.dat  
 Sample weight: 1.036

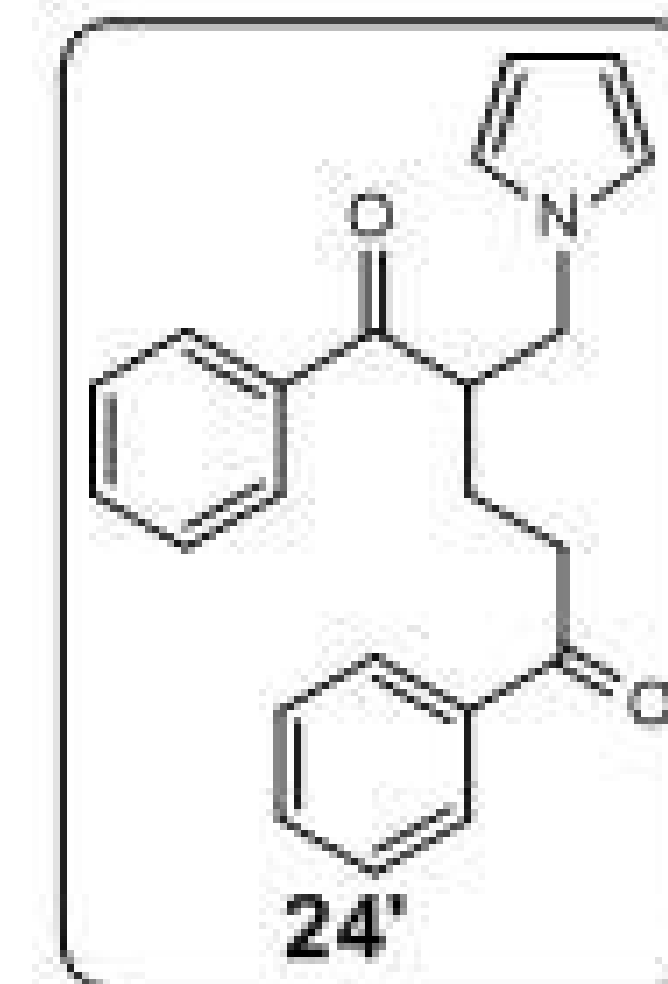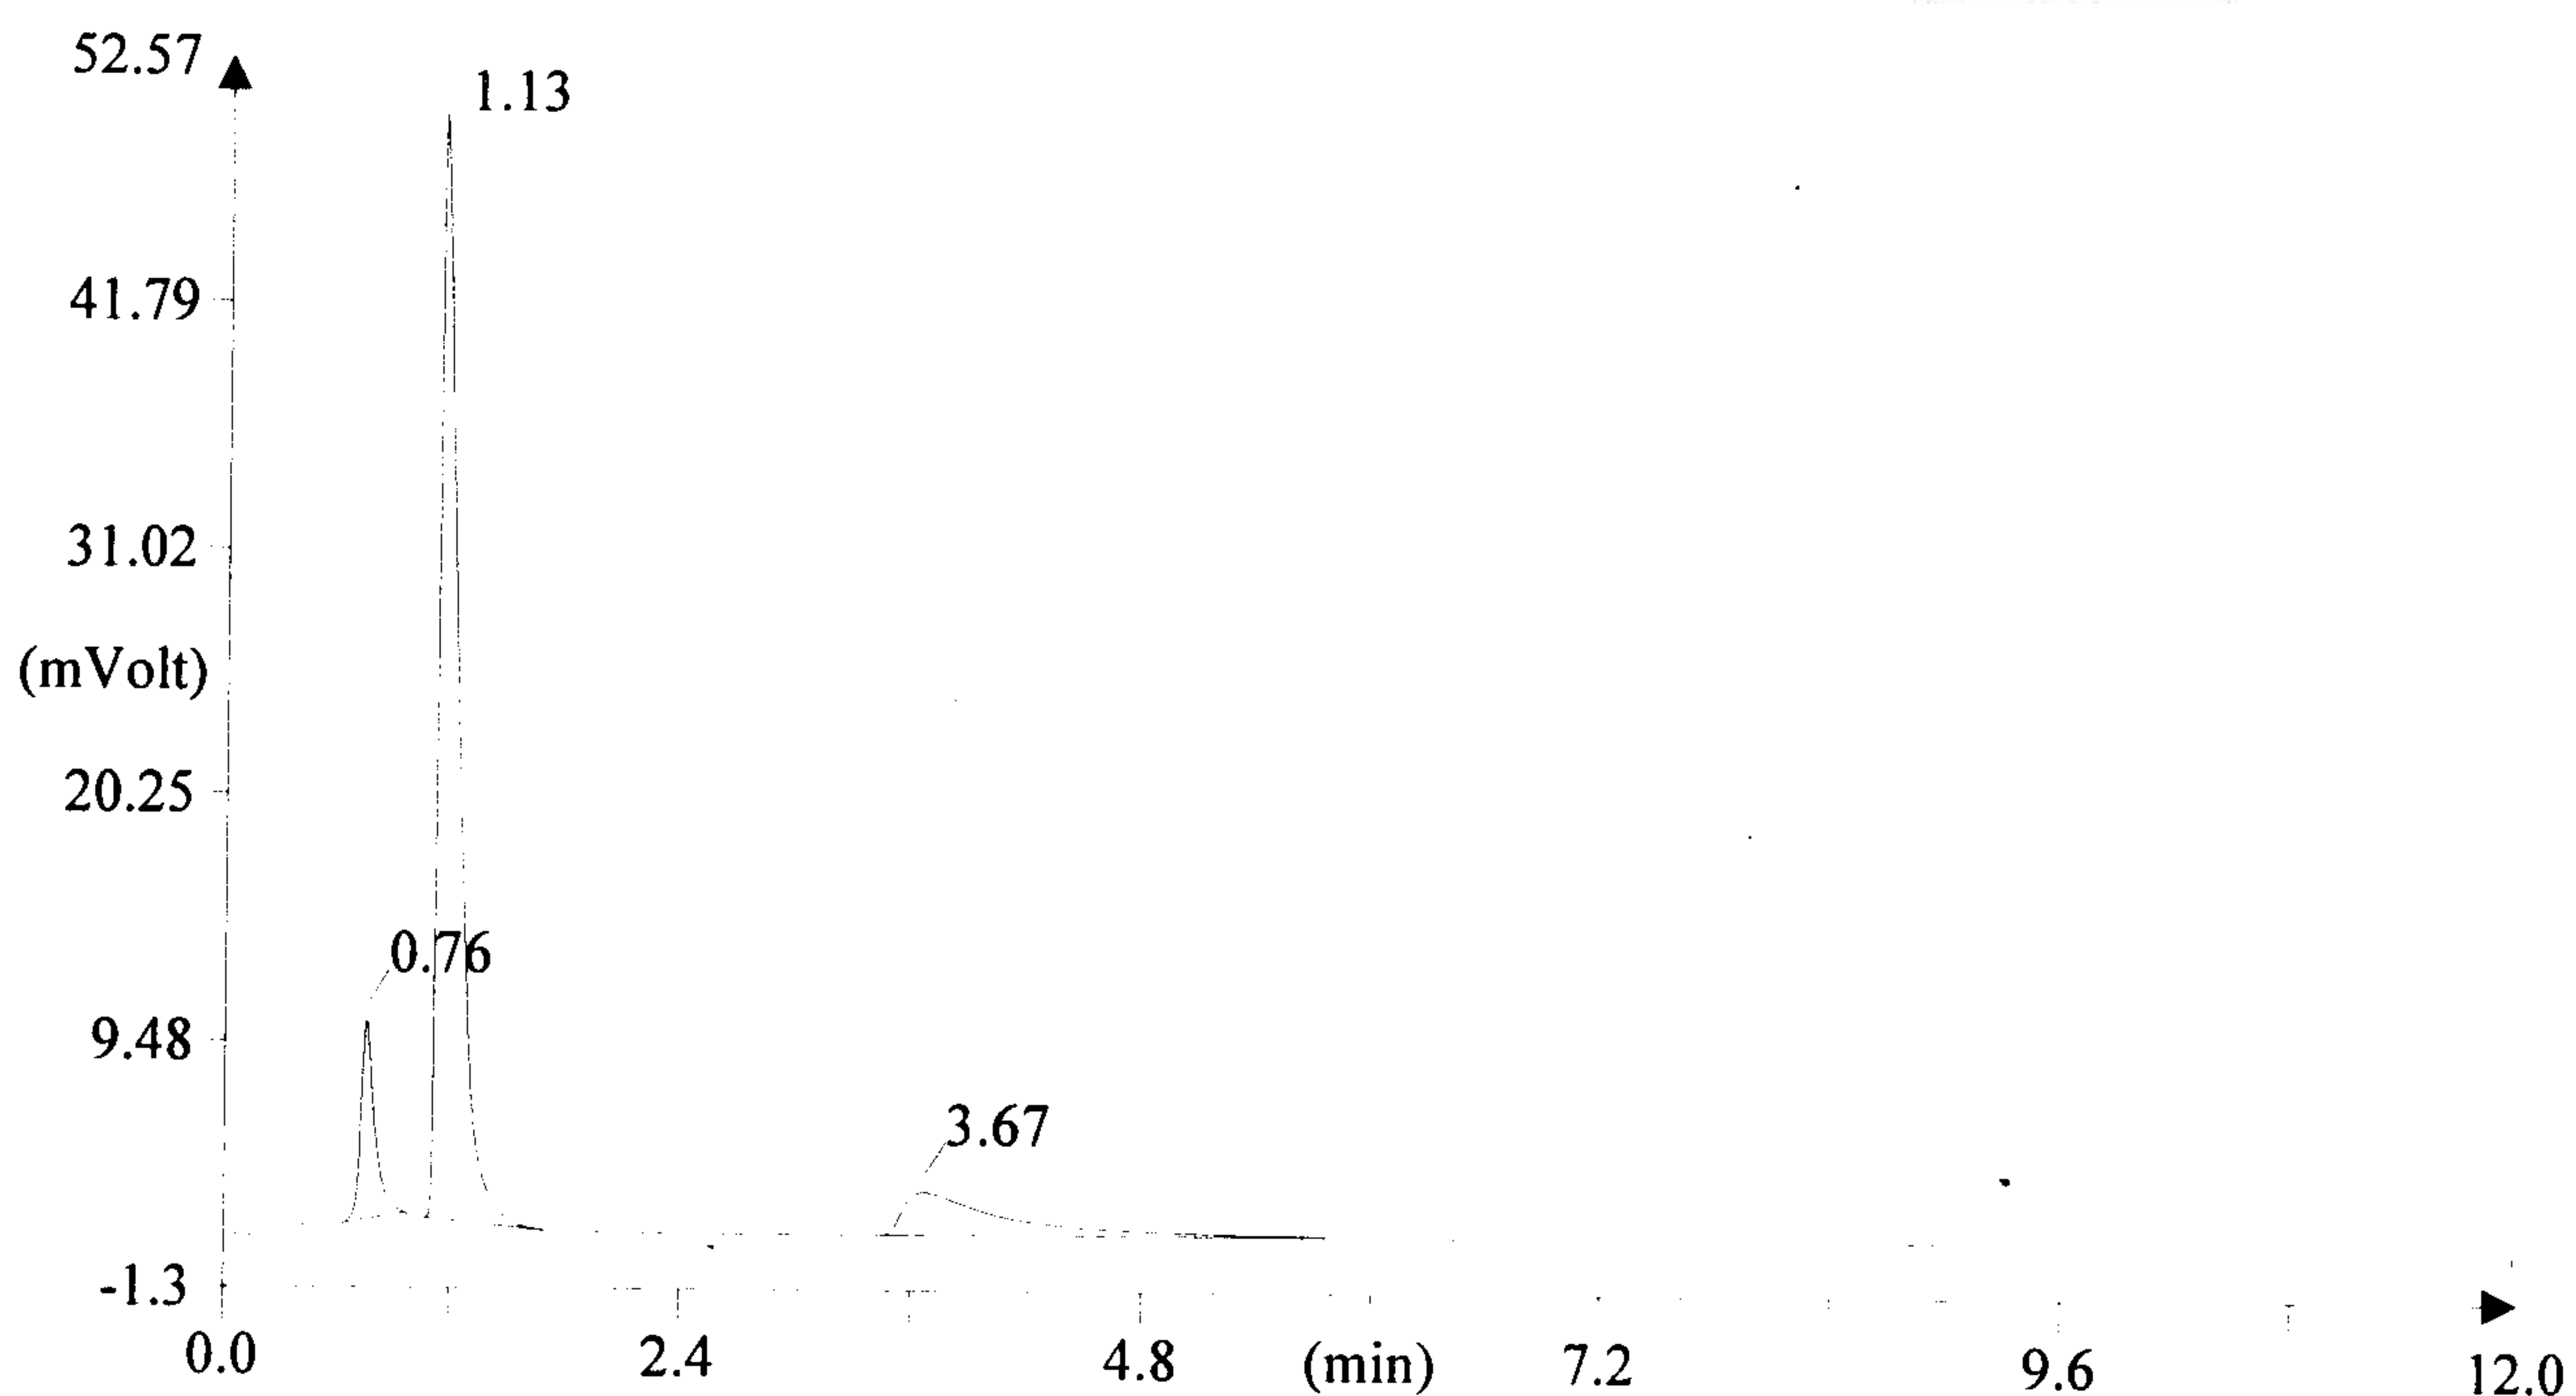

| Element Name | Element % | Ret. Time |
|--------------|-----------|-----------|
| Nitrogen     | 4.35      | 0.76      |
| Carbon       | 79.65     | 1.13      |
| Hydrogen     | 6.31      | 3.67      |

*Signature*



# FLASH EA 1112 SERIES CHN REPORT

## SCHOOL OF CHEMISTRY

## UNIVERSITY OF HYDERABAD

Method filename: E:\Program Files\Thermo Finnigan\Eager 300 for EA1112\DATA\Sys\_data\_ex  
Sample ID: MBC-12-10-T1 (# 175)  
Analysis type: UnkNown  
Chromatogram filename: UNK-22082011-5.dat  
Sample weight: 1.165

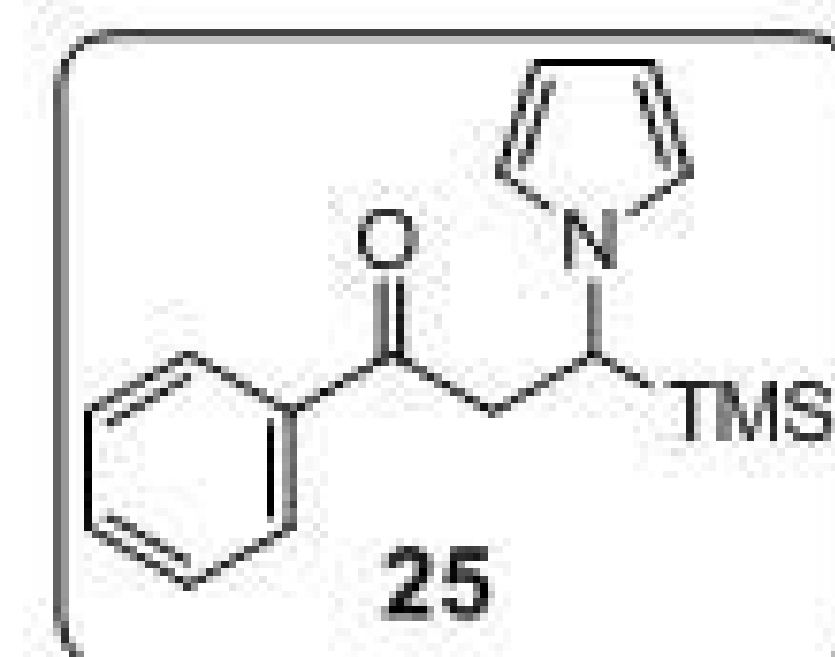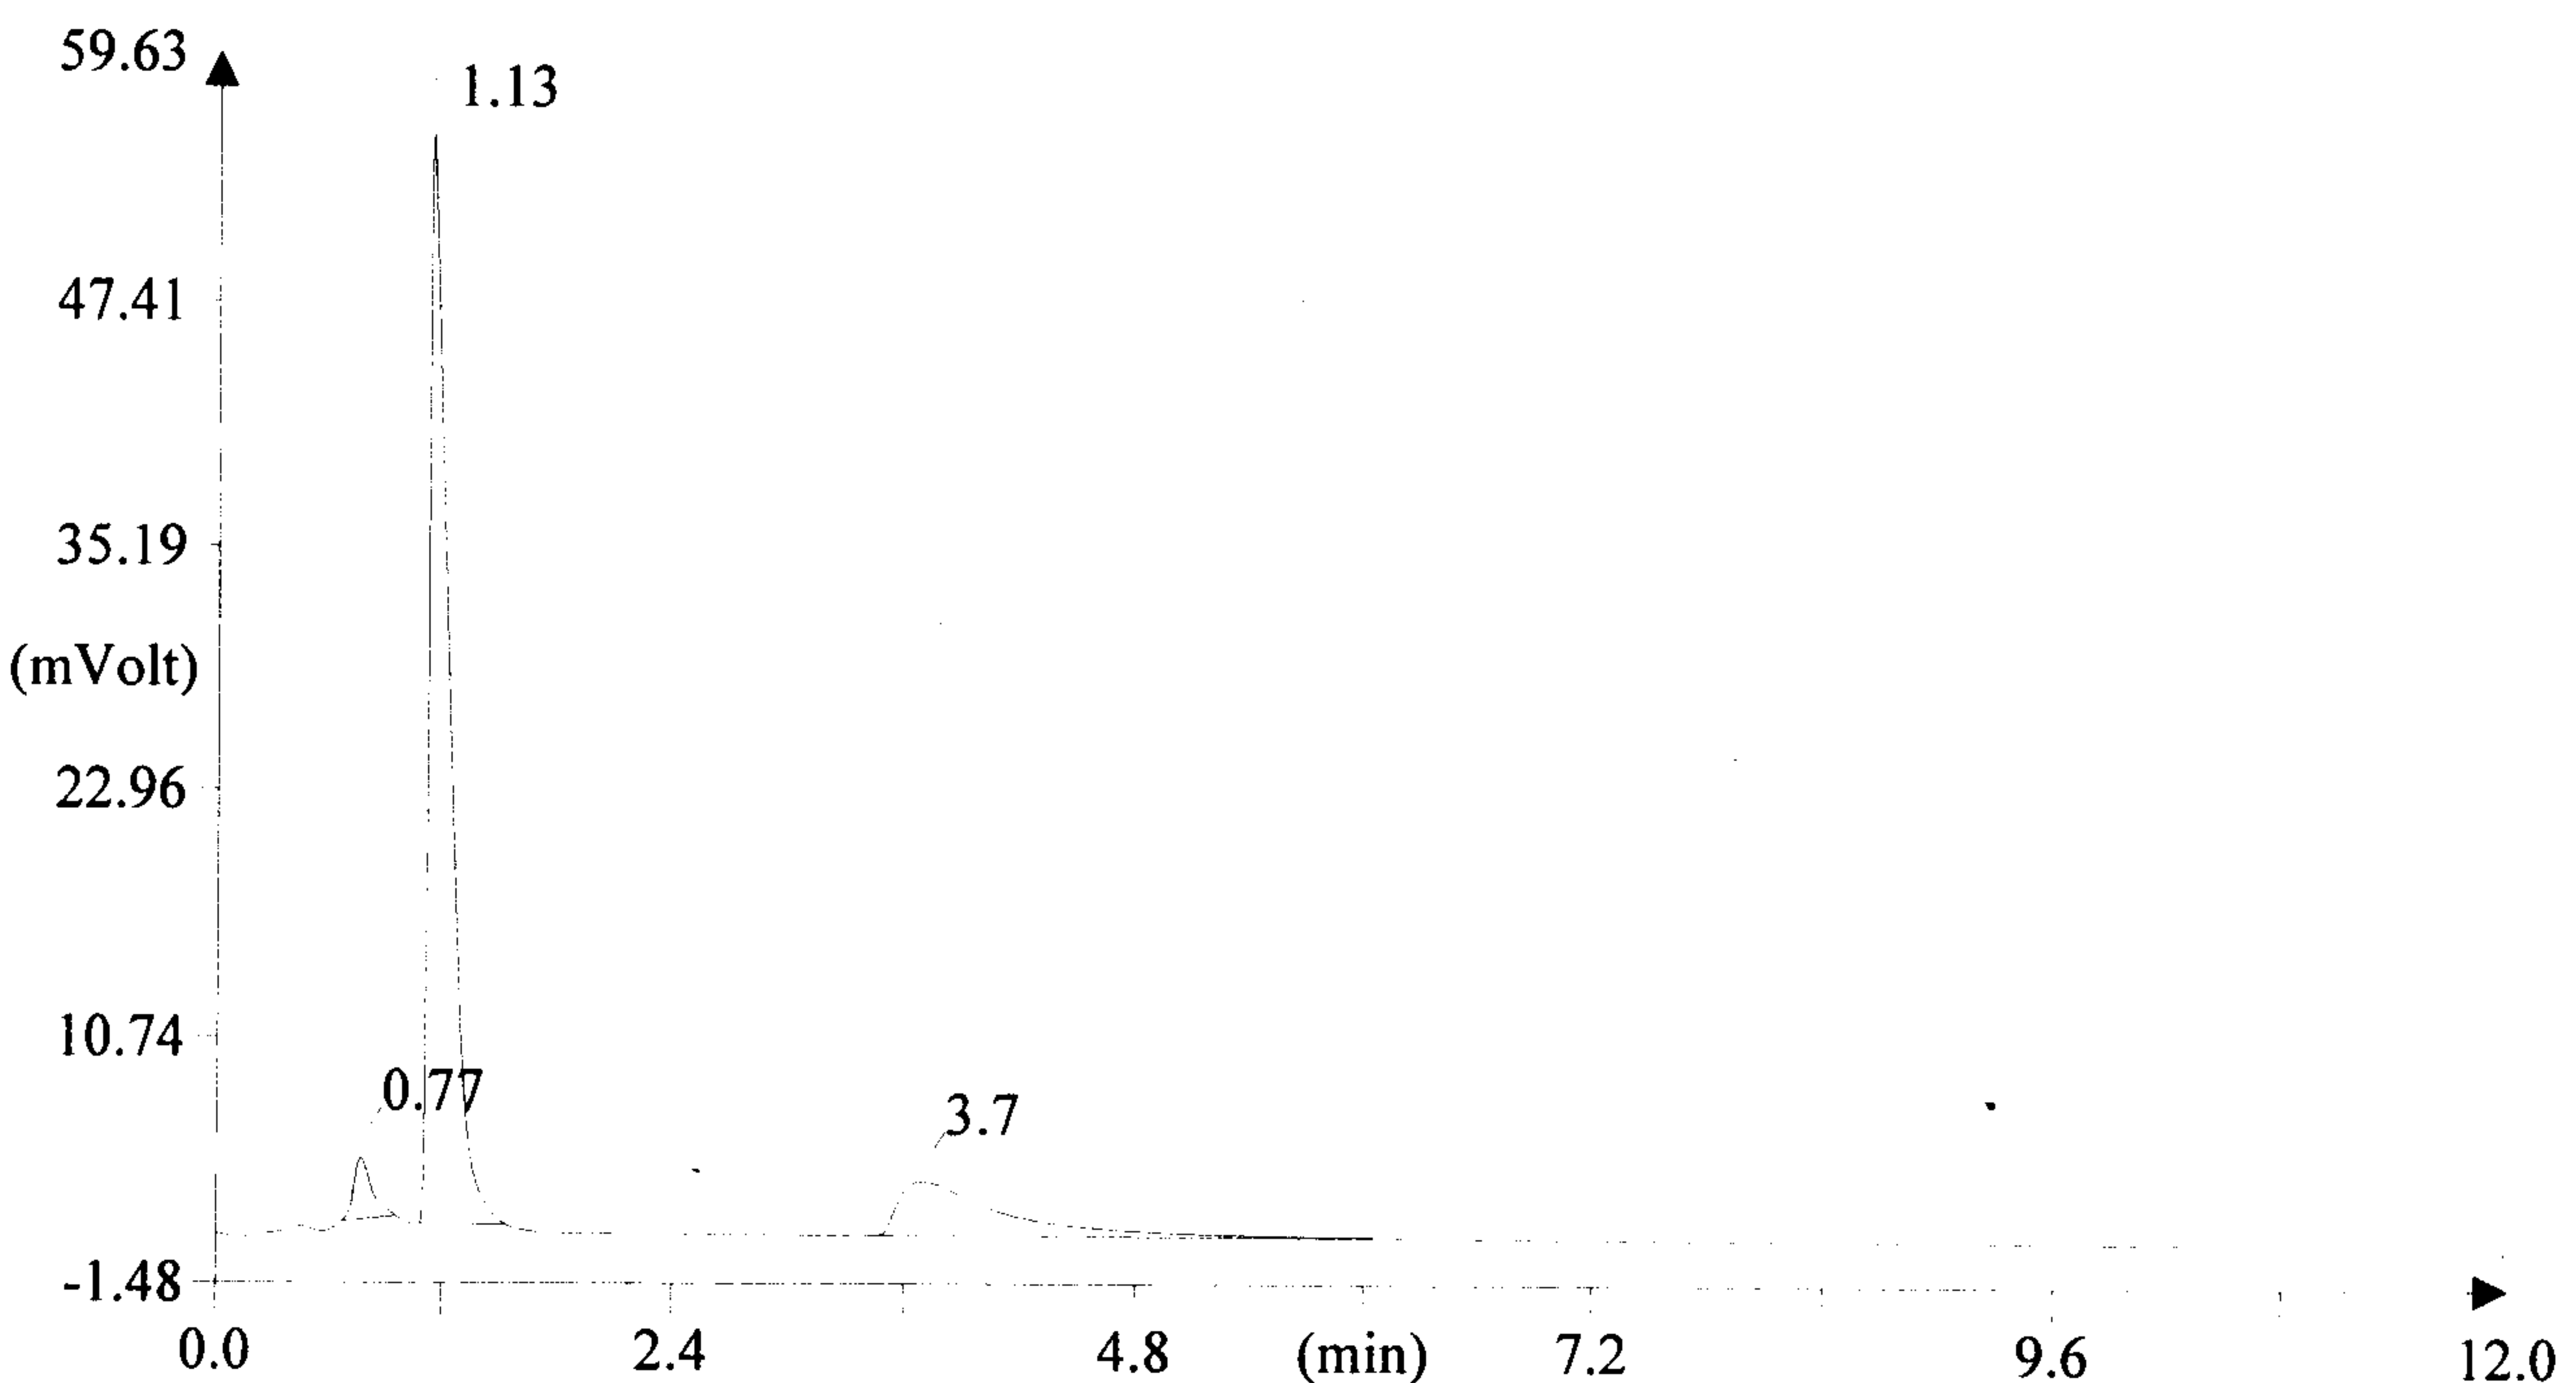

| Element Name | Element % | Ret. Time |
|--------------|-----------|-----------|
| Nitrogen     | 5. 21     | 0. 77     |
| Carbon       | 70. 58    | 1. 13     |
| Hydrogen     | 7. 76     | 3. 70     |

*Signature*



# FLASH EA 1112 SERIES CHN REPORT

## SCHOOL OF CHEMISTRY

## UNIVERSITY OF HYDERABAD

Method filename: E:\Program Files\Thermo Finnigan\Eager 300 for EA1112\DATA\Sys\_data\_ex  
Sample ID: MBC-11-64-T1 (# 112)  
Analysis type: UnkNown  
Chromatogram filename: UNK-12072011-2.dat  
Sample weight: 1.215

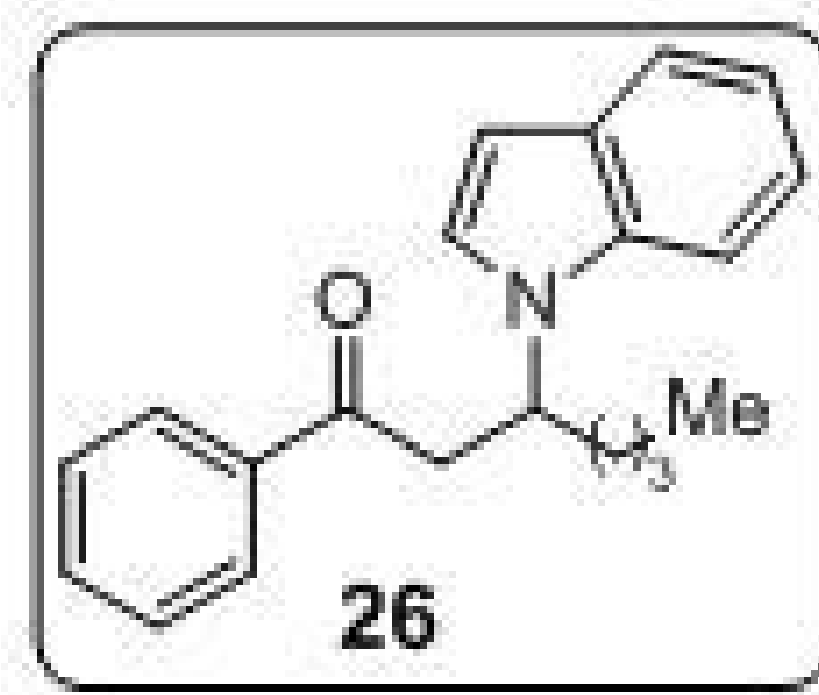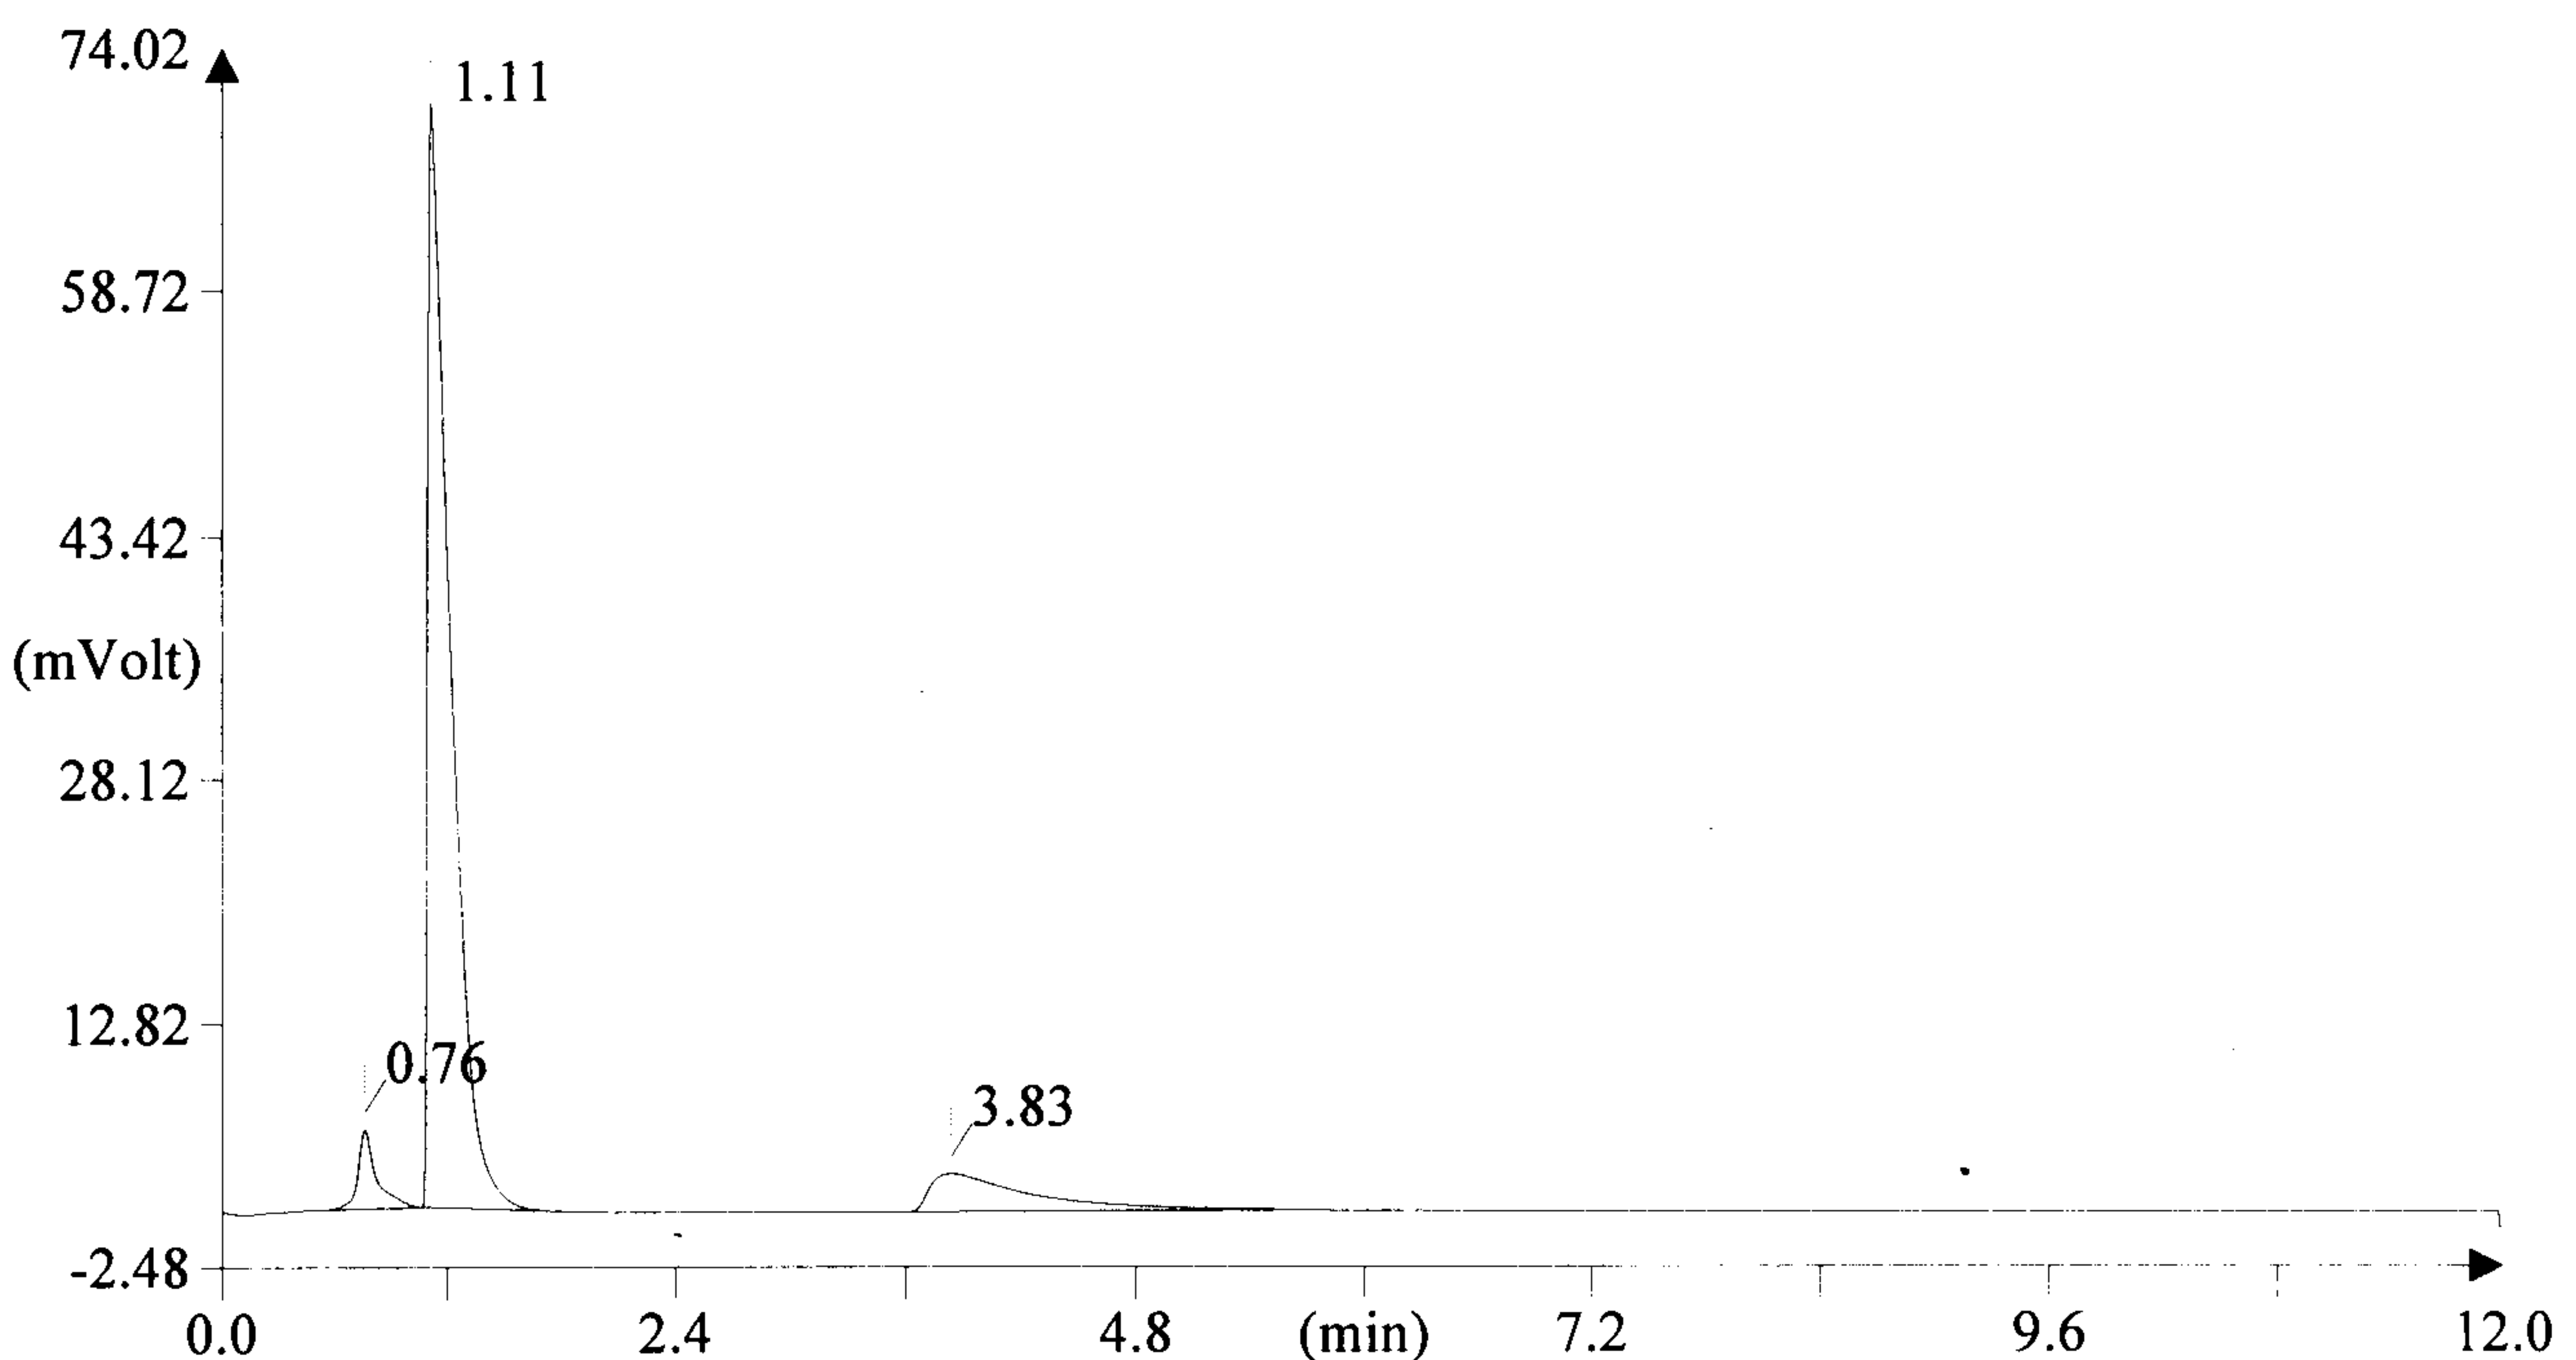

| Element Name | Element % | Ret. Time |
|--------------|-----------|-----------|
| Nitrogen     | 4. 51     | 0. 76     |
| Carbon       | 82. 45    | 1. 11     |
| Hydrogen     | 7. 65     | 3. 83     |

*Signature*

# FLASH EA 1112 SERIES CHN REPORT

## SCHOOL OF CHEMISTRY

## UNIVERSITY OF HYDERABAD

Method filename: E:\Program Files\Thermo Finnigan\Eager 300 for EA1112\DATA\Sys\_data\_ex  
 Sample ID: MBC-11-64-T3 (# 113)  
 Analysis type: UnkNown  
 Chromatogram filename: UNK-12072011-3.dat  
 Sample weight: 1.206

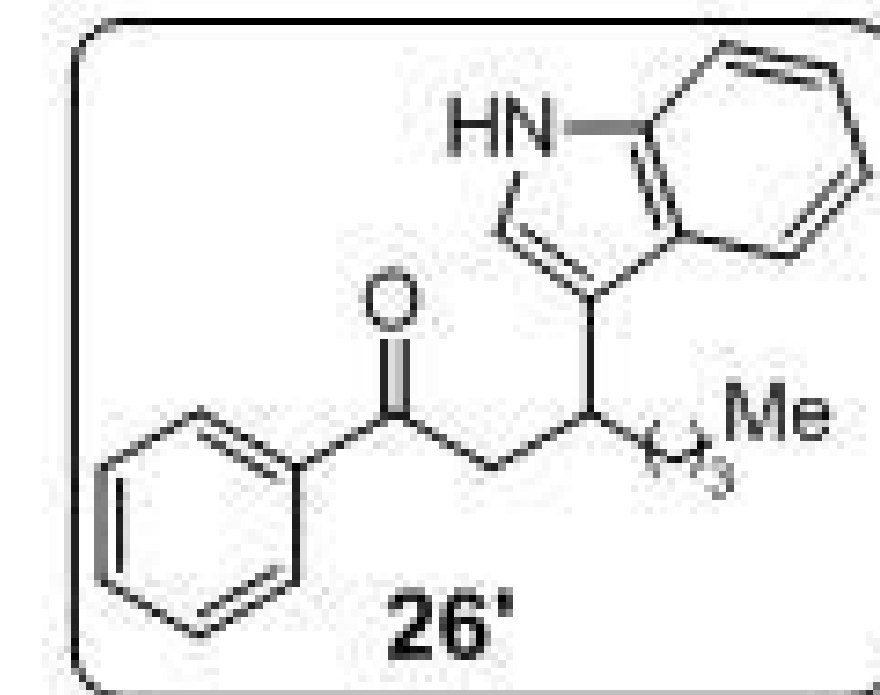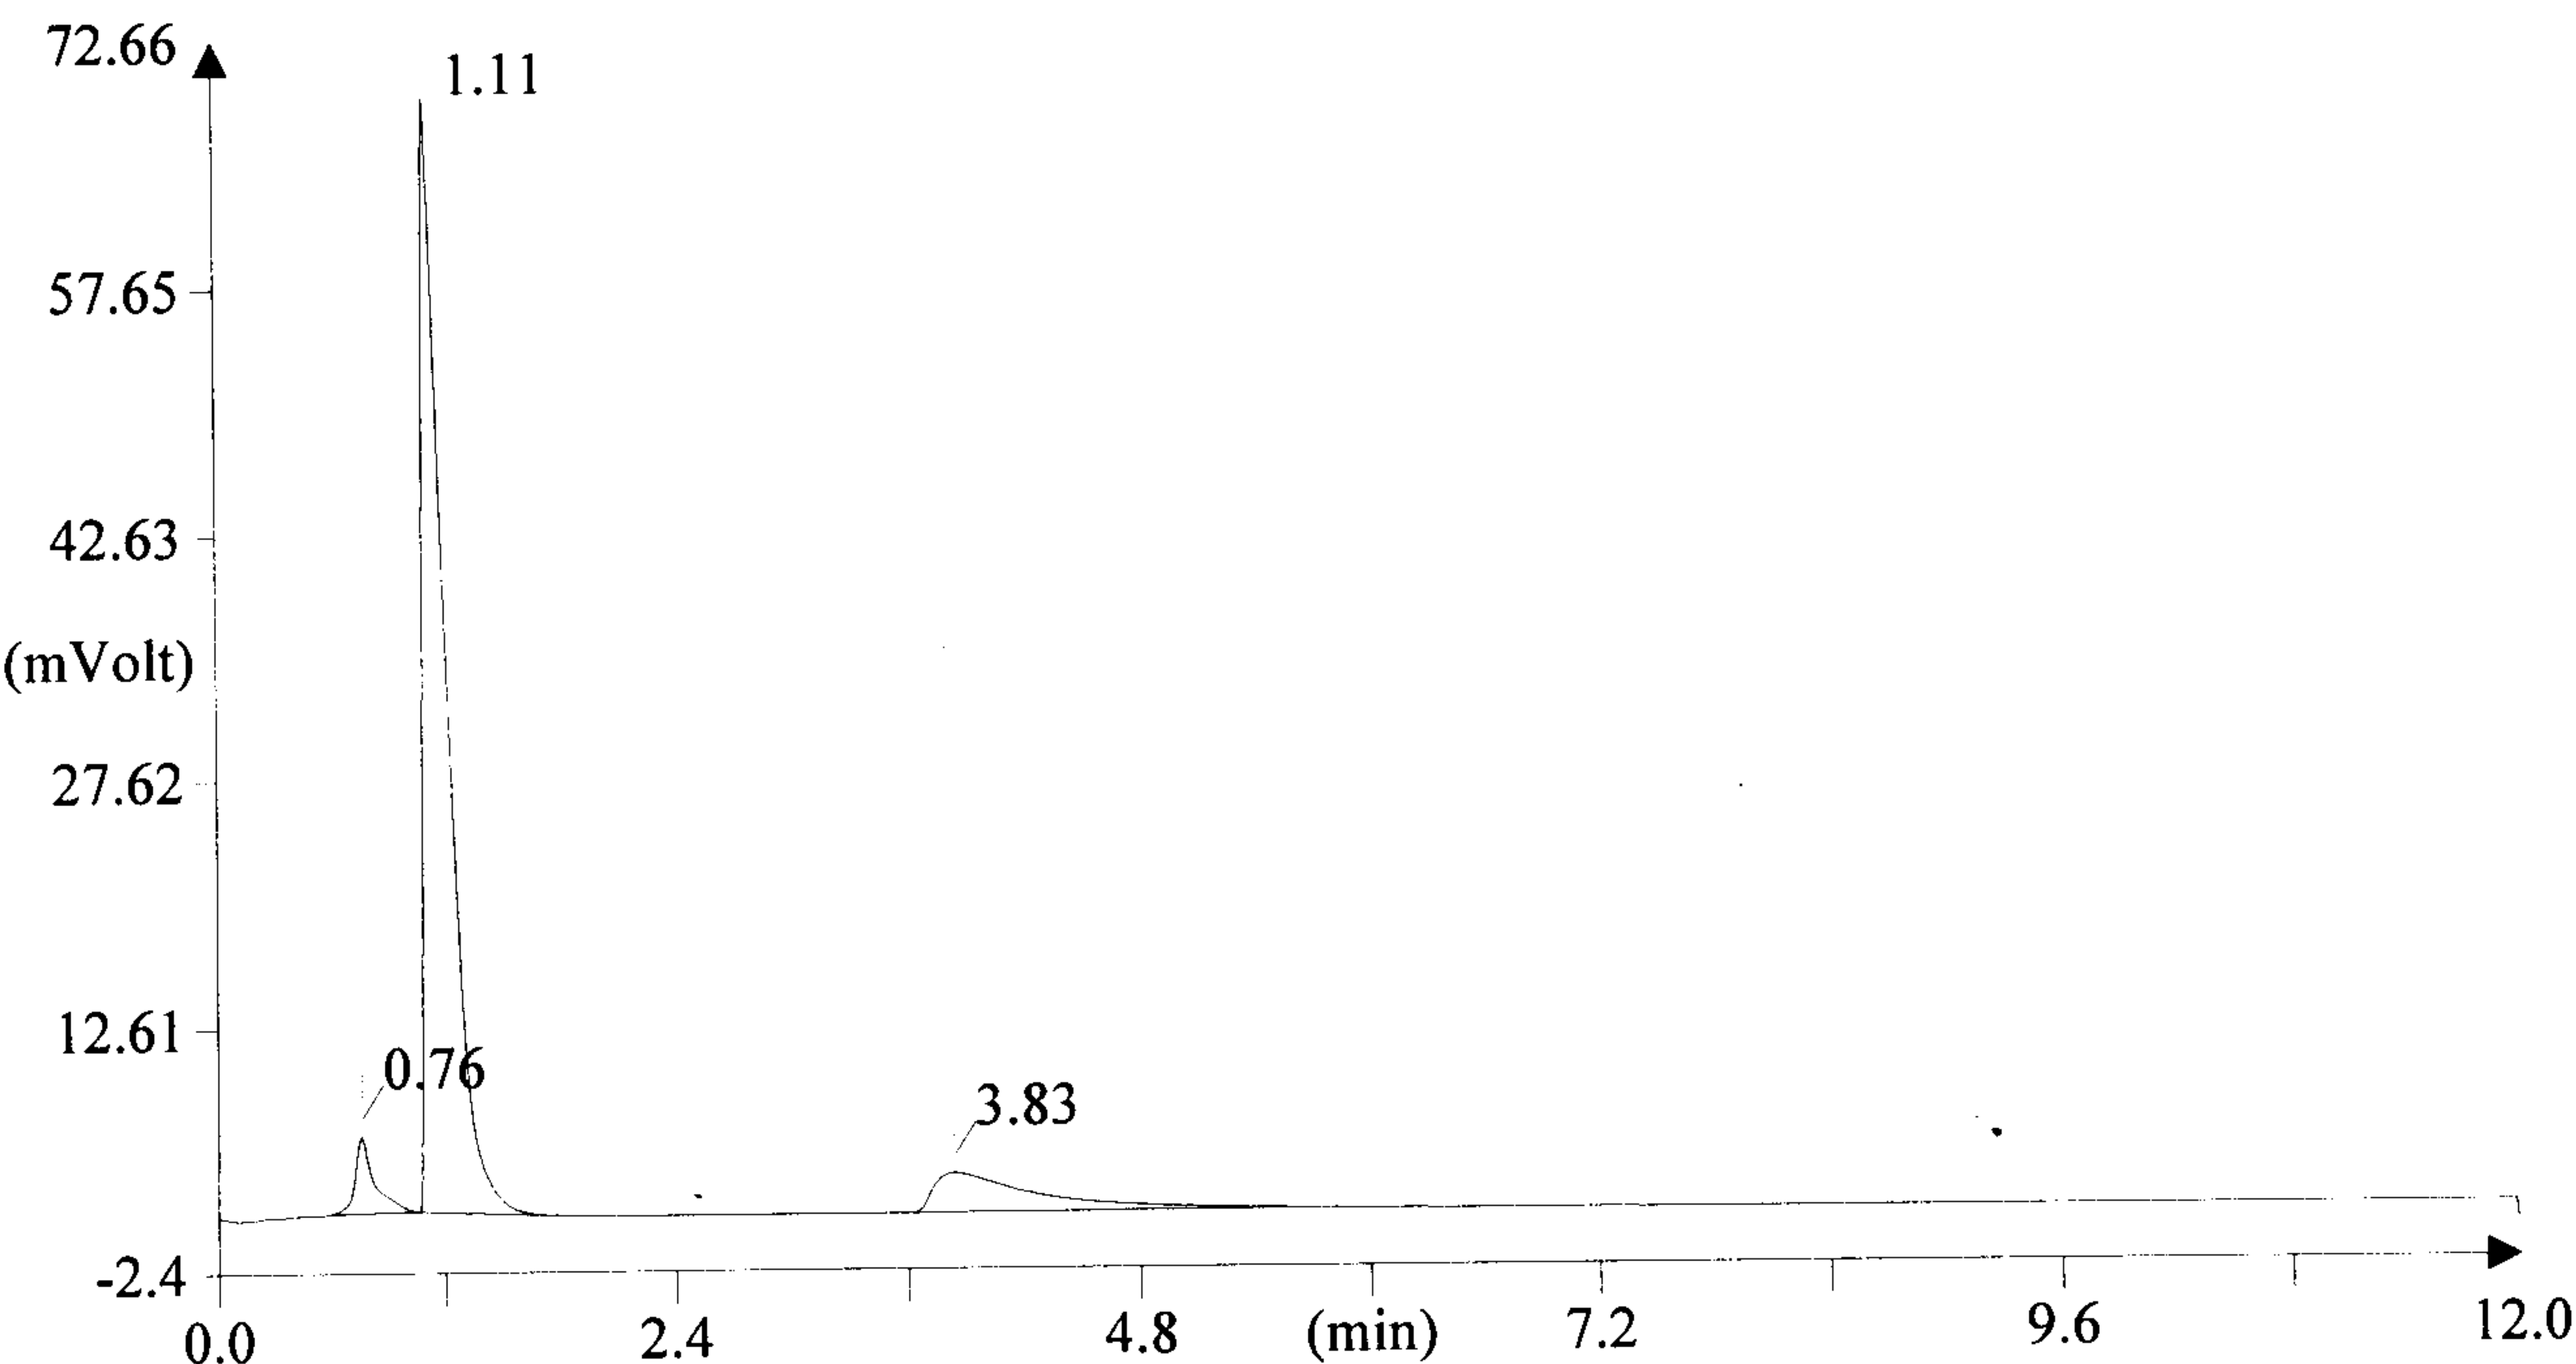

| Element Name | Element % | Ret. Time |
|--------------|-----------|-----------|
| Nitrogen     | 4.65      | 0.76      |
| Carbon       | 82.71     | 1.11      |
| Hydrogen     | 7.52      | 3.83      |

*Signature*

# FLASH EA 1112 SERIES CHN REPORT

## SCHOOL OF CHEMISTRY

## UNIVERSITY OF HYDERABAD

Method filename: I:\Program Files\Thermo Finnigan\Eager 300 for EA1112\DATA\Sys\_data\_exa  
 Sample ID: MBC-11-121-T1 (# 157)  
 Analysis type: UnkNown  
 Chromatogram filename: UNK-01042011-17.dat  
 Sample weight: 1.215

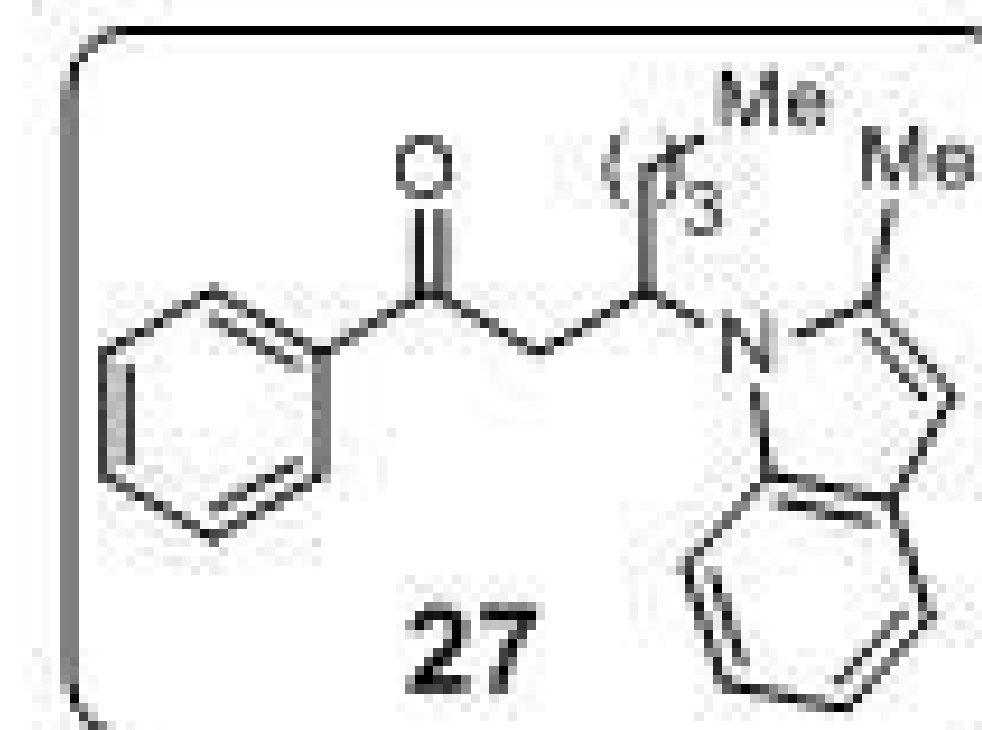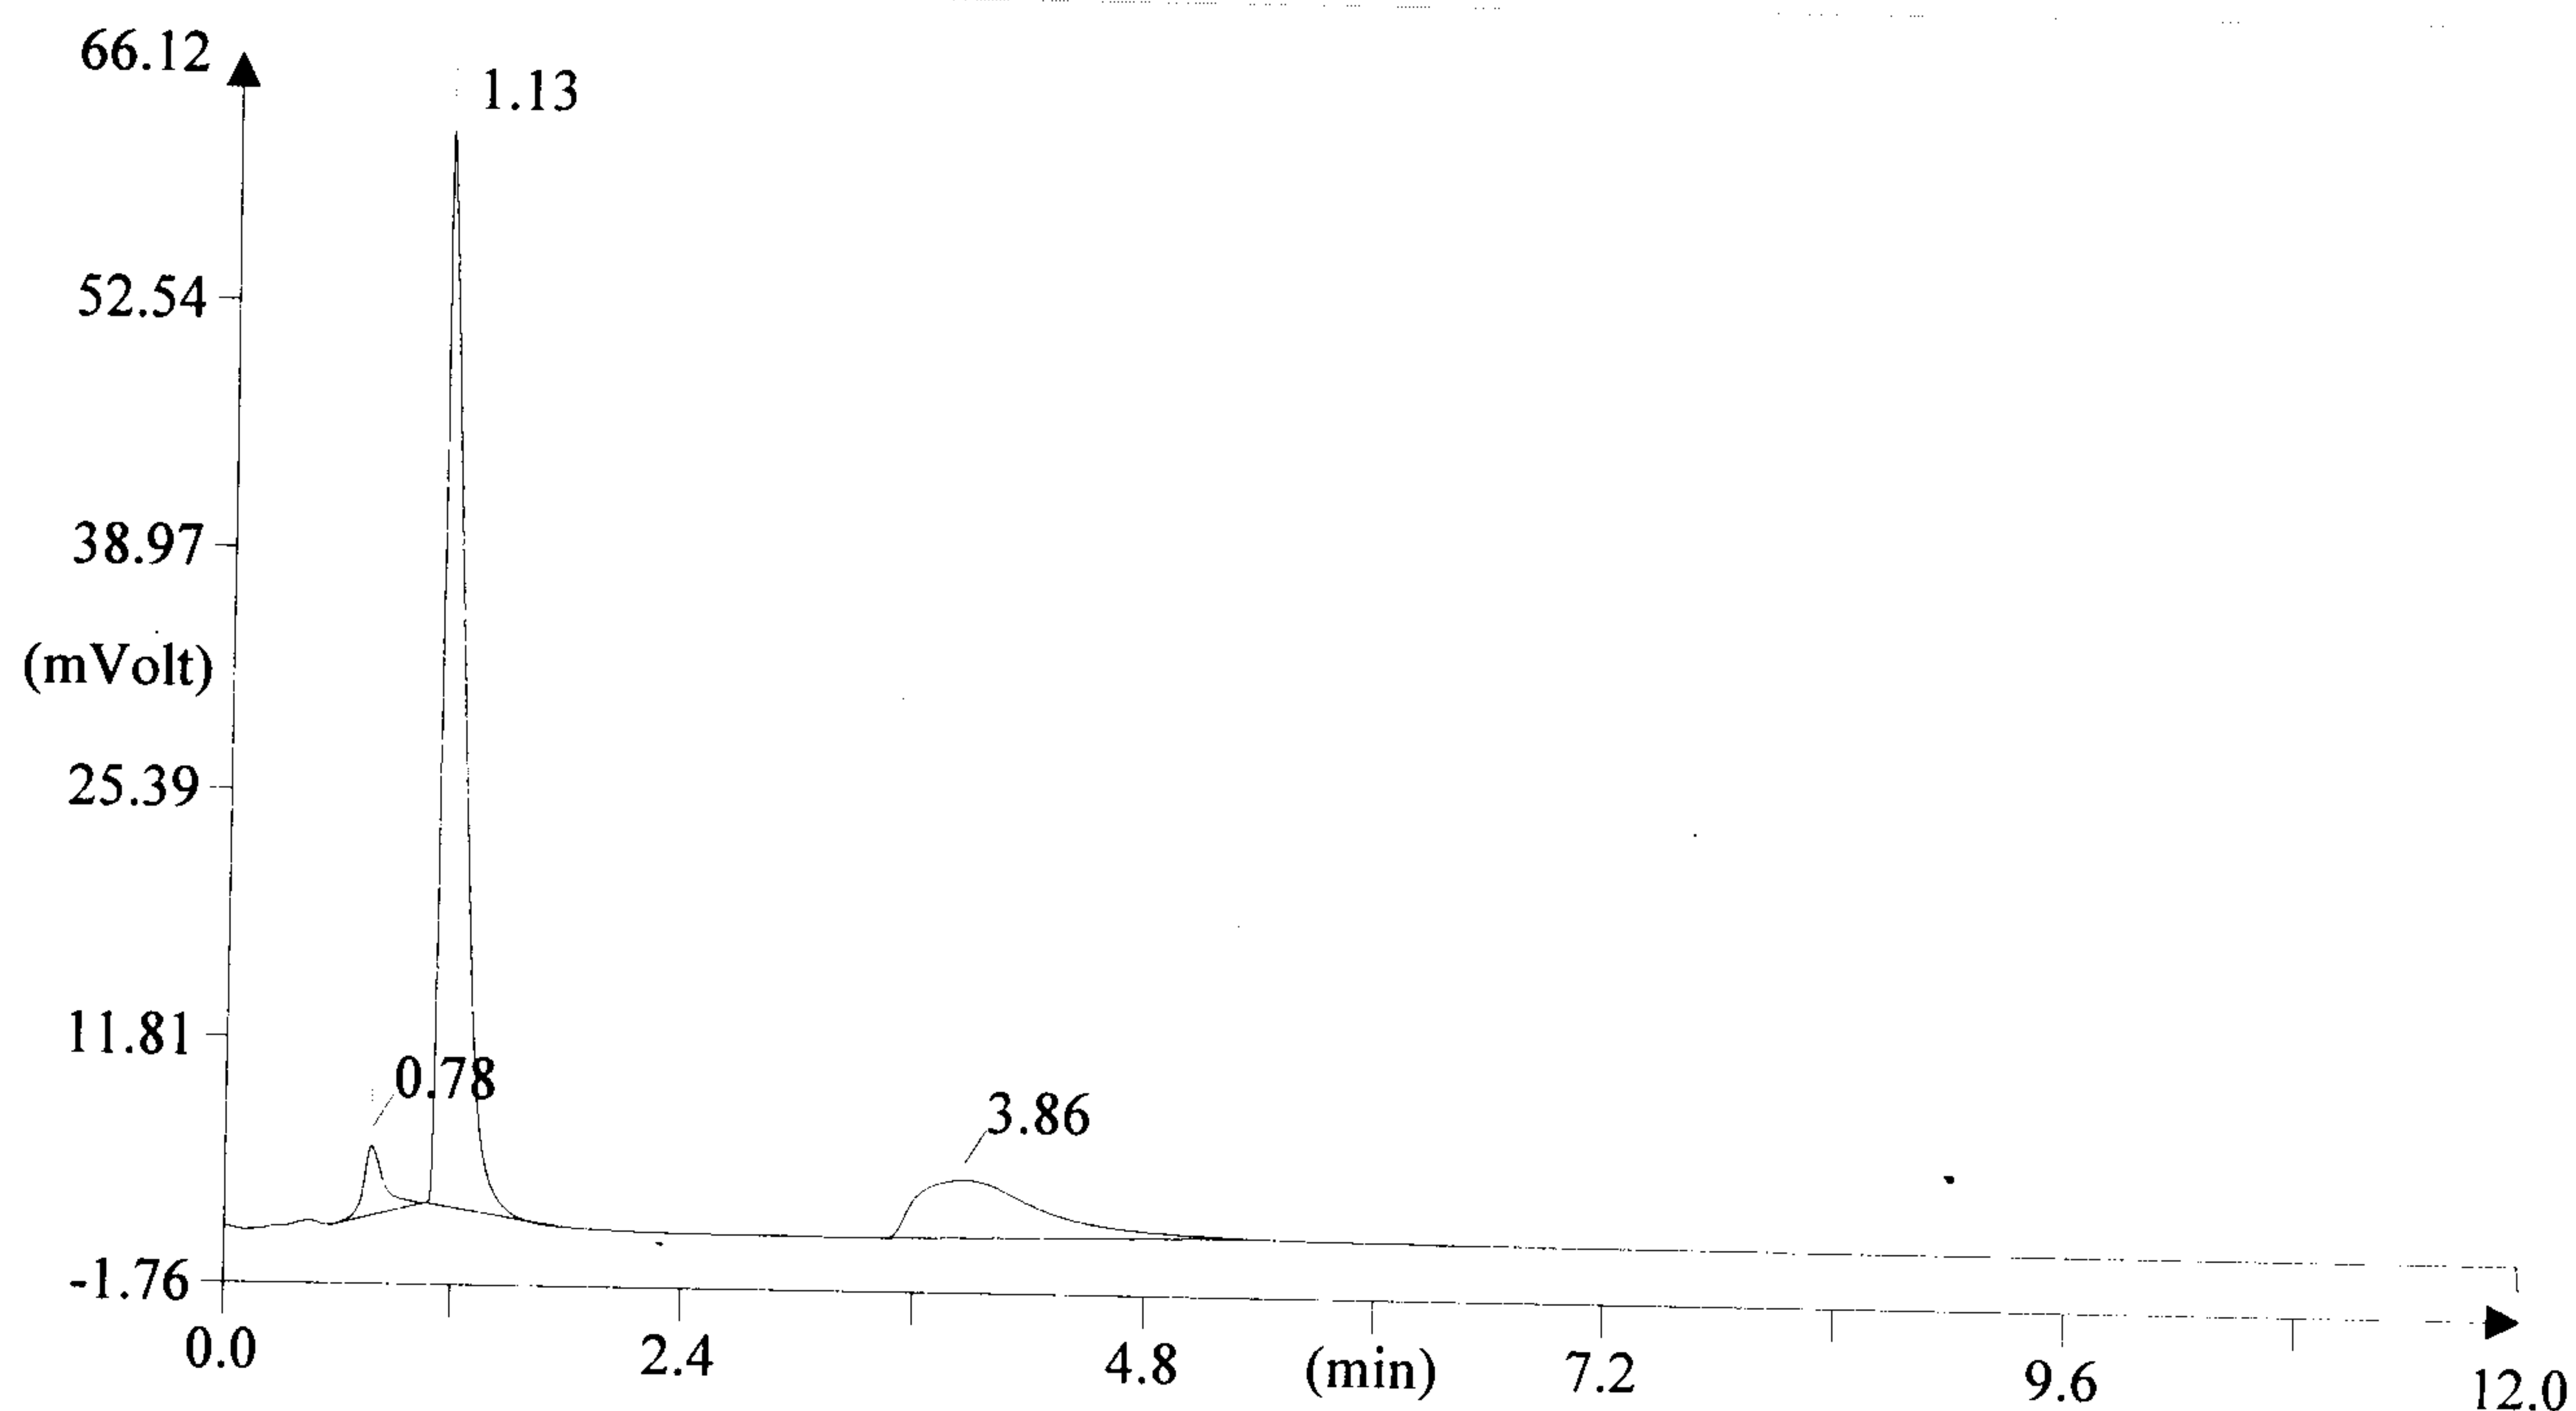

| Element Name | Element % | Ret. Time |
|--------------|-----------|-----------|
| Nitrogen     | 4. 43     | 0. 78     |
| Carbon       | 82. 59    | 1. 13     |
| Hydrogen     | 7. 81     | 3. 86     |

*CSH*

# FLASH EA 1112 SERIES CHN REPORT

## SCHOOL OF CHEMISTRY

## UNIVERSITY OF HYDERABAD

Method filename: E:\Program Files\Thermo Finnigan\Eager 300 for EA1112\DATA\Sys\_data\_ex  
 Sample ID: MBC-11-69-T2 (# 121)  
 Analysis type: UnkNown  
 Chromatogram filename: UNK-12072011-11.dat  
 Sample weight: 1.196

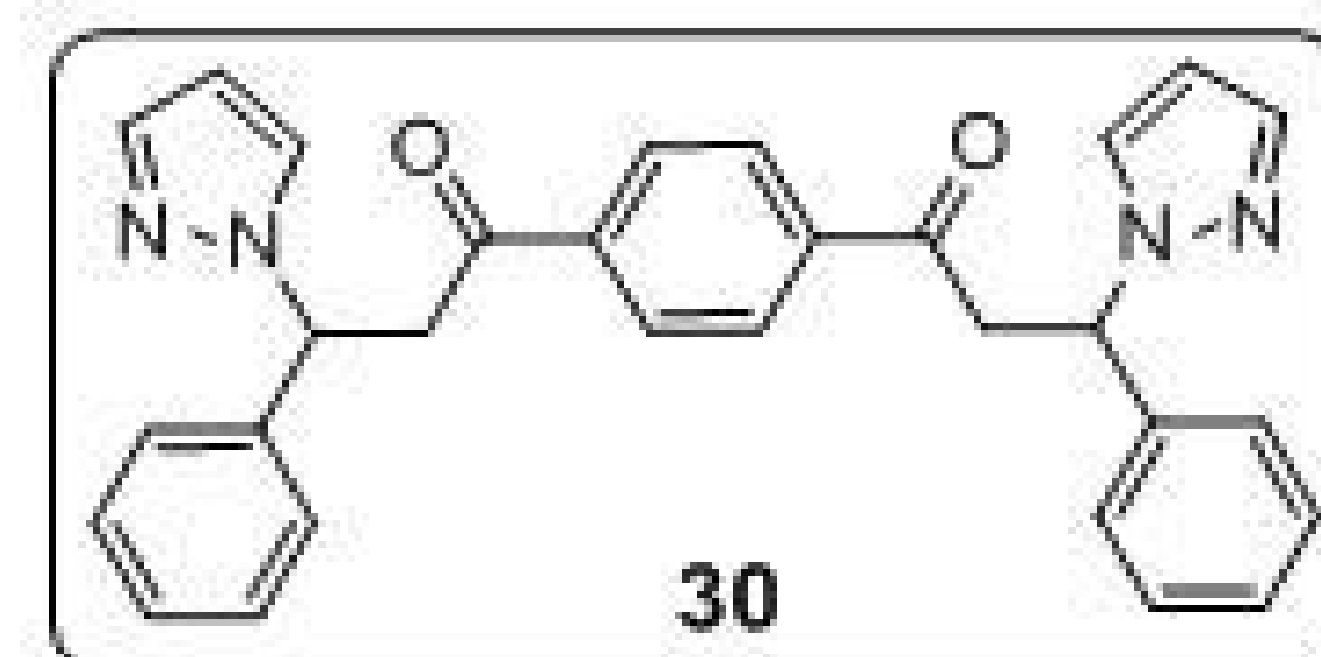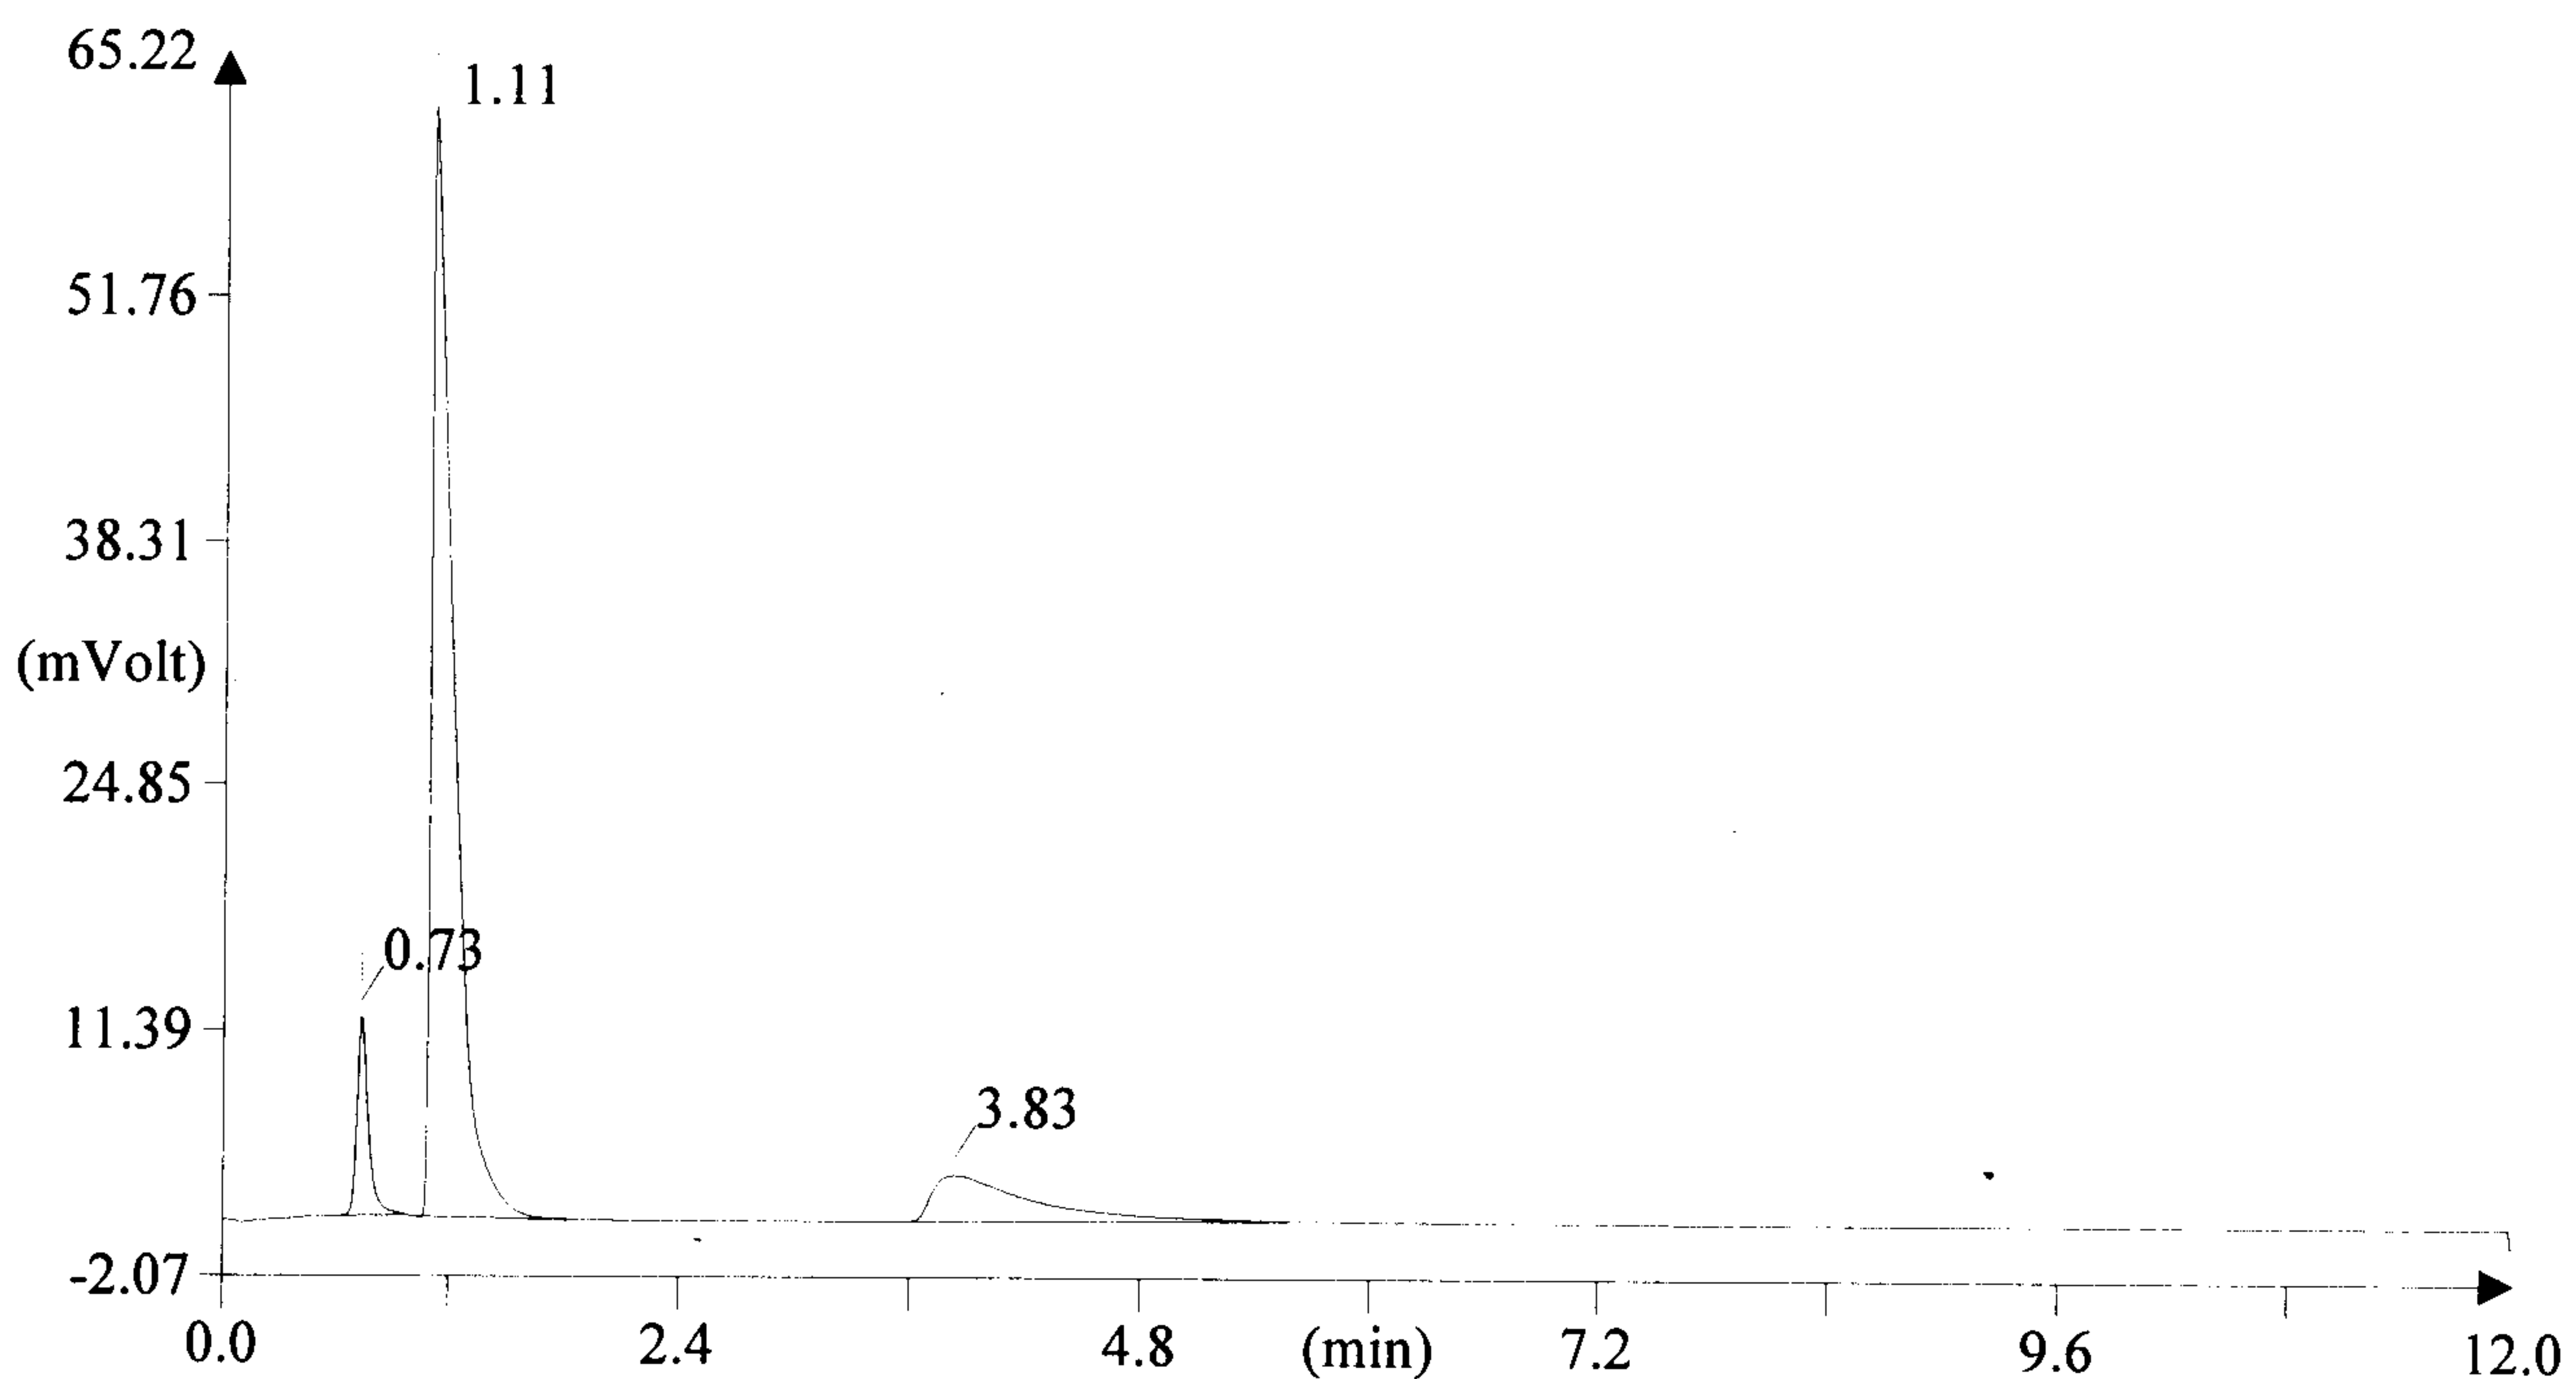

| Element Name | Element % | Ret. Time |
|--------------|-----------|-----------|
| Nitrogen     | 11. 68    | 0. 73     |
| Carbon       | 75. 86    | 1. 11     |
| Hydrogen     | 5. 49     | 3. 83     |

*OSK*



# FLASH EA 1112 SERIES CHN REPORT

## SCHOOL OF CHEMISTRY

## UNIVERSITY OF HYDERABAD

Method filename: E:\Program Files\Thermo Finnigan\Eager 300 for EA1112\DATA\Sys\_data\_ex  
 Sample ID: MBC-12-12-T3 (# 171)  
 Analysis type: UnkNown  
 Chromatogram filename: UNK-22082011-1.dat  
 Sample weight: 1.165

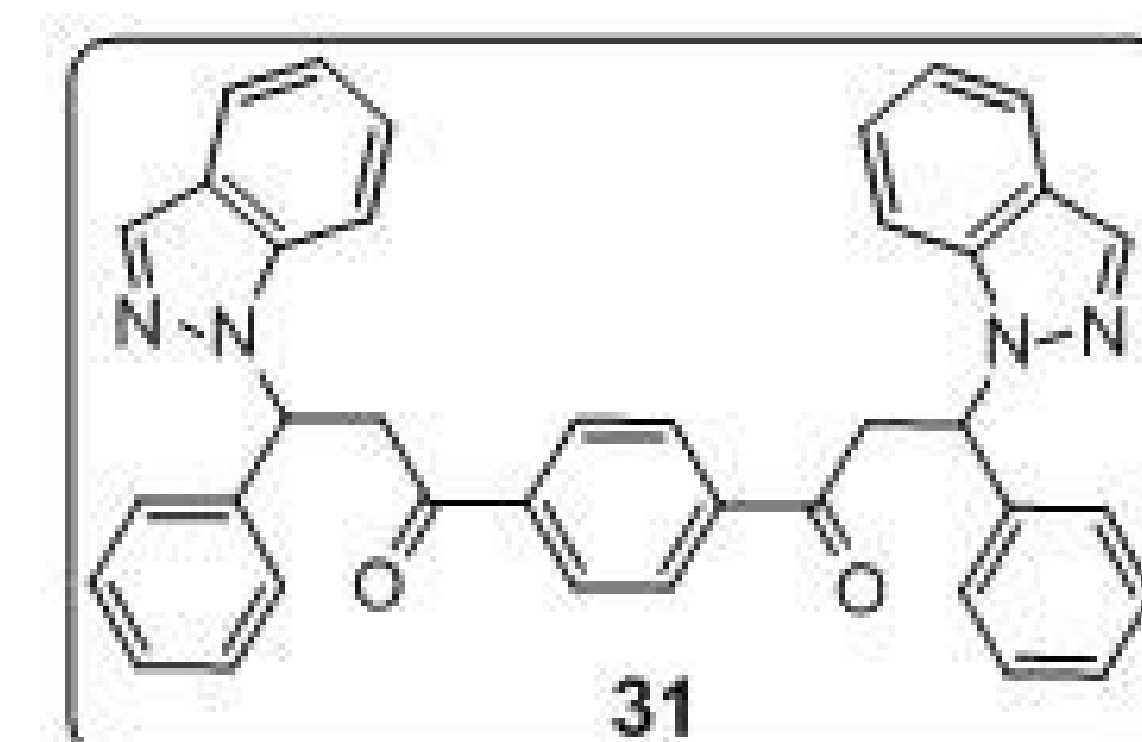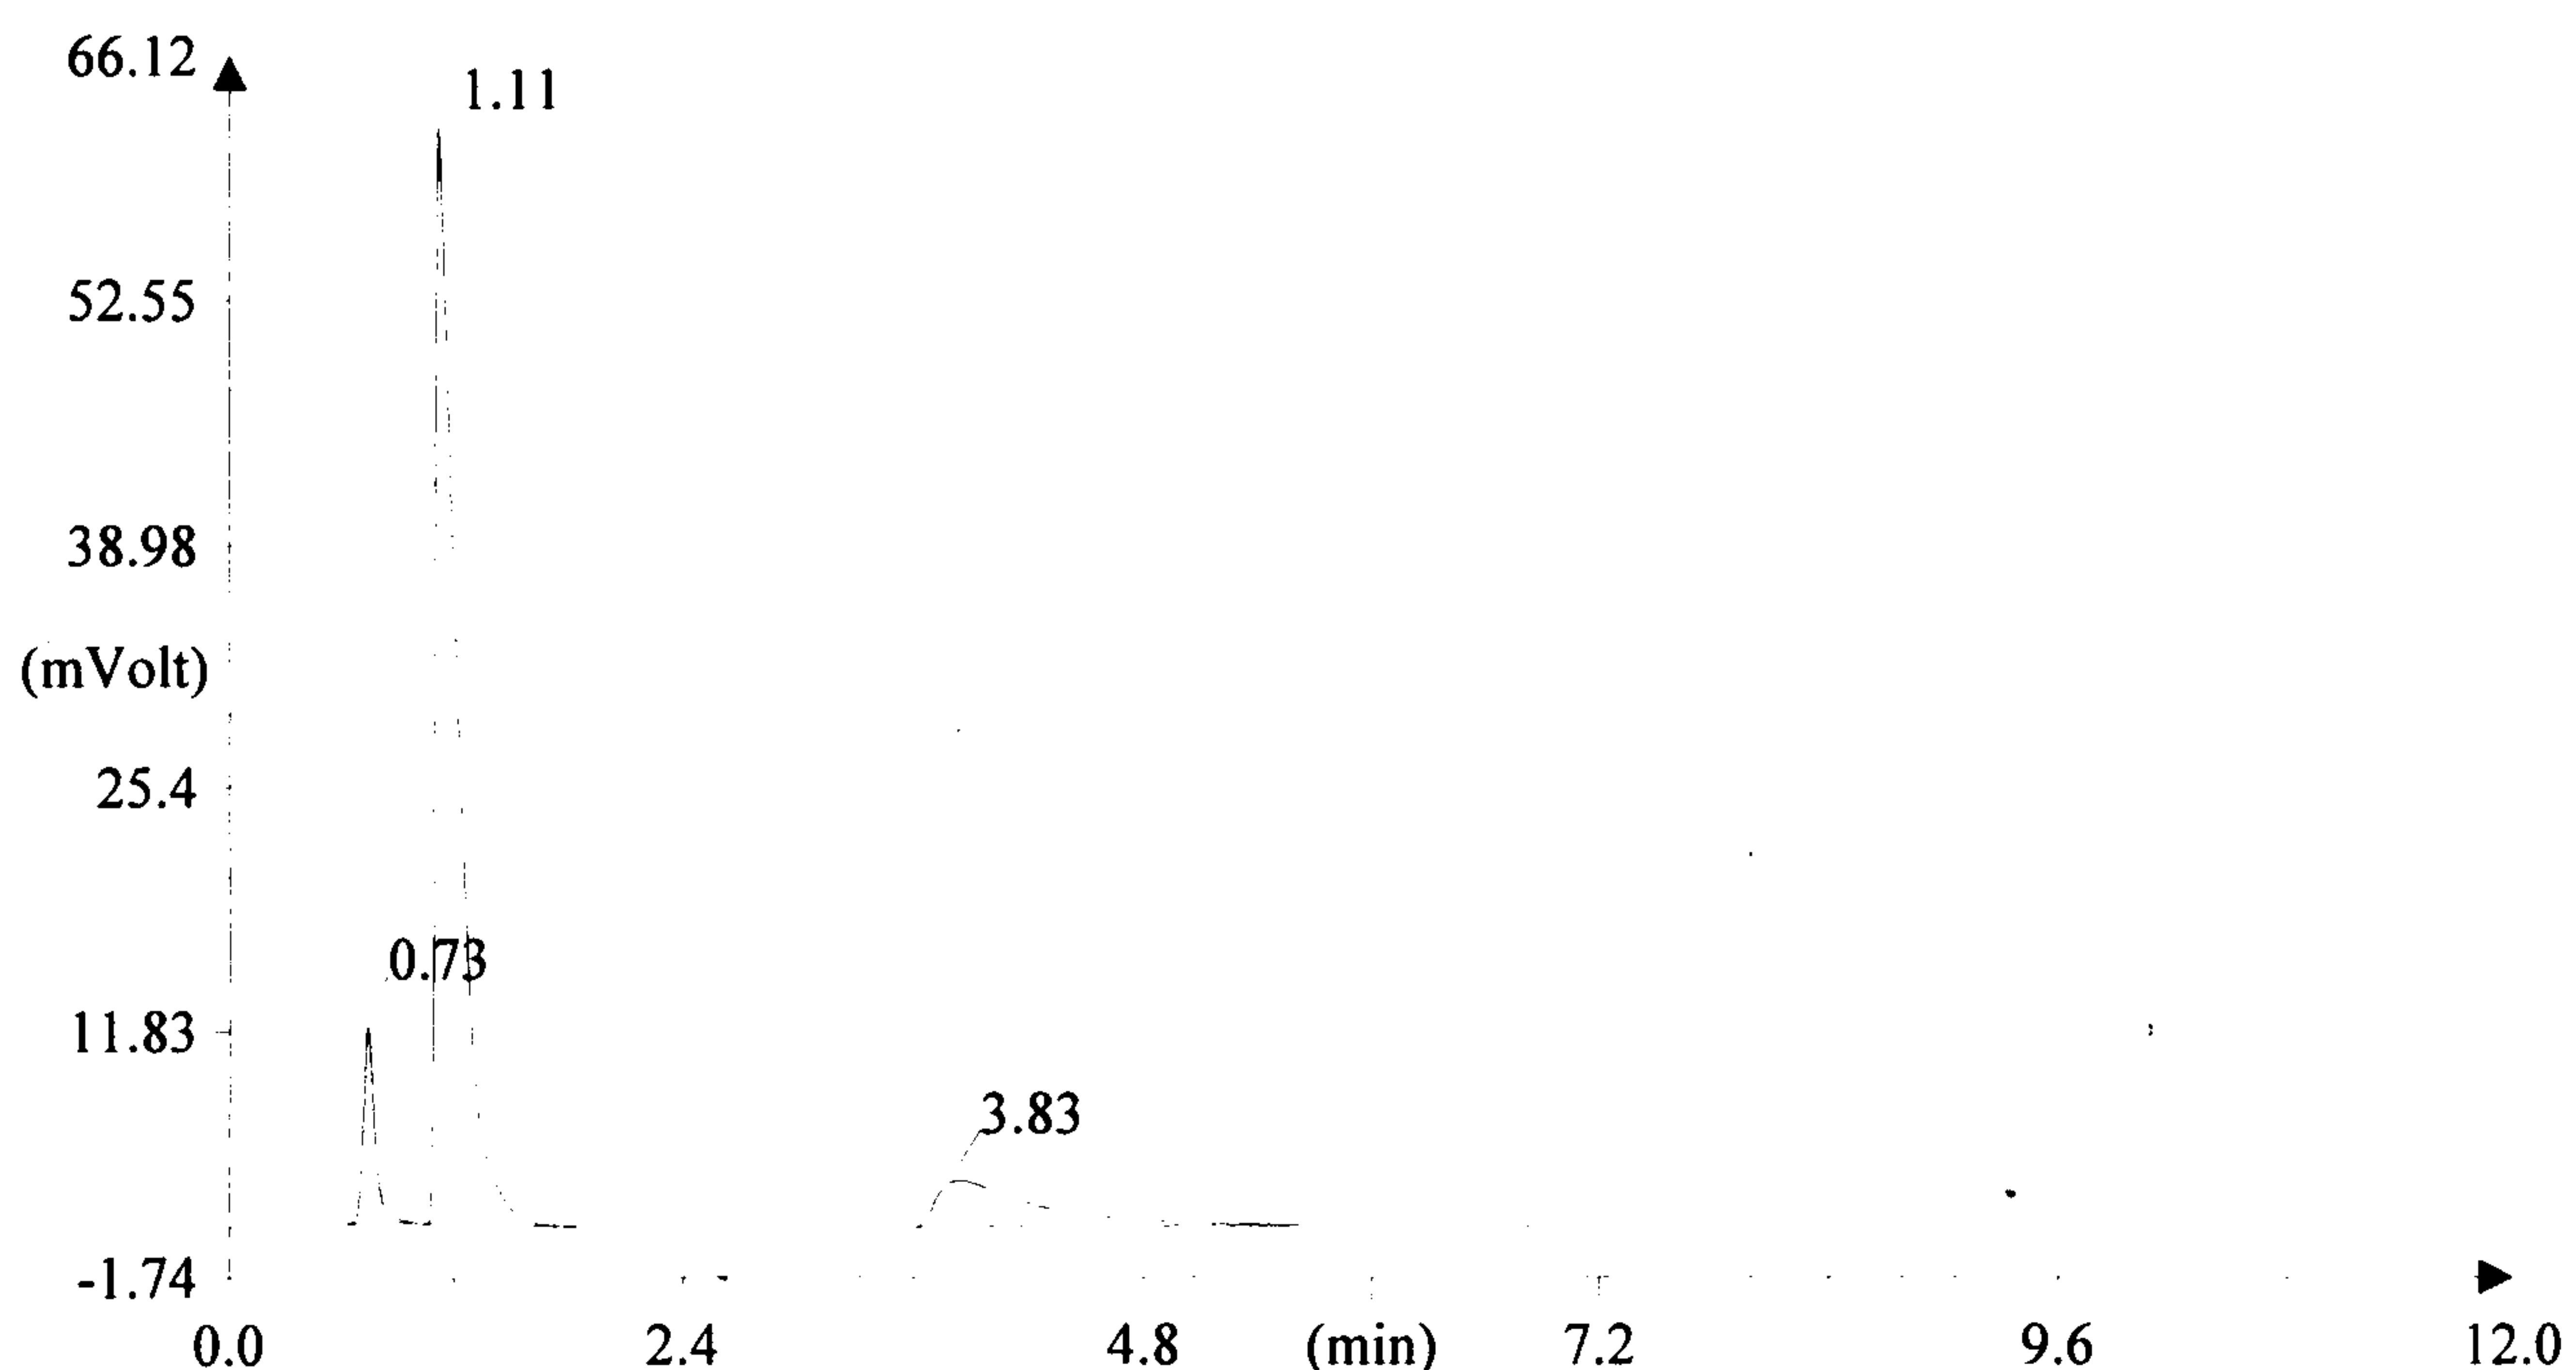

| Element Name | Element % | Ret. Time |
|--------------|-----------|-----------|
| Nitrogen     | 9.68      | 0.73      |
| Carbon       | 79.52     | 1.11      |
| Hydrogen     | 5.21      | 3.83      |

*CSL*
